# Supplementary material for: Single-cell full-length isoform sequencing reveals an abundance of 3’ prime partial transcripts in maternally inherited RNAs
Source: Research Square preprint supplement (doi:10.21203/rs.3.rs-1752209/v1), 2022-06-15
Supplement: Supplementary file 1 [file 2e33d92851f226fc05a25bac.xlsx]

## Sheet: stage specific gene
Gene name	Cluster
Ciao2b	Cluster1
Nfxl1	Cluster1
Ccdc69	Cluster1
Unc50	Cluster1
Erg28	Cluster1
Stard7	Cluster1
Lrr1	Cluster1
4931428L18Rik	Cluster1
Ssbp2	Cluster1
Rchy1	Cluster1
Oosp1	Cluster1
Ggct	Cluster1
Serpine2	Cluster1
Fbxw22	Cluster1
Commd2	Cluster1
Pttg1	Cluster1
Neil3	Cluster1
Trmt11	Cluster1
Zfp60	Cluster1
Acat1	Cluster1
Usp53	Cluster1
Rpa3	Cluster1
Magohb	Cluster1
Nup37	Cluster1
Dppa3	Cluster1
Trappc2	Cluster1
H1foo	Cluster1
Pdcd2l	Cluster1
Depdc7	Cluster1
Smim11	Cluster1
Omt2a	Cluster1
Gm11381	Cluster1
Tcl1b4	Cluster1
Omt2b	Cluster1
Frmd5	Cluster1
Mat2b	Cluster1
Arl6	Cluster1
Cul1	Cluster1
Smim14	Cluster1
Snrpb2	Cluster1
Med27	Cluster1
Cisd2	Cluster1
Immp1l	Cluster1
Cep164	Cluster1
Auh	Cluster1
Cenph	Cluster1
Stard3nl	Cluster1
Rsu1	Cluster1
Asf1a	Cluster1
Lmo1	Cluster1
Gm49164	Cluster1
Rbbp7	Cluster1
Srgn	Cluster1
Aurkc	Cluster1
Zfyve21	Cluster1
Ift43	Cluster1
Bin2	Cluster1
Arhgap28	Cluster1
Nae1	Cluster1
Lamtor3	Cluster1
Sec61b	Cluster1
B9d1	Cluster1
3110009E18Rik	Cluster1
Eif2b1	Cluster1
Coq10b	Cluster1
Mgst3	Cluster1
Tcl1b2	Cluster1
Hif1a	Cluster1
Dock7	Cluster1
Amfr	Cluster1
Dguok	Cluster1
Mbl2	Cluster1
Med30	Cluster1
Bub1b	Cluster1
Zfp873	Cluster1
Pfdn4	Cluster1
Cep55	Cluster1
Nit2	Cluster1
Cdk2ap2	Cluster1
Prdx1	Cluster1
Arhgef39	Cluster1
Mphosph6	Cluster1
Fbxo8	Cluster1
Slbp	Cluster1
Hmces	Cluster1
Dclre1a	Cluster1
Gm15629	Cluster1
Chn1	Cluster1
Unc5c	Cluster1
Tet3	Cluster1
Arcn1	Cluster1
Siah1b	Cluster1
Ngly1	Cluster1
Hirip3	Cluster1
5730480H06Rik	Cluster1
Smagp	Cluster1
Bpgm	Cluster1
Srd5a3	Cluster1
Zcchc8	Cluster1
Dipk2a	Cluster1
Bcl2l10	Cluster1
Tcl1b1	Cluster1
Slc44a2	Cluster1
Ezh2	Cluster1
Dlg2	Cluster1
Dnajb4	Cluster1
Ninj1	Cluster1
Polr2c	Cluster1
Smu1	Cluster1
Slc7a11	Cluster1
Tesc	Cluster1
Commd3	Cluster1
Zcchc10	Cluster1
Vta1	Cluster1
Dcp1a	Cluster1
Rubcn	Cluster1
Gm5065	Cluster1
Mei4	Cluster1
Gtf2a2	Cluster1
Oog3	Cluster1
Itga6	Cluster1
Atp6v1h	Cluster1
Ube2d3	Cluster1
Tspan9	Cluster1
Cobll1	Cluster1
Cyp19a1	Cluster1
Ccdc14	Cluster1
Edrf1	Cluster1
Mastl	Cluster1
Mdh1	Cluster1
Gm28784	Cluster1
Gm42650	Cluster1
Pdlim1	Cluster1
Cd55	Cluster1
Dpy30	Cluster1
Capn7	Cluster1
Il17f	Cluster1
Ankrd12	Cluster1
Copb1	Cluster1
Vti1a	Cluster1
Tcl1	Cluster1
1190005I06Rik	Cluster1
Skap2	Cluster1
Oosp3	Cluster1
9130409I23Rik	Cluster1
Elovl5	Cluster1
Itga9	Cluster1
Tm9sf2	Cluster1
Atl1	Cluster1
Stom	Cluster1
Cept1	Cluster1
Nxt1	Cluster1
Cmc4	Cluster1
Nlrp4b	Cluster1
Arfip1	Cluster1
Afap1l2	Cluster1
Ndfip1	Cluster1
D6Ertd474e	Cluster1
Tmem171	Cluster1
Fam13c	Cluster1
Fhod3	Cluster1
Tusc3	Cluster1
Mrps36	Cluster1
Gpr137c	Cluster1
Ube2h	Cluster1
Sub1	Cluster1
Afdn	Cluster1
Rxylt1	Cluster1
Whamm	Cluster1
0610033M10Rik	Cluster1
B3gnt4	Cluster1
Mitd1	Cluster1
Edc4	Cluster1
Cenpn	Cluster1
Ccndbp1	Cluster1
Cep57l1	Cluster1
Grm2	Cluster1
Ddb2	Cluster1
Bin3	Cluster1
Sec13	Cluster1
Trp53bp1	Cluster1
Tbc1d8	Cluster1
Slc35a1	Cluster1
Rnf34	Cluster1
Susd3	Cluster1
Jag1	Cluster1
Pcbd1	Cluster1
Sypl	Cluster1
Ica1	Cluster1
Tmem209	Cluster1
Prex2	Cluster1
D16Ertd519e	Cluster1
Btbd10	Cluster1
1810037I17Rik	Cluster1
Ndc80	Cluster1
Gnpda2	Cluster1
Arrdc2	Cluster1
Isl2	Cluster1
Vps72	Cluster1
Gm29663	Cluster1
Gdf9	Cluster1
Klhdc2	Cluster1
Ing1	Cluster1
Msh4	Cluster1
Cmya5	Cluster1
Gm47913	Cluster1
1110059G10Rik	Cluster1
Ebpl	Cluster1
Eny2	Cluster1
Cnot11	Cluster1
Fbxw4	Cluster1
Esyt2	Cluster1
Bbip1	Cluster1
Gm29811	Cluster1
Npc1	Cluster1
Ptov1	Cluster1
Atg16l1	Cluster1
Abhd13	Cluster1
Dcbld2	Cluster1
Mcm4	Cluster1
Epsti1	Cluster1
Zc3h6	Cluster1
Spire1	Cluster1
Ap3m1	Cluster1
Celsr1	Cluster1
Bmpr1b	Cluster1
Mansc1	Cluster1
Zup1	Cluster1
Gm48584	Cluster1
Cryl1	Cluster1
Pcdh15	Cluster1
Degs1	Cluster1
Tmem35b	Cluster1
St7	Cluster1
Sipa1l1	Cluster1
7420426K07Rik	Cluster1
Yaf2	Cluster1
2310061I04Rik	Cluster1
Rnf114	Cluster1
Tmem243	Cluster1
Gm37240	Cluster1
Ccdc122	Cluster1
4921524J17Rik	Cluster1
Cd160	Cluster1
Sec31a	Cluster1
Lrrfip1	Cluster1
Tbc1d22b	Cluster1
Csad	Cluster1
Fam107b	Cluster1
2022-03-06	Cluster1
A530021J07Rik	Cluster1
Steap2	Cluster1
Lamb1	Cluster1
E130311K13Rik	Cluster1
Mtcp1	Cluster1
Gpr180	Cluster1
Tmem201	Cluster1
Unc13b	Cluster1
Mthfsl	Cluster1
Spata7	Cluster1
Eps8	Cluster1
Fbxl17	Cluster1
Ext1	Cluster1
Kcnh1	Cluster1
Tgds	Cluster1
Rbm18	Cluster1
Yipf4	Cluster1
Pomgnt1	Cluster1
Lrp1	Cluster1
Tex30	Cluster1
Ptpro	Cluster1
Tmem150a	Cluster1
Abhd16a	Cluster1
D030018L15Rik	Cluster1
Tubb3	Cluster1
C87499	Cluster1
Ctbp2	Cluster1
Nat14	Cluster1
Lurap1l	Cluster1
Hsd17b13	Cluster1
Dusp14	Cluster1
Tnks1bp1	Cluster1
Nudt7	Cluster1
Lrrc49	Cluster1
B530045E10Rik	Cluster1
Lpcat2	Cluster1
Gm21844	Cluster1
Mindy3	Cluster1
Cep44	Cluster1
Cpa1	Cluster1
Lrrc17	Cluster1
Ripk2	Cluster1
Vps50	Cluster1
Slc25a31	Cluster1
Pabpn1l	Cluster1
Ccdc74a	Cluster1
Pid1	Cluster1
Pex13	Cluster1
Tex11	Cluster1
Baiap2l1	Cluster1
Sall4	Cluster1
Plpp5	Cluster1
Gm47407	Cluster1
Blvra	Cluster1
Rcn2	Cluster1
Slc22a23	Cluster1
Slc45a3	Cluster1
Zswim3	Cluster1
Dnajc3	Cluster1
Fut10	Cluster1
Smg8	Cluster1
Muc4	Cluster1
Zfp277	Cluster1
Mmp12	Cluster1
Setd6	Cluster1
Nmd3	Cluster1
E330016L19Rik	Cluster1
Mfap2	Cluster1
Blm	Cluster1
Tpra1	Cluster1
Clk1	Cluster1
Gm2309	Cluster1
Gdpd1	Cluster1
Ganc	Cluster1
Mroh2b	Cluster1
Smoc2	Cluster1
Rnf14	Cluster1
Tank	Cluster1
Nrn1l	Cluster1
Tmco3	Cluster1
Gm20617	Cluster1
Kcnq1	Cluster1
Slc16a10	Cluster1
Gpr149	Cluster1
Tbpl2	Cluster1
Zkscan16	Cluster1
Dcdc2a	Cluster1
Slc12a9	Cluster1
Morf4l2	Cluster1
Atp2b1	Cluster1
Gm42953	Cluster1
E2f5	Cluster1
Tmem128	Cluster1
D030068K23Rik	Cluster1
Gm15668	Cluster1
Gm30108	Cluster1
Cldn34b2	Cluster1
Sytl2	Cluster1
Tm7sf3	Cluster1
Dse	Cluster1
Cd300c	Cluster1
Gm7437	Cluster1
Arl8b	Cluster1
Laptm4b	Cluster1
Pex26	Cluster1
Zdhhc8	Cluster1
1190007I07Rik	Cluster1
Gm11846	Cluster1
Dusp1	Cluster1
Gm7995	Cluster1
Lysmd4	Cluster1
Gpm6a	Cluster1
Txndc5	Cluster1
Senp8	Cluster1
Arsb	Cluster1
Med22	Cluster1
C230057A21Rik	Cluster1
Pxt1	Cluster1
Exoc1	Cluster1
Zdhhc13	Cluster1
Fam92a	Cluster1
Plat	Cluster1
Slc31a2	Cluster1
Unc5a	Cluster1
Pcbp2	Cluster1
Fignl1	Cluster1
Tcaim	Cluster1
Fbxl6	Cluster1
Gm36243	Cluster1
Plxna1	Cluster1
Slc6a20b	Cluster1
Rnf219	Cluster1
Palb2	Cluster1
Klhl18	Cluster1
Prr23a3	Cluster1
Saraf	Cluster1
6430710C18Rik	Cluster1
Znrf2	Cluster1
Gm45490	Cluster1
Accsl	Cluster1
Prmt2	Cluster1
Wdr20	Cluster1
Tbc1d14	Cluster1
Wfdc3	Cluster1
1700066M21Rik	Cluster1
Vwa2	Cluster1
Pcid2	Cluster1
Pdp1	Cluster1
Lyst	Cluster1
Thsd7a	Cluster1
Gm49938	Cluster1
Tmem30b	Cluster1
Rab3d	Cluster1
Serpini1	Cluster1
Rgs10	Cluster1
Golm1	Cluster1
AW146154	Cluster1
Atxn2l	Cluster1
Mpdz	Cluster1
AU023070	Cluster1
5530601H04Rik	Cluster1
Myl4	Cluster1
Ppp1r3d	Cluster1
Fam221a	Cluster1
Eif2ak1	Cluster1
Klhl9	Cluster1
Zfp931	Cluster1
Abraxas1	Cluster1
Pard6g	Cluster1
Cdc26	Cluster1
Ldlrad3	Cluster1
Agk	Cluster1
Tmtc3	Cluster1
Sc5d	Cluster1
Rdh12	Cluster1
9630014M24Rik	Cluster1
Mrpl3	Cluster1
Scarb1	Cluster1
Nipsnap2	Cluster1
Platr30	Cluster1
Atat1	Cluster1
Nab2	Cluster1
Sestd1	Cluster1
Gm17171	Cluster1
Mknk1	Cluster1
9130015A21Rik	Cluster1
Adgra3	Cluster1
Gm28989	Cluster1
Ubqln2	Cluster1
Rpusd4	Cluster1
Stat3	Cluster1
Tmem74	Cluster1
Zfp616	Cluster1
Atp11a	Cluster1
Ppa2	Cluster1
Mos	Cluster1
Cenpv	Cluster1
E130111B04Rik	Cluster1
Med20	Cluster1
Ice2	Cluster1
Tmbim1	Cluster1
Esr1	Cluster1
Cdv3	Cluster1
Foxk1	Cluster1
Hist1h2bc	Cluster1
Gm20052	Cluster1
Pdcd6	Cluster1
Astl	Cluster1
Zfp235	Cluster1
Hbs1l	Cluster1
1700048O20Rik	Cluster1
Tubal3	Cluster1
Diras2	Cluster1
Pole2	Cluster1
Poc1b	Cluster1
Gas2l3	Cluster1
Gm33035	Cluster1
Gsdmc4	Cluster1
Mkln1	Cluster1
Pex7	Cluster1
Col6a3	Cluster1
Gm35167	Cluster1
Mesp2	Cluster1
Ttyh3	Cluster1
Fgf7	Cluster1
Nrg4	Cluster1
Ctbs	Cluster1
Gk	Cluster1
Clptm1l	Cluster1
Fbxo21	Cluster1
Kdm6b	Cluster1
Gm26725	Cluster1
Abhd11	Cluster1
Taz	Cluster1
Fam155a	Cluster1
Sh3yl1	Cluster1
Rraga	Cluster1
Gm45645	Cluster1
Cpvl	Cluster1
Mt4	Cluster1
Gm12668	Cluster1
Dlg5	Cluster1
Lrp11	Cluster1
Rnf26	Cluster1
Ccnyl1	Cluster1
Fsd1l	Cluster1
Gm31135	Cluster1
Cxcr3	Cluster1
Sertad3	Cluster1
Rap1gds1	Cluster1
Lsm14b	Cluster1
Dclk3	Cluster1
Gng4	Cluster1
Cpb1	Cluster1
Zdhhc24	Cluster1
Taf8	Cluster1
Hectd1	Cluster1
Sycp2	Cluster1
Tsga10	Cluster1
Pparg	Cluster1
Dipk1b	Cluster1
Ormdl1	Cluster1
Themis	Cluster1
Mfsd9	Cluster1
Arf5	Cluster1
Llgl1	Cluster1
Zc4h2	Cluster1
Gm43263	Cluster1
Nudt6	Cluster1
Sycp2l	Cluster1
Gm4981	Cluster1
Pdzrn3	Cluster1
Fam49a	Cluster1
Gm15091	Cluster1
Tmem9b	Cluster1
Fzd7	Cluster1
Pex1	Cluster1
Adpgk	Cluster1
Ufl1	Cluster1
Ccdc85a	Cluster1
Il1rap	Cluster1
Prr32	Cluster1
Il17c	Cluster1
Dnajc5b	Cluster1
Enpp2	Cluster1
Ttll5	Cluster1
Slc12a5	Cluster1
Furin	Cluster1
Slc18a2	Cluster1
Iglv1	Cluster1
Nfkbiz	Cluster1
Pigm	Cluster1
Jazf1	Cluster1
Sec24d	Cluster1
Serpinb3a	Cluster1
Zfp692	Cluster1
Gm31219	Cluster1
Prl8a2	Cluster1
Fam167a	Cluster1
Slc6a20a	Cluster1
Gm49898	Cluster1
Mgat4b	Cluster1
S100a14	Cluster1
Neo1	Cluster1
Chn2	Cluster1
Prg4	Cluster1
Wnk2	Cluster1
Akr1cl	Cluster1
Klhl1	Cluster1
Csf1	Cluster1
Gm3669	Cluster1
Cxcl13	Cluster1
Kcnk13	Cluster1
Anxa5	Cluster1
Cers6	Cluster1
Stt3a	Cluster1
Nek1	Cluster1
Plppr5	Cluster1
2022-03-07	Cluster1
Add3	Cluster1
Spon2	Cluster1
C430014B12Rik	Cluster1
Foxred2	Cluster1
Capn12	Cluster1
Magi2	Cluster1
Gm15389	Cluster1
Sav1	Cluster1
Plac1	Cluster1
Copg2	Cluster1
Acap2	Cluster1
Gm8011	Cluster1
4930528D03Rik	Cluster1
Cndp1	Cluster1
Btk	Cluster1
Gm49732	Cluster1
Prex1	Cluster1
Phykpl	Cluster1
Sema6d	Cluster1
Rtn4r	Cluster1
Phip	Cluster1
Nr2c1	Cluster1
Gm12511	Cluster1
Gm15606	Cluster1
Gm14085	Cluster1
Pla2g12b	Cluster1
Smug1	Cluster1
Igkv13-87	Cluster1
Car8	Cluster1
Krt10	Cluster1
Gphn	Cluster1
Pla2g12a	Cluster1
Steap4	Cluster1
Dag1	Cluster1
Exo5	Cluster1
Focad	Cluster1
Lrif1	Cluster1
Cdh1	Cluster1
Galnt9	Cluster1
Shcbp1l	Cluster1
Atrn	Cluster1
Slc30a9	Cluster1
Lpcat1	Cluster1
Ntn1	Cluster1
Pdia6	Cluster1
Oacyl	Cluster1
Sema4d	Cluster1
Arhgap15	Cluster1
2210408I21Rik	Cluster1
Il23a	Cluster1
Peli1	Cluster1
Gm26827	Cluster1
Gxylt1	Cluster1
Tcerg1l	Cluster1
Lratd2	Cluster1
Ccdc171	Cluster1
Lrp1b	Cluster1
Vmn1r76	Cluster1
Shisa5	Cluster1
2300002M23Rik	Cluster1
Slc35b3	Cluster1
Spock3	Cluster1
Slc44a1	Cluster1
Cul4a	Cluster1
Clstn1	Cluster1
Asb3	Cluster1
Mfsd14b	Cluster1
Mettl17	Cluster1
Dgcr2	Cluster1
Suclg2	Cluster1
Ttbk2	Cluster1
Rnf139	Cluster1
Trpc4	Cluster1
Gm30239	Cluster1
Slc7a8	Cluster1
Hectd2	Cluster1
Galnt11	Cluster1
0610009L18Rik	Cluster1
Fbxo3	Cluster1
Abca16	Cluster1
Snx25	Cluster1
Zfp580	Cluster1
Efna1	Cluster1
Gm11548	Cluster1
Gm11917	Cluster1
Zfp512b	Cluster1
Fancd2	Cluster1
Tuba3b	Cluster1
Ankrd66	Cluster1
Tfec	Cluster1
4930539E08Rik	Cluster1
E330034G19Rik	Cluster1
Hpf1	Cluster1
Obox1	Cluster1
Mob4	Cluster1
Obox7	Cluster1
Ccdc90b	Cluster1
Btg4	Cluster1
Nuf2	Cluster1
Tcl1b3	Cluster1
Snrnp27	Cluster1
Mad2l1	Cluster1
Orc5	Cluster1
Orc6	Cluster1
Rfpl4	Cluster1
Obox2	Cluster1
Cdc42bpa	Cluster1
Tvp23b	Cluster1
Ighg2b	Cluster1
Tsc22d1	Cluster1
Atp2c1	Cluster1
Nedd4l	Cluster1
Mcu	Cluster1
Dhrs1	Cluster1
Gmds	Cluster1
Tcl1b5	Cluster1
Fbxw18	Cluster1
Uchl1	Cluster1
Pigp	Cluster1
Creb3l4	Cluster1
Fam90a1a	Cluster1
Sclt1	Cluster1
Pigf	Cluster1
Gipc2	Cluster1
D6Ertd527e	Cluster1
Bscl2	Cluster1
Obox5	Cluster1
Ccnb2	Cluster1
Ccdc34	Cluster1
Rgs2	Cluster1
Ccdc84	Cluster1
Fbxw28	Cluster1
Fbxw14	Cluster1
Uhrf1	Cluster1
Cgas	Cluster1
Gng5	Cluster1
Eif5b	Cluster1
Sirt4	Cluster1
Rdx	Cluster1
Lpl	Cluster1
Cacnb2	Cluster1
2810408I11Rik	Cluster1
Gm13465	Cluster1
Knstrn	Cluster1
Oas1e	Cluster1
Phf20	Cluster1
Timm21	Cluster1
6720468P15Rik	Cluster1
Fbxw24	Cluster1
AU016765	Cluster1
Chd9	Cluster1
Fer	Cluster1
Fbxw19	Cluster1
Mtpap	Cluster1
Cd164l2	Cluster1
Chsy1	Cluster1
Ldhb	Cluster1
Gja4	Cluster1
Cdc34b	Cluster1
Cox10	Cluster1
Gm31816	Cluster1
Nceh1	Cluster1
Glrx	Cluster1
Zfp423	Cluster1
Fnbp1l	Cluster1
Cox6b2	Cluster1
Plac8	Cluster1
Daw1	Cluster1
Ighg1	Cluster1
Cenpf	Cluster1
Rln3	Cluster1
Pecr	Cluster1
Gm47066	Cluster1
Rtf1	Cluster1
Cenpx	Cluster1
Npm2	Cluster1
Pter	Cluster1
Camta1	Cluster1
Nr2e3	Cluster1
Chd6	Cluster1
Tax1bp3	Cluster1
Map3k6	Cluster1
Gm20490	Cluster1
Nrp1	Cluster1
Bbs5	Cluster1
Nexn	Cluster1
Npffr2	Cluster1
Cmtm8	Cluster1
Gm2479	Cluster1
Gtf2b	Cluster1
Hsf5	Cluster1
Gm50097	Cluster1
Oas1h	Cluster1
Nkd1	Cluster1
Fbxw20	Cluster1
Il6st	Cluster1
Stard13	Cluster1
Foxo1	Cluster1
Gm839	Cluster1
Ms4a1	Cluster1
A330093E20Rik	Cluster1
Abi3bp	Cluster1
Smc3	Cluster1
Dusp23	Cluster1
Msantd3	Cluster1
Tmem181a	Cluster1
Herpud2	Cluster1
Trim60	Cluster1
Tspan14	Cluster1
Cirbp	Cluster1
Mphosph8	Cluster1
Mfsd13b	Cluster1
Miox	Cluster1
Rspo2	Cluster1
Sec62	Cluster1
Gm813	Cluster1
Cir1	Cluster1
1110012L19Rik	Cluster1
Sdhaf4	Cluster1
Cnpy4	Cluster1
Pakap	Cluster1
Usp30	Cluster1
Gm13715	Cluster1
Gm34397	Cluster1
Oas1d	Cluster1
Popdc2	Cluster1
Nsrp1	Cluster1
Iglc2	Cluster1
Ncald	Cluster1
Celf2	Cluster1
Jkamp	Cluster1
Ralbp1	Cluster1
Aspm	Cluster1
Oog4	Cluster1
Mcub	Cluster1
Fam133b	Cluster1
Itpr2	Cluster1
Rap1a	Cluster1
Ypel5	Cluster1
Caln1	Cluster1
Tmem14c	Cluster1
Sap30	Cluster1
Angptl2	Cluster1
Srek1ip1	Cluster1
2210406O10Rik	Cluster1
Cldn8	Cluster1
Abcb4	Cluster1
Tcstv1	Cluster1
Tmem232	Cluster1
Ooep	Cluster1
Larp7	Cluster1
4930550C14Rik	Cluster1
Mtbp	Cluster1
Syt1	Cluster1
Adgrb3	Cluster1
Gm29183	Cluster1
Ube2cbp	Cluster1
Mxd1	Cluster1
Gtsf2	Cluster1
Dnah14	Cluster1
Gm20548	Cluster1
Cmas	Cluster1
Ptpn22	Cluster1
Fbxw15	Cluster1
Txnip	Cluster1
Nfkbia	Cluster1
Krt12	Cluster1
Gm48538	Cluster1
Gm34728	Cluster1
Zfp957	Cluster1
Fbxw21	Cluster1
Cetn4	Cluster1
Ttc23	Cluster1
Camk2g	Cluster1
Zfp334	Cluster1
Gm5134	Cluster1
Map1b	Cluster1
Mbd3l2	Cluster1
Olfr288	Cluster1
Sepsecs	Cluster1
Brinp3	Cluster1
Plpp1	Cluster1
Spam1	Cluster1
Gm49715	Cluster1
Gspt2	Cluster1
Gm45871	Cluster1
Sfr1	Cluster1
Prpf6	Cluster1
Pcnx	Cluster1
Gm9017	Cluster1
Zar1	Cluster1
Gm20075	Cluster1
Grm4	Cluster1
Cts3	Cluster1
Gm35333	Cluster1
Nprl2	Cluster1
Gm32834	Cluster1
Pou2f1	Cluster1
Gm42945	Cluster1
Zfp3	Cluster1
C8b	Cluster1
Nlrp2	Cluster1
Acox3	Cluster1
Gm42418	Cluster1
Ccdc82	Cluster1
Abcb1b	Cluster1
Kcnn2	Cluster1
Crb1	Cluster1
1700010I14Rik	Cluster1
Ptpre	Cluster1
1600002D24Rik	Cluster1
Gm33301	Cluster1
Vamp3	Cluster1
Egfl6	Cluster1
Gm43479	Cluster1
Ets2	Cluster1
Mlip	Cluster1
Gm49420	Cluster1
R3hdml	Cluster1
Evi2	Cluster1
Elobl	Cluster1
Rora	Cluster1
Hcfc1r1	Cluster1
Tshz1	Cluster1
Gcnt4	Cluster1
Mfsd4b4	Cluster1
Gm13990	Cluster1
Gm14444	Cluster1
Zrsr2	Cluster1
Cacna2d3	Cluster1
Gm32442	Cluster1
Efhc2	Cluster1
Gm30052	Cluster1
Gm12122	Cluster1
Gabrr3	Cluster1
Gm6277	Cluster1
Styk1	Cluster1
Cyp2r1	Cluster1
Tspan12	Cluster1
Gm19757	Cluster1
Gm45272	Cluster1
Gm36159	Cluster1
Calb1	Cluster1
Pdcl3	Cluster1
Ube2d1	Cluster1
Hist1h3f	Cluster1
1700028K03Rik	Cluster1
5830418P13Rik	Cluster1
Rpp25l	Cluster1
AY036118	Cluster1
Epb41l3	Cluster1
Cldn34c1	Cluster1
Lrrtm3	Cluster1
Fgf8	Cluster1
Speer4f2	Cluster1
1700061F12Rik	Cluster1
Osbpl10	Cluster1
Fabp5	Cluster1
Gm13391	Cluster1
Lhfp	Cluster1
Gm11867	Cluster1
Arl13b	Cluster1
Dtwd1	Cluster1
Smurf1	Cluster1
A1bg	Cluster1
Sybu	Cluster1
B930036N10Rik	Cluster1
Aopep	Cluster1
Smc4	Cluster1
Gm42560	Cluster1
Lactb	Cluster1
Nab1	Cluster1
Calr3	Cluster1
Pgbd5	Cluster1
Fdx1	Cluster1
Gm2447	Cluster1
Gm7706	Cluster1
7420701I03Rik	Cluster1
A2ml1	Cluster1
Gm14222	Cluster1
Mocos	Cluster1
E330017A01Rik	Cluster1
Hist2h3c1	Cluster1
Gm15706	Cluster1
Gm19531	Cluster1
Upf3b	Cluster1
Heatr6	Cluster1
C1qb	Cluster1
Gm3587	Cluster1
Atp10b	Cluster1
4921529L05Rik	Cluster1
Ppm1d	Cluster1
Rabl2	Cluster1
Nostrin	Cluster1
Zfp385b	Cluster1
Abcg1	Cluster1
Gpnmb	Cluster1
Gm20483	Cluster1
Stard5	Cluster1
Gm47514	Cluster1
Ccdc174	Cluster1
Sergef	Cluster1
Gm30624	Cluster1
2310033P09Rik	Cluster1
Mettl15	Cluster1
Ddit3	Cluster1
A830036E02Rik	Cluster1
Pcolce2	Cluster1
BC051226	Cluster1
Ankrd50	Cluster1
Gm38326	Cluster1
Thsd4	Cluster1
Stim2	Cluster1
Asgr1	Cluster1
Dpysl5	Cluster1
Hba-a2	Cluster1
Hbb-bs	Cluster1
Epha4	Cluster1
Gm27003	Cluster1
Tnc	Cluster1
Rel	Cluster1
Emp3	Cluster1
Scn8a	Cluster1
Gm12689	Cluster1
Ephx2	Cluster1
Hcfc2	Cluster1
Mospd1	Cluster2
Spin1	Cluster2
Oog1	Cluster2
Cnot3	Cluster2
Nlrp9c	Cluster2
Med28	Cluster2
Tbc1d15	Cluster2
Usp46	Cluster2
Birc3	Cluster2
Zbed3	Cluster2
Gm10436	Cluster2
Trim75	Cluster2
Me1	Cluster2
G6pdx	Cluster2
Gm13752	Cluster2
Ecpas	Cluster2
Chek1	Cluster2
Arhgap20os	Cluster2
Gm50056	Cluster2
Itsn2	Cluster2
Tiparp	Cluster2
Zfp655	Cluster2
Gm2042	Cluster2
Trim61	Cluster2
AA545190	Cluster2
Nsf	Cluster2
C86187	Cluster2
Trps1	Cluster2
Mea1	Cluster2
Bmp5	Cluster2
Phospho2	Cluster2
C87436	Cluster2
Jak1	Cluster2
Kbtbd8	Cluster2
Arl3	Cluster2
A730082K24Rik	Cluster2
Gm1965	Cluster2
Ttk	Cluster2
Snx9	Cluster2
Myl12a	Cluster2
Skp1a	Cluster2
2700049A03Rik	Cluster2
4933427D06Rik	Cluster2
Usp19	Cluster2
Ttc9c	Cluster2
Pcm1	Cluster2
D1Ertd622e	Cluster2
Zfp979	Cluster2
Tada1	Cluster2
Kpna3	Cluster2
Ddx19a	Cluster2
Oog2	Cluster2
Bmi1	Cluster2
Fryl	Cluster2
Meis2	Cluster2
Lyrm4	Cluster2
Kit	Cluster2
Nlrp9b	Cluster2
Ube2i	Cluster2
Dnajc8	Cluster2
Sptbn1	Cluster2
Map2k1	Cluster2
Hmgcs1	Cluster2
Cnot7	Cluster2
Riok1	Cluster2
Uba1	Cluster2
Opa1	Cluster2
Fmnl3	Cluster2
Rttn	Cluster2
Mtus1	Cluster2
Jade2	Cluster2
Acbd3	Cluster2
Tmem60	Cluster2
Fbxw27	Cluster2
Mthfs	Cluster2
Uso1	Cluster2
AC126035.1	Cluster2
Cdc42se2	Cluster2
Gm28557	Cluster2
Pramef12	Cluster2
Ippk	Cluster2
Kif17	Cluster2
Rasa2	Cluster2
C87414	Cluster2
AU022751	Cluster2
Mcur1	Cluster2
Usp28	Cluster2
Akap10	Cluster2
Pabpc1l	Cluster2
Skap1	Cluster2
Mdm4	Cluster2
Syce2	Cluster2
Polr2g	Cluster2
Umodl1	Cluster2
Plag1	Cluster2
Golga5	Cluster2
B4galt4	Cluster2
Nsun4	Cluster2
Nedd1	Cluster2
Wee2	Cluster2
Dcaf8	Cluster2
Gm17751	Cluster2
Bik	Cluster2
Fyn	Cluster2
Nlrp5	Cluster2
Gckr	Cluster2
Gm42980	Cluster2
Lsm14a	Cluster2
Ifitm6	Cluster2
Gbf1	Cluster2
Taf9b	Cluster2
Zfp108	Cluster2
Esr2	Cluster2
Fam117b	Cluster2
Tgfb2	Cluster2
Rph3a	Cluster2
Tmem117	Cluster2
Gm2117	Cluster2
Hivep1	Cluster2
Sin3a	Cluster2
Gm48677	Cluster2
Bbs9	Cluster2
Setdb1	Cluster2
Tnpo1	Cluster2
Mapk3	Cluster2
Ipo8	Cluster2
Akirin2	Cluster2
Akap7	Cluster2
Zfp69	Cluster2
Xlr3a	Cluster2
Myo5b	Cluster2
Dnajc14	Cluster2
Anxa7	Cluster2
Tiam1	Cluster2
AC163611.2	Cluster2
Dennd6a	Cluster2
Cdr2	Cluster2
Spry4	Cluster2
Rrm2b	Cluster2
Ppme1	Cluster2
Dazap2	Cluster2
Lmo7	Cluster2
Gm50214	Cluster2
Usp38	Cluster2
Kdm2b	Cluster2
Nlrp9a	Cluster2
Suv39h2	Cluster2
Nlrp4f	Cluster2
Svopl	Cluster2
Hist2h2aa1	Cluster2
Usp15	Cluster2
Patj	Cluster2
Usp9x	Cluster2
Mllt10	Cluster2
Zfp735	Cluster2
Kdm6a	Cluster2
Gm33906	Cluster2
Cdo1	Cluster2
Gm42817	Cluster2
Tac2	Cluster2
Zfp68	Cluster2
Elmod2	Cluster2
Arfgef1	Cluster2
Abi1	Cluster2
Eif4e3	Cluster2
Btf3l4	Cluster2
Spag7	Cluster2
A430033K04Rik	Cluster2
Fmn2	Cluster2
Parp12	Cluster2
Crabp2	Cluster2
Fgd6	Cluster2
Mtss1	Cluster2
Ctnna3	Cluster2
Med15	Cluster2
AU015836	Cluster2
Hnrnpul2	Cluster2
Carmil1	Cluster2
Tent5b	Cluster2
Rpap2	Cluster2
Ncoa4	Cluster2
Gm49292	Cluster2
Desi2	Cluster2
Trafd1	Cluster2
Rhpn2	Cluster2
Xdh	Cluster2
E330021D16Rik	Cluster2
Cenpo	Cluster2
Epb41l2	Cluster2
Msh6	Cluster2
Lrrc28	Cluster2
Slc15a5	Cluster2
Ppip5k2	Cluster2
Map2k4	Cluster2
Gm13084	Cluster2
Cfap97	Cluster2
Ndufab1	Cluster2
Bmp15	Cluster2
Ndufaf4	Cluster2
Pls1	Cluster2
Pkd2l2	Cluster2
6030458C11Rik	Cluster2
Xlr4c	Cluster2
Fbxo43	Cluster2
Tnfaip8	Cluster2
Eed	Cluster2
Heca	Cluster2
Xlr4b	Cluster2
Tmtc1	Cluster2
Picalm	Cluster2
Zfp212	Cluster2
Clvs2	Cluster2
Siah2	Cluster2
Plk4	Cluster2
Klhl8	Cluster2
Dazl	Cluster2
Gm13269	Cluster2
Tbc1d19	Cluster2
Bnc1	Cluster2
Gm6367	Cluster2
Mapre1	Cluster2
Gm13023	Cluster2
Psenen	Cluster2
Fbxo28	Cluster2
Gyg	Cluster2
Akap17b	Cluster2
Ppp3r1	Cluster2
Scml2	Cluster2
Magea10	Cluster2
Eef2k	Cluster2
Dennd4c	Cluster2
Nup88	Cluster2
3110001I22Rik	Cluster2
Slc9b1	Cluster2
Trim13	Cluster2
Lrrc40	Cluster2
Lsm10	Cluster2
Fam160a1	Cluster2
Ranbp9	Cluster2
Chfr	Cluster2
Fam199x	Cluster2
Gm6205	Cluster2
Apod	Cluster2
Rpe	Cluster2
AI987944	Cluster2
Ankrd44	Cluster2
Cnot6l	Cluster2
Ehd4	Cluster2
Olfr976	Cluster2
Ptprr	Cluster2
Melk	Cluster2
Smarca2	Cluster2
Tbl1xr1	Cluster2
Rictor	Cluster2
Nsdhl	Cluster2
Klhl13	Cluster2
Gm13089	Cluster2
Fam193a	Cluster2
Tpgs2	Cluster2
Myt1	Cluster2
Tfap2e	Cluster2
Ss18	Cluster2
Kdm7a	Cluster2
Gm47272	Cluster2
Qser1	Cluster2
Ipcef1	Cluster2
Macrod2	Cluster2
Phf7	Cluster2
Tmem230	Cluster2
Nlrp4e	Cluster2
Msl3	Cluster2
Fancc	Cluster2
Trip12	Cluster2
AW554918	Cluster2
Rbm7	Cluster2
Gm19784	Cluster2
Dclk2	Cluster2
Ttc37	Cluster2
Glis3	Cluster2
Ift80	Cluster2
Gng3	Cluster2
Ptbp2	Cluster2
Farsb	Cluster2
Tbx3os1	Cluster2
Bicd2	Cluster2
Nobox	Cluster2
Tmcc2	Cluster2
Lef1	Cluster2
Dbf4	Cluster2
Pak7	Cluster2
2010001K21Rik	Cluster2
Ttll11	Cluster2
Map9	Cluster2
C2cd5	Cluster2
Arntl2	Cluster2
Mtmr14	Cluster2
Ehf	Cluster2
Pan3	Cluster2
Dcp2	Cluster2
E330011O21Rik	Cluster2
Gm13103	Cluster2
Kpna7	Cluster2
Ampd3	Cluster2
Rb1	Cluster2
Shroom2	Cluster2
Foxo3	Cluster2
Setd4	Cluster2
Pld1	Cluster2
Gm20627	Cluster2
Elavl2	Cluster2
Gm17830	Cluster2
Abhd17b	Cluster2
4933432K03Rik	Cluster2
Ibtk	Cluster2
Uchl1os	Cluster2
Klhdc3	Cluster2
Sbf2	Cluster2
Ahnak	Cluster2
Glcci1	Cluster2
Cs	Cluster2
Ddhd1	Cluster2
Cttnbp2nl	Cluster2
Phf1	Cluster2
Bnc2	Cluster2
Gpr35	Cluster2
Mbtps2	Cluster2
Fmc1	Cluster2
Sfmbt1	Cluster2
Parl	Cluster2
Papss1	Cluster2
Rasa4	Cluster2
4930579D07Rik	Cluster2
Oosp2	Cluster2
Dcun1d1	Cluster2
Crk	Cluster2
Fndc3a	Cluster2
Igsf23	Cluster2
Mmadhc	Cluster2
Yipf6	Cluster2
Eif4e1b	Cluster2
Lcp2	Cluster2
Rassf5	Cluster2
Kif14	Cluster2
Hnmt	Cluster2
Mipep	Cluster2
Duxf3	Cluster2
Adss	Cluster2
Dusp7	Cluster2
Camkmt	Cluster2
Kbtbd7	Cluster2
Plce1	Cluster2
Fam229b	Cluster2
Aldh9a1	Cluster2
C87977	Cluster2
Nlrp14	Cluster2
Rims1	Cluster2
Uba3	Cluster2
Abhd4	Cluster2
Dync1i2	Cluster2
Lama4	Cluster2
Gm11924	Cluster2
Gpr1	Cluster2
Lypd3	Cluster2
Nckap5	Cluster2
Fbxl5	Cluster2
Asz1	Cluster2
Gm20362	Cluster2
Srpk2	Cluster2
Akap12	Cluster2
Wdr1	Cluster2
Hist2h2aa2	Cluster2
Chmp3	Cluster2
Aknad1	Cluster2
Klhdc1	Cluster2
Lyplal1	Cluster2
Mpped1	Cluster2
Olah	Cluster2
Zfp57	Cluster2
Farp1	Cluster2
Apoo	Cluster2
Tcf7	Cluster2
Pdzph1	Cluster2
Stx12	Cluster2
Enox1	Cluster2
Gm14664	Cluster2
AA792892	Cluster2
Car10	Cluster2
Rapgef4	Cluster2
Ralyl	Cluster2
Gkap1	Cluster2
Mthfd2	Cluster2
Enpp5	Cluster2
Slco3a1	Cluster2
Sdcbp	Cluster2
Gnb4	Cluster2
Ywhag	Cluster2
Senp1	Cluster2
Mllt3	Cluster2
Zkscan6	Cluster2
Gstm5	Cluster2
Cpeb1	Cluster2
Lnx2	Cluster2
Rab32	Cluster2
Sec22a	Cluster2
Kdm1b	Cluster2
Tpd52	Cluster2
C87198	Cluster2
Pias1	Cluster2
Ep400	Cluster2
Atp2a2	Cluster2
Nanos2	Cluster2
Abhd18	Cluster2
Rab3gap2	Cluster2
Sema5a	Cluster2
1700018B24Rik	Cluster2
Adk	Cluster2
Izumo1r	Cluster2
AY512915	Cluster2
Nlrp4a	Cluster2
1700030N03Rik	Cluster2
Lipt1	Cluster2
Fpgs	Cluster2
Sytl4	Cluster2
Sec22b	Cluster2
Stk32b	Cluster2
Ninj2	Cluster2
Btbd2	Cluster2
Htr5a	Cluster2
Cpne9	Cluster2
Znfx1	Cluster2
Yeats4	Cluster2
Slc25a15	Cluster2
Acd	Cluster2
Tent5c	Cluster2
Gm31834	Cluster2
Car9	Cluster2
Rab21	Cluster2
4930500H12Rik	Cluster2
Gda	Cluster2
Fpgt	Cluster2
Nup153	Cluster2
Gm15561	Cluster2
Cd36	Cluster2
Rmi1	Cluster2
Gm31717	Cluster2
Trp63	Cluster2
Clint1	Cluster2
Vmn1r112	Cluster2
B020011L13Rik	Cluster2
Gm43348	Cluster2
Il7	Cluster2
Gng12	Cluster2
Cep41	Cluster2
BC023719	Cluster2
Rnf38	Cluster2
Epb41l5	Cluster2
Rnf185	Cluster2
Wdr26	Cluster2
Tdrd12	Cluster2
Kat7	Cluster2
Prr5l	Cluster2
Chd4	Cluster2
Cfap300	Cluster2
Lzts1	Cluster2
Ncoa2	Cluster2
Rgs17	Cluster2
Pate14	Cluster2
Ildr1	Cluster2
Gm47877	Cluster2
Efcab14	Cluster2
Etv1	Cluster2
Tm2d1	Cluster2
Cep83	Cluster2
Lmbr1	Cluster2
Brdt	Cluster2
Dcaf7	Cluster2
1700001L05Rik	Cluster2
Pou4f1	Cluster2
Csmd3	Cluster2
Trim44	Cluster2
Polb	Cluster2
E230016K23Rik	Cluster2
Krt88	Cluster2
Iglc3	Cluster2
E330010L02Rik	Cluster2
Trappc3l	Cluster2
Gm15496	Cluster2
Gm29483	Cluster2
Tdp1	Cluster2
Arntl	Cluster2
Slc4a8	Cluster2
Mapre2	Cluster2
Naa30	Cluster2
Gm48775	Cluster2
Slc35a5	Cluster2
Myo1e	Cluster2
Rps6ka3	Cluster2
D7Ertd443e	Cluster2
Mff	Cluster2
1700049E17Rik1	Cluster2
Rgn	Cluster2
Zfp943	Cluster2
Mrps33	Cluster2
Cd7	Cluster2
C87487	Cluster2
Gm47847	Cluster2
Gm14216	Cluster2
Hsdl2	Cluster2
Bach2	Cluster2
Hpcal1	Cluster2
4930451I11Rik	Cluster2
Cfap53	Cluster2
E330012B07Rik	Cluster2
Gm34045	Cluster2
Mctp2	Cluster2
Phc2	Cluster2
Rundc3b	Cluster2
Spats2	Cluster2
Gm30725	Cluster2
Scg3	Cluster2
Iqgap2	Cluster2
Chst7	Cluster2
Cbfa2t3	Cluster2
Gna14	Cluster2
Samd10	Cluster2
Wrn	Cluster2
Ehbp1	Cluster2
Peak1	Cluster2
Cmtr2	Cluster2
Hook1	Cluster2
Hsd3b7	Cluster2
Cbx2	Cluster2
Maea	Cluster2
Lhx8	Cluster2
Gm34816	Cluster2
Nav2	Cluster2
Ifit1bl2	Cluster2
Rdh11	Cluster2
Gm14820	Cluster2
Rtl8b	Cluster2
Rubcnl	Cluster2
Gm47448	Cluster2
Gm7145	Cluster2
Trappc9	Cluster2
Arhgef11	Cluster2
Dbndd1	Cluster2
Armc10	Cluster2
Gm16497	Cluster2
Calr4	Cluster2
Agps	Cluster2
Gm8075	Cluster2
Mcc	Cluster2
Wdr76	Cluster2
Pla2g4c	Cluster2
Usp3	Cluster2
Pik3cd	Cluster2
Pdzd2	Cluster2
Mmp2	Cluster2
Pnpla8	Cluster2
Wdr82	Cluster2
Limd1	Cluster2
Gm15941	Cluster2
Insm1	Cluster2
Gm38093	Cluster2
Stk3	Cluster2
Evl	Cluster2
Eya1	Cluster2
Cd300lf	Cluster2
Rtl8a	Cluster2
Tti1	Cluster2
Gm1587	Cluster2
Mtus2	Cluster2
Icosl	Cluster2
Gzf1	Cluster2
Map3k21	Cluster2
Htra4	Cluster2
Tafa4	Cluster2
4933417E11Rik	Cluster2
Gm13031	Cluster2
Gm45304	Cluster2
Togaram1	Cluster2
Gnrh1	Cluster2
Arf1	Cluster2
Gm48957	Cluster2
Gm48893	Cluster2
Cnot4	Cluster2
Nfil3	Cluster2
Gm20356	Cluster2
Myo10	Cluster2
Gm22000	Cluster2
Memo1	Cluster2
Mapk8	Cluster2
Rnf220	Cluster2
Copa	Cluster2
Gm36307	Cluster2
Iglj3	Cluster2
Lsp1	Cluster2
Ythdf3	Cluster2
Osbpl8	Cluster2
Zfp654	Cluster2
Rps6ka6	Cluster2
Il1r1	Cluster2
Rfx5	Cluster2
Fam161a	Cluster2
Lmo3	Cluster2
Lingo2	Cluster2
Paip1	Cluster2
Cdk20	Cluster2
Mtmr7	Cluster2
Zbtb46	Cluster2
Hsf2bp	Cluster2
A830008E24Rik	Cluster2
Rsph3b	Cluster2
Rnf5	Cluster2
Gm47432	Cluster2
Gm10226	Cluster2
Slc7a2	Cluster2
Fiz1	Cluster2
3110040M04Rik	Cluster2
Strn	Cluster2
Gm47350	Cluster2
Adcy5	Cluster2
Gpr68	Cluster2
Efcab6	Cluster2
R3hdm4	Cluster2
Daam1	Cluster2
Sgcd	Cluster2
Cpb2	Cluster2
Nek7	Cluster2
Ccne2	Cluster2
4933408N05Rik	Cluster2
Myoz3	Cluster2
Tubb2a	Cluster2
Polm	Cluster2
Hspa4l	Cluster2
Pik3r1	Cluster2
Eif2ak4	Cluster2
Tram1	Cluster2
Arid5b	Cluster2
Akap6	Cluster2
Lbx1	Cluster2
Dnm3	Cluster2
Gm29999	Cluster2
Gm43269	Cluster2
Xlr4a	Cluster2
Tnks	Cluster2
Gpx6	Cluster2
Nrsn1	Cluster2
Qk	Cluster2
Pcgf6	Cluster2
Prkar2b	Cluster2
Coro2b	Cluster2
Ccdc105	Cluster2
Prickle1	Cluster2
Lcmt1	Cluster2
Egfr	Cluster2
Tmem182	Cluster2
Gm43303	Cluster2
Gm36241	Cluster2
Fa2h	Cluster2
Rps6ka5	Cluster2
Ccdc50	Cluster2
Gm15691	Cluster2
Vps13a	Cluster2
Tcf20	Cluster2
Gm36480	Cluster2
Rit2	Cluster2
Fam110c	Cluster2
Myocos	Cluster2
Rab2a	Cluster2
Tcte2	Cluster2
Oas1c	Cluster2
AU021063	Cluster2
Vrtn	Cluster2
Rasgef1b	Cluster2
Mgat4c	Cluster2
Erich5	Cluster2
Itpk1	Cluster2
Ighg3	Cluster2
Klhl28	Cluster2
Bcar3	Cluster2
Gm49755	Cluster2
Spry1	Cluster2
Gm13822	Cluster2
Fam122b	Cluster2
Sorbs2	Cluster2
Tspyl4	Cluster2
Krt84	Cluster2
Plxna4	Cluster2
Fbxo40	Cluster2
Tdrd1	Cluster2
Aig1	Cluster2
Fate1	Cluster2
Gm3924	Cluster2
Fbxw26	Cluster2
Prelp	Cluster2
Mospd2	Cluster2
Etl4	Cluster2
Dph6	Cluster2
BC002059	Cluster2
Dusp18	Cluster2
Slc6a9	Cluster2
Erc2	Cluster2
Scel	Cluster2
5730403I07Rik	Cluster2
Pramef20	Cluster2
AC142100.1	Cluster2
Copz2	Cluster2
Apba1	Cluster2
Gm3143	Cluster2
Gm527	Cluster2
2610001J05Rik	Cluster2
Msrb3	Cluster2
Zfp385a	Cluster2
Gm15507	Cluster2
Gm36431	Cluster2
4930558C23Rik	Cluster2
Gnai1	Cluster2
Pan2	Cluster2
Gm13180	Cluster2
Gm19299	Cluster2
Vwc2	Cluster2
Nr6a1	Cluster2
Olfm1	Cluster2
Mrpl48	Cluster2
Ywhaz	Cluster2
Pnrc1	Cluster2
Scyl2	Cluster2
Bhlhe40	Cluster2
Cntnap1	Cluster2
Zfr	Cluster2
Trp53inp2	Cluster2
Rab3b	Cluster2
Zfp449	Cluster2
Spocd1	Cluster2
Spg20	Cluster2
Tex26	Cluster2
Akap9	Cluster2
Naa11	Cluster2
Rph3al	Cluster2
Serpinb12	Cluster2
Tmem14a	Cluster2
Gm29016	Cluster2
Dpys	Cluster2
Rapgef5	Cluster2
Txndc2	Cluster2
Sh3rf1	Cluster2
Gm20765	Cluster2
Camsap2	Cluster2
Nlgn1	Cluster2
Selp	Cluster2
Cfap47	Cluster2
Prdx2	Cluster2
Gm4566	Cluster2
Plekhg1	Cluster2
Uckl1	Cluster2
Ccser1	Cluster2
Glis1	Cluster2
Nckap1	Cluster2
Gm44196	Cluster2
Il10rb	Cluster2
Pde6d	Cluster2
Grip1os3	Cluster2
Aven	Cluster2
Smco4	Cluster2
C430002N11Rik	Cluster2
BB557941	Cluster2
Midn	Cluster2
Grina	Cluster2
Cdh20	Cluster2
2500002B13Rik	Cluster2
Rras2	Cluster2
Asgr2	Cluster2
Eps8l3	Cluster2
Psmf1	Cluster2
Cdc27	Cluster2
Musk	Cluster2
Sdha	Cluster2
Rnf169	Cluster2
Rassf1	Cluster2
Bet1	Cluster2
Gm34933	Cluster2
Opalin	Cluster2
Sebox	Cluster2
Nudcd3	Cluster2
Itga8	Cluster2
Cox6a2	Cluster2
Gm11827	Cluster2
Lrrcc1	Cluster2
Mb21d2	Cluster2
Sult1d1	Cluster2
Gm44621	Cluster2
Gm40617	Cluster2
Gmpr	Cluster2
Chp1	Cluster2
Mpp5	Cluster2
Zfp383	Cluster2
Gm42880	Cluster2
Rab18	Cluster2
Gm48704	Cluster2
Cage1	Cluster2
Fam149b	Cluster2
Adhfe1	Cluster2
Pde1c	Cluster2
Arxes1	Cluster2
Zbtb33	Cluster2
Cntn6	Cluster2
Sh3rf2	Cluster2
Atg4a	Cluster2
Tox3	Cluster2
Myo6	Cluster2
Gfra4	Cluster2
Dnm1l	Cluster2
Gm17197	Cluster2
Phf6	Cluster2
Ano10	Cluster2
Gm815	Cluster2
Lhpp	Cluster2
Lca5	Cluster2
Hist1h4c	Cluster2
Pdlim2	Cluster2
2810002D19Rik	Cluster2
Samd7	Cluster2
Ceacam20	Cluster2
Zfp111	Cluster2
Slc26a9	Cluster2
Eya4	Cluster2
1300002E11Rik	Cluster2
Cccd201	Cluster2
Ccdc158	Cluster2
Gtf2ird1	Cluster2
Tmem106c	Cluster2
Slc30a3	Cluster2
Acot3	Cluster2
Gabra3	Cluster2
Pdzk1	Cluster2
Rgs12	Cluster2
Ahr	Cluster2
Stat6	Cluster2
Mrtfb	Cluster2
Clip4	Cluster2
Zfp560	Cluster2
Anks4b	Cluster2
Adgrl2	Cluster2
Gm48877	Cluster2
Gm20646	Cluster2
Rab8b	Cluster2
Rnf19b	Cluster2
Gm43950	Cluster2
Arid1b	Cluster2
Lratd1	Cluster2
Gm15767	Cluster2
Zfp946	Cluster2
Gramd1c	Cluster2
Gm42952	Cluster2
Shoc1	Cluster2
Gm35330	Cluster2
Fbp1	Cluster2
Trim30a	Cluster2
Il2rb	Cluster2
Kbtbd8os	Cluster2
Zfp750	Cluster2
Ntpcr	Cluster2
Atxn1	Cluster2
Casp8	Cluster2
Bcas1	Cluster2
Gm43305	Cluster2
Gm47561	Cluster2
Gm11426	Cluster2
Efna5	Cluster2
Gm16249	Cluster2
Oas1f	Cluster2
Zfp951	Cluster2
Fcgbp	Cluster2
Lonrf1	Cluster2
Il23r	Cluster2
Rbl1	Cluster2
Plek	Cluster2
Gm34586	Cluster2
Pik3r3	Cluster2
9430021M05Rik	Cluster2
Zc3h7b	Cluster2
Cast	Cluster2
Epha3	Cluster2
Ina	Cluster2
Necab2	Cluster2
Gm6602	Cluster2
Aldh18a1	Cluster2
Grin2b	Cluster2
Tll1	Cluster2
Nr2e1	Cluster2
Lrriq3	Cluster2
Idi1	Cluster2
2610316D01Rik	Cluster2
Gm8947	Cluster2
Brd7	Cluster2
Ttc6	Cluster2
Hibadh	Cluster2
Gm13346	Cluster2
Rsbn1	Cluster2
Sash1	Cluster2
Tspyl1	Cluster2
Pthlh	Cluster2
Olfr1416	Cluster2
Mrc1	Cluster2
Bag4	Cluster2
Gm44796	Cluster2
Fcho1	Cluster2
Nubpl	Cluster2
Gm48510	Cluster2
Gab2	Cluster2
Echdc1	Cluster2
Sugct	Cluster2
Apbb1	Cluster2
Myh11	Cluster2
Gm6763	Cluster2
Dpp10	Cluster2
Mast4	Cluster2
Phlpp2	Cluster2
Fetub	Cluster2
Patl1	Cluster2
Gm30159	Cluster2
4930579H20Rik	Cluster2
Gm45587	Cluster2
Clec12a	Cluster2
Exoc4	Cluster2
Inpp5b	Cluster2
Sec16b	Cluster2
Myo5a	Cluster2
Triqk	Cluster2
Gm8764	Cluster2
Deptor	Cluster2
Lin28a	Cluster2
Atrnl1	Cluster2
Gm20125	Cluster2
Gm10378	Cluster2
Gm19583	Cluster2
Stxbp4	Cluster2
Golph3l	Cluster2
Arfgef3	Cluster2
Fam217a	Cluster2
Lbp	Cluster2
Sh2d6	Cluster2
Crybg1	Cluster2
Gm10248	Cluster2
Zfp575	Cluster2
Tmc5	Cluster2
Prrg1	Cluster2
Tgfb3	Cluster2
4930593A02Rik	Cluster2
Unc13c	Cluster2
Gm4961	Cluster2
B3gat2	Cluster2
Zfp109	Cluster2
Sox8	Cluster2
Zfp46	Cluster2
Acsl1	Cluster2
Hnrnpa3	Cluster2
Ablim1	Cluster2
Mynn	Cluster2
Cyp2f2	Cluster2
Gm47456	Cluster2
Fyb2	Cluster2
Syt16	Cluster2
Psd3	Cluster2
Gm15446	Cluster2
Axin2	Cluster2
Kbtbd6	Cluster2
Gm14552	Cluster2
Pcdh9	Cluster2
1700116B05Rik	Cluster2
Glrx5	Cluster2
Dpysl3	Cluster2
Gm10637	Cluster2
Kansl1l	Cluster2
Epb41l4a	Cluster2
Ppp1r9b	Cluster2
Tox	Cluster2
Nsun3	Cluster2
Plxnb1	Cluster2
Aplf	Cluster2
Anks1b	Cluster2
Cacna1d	Cluster2
Ramp3	Cluster2
Ss18l1	Cluster2
Ccdc3	Cluster2
Dlat	Cluster2
Stxbp6	Cluster2
Trim15	Cluster2
Cntn1	Cluster2
Zmat4	Cluster2
Itgb3	Cluster2
2010309G21Rik	Cluster2
Tmem255b	Cluster2
Gpr63	Cluster2
AC164084.1	Cluster2
Vmn2r51	Cluster2
Zfp229	Cluster2
Gm45901	Cluster2
Dpy19l1	Cluster2
1700018B08Rik	Cluster2
Gm14004	Cluster2
Ccdc170	Cluster2
Adm2	Cluster2
[truncated: 1,868 more rows]

## Sheet: stage specific isoform
Raw PB ID	Gene name	IsoformID	Isoform type by SQANTI3	Cluster
PB.65239.5	Nlrp4b	Nlrp4b-FL-5	FSM	Cluster1
PB.8164.1	Nup37	Nup37-FL-1	FSM	Cluster1
PB.38237.9	Oosp1	Oosp1-S-9	FSM	Cluster1
PB.56632.6	Tmem128	Tmem128-FL-6	FSM	Cluster1
PB.10817.8	Pttg1	Pttg1-FL-8	FSM	Cluster1
PB.62242.16	Ggct	Ggct-FL-16	FSM	Cluster1
PB.11283.1	Ccdc69	Ccdc69-FL-1	FSM	Cluster1
PB.60941.1	Rpa3	Rpa3-FL-1	FSM	Cluster1
PB.48058.5	Cks1b	Cks1b-FL-5	FSM	Cluster1
PB.31638.77	Sft2d1	Sft2d1-FL-77	FSM	Cluster1
PB.62444.1	Mad2l1	Mad2l1-FL-1	FSM	Cluster1
PB.25648.244	Brix1	Brix1-S-244	FSM	Cluster1
PB.932.5	Unc50	Unc50-FL-5	FSM	Cluster1
PB.68691.1	Lmo1	Lmo1-FL-1	FSM	Cluster1
PB.63042.52	Snrnp27	Snrnp27-FL-52	FSM	Cluster1
PB.17636.4	Ift43	Ift43-FL-4	FSM	Cluster1
PB.22648.1	Nkiras1	Nkiras1-FL-1	FSM	Cluster1
PB.21865.59	Cenph	Cenph-S-59	FSM	Cluster1
PB.16833.32	Lrr1	Lrr1-FL-32	FSM	Cluster1
PB.65203.5	Aurkc	Aurkc-FL-5	FSM	Cluster1
PB.18458.126	Zfyve21	Zfyve21-S-126	FSM	Cluster1
PB.18137.51	Tcl1b2	Tcl1b2-FL-51	FSM	Cluster1
PB.18137.631	Tcl1b4	Tcl1b4-FL-631	FSM	Cluster1
PB.3831.26	Rgs2	Rgs2-FL-26	FSM	Cluster1
PB.6169.3	Trmt11	Trmt11-FL-3	FSM	Cluster1
PB.76995.28	Omt2b	Omt2b-FL-28	FSM	Cluster1
PB.19156.2	Stard3nl	Stard3nl-FL-2	FSM	Cluster1
PB.63789.658	H1foo	H1foo-FL-658	ISM	Cluster1
PB.63789.12	H1foo	H1foo-FL-12	FSM	Cluster1
PB.75736.1	Timm8b	Timm8b-S-1	FSM	Cluster1
PB.47207.4	Commd2	Commd2-FL-4	FSM	Cluster1
PB.42461.50	Nup35	Nup35-FL-50	FSM	Cluster1
PB.40447.2	Commd3	Commd3-S-2	FSM	Cluster1
PB.64411.16	Magohb	Magohb-FL-16	FSM	Cluster1
PB.62242.21	Ggct	Ggct-S-21	FSM	Cluster1
PB.932.9	Unc50	Unc50-FL-9	FSM	Cluster1
PB.76996.5	Omt2a	Omt2a-FL-5	FSM	Cluster1
PB.78078.1084	Fbxw22	Fbxw22-FL-1084	FSM	Cluster1
PB.65130.3	Gm5065	Gm5065-FL-3	NIC	Cluster1
PB.16833.11	Lrr1	Lrr1-FL-11	NNC	Cluster1
PB.71587.10	Neil3	Neil3-FL-10	NIC	Cluster1
PB.57413.7	Srd5a3	Srd5a3-FL-7	FSM	Cluster1
PB.78078.279	Fbxw14	Fbxw14-FL-279	FSM	Cluster1
PB.39490.2	Fbxw4	Fbxw4-FL-2	FSM	Cluster1
PB.18503.1	Siva1	Siva1-FL-1	FSM	Cluster1
PB.43053.1	Immp1l	Immp1l-FL-1	FSM	Cluster1
PB.11637.1	B9d1	B9d1-FL-1	FSM	Cluster1
PB.17628.5	Erg28	Erg28-S-5	FSM	Cluster1
PB.5728.9	Vta1	Vta1-FL-9	FSM	Cluster1
PB.667.31	4931428L18Rik	4931428L18Rik-FL-31	FSM	Cluster1
PB.57084.61	Smim14	Smim14-FL-61	FSM	Cluster1
PB.37664.1	Cdk2ap2	Cdk2ap2-FL-1	FSM	Cluster1
PB.73755.3	Hsbp1	Hsbp1-S-3	FSM	Cluster1
PB.6767.2	Asf1a	Asf1a-FL-2	FSM	Cluster1
PB.21057.12	Med10	Med10-S-12	FSM	Cluster1
PB.17722.19	Ahsa1	Ahsa1-S-19	NIC	Cluster1
PB.63789.16	H1foo	H1foo-FL-16	NIC	Cluster1
PB.73029.1	Nae1	Nae1-FL-1	FSM	Cluster1
PB.69417.7	Bcl7c	Bcl7c-FL-7	ISM	Cluster1
PB.65121.81	Rfpl4	Rfpl4-FL-81	FSM	Cluster1
PB.49630.43	Lamtor3	Lamtor3-FL-43	FSM	Cluster1
PB.19569.2	Gm11381	Gm11381-S-2	NNC	Cluster1
PB.71587.9	Neil3	Neil3-FL-9	NIC	Cluster1
PB.44219.2	Snrpb2	Snrpb2-FL-2	FSM	Cluster1
PB.18137.201	Tcl1b1	Tcl1b1-FL-201	FSM	Cluster1
PB.55976.1	Rheb	Rheb-FL-1	FSM	Cluster1
PB.37664.54	Cdk2ap2	Cdk2ap2-FL-54	FSM	Cluster1
PB.26542.2	Med30	Med30-FL-2	FSM	Cluster1
PB.62242.19	Ggct	Ggct-S-19	FSM	Cluster1
PB.61896.30	Cul1	Cul1-S-30	NIC	Cluster1
PB.51317.1	Sec61b	Sec61b-S-1	FSM	Cluster1
PB.44351.4	Nxt1	Nxt1-FL-4	FSM	Cluster1
PB.4493.7	Mgst3	Mgst3-S-7	ISM	Cluster1
PB.43124.9	Ccdc34	Ccdc34-S-9	FSM	Cluster1
PB.42461.128	Nup35	Nup35-FL-128	FSM	Cluster1
PB.20139.2	Ninj1	Ninj1-FL-2	FSM	Cluster1
PB.67492.1	Tm2d3	Tm2d3-S-1	FSM	Cluster1
PB.18141.10	Tcl1	Tcl1-S-10	FSM	Cluster1
PB.34476.2	Dpy30	Dpy30-FL-2	FSM	Cluster1
PB.10306.11	Mdh1	Mdh1-FL-11	FSM	Cluster1
PB.49572.84	Ube2d3	Ube2d3-FL-84	FSM	Cluster1
PB.62862.2	Dguok	Dguok-FL-2	FSM	Cluster1
PB.38237.133	Oosp1	Oosp1-S-133	FSM	Cluster1
PB.11876.7	Tmem107	Tmem107-FL-7	FSM	Cluster1
PB.56420.48	Slbp	Slbp-FL-48	FSM	Cluster1
PB.387.3	Gm28784	Gm28784-S-3	NIC	Cluster1
PB.76637.50	Gtf2a2	Gtf2a2-FL-50	FSM	Cluster1
PB.43301.279	Bub1b	Bub1b-S-279	ISM	Cluster1
PB.30668.5	Arl6	Arl6-FL-5	FSM	Cluster1
PB.75788.44	Arhgap20os	Arhgap20os-S-44	ISM	Cluster1
PB.73739.23	Mphosph6	Mphosph6-FL-23	FSM	Cluster1
PB.40936.41	Med27	Med27-FL-41	NIC	Cluster1
PB.44012.93	Pcna	Pcna-FL-93	FSM	Cluster1
PB.31237.1	Smim11	Smim11-S-1	FSM	Cluster1
PB.19569.4	Gm11381	Gm11381-S-4	NNC	Cluster1
PB.73850.1	1190005I06Rik	1190005I06Rik-S-1	FSM	Cluster1
PB.82037.2	Rbbp7	Rbbp7-FL-2	FSM	Cluster1
PB.59783.8	Abhd11	Abhd11-FL-8	FSM	Cluster1
PB.62125.6	Skap2	Skap2-FL-6	FSM	Cluster1
PB.9120.2	Llph	Llph-FL-2	FSM	Cluster1
PB.58918.53	Tesc	Tesc-FL-53	NIC	Cluster1
PB.43536.3	Serf2	Serf2-FL-3	FSM	Cluster1
PB.11178.6	Zcchc10	Zcchc10-FL-6	FSM	Cluster1
PB.50930.21	Smu1	Smu1-S-21	ISM	Cluster1
PB.76888.1	Bcl2l10	Bcl2l10-FL-1	FSM	Cluster1
PB.26425.6	Eny2	Eny2-S-6	FSM	Cluster1
PB.45537.65	Pfdn4	Pfdn4-S-65	FSM	Cluster1
PB.24547.53	Gm49164	Gm49164-S-53	FSM	Cluster1
PB.18141.6	Tcl1	Tcl1-FL-6	FSM	Cluster1
PB.11283.3	Ccdc69	Ccdc69-FL-3	NNC	Cluster1
PB.62242.62	Ggct	Ggct-FL-62	FSM	Cluster1
PB.63107.72	Hmces	Hmces-FL-72	FSM	Cluster1
PB.75788.47	Arhgap20os	Arhgap20os-S-47	FSM	Cluster1
PB.949.3	Mitd1	Mitd1-FL-3	FSM	Cluster1
PB.42729.8	Ddb2	Ddb2-FL-8	NIC	Cluster1
PB.7094.6	Srgn	Srgn-FL-6	FSM	Cluster1
PB.66535.94	Pdcd2l	Pdcd2l-FL-94	FSM	Cluster1
PB.59393.12	Zfp664	Zfp664-S-12	NNC	Cluster1
PB.44219.22	Snrpb2	Snrpb2-FL-22	FSM	Cluster1
PB.61513.22	Bpgm	Bpgm-FL-22	FSM	Cluster1
PB.67911.10	Sec11a	Sec11a-FL-10	FSM	Cluster1
PB.7000.1	Pcbd1	Pcbd1-FL-1	FSM	Cluster1
PB.21492.1	Cmya5	Cmya5-S-1	ISM	Cluster1
PB.21865.10	Mrps36	Mrps36-FL-10	FSM	Cluster1
PB.18141.3	Tcl1	Tcl1-FL-3	FSM	Cluster1
PB.66058.142	Nlrp9c	Nlrp9c-FL-142	FSM	Cluster1
PB.43301.267	Bub1b	Bub1b-S-267	ISM	Cluster1
PB.30794.6	D16Ertd519e	D16Ertd519e-S-6	FSM	Cluster1
PB.36610.42	C330018D20Rik	C330018D20Rik-S-42	NNC	Cluster1
PB.10770.5	Mat2b	Mat2b-FL-5	FSM	Cluster1
PB.43771.11	Stard7	Stard7-FL-11	FSM	Cluster1
PB.30624.1	Nit2	Nit2-S-1	FSM	Cluster1
PB.45537.161	Pfdn4	Pfdn4-S-161	ISM	Cluster1
PB.10770.2	Mat2b	Mat2b-FL-2	FSM	Cluster1
PB.55976.11	Rheb	Rheb-S-11	NNC	Cluster1
PB.45537.2	Pfdn4	Pfdn4-FL-2	FSM	Cluster1
PB.1924.9	Pecr	Pecr-FL-9	NIC	Cluster1
PB.22258.13	Gm47913	Gm47913-S-13	FSM	Cluster1
PB.33230.14	2310061I04Rik	2310061I04Rik-FL-14	FSM	Cluster1
PB.65121.82	Rfpl4	Rfpl4-FL-82	NIC	Cluster1
PB.65121.80	Rfpl4	Rfpl4-FL-80	FSM	Cluster1
PB.76888.2	Bcl2l10	Bcl2l10-FL-2	FSM	Cluster1
PB.53484.101	Ago3	Ago3-FL-101	NIC	Cluster1
PB.932.2	Unc50	Unc50-S-2	NNC	Cluster1
PB.52600.1	Tmem59	Tmem59-FL-1	FSM	Cluster1
PB.34207.60	Ankrd12	Ankrd12-FL-60	FSM	Cluster1
PB.2210.3	Serpine2	Serpine2-S-3	FSM	Cluster1
PB.12349.12	Ywhae	Ywhae-FL-12	FSM	Cluster1
PB.21057.35	Med10	Med10-FL-35	FSM	Cluster1
PB.38237.8	Oosp1	Oosp1-FL-8	FSM	Cluster1
PB.78639.2	1110059G10Rik	1110059G10Rik-FL-2	FSM	Cluster1
PB.7836.1	Oaz1	Oaz1-S-1	NIC	Cluster1
PB.72540.14	4921524J17Rik	4921524J17Rik-FL-14	FSM	Cluster1
PB.52119.6	C87499	C87499-FL-6	ISM	Cluster1
PB.44.139	Atp6v1h	Atp6v1h-FL-139	NNC	Cluster1
PB.1398.3	Coq10b	Coq10b-S-3	FSM	Cluster1
PB.76995.22	Omt2b	Omt2b-FL-22	FSM	Cluster1
PB.55860.3	Orc5	Orc5-FL-3	FSM	Cluster1
PB.35720.1	Polr2d	Polr2d-S-1	FSM	Cluster1
PB.54725.25	Oog3	Oog3-FL-25	FSM	Cluster1
PB.40602.39	Tbpl2	Tbpl2-S-39	NNC	Cluster1
PB.65121.7	Rfpl4	Rfpl4-FL-7	FSM	Cluster1
PB.51225.3	Exosc3	Exosc3-FL-3	FSM	Cluster1
PB.80128.25	Vma21	Vma21-FL-25	FSM	Cluster1
PB.11283.10	Ccdc69	Ccdc69-S-10	ISM	Cluster1
PB.80335.7	Cmc4	Cmc4-S-7	NIC	Cluster1
PB.3345.3	Fam72a	Fam72a-FL-3	FSM	Cluster1
PB.52925.15	Prdx1	Prdx1-FL-15	FSM	Cluster1
PB.49747.2	Gtf2b	Gtf2b-FL-2	FSM	Cluster1
PB.78078.1085	Fbxw22	Fbxw22-FL-1085	FSM	Cluster1
PB.59260.1	Gm15751	Gm15751-S-1	NNC	Cluster1
PB.73755.5	Hsbp1	Hsbp1-S-5	FSM	Cluster1
PB.82096.22	Siah1b	Siah1b-FL-22	FSM	Cluster1
PB.7960.2	Zfp873	Zfp873-FL-2	FSM	Cluster1
PB.25692.13	Sub1	Sub1-S-13	FSM	Cluster1
PB.24132.8	Ebpl	Ebpl-FL-8	FSM	Cluster1
PB.40936.156	Med27	Med27-FL-156	FSM	Cluster1
PB.10817.9	Pttg1	Pttg1-FL-9	NNC	Cluster1
PB.24677.27	Ccdc122	Ccdc122-S-27	FSM	Cluster1
PB.45537.75	Pfdn4	Pfdn4-S-75	FSM	Cluster1
PB.50930.16	Smu1	Smu1-FL-16	FSM	Cluster1
PB.3147.98	3110009E18Rik	3110009E18Rik-S-98	NNC	Cluster1
PB.23817.5	Haus4	Haus4-FL-5	FSM	Cluster1
PB.62825.81	Pole4	Pole4-FL-81	FSM	Cluster1
PB.77529.11	7420426K07Rik	7420426K07Rik-FL-11	FSM	Cluster1
PB.72395.4	Asf1b	Asf1b-FL-4	FSM	Cluster1
PB.31237.76	Smim11	Smim11-S-76	NNC	Cluster1
PB.73674.1	Cenpn	Cenpn-FL-1	FSM	Cluster1
PB.43301.261	Bub1b	Bub1b-S-261	ISM	Cluster1
PB.72766.37	Lpcat2	Lpcat2-S-37	NNC	Cluster1
PB.10770.6	Mat2b	Mat2b-S-6	ISM	Cluster1
PB.10770.7	Mat2b	Mat2b-FL-7	NIC	Cluster1
PB.42679.43	Fnbp4	Fnbp4-FL-43	NNC	Cluster1
PB.34118.9	Fbxl17	Fbxl17-S-9	NNC	Cluster1
PB.49573.32	Cisd2	Cisd2-S-32	FSM	Cluster1
PB.75772.36	Btg4	Btg4-FL-36	NNC	Cluster1
PB.38829.10	Mbl2	Mbl2-FL-10	NNC	Cluster1
PB.74746.38	Ubl5	Ubl5-S-38	FSM	Cluster1
PB.38237.4	Oosp1	Oosp1-S-4	FSM	Cluster1
PB.74934.38	Anln	Anln-S-38	NNC	Cluster1
PB.38237.143	Oosp1	Oosp1-FL-143	FSM	Cluster1
PB.71626.1	Fbxo8	Fbxo8-FL-1	FSM	Cluster1
PB.39176.3	Pdlim1	Pdlim1-FL-3	FSM	Cluster1
PB.7094.3	Srgn	Srgn-FL-3	NIC	Cluster1
PB.38075.7	Slc3a2	Slc3a2-FL-7	NNC	Cluster1
PB.70453.8	Coprs	Coprs-S-8	FSM	Cluster1
PB.62833.48	Pcgf1	Pcgf1-FL-48	NIC	Cluster1
PB.78540.79	Ctnnb1	Ctnnb1-S-79	FSM	Cluster1
PB.61087.15	St7	St7-FL-15	NIC	Cluster1
PB.200.6	Prex2	Prex2-FL-6	FSM	Cluster1
PB.49397.10	Gm42650	Gm42650-S-10	FSM	Cluster1
PB.20278.15	Auh	Auh-FL-15	FSM	Cluster1
PB.45537.3	Pfdn4	Pfdn4-FL-3	FSM	Cluster1
PB.41077.5	Tor1a	Tor1a-FL-5	NNC	Cluster1
PB.33691.7	Taf8	Taf8-S-7	FSM	Cluster1
PB.43501.1	Ccndbp1	Ccndbp1-S-1	FSM	Cluster1
PB.7445.3	Pcdh15	Pcdh15-S-3	NNC	Cluster1
PB.67995.30	A530021J07Rik	A530021J07Rik-S-30	NNC	Cluster1
PB.61422.91	Cpa1	Cpa1-S-91	ISM	Cluster1
PB.22845.24	E330034G19Rik	E330034G19Rik-FL-24	NIC	Cluster1
PB.18141.1	Tcl1	Tcl1-FL-1	FSM	Cluster1
PB.23034.2	Selenok	Selenok-S-2	FSM	Cluster1
PB.51956.1	Lurap1l	Lurap1l-FL-1	FSM	Cluster1
PB.61907.21	Ezh2	Ezh2-S-21	ISM	Cluster1
PB.71224.1	Tusc3	Tusc3-FL-1	FSM	Cluster1
PB.21741.2	Tmem171	Tmem171-FL-2	NNC	Cluster1
PB.65203.2	Aurkc	Aurkc-FL-2	FSM	Cluster1
PB.42040.2	Phospho2	Phospho2-FL-2	FSM	Cluster1
PB.58041.2	Plac8	Plac8-FL-2	FSM	Cluster1
PB.51716.5	Cdc26	Cdc26-S-5	FSM	Cluster1
PB.44012.48	Tmem230	Tmem230-FL-48	FSM	Cluster1
PB.18137.205	Tcl1b1	Tcl1b1-FL-205	FSM	Cluster1
PB.24011.2	Cryl1	Cryl1-FL-2	FSM	Cluster1
PB.76878.2	Arpp19	Arpp19-S-2	FSM	Cluster1
PB.48880.4	Cept1	Cept1-FL-4	FSM	Cluster1
PB.52123.2	Klhl9	Klhl9-S-2	FSM	Cluster1
PB.69316.117	Hirip3	Hirip3-S-117	NIC	Cluster1
PB.70812.8	Lsm1	Lsm1-S-8	NIC	Cluster1
PB.20140.20	Susd3	Susd3-S-20	FSM	Cluster1
PB.667.23	4931428L18Rik	4931428L18Rik-FL-23	FSM	Cluster1
PB.63789.678	H1foo	H1foo-S-678	ISM	Cluster1
PB.21163.7	Pdcd6	Pdcd6-FL-7	FSM	Cluster1
PB.11283.7	Ccdc69	Ccdc69-FL-7	ISM	Cluster1
PB.43301.285	Bub1b	Bub1b-S-285	ISM	Cluster1
PB.18458.125	Zfyve21	Zfyve21-S-125	FSM	Cluster1
PB.6767.6	Asf1a	Asf1a-FL-6	FSM	Cluster1
PB.82037.503	Rbbp7	Rbbp7-S-503	ISM	Cluster1
PB.62825.28	Pole4	Pole4-FL-28	FSM	Cluster1
PB.24578.7	Gm15629	Gm15629-S-7	FSM	Cluster1
PB.61422.69	Cpa1	Cpa1-FL-69	NIC	Cluster1
PB.21419.2	Xrcc4	Xrcc4-FL-2	FSM	Cluster1
PB.78528.13	Gm47066	Gm47066-S-13	FSM	Cluster1
PB.48502.25	Cd160	Cd160-FL-25	FSM	Cluster1
PB.55820.72	Lrrc17	Lrrc17-S-72	ISM	Cluster1
PB.49572.19	Ube2d3	Ube2d3-FL-19	FSM	Cluster1
PB.14747.89	H3f3b	H3f3b-FL-89	FSM	Cluster1
PB.4893.47	Acbd3	Acbd3-S-47	ISM	Cluster1
PB.38236.94	Oosp3	Oosp3-S-94	NNC	Cluster1
PB.38236.29	Oosp3	Oosp3-FL-29	FSM	Cluster1
PB.47255.51	Siah2	Siah2-FL-51	FSM	Cluster1
PB.77094.56	Mei4	Mei4-FL-56	NNC	Cluster1
PB.75843.20	Acat1	Acat1-FL-20	FSM	Cluster1
PB.36117.3	Ndfip1	Ndfip1-FL-3	NIC	Cluster1
PB.5074.6	2022-03-02	Marc2-S-6	NNC	Cluster1
PB.16033.86	Lamb1	Lamb1-S-86	ISM	Cluster1
PB.39101.92	Cep55	Cep55-FL-92	ISM	Cluster1
PB.68174.4	Ccdc90b	Ccdc90b-FL-4	FSM	Cluster1
PB.57240.2	Gnpda2	Gnpda2-S-2	FSM	Cluster1
PB.9349.1	Tsfm	Tsfm-FL-1	FSM	Cluster1
PB.69316.119	Hirip3	Hirip3-S-119	FSM	Cluster1
PB.43746.5	Blvra	Blvra-FL-5	NIC	Cluster1
PB.44351.2	Nxt1	Nxt1-FL-2	FSM	Cluster1
PB.31638.6	Mpc1	Mpc1-S-6	NIC	Cluster1
PB.23817.1	Haus4	Haus4-S-1	ISM	Cluster1
PB.41938.1	Cobll1	Cobll1-S-1	ISM	Cluster1
PB.63122.140	Rab7	Rab7-FL-140	FSM	Cluster1
PB.54003.52	Gpn2	Gpn2-S-52	NNC	Cluster1
PB.24926.44	Mzt1	Mzt1-S-44	FSM	Cluster1
PB.39827.11	Dclre1a	Dclre1a-S-11	ISM	Cluster1
PB.61008.10	Gm44129	Gm44129-S-10	FSM	Cluster1
PB.38094.127	Ttc9c	Ttc9c-FL-127	FSM	Cluster1
PB.65203.7	Aurkc	Aurkc-FL-7	FSM	Cluster1
PB.932.22	Unc50	Unc50-FL-22	FSM	Cluster1
PB.20269.27	Diras2	Diras2-FL-27	NNC	Cluster1
PB.51534.3	Ctnnal1	Ctnnal1-FL-3	NNC	Cluster1
PB.53538.40	Tmem35b	Tmem35b-FL-40	FSM	Cluster1
PB.77524.2	Prr23a3	Prr23a3-FL-2	FSM	Cluster1
PB.16033.97	Lamb1	Lamb1-S-97	ISM	Cluster1
PB.68168.10	Dlg2	Dlg2-S-10	NNC	Cluster1
PB.18900.20	Gm47407	Gm47407-S-20	FSM	Cluster1
PB.75788.50	Arhgap20os	Arhgap20os-S-50	FSM	Cluster1
PB.39827.25	Dclre1a	Dclre1a-S-25	ISM	Cluster1
PB.54517.37	Mfap2	Mfap2-S-37	NIC	Cluster1
PB.14652.14	Cd300c	Cd300c-S-14	NNC	Cluster1
PB.33767.4	Dazl	Dazl-FL-4	FSM	Cluster1
PB.49572.390	Ube2d3	Ube2d3-FL-390	FSM	Cluster1
PB.56788.54	5730480H06Rik	5730480H06Rik-FL-54	FSM	Cluster1
PB.45537.68	Pfdn4	Pfdn4-S-68	FSM	Cluster1
PB.35630.82	Fhod3	Fhod3-S-82	ISM	Cluster1
PB.80173.4	Xlr4c	Xlr4c-FL-4	FSM	Cluster1
PB.70340.4	Ing1	Ing1-FL-4	FSM	Cluster1
PB.24578.8	Gm15629	Gm15629-S-8	NNC	Cluster1
PB.80773.36	Tex11	Tex11-FL-36	NNC	Cluster1
PB.12879.7	Dusp14	Dusp14-FL-7	FSM	Cluster1
PB.49498.24	Gm29811	Gm29811-S-24	FSM	Cluster1
PB.11184.66	Gdf9	Gdf9-FL-66	FSM	Cluster1
PB.61513.26	Bpgm	Bpgm-FL-26	NNC	Cluster1
PB.39787.1	Vti1a	Vti1a-S-1	NNC	Cluster1
PB.36610.33	C330018D20Rik	C330018D20Rik-FL-33	NNC	Cluster1
PB.81022.1	Taf9b	Taf9b-FL-1	FSM	Cluster1
PB.59194.180	Rnf34	Rnf34-S-180	ISM	Cluster1
PB.11184.86	Gdf9	Gdf9-FL-86	NNC	Cluster1
PB.9096.27	Grip1os3	Grip1os3-S-27	FSM	Cluster1
PB.5074.4	2022-03-02	Marc2-S-4	FSM	Cluster1
PB.3147.97	3110009E18Rik	3110009E18Rik-FL-97	NNC	Cluster1
PB.43301.238	Bub1b	Bub1b-S-238	ISM	Cluster1
PB.76888.4	Bcl2l10	Bcl2l10-FL-4	NNC	Cluster1
PB.63789.707	H1foo	H1foo-S-707	ISM	Cluster1
PB.73120.2	Nrn1l	Nrn1l-S-2	FSM	Cluster1
PB.6225.5	Zup1	Zup1-FL-5	FSM	Cluster1
PB.48125.50	Creb3l4	Creb3l4-FL-50	FSM	Cluster1
PB.44.176	Atp6v1h	Atp6v1h-FL-176	NNC	Cluster1
PB.16033.83	Lamb1	Lamb1-S-83	ISM	Cluster1
PB.39827.23	Dclre1a	Dclre1a-FL-23	ISM	Cluster1
PB.44.137	Atp6v1h	Atp6v1h-FL-137	NNC	Cluster1
PB.40300.1	Rsu1	Rsu1-FL-1	FSM	Cluster1
PB.56420.47	Slbp	Slbp-S-47	ISM	Cluster1
PB.62095.16	0610033M10Rik	0610033M10Rik-S-16	NNC	Cluster1
PB.26425.4	Eny2	Eny2-FL-4	FSM	Cluster1
PB.38237.197	Oosp1	Oosp1-S-197	FSM	Cluster1
PB.2284.5	Daw1	Daw1-FL-5	NNC	Cluster1
PB.11283.6	Ccdc69	Ccdc69-FL-6	ISM	Cluster1
PB.24149.16	Trim13	Trim13-FL-16	FSM	Cluster1
PB.61422.8	Cpa1	Cpa1-FL-8	FSM	Cluster1
PB.81873.12	Cldn34b2	Cldn34b2-FL-12	NNC	Cluster1
PB.60958.1	Ica1	Ica1-FL-1	FSM	Cluster1
PB.57084.57	Smim14	Smim14-FL-57	FSM	Cluster1
PB.36843.70	Nedd4l	Nedd4l-FL-70	ISM	Cluster1
PB.75900.4	Gm47877	Gm47877-S-4	NNC	Cluster1
PB.73963.1	Pabpn1l	Pabpn1l-FL-1	FSM	Cluster1
PB.16033.99	Lamb1	Lamb1-S-99	ISM	Cluster1
PB.45842.3	Ppp1r3d	Ppp1r3d-S-3	FSM	Cluster1
PB.38889.23	Atad1	Atad1-FL-23	FSM	Cluster1
PB.11701.2	Cenpv	Cenpv-S-2	FSM	Cluster1
PB.1495.7	Nif3l1	Nif3l1-FL-7	ISM	Cluster1
PB.4923.13	9130409I23Rik	9130409I23Rik-FL-13	FSM	Cluster1
PB.38829.15	Mbl2	Mbl2-S-15	NNC	Cluster1
PB.43301.274	Bub1b	Bub1b-S-274	ISM	Cluster1
PB.71626.4	Fbxo8	Fbxo8-FL-4	FSM	Cluster1
PB.63789.39	H1foo	H1foo-FL-39	NNC	Cluster1
PB.54720.24	Gm13084	Gm13084-FL-24	NIC	Cluster1
PB.61513.37	Bpgm	Bpgm-FL-37	NNC	Cluster1
PB.5074.1	2022-03-02	Marc2-S-1	FSM	Cluster1
PB.52119.13	C87499	C87499-FL-13	FSM	Cluster1
PB.32872.7	Hsf2bp	Hsf2bp-FL-7	FSM	Cluster1
PB.67560.77	Lrrc28	Lrrc28-FL-77	FSM	Cluster1
PB.71752.48	Trim61	Trim61-FL-48	NNC	Cluster1
PB.73594.6	Nudt7	Nudt7-FL-6	FSM	Cluster1
PB.38237.108	Oosp1	Oosp1-S-108	ISM	Cluster1
PB.36268.4	Dcp2	Dcp2-S-4	FSM	Cluster1
PB.35066.5	Mtpap	Mtpap-FL-5	FSM	Cluster1
PB.24983.3	Uchl3	Uchl3-FL-3	FSM	Cluster1
PB.10770.10	Mat2b	Mat2b-FL-10	NNC	Cluster1
PB.14747.65	H3f3b	H3f3b-FL-65	FSM	Cluster1
PB.4996.10	Degs1	Degs1-FL-10	FSM	Cluster1
PB.32624.1	Pxt1	Pxt1-FL-1	FSM	Cluster1
PB.68362.1	Spcs2	Spcs2-FL-1	FSM	Cluster1
PB.58918.55	Tesc	Tesc-FL-55	NIC	Cluster1
PB.3376.173	Slc45a3	Slc45a3-FL-173	ISM	Cluster1
PB.16217.13	Ifrd1	Ifrd1-FL-13	NIC	Cluster1
PB.72530.2	Orc6	Orc6-FL-2	FSM	Cluster1
PB.16033.91	Lamb1	Lamb1-S-91	ISM	Cluster1
PB.78078.1441	Fbxw19	Fbxw19-FL-1441	NIC	Cluster1
PB.57729.52	Rchy1	Rchy1-FL-52	FSM	Cluster1
PB.41507.16	Lrp1b	Lrp1b-FL-16	FSM	Cluster1
PB.3147.3	3110009E18Rik	3110009E18Rik-S-3	FSM	Cluster1
PB.75772.416	Btg4	Btg4-S-416	ISM	Cluster1
PB.73739.12	Mphosph6	Mphosph6-FL-12	NNC	Cluster1
PB.64467.18	Borcs5	Borcs5-FL-18	FSM	Cluster1
PB.71975.4	Arrdc2	Arrdc2-S-4	FSM	Cluster1
PB.50277.19	Ccne2	Ccne2-FL-19	FSM	Cluster1
PB.40936.155	Med27	Med27-FL-155	NIC	Cluster1
PB.82037.466	Rbbp7	Rbbp7-S-466	ISM	Cluster1
PB.43746.1	Blvra	Blvra-FL-1	NIC	Cluster1
PB.38237.10	Oosp1	Oosp1-S-10	ISM	Cluster1
PB.21865.176	Ccnb1	Ccnb1-FL-176	FSM	Cluster1
PB.10396.26	Pex13	Pex13-FL-26	FSM	Cluster1
PB.77094.55	Mei4	Mei4-S-55	NNC	Cluster1
PB.51728.2	Pole3	Pole3-FL-2	FSM	Cluster1
PB.82037.367	Rbbp7	Rbbp7-FL-367	ISM	Cluster1
PB.49283.75	Usp53	Usp53-S-75	ISM	Cluster1
PB.65239.78	Nlrp4b	Nlrp4b-S-78	ISM	Cluster1
PB.79346.1	Gm7437	Gm7437-S-1	NNC	Cluster1
PB.71224.23	Tusc3	Tusc3-FL-23	FSM	Cluster1
PB.16836.148	Klhdc2	Klhdc2-FL-148	FSM	Cluster1
PB.52119.5	C87499	C87499-FL-5	FSM	Cluster1
PB.9249.17	Rxylt1	Rxylt1-FL-17	FSM	Cluster1
PB.70709.105	Plat	Plat-S-105	ISM	Cluster1
PB.74727.36	Zfp560	Zfp560-S-36	FSM	Cluster1
PB.11184.129	Gdf9	Gdf9-FL-129	NNC	Cluster1
PB.16033.95	Lamb1	Lamb1-FL-95	ISM	Cluster1
PB.19939.48	Mcur1	Mcur1-S-48	ISM	Cluster1
PB.62242.18	Ggct	Ggct-FL-18	NIC	Cluster1
PB.79342.5	E330016L19Rik	E330016L19Rik-S-5	FSM	Cluster1
PB.12879.2	Dusp14	Dusp14-FL-2	FSM	Cluster1
PB.21741.4	Tmem171	Tmem171-S-4	NNC	Cluster1
PB.43746.4	Blvra	Blvra-FL-4	NIC	Cluster1
PB.21865.3	Mrps36	Mrps36-S-3	FSM	Cluster1
PB.46846.1	Slc25a31	Slc25a31-FL-1	FSM	Cluster1
PB.24437.1	Bin3	Bin3-FL-1	FSM	Cluster1
PB.50930.17	Smu1	Smu1-S-17	ISM	Cluster1
PB.62862.1	Dguok	Dguok-FL-1	FSM	Cluster1
PB.64699.30	D6Ertd474e	D6Ertd474e-S-30	FSM	Cluster1
PB.37664.58	Cdk2ap2	Cdk2ap2-S-58	NIC	Cluster1
PB.81873.10	Cldn34b2	Cldn34b2-FL-10	NNC	Cluster1
PB.7983.1	1190007I07Rik	1190007I07Rik-S-1	FSM	Cluster1
PB.80817.1	Cxcr3	Cxcr3-FL-1	FSM	Cluster1
PB.57282.1	AU023070	AU023070-S-1	FSM	Cluster1
PB.29599.3	Eif4a2	Eif4a2-FL-3	FSM	Cluster1
PB.82037.453	Rbbp7	Rbbp7-S-453	ISM	Cluster1
PB.69675.105	Edrf1	Edrf1-S-105	ISM	Cluster1
PB.43301.216	Bub1b	Bub1b-S-216	ISM	Cluster1
PB.80335.2	Cmc4	Cmc4-S-2	FSM	Cluster1
PB.34383.87	Ndc80	Ndc80-FL-87	FSM	Cluster1
PB.49630.120	Lamtor3	Lamtor3-S-120	FSM	Cluster1
PB.75917.61	Nrg4	Nrg4-S-61	NNC	Cluster1
PB.44292.16	Naa20	Naa20-FL-16	FSM	Cluster1
PB.78340.9	Stt3b	Stt3b-S-9	ISM	Cluster1
PB.18137.71	Tcl1b2	Tcl1b2-FL-71	NNC	Cluster1
PB.62641.1	Tmem150a	Tmem150a-FL-1	FSM	Cluster1
PB.43301.258	Bub1b	Bub1b-S-258	ISM	Cluster1
PB.56788.6	5730480H06Rik	5730480H06Rik-FL-6	NIC	Cluster1
PB.26542.44	Med30	Med30-S-44	NNC	Cluster1
PB.69675.93	Edrf1	Edrf1-S-93	ISM	Cluster1
PB.50044.39	Cth	Cth-S-39	FSM	Cluster1
PB.39760.14	Bbip1	Bbip1-S-14	FSM	Cluster1
PB.23054.196	Dcp1a	Dcp1a-S-196	ISM	Cluster1
PB.74944.74	Bbs9	Bbs9-FL-74	NNC	Cluster1
PB.26109.1	Laptm4b	Laptm4b-FL-1	FSM	Cluster1
PB.45153.10	Pcif1	Pcif1-S-10	FSM	Cluster1
PB.54849.12	Zfp979	Zfp979-FL-12	FSM	Cluster1
PB.55129.5	Camta1	Camta1-FL-5	FSM	Cluster1
PB.71587.21	Neil3	Neil3-FL-21	NIC	Cluster1
PB.28460.3	Bin2	Bin2-FL-3	FSM	Cluster1
PB.47532.5	Nmd3	Nmd3-FL-5	FSM	Cluster1
PB.16219.16	Zfp277	Zfp277-FL-16	NNC	Cluster1
PB.19932.13	Ranbp9	Ranbp9-FL-13	ISM	Cluster1
PB.50802.4	Slc35a1	Slc35a1-FL-4	FSM	Cluster1
PB.52885.44	Pomgnt1	Pomgnt1-S-44	NNC	Cluster1
PB.29916.10	Muc4	Muc4-FL-10	NIC	Cluster1
PB.31237.45	Smim11	Smim11-S-45	NNC	Cluster1
PB.39827.12	Dclre1a	Dclre1a-FL-12	FSM	Cluster1
PB.14747.16	H3f3b	H3f3b-S-16	ISM	Cluster1
PB.31317.4	Pigp	Pigp-S-4	FSM	Cluster1
PB.78528.14	Gm47066	Gm47066-S-14	FSM	Cluster1
PB.49572.16	Ube2d3	Ube2d3-FL-16	FSM	Cluster1
PB.28052.63	Yaf2	Yaf2-FL-63	NNC	Cluster1
PB.51285.162	Anp32b	Anp32b-S-162	ISM	Cluster1
PB.36117.84	Ndfip1	Ndfip1-S-84	ISM	Cluster1
PB.80142.3	Magea10	Magea10-FL-3	FSM	Cluster1
PB.60388.7	Bri3	Bri3-FL-7	FSM	Cluster1
PB.17636.78	Ift43	Ift43-S-78	FSM	Cluster1
PB.78404.173	Itga9	Itga9-S-173	ISM	Cluster1
PB.40936.235	Med27	Med27-S-235	ISM	Cluster1
PB.57284.7	Nfxl1	Nfxl1-S-7	ISM	Cluster1
PB.21590.5	Zbed3	Zbed3-FL-5	FSM	Cluster1
PB.78078.300	Fbxw14	Fbxw14-S-300	ISM	Cluster1
PB.11124.10	Skp1a	Skp1a-FL-10	FSM	Cluster1
PB.17048.4	Tmem30b	Tmem30b-S-4	FSM	Cluster1
PB.34146.96	AU016765	AU016765-S-96	NIC	Cluster1
PB.63789.25	H1foo	H1foo-S-25	NIC	Cluster1
PB.49279.2	1810037I17Rik	1810037I17Rik-S-2	FSM	Cluster1
PB.56420.57	Slbp	Slbp-FL-57	NIC	Cluster1
PB.77998.118	Usp19	Usp19-FL-118	ISM	Cluster1
PB.52119.9	C87499	C87499-FL-9	NIC	Cluster1
PB.76244.16	Kif23	Kif23-S-16	NIC	Cluster1
PB.61907.24	Ezh2	Ezh2-S-24	ISM	Cluster1
PB.61896.61	Cul1	Cul1-FL-61	NIC	Cluster1
PB.65094.13	Nat14	Nat14-FL-13	ISM	Cluster1
PB.5824.8	Pex7	Pex7-FL-8	FSM	Cluster1
PB.65203.185	Aurkc	Aurkc-S-185	ISM	Cluster1
PB.40936.47	Med27	Med27-FL-47	NIC	Cluster1
PB.4996.12	Degs1	Degs1-S-12	ISM	Cluster1
PB.50099.4	Mos	Mos-FL-4	FSM	Cluster1
PB.51103.1	Arhgef39	Arhgef39-FL-1	FSM	Cluster1
PB.12563.14	Sdf2	Sdf2-FL-14	NNC	Cluster1
PB.2188.115	Acsl3	Acsl3-S-115	NNC	Cluster1
PB.16839.39	Pole2	Pole2-FL-39	FSM	Cluster1
PB.16033.80	Lamb1	Lamb1-S-80	ISM	Cluster1
PB.73674.264	Cenpn	Cenpn-S-264	NNC	Cluster1
PB.73674.269	Cenpn	Cenpn-S-269	ISM	Cluster1
PB.17722.2	Ahsa1	Ahsa1-FL-2	NIC	Cluster1
PB.43301.253	Bub1b	Bub1b-S-253	ISM	Cluster1
PB.38236.14	Oosp3	Oosp3-FL-14	FSM	Cluster1
PB.11637.31	B9d1	B9d1-S-31	NNC	Cluster1
PB.15365.2	Gm32442	Gm32442-FL-2	FSM	Cluster1
PB.26414.21	Tmem74	Tmem74-FL-21	FSM	Cluster1
PB.28457.1	Dazap2	Dazap2-FL-1	FSM	Cluster1
PB.71752.45	Trim61	Trim61-FL-45	FSM	Cluster1
PB.73029.4	Nae1	Nae1-FL-4	FSM	Cluster1
PB.49268.14	Bcar3	Bcar3-FL-14	FSM	Cluster1
PB.2181.26	Farsb	Farsb-FL-26	FSM	Cluster1
PB.12879.6	Dusp14	Dusp14-FL-6	NNC	Cluster1
PB.21163.11	Pdcd6	Pdcd6-FL-11	NNC	Cluster1
PB.59194.19	Rnf34	Rnf34-FL-19	FSM	Cluster1
PB.21865.173	Ccnb1	Ccnb1-S-173	FSM	Cluster1
PB.74588.2	Izumo1r	Izumo1r-S-2	FSM	Cluster1
PB.55976.10	Rheb	Rheb-S-10	NNC	Cluster1
PB.3147.178	3110009E18Rik	3110009E18Rik-S-178	ISM	Cluster1
PB.28052.64	Yaf2	Yaf2-S-64	NNC	Cluster1
PB.71102.1	Saraf	Saraf-FL-1	FSM	Cluster1
PB.49835.4	Ctbs	Ctbs-FL-4	FSM	Cluster1
PB.8833.43	Tbc1d15	Tbc1d15-FL-43	ISM	Cluster1
PB.36360.2	Ap3s1	Ap3s1-S-2	FSM	Cluster1
PB.61663.18	Fmc1	Fmc1-FL-18	FSM	Cluster1
PB.34146.131	AU016765	AU016765-S-131	ISM	Cluster1
PB.49572.74	Ube2d3	Ube2d3-FL-74	FSM	Cluster1
PB.54614.49	Rsc1a1	Rsc1a1-FL-49	FSM	Cluster1
PB.63122.137	Rab7	Rab7-FL-137	FSM	Cluster1
PB.46954.1	1700018B24Rik	1700018B24Rik-FL-1	FSM	Cluster1
PB.25557.52	Wdr70	Wdr70-S-52	FSM	Cluster1
PB.30149.58	Stxbp5l	Stxbp5l-S-58	NNC	Cluster1
PB.80335.19	Cmc4	Cmc4-S-19	FSM	Cluster1
PB.51661.29	Inip	Inip-S-29	NNC	Cluster1
PB.21809.3	Serf1	Serf1-S-3	FSM	Cluster1
PB.78586.6	1700048O20Rik	1700048O20Rik-S-6	FSM	Cluster1
PB.11260.204	Cdc42se2	Cdc42se2-S-204	ISM	Cluster1
PB.63156.7	Mcm2	Mcm2-S-7	ISM	Cluster1
PB.61513.399	Bpgm	Bpgm-FL-399	ISM	Cluster1
PB.78078.285	Fbxw14	Fbxw14-S-285	ISM	Cluster1
PB.73120.12	Nrn1l	Nrn1l-S-12	ISM	Cluster1
PB.70810.5	Plpp5	Plpp5-FL-5	NIC	Cluster1
PB.46136.73	Tpd52	Tpd52-FL-73	FSM	Cluster1
PB.42828.1	Accsl	Accsl-FL-1	FSM	Cluster1
PB.15365.4	Gm32442	Gm32442-S-4	FSM	Cluster1
PB.62825.63	Pole4	Pole4-FL-63	FSM	Cluster1
PB.31807.37	Smoc2	Smoc2-S-37	ISM	Cluster1
PB.49929.18	Dnajb4	Dnajb4-S-18	ISM	Cluster1
PB.25008.97	Gm49292	Gm49292-S-97	ISM	Cluster1
PB.76244.2	Kif23	Kif23-S-2	FSM	Cluster1
PB.45838.12	Zfp931	Zfp931-S-12	FSM	Cluster1
PB.1497.1	Clk1	Clk1-FL-1	FSM	Cluster1
PB.42197.2	6430710C18Rik	6430710C18Rik-S-2	ISM	Cluster1
PB.47363.2	E130311K13Rik	E130311K13Rik-FL-2	FSM	Cluster1
PB.61896.28	Cul1	Cul1-S-28	ISM	Cluster1
PB.44611.4	Mapre1	Mapre1-FL-4	FSM	Cluster1
PB.22325.3	4833420G17Rik	4833420G17Rik-FL-3	NIC	Cluster1
PB.34207.59	Ankrd12	Ankrd12-FL-59	FSM	Cluster1
PB.71257.165	Cnot7	Cnot7-FL-165	FSM	Cluster1
PB.67509.10	Snrpa1	Snrpa1-S-10	FSM	Cluster1
PB.1523.1	Stradb	Stradb-FL-1	FSM	Cluster1
PB.59366.1	Tmed2	Tmed2-FL-1	FSM	Cluster1
PB.67911.59	Sec11a	Sec11a-FL-59	FSM	Cluster1
PB.30624.38	Nit2	Nit2-S-38	FSM	Cluster1
PB.10770.11	Mat2b	Mat2b-S-11	ISM	Cluster1
PB.43159.6	Katnbl1	Katnbl1-FL-6	FSM	Cluster1
PB.41387.3	Rbm18	Rbm18-FL-3	FSM	Cluster1
PB.79435.3	Gm2309	Gm2309-S-3	FSM	Cluster1
PB.21865.179	Ccnb1	Ccnb1-FL-179	FSM	Cluster1
PB.57286.8	Zar1	Zar1-S-8	ISM	Cluster1
PB.75560.15	Arcn1	Arcn1-S-15	ISM	Cluster1
PB.75869.1	Cyp19a1	Cyp19a1-FL-1	NNC	Cluster1
PB.18733.1	Tubal3	Tubal3-FL-1	NIC	Cluster1
PB.13093.102	Smg8	Smg8-S-102	ISM	Cluster1
PB.43835.1	Zc3h8	Zc3h8-FL-1	FSM	Cluster1
PB.20140.21	Susd3	Susd3-S-21	NIC	Cluster1
PB.58057.1	Abraxas1	Abraxas1-FL-1	FSM	Cluster1
PB.82096.21	Siah1b	Siah1b-FL-21	FSM	Cluster1
PB.50930.25	Smu1	Smu1-S-25	ISM	Cluster1
PB.72794.3	Mt4	Mt4-S-3	FSM	Cluster1
PB.65380.64	Obox7	Obox7-S-64	ISM	Cluster1
PB.20140.19	Susd3	Susd3-S-19	NIC	Cluster1
PB.34500.3	Yipf4	Yipf4-FL-3	FSM	Cluster1
PB.667.46	4931428L18Rik	4931428L18Rik-FL-46	FSM	Cluster1
PB.70709.109	Plat	Plat-S-109	ISM	Cluster1
PB.75843.27	Acat1	Acat1-FL-27	ISM	Cluster1
PB.16833.1	Lrr1	Lrr1-FL-1	NNC	Cluster1
PB.48703.7	Sycp1	Sycp1-FL-7	NNC	Cluster1
PB.77677.158	Ryk	Ryk-S-158	NNC	Cluster1
PB.41898.2	Tank	Tank-FL-2	NIC	Cluster1
PB.25213.39	Gpr180	Gpr180-S-39	ISM	Cluster1
PB.69083.84	Mettl9	Mettl9-FL-84	FSM	Cluster1
PB.77677.161	Ryk	Ryk-S-161	NNC	Cluster1
PB.76888.5	Bcl2l10	Bcl2l10-S-5	NNC	Cluster1
PB.41357.32	Stom	Stom-FL-32	FSM	Cluster1
PB.73307.2	D030068K23Rik	D030068K23Rik-FL-2	NNC	Cluster1
PB.37973.18	Ppp1r14b	Ppp1r14b-S-18	FSM	Cluster1
PB.72719.9	Chd9	Chd9-S-9	NNC	Cluster1
PB.82037.514	Rbbp7	Rbbp7-S-514	ISM	Cluster1
PB.11465.49	Arf1	Arf1-FL-49	FSM	Cluster1
PB.44735.4	Edem2	Edem2-FL-4	FSM	Cluster1
PB.48880.8	Cept1	Cept1-FL-8	ISM	Cluster1
PB.52925.6	Prdx1	Prdx1-FL-6	FSM	Cluster1
PB.3912.2	Prg4	Prg4-S-2	ISM	Cluster1
PB.9427.19	Tac2	Tac2-S-19	NNC	Cluster1
PB.43746.47	Blvra	Blvra-S-47	NIC	Cluster1
PB.23054.152	Dcp1a	Dcp1a-S-152	FSM	Cluster1
PB.76332.15	Map2k1	Map2k1-S-15	ISM	Cluster1
PB.54849.6	Zfp979	Zfp979-FL-6	FSM	Cluster1
PB.64699.33	D6Ertd474e	D6Ertd474e-S-33	FSM	Cluster1
PB.57284.8	Nfxl1	Nfxl1-S-8	ISM	Cluster1
PB.52123.4	Klhl9	Klhl9-S-4	FSM	Cluster1
PB.65130.4	Gm5065	Gm5065-FL-4	NNC	Cluster1
PB.49656.1	Adh5	Adh5-FL-1	NNC	Cluster1
PB.78078.715	Fbxw28	Fbxw28-S-715	ISM	Cluster1
PB.33919.80	Uhrf1	Uhrf1-S-80	ISM	Cluster1
PB.5074.3	2022-03-02	Marc2-S-3	FSM	Cluster1
PB.64061.11	Dppa3	Dppa3-FL-11	FSM	Cluster1
PB.72810.2	9330175E14Rik	9330175E14Rik-FL-2	ISM	Cluster1
PB.644.70	Phf3	Phf3-FL-70	FSM	Cluster1
PB.75268.35	Chek1	Chek1-FL-35	FSM	Cluster1
PB.3311.4	Cd55	Cd55-FL-4	FSM	Cluster1
PB.23437.40	Gpr137c	Gpr137c-S-40	FSM	Cluster1
PB.78078.284	Fbxw14	Fbxw14-S-284	ISM	Cluster1
PB.70423.67	Tmco3	Tmco3-FL-67	FSM	Cluster1
PB.3311.3	Cd55	Cd55-S-3	ISM	Cluster1
PB.43517.6	Trp53bp1	Trp53bp1-S-6	NNC	Cluster1
PB.32872.8	Hsf2bp	Hsf2bp-FL-8	FSM	Cluster1
PB.68867.3	Copb1	Copb1-FL-3	ISM	Cluster1
PB.932.131	Unc50	Unc50-S-131	ISM	Cluster1
PB.43301.203	Bub1b	Bub1b-S-203	ISM	Cluster1
PB.39490.6	Fbxw4	Fbxw4-FL-6	NIC	Cluster1
PB.3147.102	3110009E18Rik	3110009E18Rik-S-102	NNC	Cluster1
PB.44735.12	Edem2	Edem2-FL-12	ISM	Cluster1
PB.50930.18	Smu1	Smu1-S-18	ISM	Cluster1
PB.49747.107	Gtf2b	Gtf2b-S-107	ISM	Cluster1
PB.49925.68	Gipc2	Gipc2-S-68	ISM	Cluster1
PB.33690.4	Med20	Med20-FL-4	FSM	Cluster1
PB.1014.25	Tbc1d8	Tbc1d8-S-25	ISM	Cluster1
PB.3436.46	Mdm4	Mdm4-FL-46	NNC	Cluster1
PB.75418.25	Sc5d	Sc5d-FL-25	FSM	Cluster1
PB.43124.3	Ccdc34	Ccdc34-FL-3	FSM	Cluster1
PB.59304.22	Ccdc62	Ccdc62-S-22	NNC	Cluster1
PB.63157.1	Tpra1	Tpra1-FL-1	FSM	Cluster1
PB.26296.3	Gm35167	Gm35167-S-3	NNC	Cluster1
PB.8833.53	Tbc1d15	Tbc1d15-S-53	ISM	Cluster1
PB.61513.32	Bpgm	Bpgm-FL-32	NNC	Cluster1
PB.31555.2	Tmem181a	Tmem181a-FL-2	NNC	Cluster1
PB.39827.8	Dclre1a	Dclre1a-FL-8	ISM	Cluster1
PB.52723.18	Btf3l4	Btf3l4-FL-18	NNC	Cluster1
PB.35826.22	Pkd2l2	Pkd2l2-FL-22	ISM	Cluster1
PB.1497.4	Clk1	Clk1-FL-4	FSM	Cluster1
PB.30668.8	Arl6	Arl6-S-8	ISM	Cluster1
PB.52056.1	Rraga	Rraga-S-1	FSM	Cluster1
PB.6478.28	Cep57l1	Cep57l1-S-28	ISM	Cluster1
PB.40583.44	Mastl	Mastl-S-44	ISM	Cluster1
PB.2895.96	Pign	Pign-FL-96	ISM	Cluster1
PB.37583.28	1700030N03Rik	1700030N03Rik-FL-28	NIC	Cluster1
PB.52008.16	Psip1	Psip1-S-16	ISM	Cluster1
PB.8833.48	Tbc1d15	Tbc1d15-FL-48	ISM	Cluster1
PB.77677.151	Ryk	Ryk-S-151	NNC	Cluster1
PB.61033.13	1110019D14Rik	1110019D14Rik-FL-13	FSM	Cluster1
PB.45115.3	Tomm34	Tomm34-FL-3	FSM	Cluster1
PB.61896.24	Cul1	Cul1-FL-24	NIC	Cluster1
PB.57413.23	Srd5a3	Srd5a3-FL-23	FSM	Cluster1
PB.20629.160	Naa35	Naa35-FL-160	ISM	Cluster1
PB.71587.14	Neil3	Neil3-S-14	ISM	Cluster1
PB.80335.1	Cmc4	Cmc4-S-1	FSM	Cluster1
PB.37497.177	Fbxo15	Fbxo15-S-177	NNC	Cluster1
PB.25339.4	Tm9sf2	Tm9sf2-FL-4	FSM	Cluster1
PB.6478.27	Cep57l1	Cep57l1-FL-27	NNC	Cluster1
PB.20860.9	Nlrp4f	Nlrp4f-S-9	ISM	Cluster1
PB.62194.1	Cpvl	Cpvl-S-1	NNC	Cluster1
PB.12039.1	Med11	Med11-FL-1	FSM	Cluster1
PB.71832.1	Gm43263	Gm43263-S-1	FSM	Cluster1
PB.21865.175	Ccnb1	Ccnb1-FL-175	ISM	Cluster1
PB.69738.12	9430038I01Rik	9430038I01Rik-FL-12	FSM	Cluster1
PB.21450.1	Ssbp2	Ssbp2-FL-1	FSM	Cluster1
PB.21865.178	Ccnb1	Ccnb1-S-178	ISM	Cluster1
PB.78078.1110	Fbxw22	Fbxw22-S-1110	ISM	Cluster1
PB.64468.4	Mansc1	Mansc1-FL-4	NNC	Cluster1
PB.22754.4	Gm30108	Gm30108-S-4	FSM	Cluster1
PB.21865.189	Ccnb1	Ccnb1-S-189	ISM	Cluster1
PB.14747.73	H3f3b	H3f3b-FL-73	FSM	Cluster1
PB.63850.151	Hnrnpf	Hnrnpf-FL-151	FSM	Cluster1
PB.26425.15	Eny2	Eny2-S-15	FSM	Cluster1
PB.68853.3	Btbd10	Btbd10-S-3	ISM	Cluster1
PB.4667.202	Dcaf8	Dcaf8-FL-202	ISM	Cluster1
PB.28320.96	Troap	Troap-S-96	ISM	Cluster1
PB.62854.2	Mthfd2	Mthfd2-FL-2	FSM	Cluster1
PB.55362.54	Ccnl2	Ccnl2-FL-54	FSM	Cluster1
PB.2333.35	A530040E14Rik	A530040E14Rik-FL-35	FSM	Cluster1
PB.45537.116	Pfdn4	Pfdn4-FL-116	NNC	Cluster1
PB.42089.2	Gorasp2	Gorasp2-FL-2	NNC	Cluster1
PB.55820.2	Lrrc17	Lrrc17-FL-2	FSM	Cluster1
PB.60820.3	Bet1	Bet1-FL-3	FSM	Cluster1
PB.49933.22	Nexn	Nexn-FL-22	NIC	Cluster1
PB.71257.162	Cnot7	Cnot7-FL-162	FSM	Cluster1
PB.22611.3	Ngly1	Ngly1-FL-3	FSM	Cluster1
PB.38237.3	Oosp1	Oosp1-S-3	ISM	Cluster1
PB.72110.1	Calr3	Calr3-FL-1	NNC	Cluster1
PB.38369.8	Cep78	Cep78-S-8	NNC	Cluster1
PB.33061.12	Ppt2	Ppt2-FL-12	NNC	Cluster1
PB.25692.19	Sub1	Sub1-FL-19	FSM	Cluster1
PB.7834.7	Plekhj1	Plekhj1-S-7	FSM	Cluster1
PB.69675.117	Edrf1	Edrf1-S-117	ISM	Cluster1
PB.57730.53	Uso1	Uso1-S-53	ISM	Cluster1
PB.2722.16	Stk25	Stk25-FL-16	NIC	Cluster1
PB.16033.71	Lamb1	Lamb1-S-71	ISM	Cluster1
PB.76637.40	Gtf2a2	Gtf2a2-FL-40	FSM	Cluster1
PB.68853.7	Btbd10	Btbd10-FL-7	ISM	Cluster1
PB.75482.11	Rnf26	Rnf26-S-11	FSM	Cluster1
PB.42679.44	Fnbp4	Fnbp4-FL-44	NNC	Cluster1
PB.77998.133	Usp19	Usp19-S-133	ISM	Cluster1
PB.42828.16	Accsl	Accsl-FL-16	NIC	Cluster1
PB.50354.5	Triqk	Triqk-FL-5	FSM	Cluster1
PB.22726.9	Anxa7	Anxa7-FL-9	FSM	Cluster1
PB.36974.33	Spire1	Spire1-FL-33	ISM	Cluster1
PB.40602.3	Hnmt	Hnmt-FL-3	NNC	Cluster1
PB.59027.15	Oas1e	Oas1e-S-15	ISM	Cluster1
PB.49573.50	Cisd2	Cisd2-S-50	FSM	Cluster1
PB.27110.4	Fbxl6	Fbxl6-FL-4	FSM	Cluster1
PB.31638.80	Sft2d1	Sft2d1-FL-80	FSM	Cluster1
PB.51661.28	Inip	Inip-S-28	FSM	Cluster1
PB.63363.10	Suclg2	Suclg2-S-10	NNC	Cluster1
PB.60329.1	Kdelr2	Kdelr2-FL-1	FSM	Cluster1
PB.16878.109	Atl1	Atl1-S-109	FSM	Cluster1
PB.70709.101	Plat	Plat-S-101	ISM	Cluster1
PB.61896.354	Cul1	Cul1-FL-354	ISM	Cluster1
PB.56788.178	5730480H06Rik	5730480H06Rik-S-178	ISM	Cluster1
PB.56614.21	Gm20052	Gm20052-S-21	FSM	Cluster1
PB.49572.37	Ube2d3	Ube2d3-FL-37	FSM	Cluster1
PB.43517.14	Trp53bp1	Trp53bp1-S-14	ISM	Cluster1
PB.25339.133	Tm9sf2	Tm9sf2-S-133	ISM	Cluster1
PB.71587.26	Neil3	Neil3-S-26	ISM	Cluster1
PB.33740.3	Oard1	Oard1-FL-3	NNC	Cluster1
PB.42828.7	Accsl	Accsl-FL-7	NIC	Cluster1
PB.81380.6	Btk	Btk-S-6	NNC	Cluster1
PB.76920.2	Bmp5	Bmp5-FL-2	NNC	Cluster1
PB.57240.24	Gnpda2	Gnpda2-S-24	FSM	Cluster1
PB.43746.42	Blvra	Blvra-S-42	NIC	Cluster1
PB.56788.159	5730480H06Rik	5730480H06Rik-S-159	ISM	Cluster1
PB.44.171	Atp6v1h	Atp6v1h-FL-171	NNC	Cluster1
PB.60393.15	Baiap2l1	Baiap2l1-S-15	ISM	Cluster1
PB.52849.20	Cmpk1	Cmpk1-S-20	FSM	Cluster1
PB.51705.2	Slc31a2	Slc31a2-FL-2	FSM	Cluster1
PB.64699.32	D6Ertd474e	D6Ertd474e-S-32	FSM	Cluster1
PB.79814.1	Plac1	Plac1-FL-1	FSM	Cluster1
PB.66108.17	Sertad3	Sertad3-FL-17	FSM	Cluster1
PB.2333.40	A530040E14Rik	A530040E14Rik-FL-40	FSM	Cluster1
PB.5471.19	Rgs17	Rgs17-FL-19	FSM	Cluster1
PB.43746.13	Blvra	Blvra-S-13	NIC	Cluster1
PB.55497.17	Steap2	Steap2-S-17	FSM	Cluster1
PB.49660.68	Eif4e	Eif4e-S-68	FSM	Cluster1
PB.57284.3	Nfxl1	Nfxl1-S-3	FSM	Cluster1
PB.49397.1	Gm42650	Gm42650-S-1	NNC	Cluster1
PB.62601.6	Mrpl35	Mrpl35-FL-6	FSM	Cluster1
PB.58046.3	Hpse	Hpse-FL-3	NNC	Cluster1
PB.77419.2	Atp1b3	Atp1b3-FL-2	FSM	Cluster1
PB.22772.91	Ap3m1	Ap3m1-FL-91	NIC	Cluster1
PB.57752.2	Nup54	Nup54-FL-2	FSM	Cluster1
PB.60889.4	Gm20617	Gm20617-S-4	FSM	Cluster1
PB.9663.3	Rnf185	Rnf185-FL-3	FSM	Cluster1
PB.78078.688	Fbxw28	Fbxw28-S-688	ISM	Cluster1
PB.65071.17	Cox6b2	Cox6b2-S-17	FSM	Cluster1
PB.22178.36	Plpp1	Plpp1-FL-36	NNC	Cluster1
PB.66057.5	Nlrp9a	Nlrp9a-FL-5	FSM	Cluster1
PB.68711.15	Tmem9b	Tmem9b-FL-15	FSM	Cluster1
PB.42197.1	6430710C18Rik	6430710C18Rik-S-1	NNC	Cluster1
PB.45537.165	Pfdn4	Pfdn4-S-165	ISM	Cluster1
PB.81656.2	Gm15091	Gm15091-S-2	NNC	Cluster1
PB.48434.3	Gm20627	Gm20627-S-3	NNC	Cluster1
PB.75793.4	Rdx	Rdx-S-4	FSM	Cluster1
PB.77760.2	Mrpl3	Mrpl3-FL-2	FSM	Cluster1
PB.9409.11	Shmt2	Shmt2-FL-11	ISM	Cluster1
PB.10396.30	Pex13	Pex13-S-30	ISM	Cluster1
PB.16878.1	Atl1	Atl1-FL-1	NIC	Cluster1
PB.43517.13	Trp53bp1	Trp53bp1-S-13	ISM	Cluster1
PB.66058.143	Nlrp9c	Nlrp9c-FL-143	NIC	Cluster1
PB.69639.3	Oat	Oat-FL-3	FSM	Cluster1
PB.6924.41	Mcu	Mcu-FL-41	ISM	Cluster1
PB.55570.2	Tmem243	Tmem243-FL-2	FSM	Cluster1
PB.61422.83	Cpa1	Cpa1-S-83	ISM	Cluster1
PB.39850.4	Afap1l2	Afap1l2-S-4	ISM	Cluster1
PB.48058.8	Cks1b	Cks1b-S-8	FSM	Cluster1
PB.23951.3	Rnf17	Rnf17-FL-3	FSM	Cluster1
PB.40583.56	Mastl	Mastl-FL-56	FSM	Cluster1
PB.51647.61	Hsdl2	Hsdl2-S-61	ISM	Cluster1
PB.56632.2	Tmem128	Tmem128-FL-2	FSM	Cluster1
PB.21316.10	Cetn3	Cetn3-FL-10	FSM	Cluster1
PB.32404.1	Dusp1	Dusp1-FL-1	FSM	Cluster1
PB.29368.26	Iglv1	Iglv1-S-26	NNC	Cluster1
PB.50789.36	Akirin2	Akirin2-FL-36	FSM	Cluster1
PB.63789.60	H1foo	H1foo-FL-60	FSM	Cluster1
PB.40936.56	Med27	Med27-FL-56	NIC	Cluster1
PB.43686.1	Dtwd1	Dtwd1-S-1	FSM	Cluster1
PB.75224.2	Rpusd4	Rpusd4-FL-2	FSM	Cluster1
PB.4996.71	Degs1	Degs1-FL-71	FSM	Cluster1
PB.59565.1	Nipsnap2	Nipsnap2-FL-1	FSM	Cluster1
PB.29104.2	Fopnl	Fopnl-FL-2	FSM	Cluster1
PB.23054.151	Dcp1a	Dcp1a-S-151	ISM	Cluster1
PB.50295.3	Esrp1	Esrp1-S-3	NIC	Cluster1
PB.30899.76	E330011O21Rik	E330011O21Rik-S-76	ISM	Cluster1
PB.80597.8	Pdk3	Pdk3-FL-8	FSM	Cluster1
PB.13093.21	Gdpd1	Gdpd1-FL-21	FSM	Cluster1
PB.51103.10	Arhgef39	Arhgef39-FL-10	NNC	Cluster1
PB.17278.10	Rdh12	Rdh12-FL-10	FSM	Cluster1
PB.932.135	Unc50	Unc50-FL-135	ISM	Cluster1
PB.20269.13	Diras2	Diras2-FL-13	FSM	Cluster1
PB.7555.1	Prmt2	Prmt2-FL-1	FSM	Cluster1
PB.1345.1	Ormdl1	Ormdl1-FL-1	FSM	Cluster1
PB.23156.2	Ncoa4	Ncoa4-FL-2	FSM	Cluster1
PB.78340.3	Stt3b	Stt3b-S-3	ISM	Cluster1
PB.5869.4	Hbs1l	Hbs1l-FL-4	FSM	Cluster1
PB.23514.14	Gch1	Gch1-FL-14	FSM	Cluster1
PB.8531.37	B530045E10Rik	B530045E10Rik-S-37	NNC	Cluster1
PB.29298.5	Zdhhc8	Zdhhc8-S-5	ISM	Cluster1
PB.29262.3	Ccdc74a	Ccdc74a-S-3	FSM	Cluster1
PB.57286.7	Zar1	Zar1-FL-7	FSM	Cluster1
PB.74035.1	Tubb3	Tubb3-FL-1	FSM	Cluster1
PB.51103.3	Arhgef39	Arhgef39-FL-3	ISM	Cluster1
PB.75939.14	Rcn2	Rcn2-S-14	FSM	Cluster1
PB.21316.50	Cetn3	Cetn3-S-50	NIC	Cluster1
PB.4738.1	Opn3	Opn3-FL-1	FSM	Cluster1
PB.73594.7	Nudt7	Nudt7-S-7	FSM	Cluster1
PB.23785.3	Abhd4	Abhd4-S-3	FSM	Cluster1
PB.76691.2	Aqp9	Aqp9-FL-2	NNC	Cluster1
PB.64699.43	D6Ertd474e	D6Ertd474e-S-43	FSM	Cluster1
PB.42089.3	Gorasp2	Gorasp2-FL-3	NNC	Cluster1
PB.65239.144	Nlrp4b	Nlrp4b-S-144	ISM	Cluster1
PB.47896.9	Mrpl24	Mrpl24-FL-9	FSM	Cluster1
PB.76363.14	Rab11a	Rab11a-FL-14	FSM	Cluster1
PB.43301.230	Bub1b	Bub1b-S-230	ISM	Cluster1
PB.8164.98	Nup37	Nup37-FL-98	ISM	Cluster1
PB.61276.2	Arf5	Arf5-FL-2	FSM	Cluster1
PB.61428.30	Mest	Mest-FL-30	FSM	Cluster1
PB.22186.9	Ccno	Ccno-FL-9	FSM	Cluster1
PB.22754.1	Gm30108	Gm30108-S-1	NNC	Cluster1
PB.7592.13	Pofut2	Pofut2-FL-13	NIC	Cluster1
PB.25213.1	Gpr180	Gpr180-FL-1	FSM	Cluster1
PB.14283.1	Dcaf7	Dcaf7-FL-1	FSM	Cluster1
PB.38094.128	Ttc9c	Ttc9c-FL-128	FSM	Cluster1
PB.44295.49	Crnkl1	Crnkl1-FL-49	FSM	Cluster1
PB.70812.10	Lsm1	Lsm1-FL-10	NNC	Cluster1
PB.8833.44	Tbc1d15	Tbc1d15-FL-44	FSM	Cluster1
PB.22030.3	Gm31452	Gm31452-S-3	NNC	Cluster1
PB.2316.125	Trip12	Trip12-S-125	ISM	Cluster1
PB.65426.88	Obox5	Obox5-FL-88	NNC	Cluster1
PB.70810.2	Plpp5	Plpp5-FL-2	FSM	Cluster1
PB.20140.22	Susd3	Susd3-S-22	ISM	Cluster1
PB.11283.26	Ccdc69	Ccdc69-S-26	ISM	Cluster1
PB.45618.118	Rbm38	Rbm38-S-118	NNC	Cluster1
PB.38829.19	Mbl2	Mbl2-FL-19	ISM	Cluster1
PB.69662.7	Ctbp2	Ctbp2-FL-7	NIC	Cluster1
PB.61427.36	Cep41	Cep41-S-36	FSM	Cluster1
PB.76244.129	Kif23	Kif23-S-129	ISM	Cluster1
PB.54713.392	Gm13103	Gm13103-S-392	ISM	Cluster1
PB.44669.1	Gm14216	Gm14216-S-1	NNC	Cluster1
PB.80264.4	Taz	Taz-FL-4	FSM	Cluster1
PB.43836.23	Gm14027	Gm14027-FL-23	NNC	Cluster1
PB.50099.5	Mos	Mos-S-5	FSM	Cluster1
PB.71752.52	Trim61	Trim61-FL-52	NIC	Cluster1
PB.58834.4	Prkab1	Prkab1-FL-4	FSM	Cluster1
PB.66549.139	Lsm14a	Lsm14a-S-139	ISM	Cluster1
PB.70340.50	Ing1	Ing1-FL-50	FSM	Cluster1
PB.71751.30	Trim75	Trim75-FL-30	FSM	Cluster1
PB.25339.117	Tm9sf2	Tm9sf2-S-117	ISM	Cluster1
PB.52872.127	Mknk1	Mknk1-FL-127	NNC	Cluster1
PB.71587.8	Neil3	Neil3-FL-8	FSM	Cluster1
PB.70709.2	Plat	Plat-FL-2	FSM	Cluster1
PB.75939.2	Rcn2	Rcn2-S-2	FSM	Cluster1
PB.1497.2	Clk1	Clk1-S-2	ISM	Cluster1
PB.68867.2	Copb1	Copb1-FL-2	FSM	Cluster1
PB.48167.5	S100a14	S100a14-FL-5	FSM	Cluster1
PB.75772.363	Btg4	Btg4-FL-363	ISM	Cluster1
PB.35630.75	Fhod3	Fhod3-S-75	ISM	Cluster1
PB.9479.1	Il23a	Il23a-FL-1	FSM	Cluster1
PB.54003.51	Gpn2	Gpn2-FL-51	ISM	Cluster1
PB.61907.26	Ezh2	Ezh2-S-26	ISM	Cluster1
PB.43778.2	Astl	Astl-FL-2	FSM	Cluster1
PB.78078.1092	Fbxw22	Fbxw22-S-1092	ISM	Cluster1
PB.5728.11	Vta1	Vta1-FL-11	FSM	Cluster1
PB.22004.15	Gm28989	Gm28989-FL-15	NNC	Cluster1
PB.74987.5	Herpud2	Herpud2-FL-5	ISM	Cluster1
PB.8833.231	Tbc1d15	Tbc1d15-FL-231	FSM	Cluster1
PB.48447.38	Platr30	Platr30-S-38	FSM	Cluster1
PB.23156.94	Ncoa4	Ncoa4-S-94	FSM	Cluster1
PB.76995.24	Omt2b	Omt2b-S-24	NNC	Cluster1
PB.45066.5	R3hdml	R3hdml-FL-5	ISM	Cluster1
PB.76493.33	Ppib	Ppib-S-33	NNC	Cluster1
PB.70423.104	Tmco3	Tmco3-FL-104	ISM	Cluster1
PB.49458.11	Lef1	Lef1-FL-11	NIC	Cluster1
PB.480.105	Khdc1b	Khdc1b-FL-105	FSM	Cluster1
PB.4996.83	Degs1	Degs1-FL-83	ISM	Cluster1
PB.49508.1	Ppa2	Ppa2-S-1	FSM	Cluster1
PB.24580.6	Cpb2	Cpb2-FL-6	NNC	Cluster1
PB.6628.5	Prep	Prep-FL-5	NNC	Cluster1
PB.52723.17	Btf3l4	Btf3l4-FL-17	FSM	Cluster1
PB.21865.7	Mrps36	Mrps36-S-7	FSM	Cluster1
PB.65130.6	Gm5065	Gm5065-FL-6	FSM	Cluster1
PB.17947.7	Kcnk13	Kcnk13-FL-7	ISM	Cluster1
PB.48305.184	Psmd4	Psmd4-S-184	ISM	Cluster1
PB.7567.55	Mcm3ap	Mcm3ap-S-55	ISM	Cluster1
PB.57729.36	Rchy1	Rchy1-FL-36	FSM	Cluster1
PB.19569.6	Gm11381	Gm11381-S-6	NNC	Cluster1
PB.76244.10	Kif23	Kif23-S-10	NIC	Cluster1
PB.71751.37	Trim75	Trim75-FL-37	NNC	Cluster1
PB.5728.14	Vta1	Vta1-S-14	FSM	Cluster1
PB.33113.1	Abhd16a	Abhd16a-FL-1	FSM	Cluster1
PB.61896.129	Cul1	Cul1-FL-129	NIC	Cluster1
PB.52872.7	Mknk1	Mknk1-FL-7	NIC	Cluster1
PB.16138.2	9130015A21Rik	9130015A21Rik-S-2	NNC	Cluster1
PB.74435.17	Birc3	Birc3-S-17	ISM	Cluster1
PB.65932.2	Ethe1	Ethe1-FL-2	ISM	Cluster1
PB.21450.115	Ssbp2	Ssbp2-S-115	ISM	Cluster1
PB.24699.3	Epsti1	Epsti1-FL-3	FSM	Cluster1
PB.65419.168	Obox2	Obox2-FL-168	ISM	Cluster1
PB.22772.99	Ap3m1	Ap3m1-FL-99	FSM	Cluster1
PB.56715.5	Fbxl5	Fbxl5-FL-5	FSM	Cluster1
PB.74934.42	Anln	Anln-FL-42	ISM	Cluster1
PB.71397.2	Ufsp2	Ufsp2-FL-2	FSM	Cluster1
PB.39827.6	Dclre1a	Dclre1a-S-6	ISM	Cluster1
PB.6225.1	Zup1	Zup1-FL-1	NIC	Cluster1
PB.1806.6	Rpe	Rpe-FL-6	FSM	Cluster1
PB.45618.116	Rbm38	Rbm38-FL-116	FSM	Cluster1
PB.26312.17	Atp6v1c1	Atp6v1c1-FL-17	FSM	Cluster1
PB.13701.19	Fbxl20	Fbxl20-FL-19	FSM	Cluster1
PB.63450.1	Eif4e3	Eif4e3-FL-1	FSM	Cluster1
PB.29262.1	Ccdc74a	Ccdc74a-FL-1	FSM	Cluster1
PB.70670.21	Ckap2	Ckap2-FL-21	FSM	Cluster1
PB.57084.62	Smim14	Smim14-FL-62	NNC	Cluster1
PB.19045.1	Psma2	Psma2-FL-1	FSM	Cluster1
PB.20278.20	Auh	Auh-S-20	ISM	Cluster1
PB.46777.1	Bbs7	Bbs7-FL-1	NNC	Cluster1
PB.49409.37	Pla2g12a	Pla2g12a-S-37	FSM	Cluster1
PB.52416.17	Ak4	Ak4-S-17	NNC	Cluster1
PB.78078.1100	Fbxw22	Fbxw22-S-1100	ISM	Cluster1
PB.16033.76	Lamb1	Lamb1-FL-76	ISM	Cluster1
PB.78404.167	Itga9	Itga9-FL-167	ISM	Cluster1
PB.43301.8	Bub1b	Bub1b-FL-8	FSM	Cluster1
PB.10076.7	Fignl1	Fignl1-FL-7	FSM	Cluster1
PB.34845.21	Pigf	Pigf-S-21	NNC	Cluster1
PB.40936.49	Med27	Med27-FL-49	NIC	Cluster1
PB.27571.1	1700029P11Rik	1700029P11Rik-S-1	FSM	Cluster1
PB.6861.21	Gm4981	Gm4981-FL-21	FSM	Cluster1
PB.66549.144	Lsm14a	Lsm14a-S-144	ISM	Cluster1
PB.45344.95	Rnf114	Rnf114-S-95	ISM	Cluster1
PB.2210.2	Serpine2	Serpine2-S-2	ISM	Cluster1
PB.61907.36	Ezh2	Ezh2-S-36	ISM	Cluster1
PB.81415.1	Arxes1	Arxes1-FL-1	FSM	Cluster1
PB.28992.71	Snx29	Snx29-FL-71	NNC	Cluster1
PB.61444.42	Mkln1	Mkln1-FL-42	NIC	Cluster1
PB.73739.310	Mphosph6	Mphosph6-S-310	FSM	Cluster1
PB.36136.83	Spry4	Spry4-FL-83	FSM	Cluster1
PB.68691.7	Lmo1	Lmo1-FL-7	FSM	Cluster1
PB.33250.5	BC023719	BC023719-FL-5	FSM	Cluster1
PB.22772.95	Ap3m1	Ap3m1-FL-95	NIC	Cluster1
PB.62229.59	Znrf2	Znrf2-S-59	NNC	Cluster1
PB.21783.16	Map1b	Map1b-S-16	ISM	Cluster1
PB.43501.115	Ccndbp1	Ccndbp1-FL-115	NNC	Cluster1
PB.59027.10	Oas1e	Oas1e-FL-10	FSM	Cluster1
PB.10555.1	Asb3	Asb3-FL-1	FSM	Cluster1
PB.39787.5	Vti1a	Vti1a-FL-5	FSM	Cluster1
PB.40286.10	Mindy3	Mindy3-FL-10	FSM	Cluster1
PB.74727.37	Zfp560	Zfp560-S-37	NNC	Cluster1
PB.38075.1	Slc3a2	Slc3a2-FL-1	FSM	Cluster1
PB.22726.17	Anxa7	Anxa7-S-17	ISM	Cluster1
PB.37664.66	Cdk2ap2	Cdk2ap2-S-66	ISM	Cluster1
PB.38237.142	Oosp1	Oosp1-FL-142	ISM	Cluster1
PB.39827.24	Dclre1a	Dclre1a-S-24	NIC	Cluster1
PB.8833.345	Tbc1d15	Tbc1d15-S-345	ISM	Cluster1
PB.1555.5	Fzd7	Fzd7-S-5	FSM	Cluster1
PB.32047.1	Zfp942	Zfp942-FL-1	FSM	Cluster1
PB.63789.46	H1foo	H1foo-FL-46	NIC	Cluster1
PB.4923.22	9130409I23Rik	9130409I23Rik-S-22	ISM	Cluster1
PB.57240.8	Gnpda2	Gnpda2-S-8	FSM	Cluster1
PB.63789.90	H1foo	H1foo-FL-90	NNC	Cluster1
PB.21980.8	Srek1ip1	Srek1ip1-S-8	ISM	Cluster1
PB.9402.33	R3hdm2	R3hdm2-S-33	NNC	Cluster1
PB.7836.102	Oaz1	Oaz1-S-102	ISM	Cluster1
PB.29207.1	Sdf2l1	Sdf2l1-FL-1	FSM	Cluster1
PB.23275.21	Ghitm	Ghitm-FL-21	FSM	Cluster1
PB.71102.51	Saraf	Saraf-S-51	ISM	Cluster1
PB.42945.6	Pdhx	Pdhx-S-6	ISM	Cluster1
PB.78078.1449	Fbxw19	Fbxw19-FL-1449	ISM	Cluster1
PB.7094.47	Srgn	Srgn-FL-47	NIC	Cluster1
PB.6750.18	Nus1	Nus1-S-18	FSM	Cluster1
PB.35780.12	Wdr36	Wdr36-S-12	ISM	Cluster1
PB.44735.9	Edem2	Edem2-FL-9	NIC	Cluster1
PB.18365.2	Wdr20	Wdr20-FL-2	FSM	Cluster1
PB.81835.10	Ubqln2	Ubqln2-S-10	FSM	Cluster1
PB.82166.4	Msl3	Msl3-FL-4	FSM	Cluster1
PB.13811.1	Krt10	Krt10-S-1	ISM	Cluster1
PB.78078.692	Fbxw28	Fbxw28-S-692	ISM	Cluster1
PB.57730.88	Uso1	Uso1-S-88	ISM	Cluster1
PB.57801.10	Ccng2	Ccng2-S-10	NIC	Cluster1
PB.25328.39	Ubac2	Ubac2-FL-39	FSM	Cluster1
PB.25339.114	Tm9sf2	Tm9sf2-S-114	ISM	Cluster1
PB.69083.87	Mettl9	Mettl9-FL-87	FSM	Cluster1
PB.49180.38	Ptbp2	Ptbp2-FL-38	FSM	Cluster1
PB.72354.9	Scoc	Scoc-S-9	ISM	Cluster1
PB.22119.266	Gpbp1	Gpbp1-S-266	ISM	Cluster1
PB.28126.56	D030018L15Rik	D030018L15Rik-FL-56	NNC	Cluster1
PB.73118.60	Edc4	Edc4-S-60	ISM	Cluster1
PB.62024.54	Fam221a	Fam221a-FL-54	FSM	Cluster1
PB.53323.53	Rragc	Rragc-S-53	FSM	Cluster1
PB.81925.53	Mbtps2	Mbtps2-FL-53	NNC	Cluster1
PB.76332.7	Map2k1	Map2k1-FL-7	FSM	Cluster1
PB.38208.1	Tmem109	Tmem109-FL-1	FSM	Cluster1
PB.46108.2	Il7	Il7-FL-2	FSM	Cluster1
PB.70709.83	Plat	Plat-S-83	ISM	Cluster1
PB.7407.6	Ipmk	Ipmk-FL-6	FSM	Cluster1
PB.49208.13	Cnn3	Cnn3-FL-13	NNC	Cluster1
PB.70709.90	Plat	Plat-S-90	ISM	Cluster1
PB.21865.43	Mrps36	Mrps36-S-43	FSM	Cluster1
PB.48472.4	Txnip	Txnip-FL-4	FSM	Cluster1
PB.43116.6	Lin7c	Lin7c-FL-6	FSM	Cluster1
PB.57853.88	Gm6367	Gm6367-FL-88	NNC	Cluster1
PB.11576.24	Llgl1	Llgl1-S-24	ISM	Cluster1
PB.50930.23	Smu1	Smu1-S-23	ISM	Cluster1
PB.11260.5	Cdc42se2	Cdc42se2-S-5	FSM	Cluster1
PB.26187.34	Fbxo43	Fbxo43-S-34	ISM	Cluster1
PB.28655.2	Gtsf2	Gtsf2-FL-2	NNC	Cluster1
PB.33919.87	Uhrf1	Uhrf1-S-87	ISM	Cluster1
PB.58834.2	Prkab1	Prkab1-FL-2	FSM	Cluster1
PB.28458.11	Smagp	Smagp-S-11	ISM	Cluster1
PB.74874.13	Rab3d	Rab3d-S-13	FSM	Cluster1
PB.72788.28	Amfr	Amfr-S-28	ISM	Cluster1
PB.11415.23	Zfp692	Zfp692-S-23	ISM	Cluster1
PB.48447.41	Platr30	Platr30-S-41	NNC	Cluster1
PB.3147.2	3110009E18Rik	3110009E18Rik-S-2	FSM	Cluster1
PB.7567.44	Mcm3ap	Mcm3ap-S-44	ISM	Cluster1
PB.56389.2	Spon2	Spon2-S-2	NNC	Cluster1
PB.37664.15	Cdk2ap2	Cdk2ap2-S-15	NIC	Cluster1
PB.43116.7	Lin7c	Lin7c-FL-7	FSM	Cluster1
PB.74435.12	Birc3	Birc3-FL-12	NIC	Cluster1
PB.49630.119	Lamtor3	Lamtor3-S-119	ISM	Cluster1
PB.41353.10	Rab14	Rab14-FL-10	FSM	Cluster1
PB.43517.5	Trp53bp1	Trp53bp1-FL-5	NNC	Cluster1
PB.57729.35	Rchy1	Rchy1-S-35	ISM	Cluster1
PB.1461.3	1700066M21Rik	1700066M21Rik-FL-3	FSM	Cluster1
PB.71627.15	Cep44	Cep44-FL-15	FSM	Cluster1
PB.43301.176	Bub1b	Bub1b-S-176	ISM	Cluster1
PB.56788.186	5730480H06Rik	5730480H06Rik-S-186	FSM	Cluster1
PB.61422.93	Cpa1	Cpa1-S-93	ISM	Cluster1
PB.43301.187	Bub1b	Bub1b-S-187	ISM	Cluster1
PB.71509.3	Dctd	Dctd-FL-3	NIC	Cluster1
PB.75696.97	Usp28	Usp28-S-97	ISM	Cluster1
PB.33230.80	Atat1	Atat1-FL-80	NIC	Cluster1
PB.57431.68	Exoc1	Exoc1-S-68	FSM	Cluster1
PB.65203.182	Aurkc	Aurkc-S-182	ISM	Cluster1
PB.78078.295	Fbxw14	Fbxw14-S-295	ISM	Cluster1
PB.16217.9	Ifrd1	Ifrd1-FL-9	FSM	Cluster1
PB.25329.6	1810041H14Rik	1810041H14Rik-S-6	NNC	Cluster1
PB.23914.4	Dhrs1	Dhrs1-S-4	ISM	Cluster1
PB.29681.1	Il1rap	Il1rap-FL-1	FSM	Cluster1
PB.53323.72	Rragc	Rragc-FL-72	NIC	Cluster1
PB.66055.163	Nlrp4a	Nlrp4a-FL-163	ISM	Cluster1
PB.30749.1	Chmp2b	Chmp2b-S-1	FSM	Cluster1
PB.56087.1	Insig1	Insig1-FL-1	FSM	Cluster1
PB.8309.12	Nedd1	Nedd1-S-12	FSM	Cluster1
PB.44012.7	Tmem230	Tmem230-FL-7	FSM	Cluster1
PB.8833.239	Tbc1d15	Tbc1d15-S-239	ISM	Cluster1
PB.62024.53	Fam221a	Fam221a-FL-53	FSM	Cluster1
PB.25036.49	Slain1	Slain1-S-49	ISM	Cluster1
PB.47532.52	Nmd3	Nmd3-FL-52	FSM	Cluster1
PB.71686.46	Nek1	Nek1-S-46	ISM	Cluster1
PB.75843.21	Acat1	Acat1-FL-21	ISM	Cluster1
PB.12752.1	Zfp207	Zfp207-FL-1	FSM	Cluster1
PB.28126.41	D030018L15Rik	D030018L15Rik-FL-41	NNC	Cluster1
PB.43301.227	Bub1b	Bub1b-S-227	ISM	Cluster1
PB.35340.37	Npc1	Npc1-S-37	ISM	Cluster1
PB.38675.8	Gm48775	Gm48775-S-8	NNC	Cluster1
PB.42950.72	Ehf	Ehf-S-72	NIC	Cluster1
PB.81231.1	Cldn34c1	Cldn34c1-FL-1	FSM	Cluster1
PB.31807.3	Smoc2	Smoc2-FL-3	FSM	Cluster1
PB.57284.1	Nfxl1	Nfxl1-S-1	ISM	Cluster1
PB.65239.125	Nlrp4b	Nlrp4b-S-125	ISM	Cluster1
PB.78078.1091	Fbxw22	Fbxw22-S-1091	ISM	Cluster1
PB.43517.16	Trp53bp1	Trp53bp1-FL-16	NNC	Cluster1
PB.82378.50	Vamp7	Vamp7-FL-50	FSM	Cluster1
PB.68168.14	Dlg2	Dlg2-S-14	NNC	Cluster1
PB.49660.69	Eif4e	Eif4e-S-69	FSM	Cluster1
PB.73528.150	Cfdp1	Cfdp1-S-150	ISM	Cluster1
PB.21170.18	Sdha	Sdha-S-18	ISM	Cluster1
PB.76244.12	Kif23	Kif23-S-12	ISM	Cluster1
PB.12737.6	Rhot1	Rhot1-FL-6	FSM	Cluster1
PB.71425.33	Cenpu	Cenpu-S-33	FSM	Cluster1
PB.68867.9	Copb1	Copb1-S-9	ISM	Cluster1
PB.43517.8	Trp53bp1	Trp53bp1-S-8	ISM	Cluster1
PB.52416.6	Ak4	Ak4-S-6	NNC	Cluster1
PB.33176.9	2300002M23Rik	2300002M23Rik-FL-9	FSM	Cluster1
PB.41077.8	Tor1a	Tor1a-S-8	FSM	Cluster1
PB.15595.82	Pdia6	Pdia6-S-82	ISM	Cluster1
PB.18181.4	Vrk1	Vrk1-S-4	FSM	Cluster1
PB.28126.45	D030018L15Rik	D030018L15Rik-FL-45	NIC	Cluster1
PB.10770.9	Mat2b	Mat2b-FL-9	ISM	Cluster1
PB.47339.2	Gpr149	Gpr149-FL-2	ISM	Cluster1
PB.2722.14	Stk25	Stk25-FL-14	FSM	Cluster1
PB.64778.1	Tm7sf3	Tm7sf3-FL-1	FSM	Cluster1
PB.42088.3	Gorasp2	Gorasp2-S-3	FSM	Cluster1
PB.61034.6	2610001J05Rik	2610001J05Rik-S-6	FSM	Cluster1
PB.73118.55	Edc4	Edc4-S-55	ISM	Cluster1
PB.71626.99	Fbxo8	Fbxo8-S-99	ISM	Cluster1
PB.1014.27	Tbc1d8	Tbc1d8-S-27	ISM	Cluster1
PB.82378.39	Vamp7	Vamp7-FL-39	FSM	Cluster1
PB.18141.49	Tcl1	Tcl1-FL-49	ISM	Cluster1
PB.56497.5	Mfsd10	Mfsd10-S-5	ISM	Cluster1
PB.21823.23	Gtf2h2	Gtf2h2-FL-23	FSM	Cluster1
PB.76244.18	Kif23	Kif23-FL-18	NIC	Cluster1
PB.17048.3	Tmem30b	Tmem30b-FL-3	FSM	Cluster1
PB.67509.78	Snrpa1	Snrpa1-FL-78	FSM	Cluster1
PB.76119.1	Nptn	Nptn-S-1	FSM	Cluster1
PB.75939.47	Rcn2	Rcn2-S-47	ISM	Cluster1
PB.55917.1	Nupl2	Nupl2-FL-1	FSM	Cluster1
PB.45152.65	Zswim3	Zswim3-FL-65	FSM	Cluster1
PB.52600.71	Tmem59	Tmem59-S-71	ISM	Cluster1
PB.68480.16	Numa1	Numa1-FL-16	NNC	Cluster1
PB.23450.32	Gnpnat1	Gnpnat1-S-32	FSM	Cluster1
PB.19569.3	Gm11381	Gm11381-S-3	NNC	Cluster1
PB.75793.223	Rdx	Rdx-S-223	ISM	Cluster1
PB.28374.226	Cers5	Cers5-FL-226	FSM	Cluster1
PB.5114.7	Lyplal1	Lyplal1-FL-7	FSM	Cluster1
PB.65203.17	Aurkc	Aurkc-FL-17	NNC	Cluster1
PB.14908.10	Birc5	Birc5-S-10	FSM	Cluster1
PB.4874.5	Cdc42bpa	Cdc42bpa-FL-5	NIC	Cluster1
PB.70709.75	Plat	Plat-S-75	ISM	Cluster1
PB.65239.138	Nlrp4b	Nlrp4b-S-138	ISM	Cluster1
PB.50930.31	Smu1	Smu1-S-31	ISM	Cluster1
PB.61768.6	Wee2	Wee2-FL-6	FSM	Cluster1
PB.44324.107	Xrn2	Xrn2-S-107	ISM	Cluster1
PB.22258.15	Gm47913	Gm47913-S-15	FSM	Cluster1
PB.48880.14	Cept1	Cept1-S-14	ISM	Cluster1
PB.34605.41	Atl2	Atl2-S-41	ISM	Cluster1
PB.23914.7	Dhrs1	Dhrs1-FL-7	NNC	Cluster1
PB.42233.25	Chn1	Chn1-S-25	ISM	Cluster1
PB.36117.98	Ndfip1	Ndfip1-S-98	ISM	Cluster1
PB.59171.38	Atp2a2	Atp2a2-S-38	ISM	Cluster1
PB.34118.12	Fbxl17	Fbxl17-S-12	NNC	Cluster1
PB.1699.51	Gpr1	Gpr1-S-51	NIC	Cluster1
PB.73674.239	Cenpn	Cenpn-S-239	ISM	Cluster1
PB.16217.19	Ifrd1	Ifrd1-S-19	ISM	Cluster1
PB.22772.20	Ap3m1	Ap3m1-FL-20	FSM	Cluster1
PB.34425.5	Ypel5	Ypel5-FL-5	NNC	Cluster1
PB.41213.2	Fpgs	Fpgs-FL-2	FSM	Cluster1
PB.38225.11	Ms4a1	Ms4a1-FL-11	FSM	Cluster1
PB.21499.13	Tent2	Tent2-FL-13	FSM	Cluster1
PB.76244.15	Kif23	Kif23-FL-15	NIC	Cluster1
PB.52600.86	Tmem59	Tmem59-S-86	ISM	Cluster1
PB.62444.113	Mad2l1	Mad2l1-S-113	ISM	Cluster1
PB.26109.128	Laptm4b	Laptm4b-S-128	ISM	Cluster1
PB.28595.288	Pcbp2	Pcbp2-S-288	FSM	Cluster1
PB.76150.2	Adpgk	Adpgk-FL-2	FSM	Cluster1
PB.49660.84	Eif4e	Eif4e-S-84	FSM	Cluster1
PB.68706.8	BC051019	BC051019-S-8	NIC	Cluster1
PB.65203.13	Aurkc	Aurkc-FL-13	NNC	Cluster1
PB.46992.3	Noct	Noct-FL-3	FSM	Cluster1
PB.43301.152	Bub1b	Bub1b-S-152	ISM	Cluster1
PB.21865.56	Cenph	Cenph-S-56	NIC	Cluster1
PB.75939.43	Rcn2	Rcn2-S-43	ISM	Cluster1
PB.14012.3	E130111B04Rik	E130111B04Rik-S-3	NNC	Cluster1
PB.35157.34	Rab18	Rab18-FL-34	FSM	Cluster1
PB.39789.5	Zdhhc6	Zdhhc6-FL-5	FSM	Cluster1
PB.68575.33	Gm45272	Gm45272-S-33	FSM	Cluster1
PB.43536.72	Serf2	Serf2-S-72	NNC	Cluster1
PB.24746.32	Naa16	Naa16-FL-32	FSM	Cluster1
PB.28941.1	Socs1	Socs1-S-1	FSM	Cluster1
PB.66058.150	Nlrp9c	Nlrp9c-S-150	ISM	Cluster1
PB.20135.2	Wnk2	Wnk2-S-2	ISM	Cluster1
PB.63789.49	H1foo	H1foo-S-49	ISM	Cluster1
PB.21810.193	Smn1	Smn1-S-193	ISM	Cluster1
PB.78078.1086	Fbxw22	Fbxw22-FL-1086	NIC	Cluster1
PB.4684.15	Pigm	Pigm-S-15	FSM	Cluster1
PB.29599.6	Eif4a2	Eif4a2-FL-6	FSM	Cluster1
PB.3436.59	Mdm4	Mdm4-FL-59	NNC	Cluster1
PB.40936.246	Med27	Med27-S-246	ISM	Cluster1
PB.71102.49	Saraf	Saraf-S-49	ISM	Cluster1
PB.78078.152	Fbxw20	Fbxw20-S-152	ISM	Cluster1
PB.66460.2	Kmt2b	Kmt2b-FL-2	ISM	Cluster1
PB.59280.11	Zcchc8	Zcchc8-FL-11	FSM	Cluster1
PB.18141.4	Tcl1	Tcl1-FL-4	NNC	Cluster1
PB.73160.3	Slc7a6os	Slc7a6os-FL-3	ISM	Cluster1
PB.200.8	Prex2	Prex2-S-8	NIC	Cluster1
PB.58834.8	Prkab1	Prkab1-FL-8	FSM	Cluster1
PB.45618.88	Rae1	Rae1-S-88	ISM	Cluster1
PB.40275.1	Fbh1	Fbh1-S-1	ISM	Cluster1
PB.11124.15	Skp1a	Skp1a-S-15	ISM	Cluster1
PB.35340.38	Npc1	Npc1-S-38	ISM	Cluster1
PB.44735.7	Edem2	Edem2-S-7	ISM	Cluster1
PB.2593.17	Lrrfip1	Lrrfip1-FL-17	NIC	Cluster1
PB.66504.6	Lsr	Lsr-S-6	ISM	Cluster1
PB.22845.19	E330034G19Rik	E330034G19Rik-FL-19	NNC	Cluster1
PB.80090.2	Tmem185a	Tmem185a-FL-2	FSM	Cluster1
PB.39740.80	Smc3	Smc3-S-80	ISM	Cluster1
PB.42360.28	Plekha3	Plekha3-S-28	ISM	Cluster1
PB.79559.1	C1galt1c1	C1galt1c1-S-1	FSM	Cluster1
PB.1497.69	Clk1	Clk1-FL-69	FSM	Cluster1
PB.23960.15	Cenpj	Cenpj-S-15	ISM	Cluster1
PB.48312.167	Vps72	Vps72-S-167	ISM	Cluster1
PB.15595.70	Pdia6	Pdia6-FL-70	ISM	Cluster1
PB.67995.23	A530021J07Rik	A530021J07Rik-S-23	NNC	Cluster1
PB.39101.7	Cep55	Cep55-FL-7	NIC	Cluster1
PB.32640.2	Srsf3	Srsf3-FL-2	FSM	Cluster1
PB.13093.105	Smg8	Smg8-S-105	FSM	Cluster1
PB.23156.76	Ncoa4	Ncoa4-S-76	ISM	Cluster1
PB.45975.8	Tpd52l2	Tpd52l2-FL-8	FSM	Cluster1
PB.53179.1	Ctps	Ctps-FL-1	FSM	Cluster1
PB.66549.101	Lsm14a	Lsm14a-S-101	ISM	Cluster1
PB.20239.34	Cks2	Cks2-S-34	NNC	Cluster1
PB.46849.1	Plk4	Plk4-FL-1	FSM	Cluster1
PB.72801.1	Nup93	Nup93-FL-1	FSM	Cluster1
PB.10306.14	Mdh1	Mdh1-S-14	ISM	Cluster1
PB.70709.97	Plat	Plat-S-97	ISM	Cluster1
PB.27486.1	Slc25a17	Slc25a17-FL-1	FSM	Cluster1
PB.69754.1	Tcerg1l	Tcerg1l-S-1	ISM	Cluster1
PB.36986.7	Ptpn2	Ptpn2-FL-7	NIC	Cluster1
PB.25059.188	Ndfip2	Ndfip2-S-188	FSM	Cluster1
PB.42447.16	Gm13752	Gm13752-S-16	NNC	Cluster1
PB.35340.3	Npc1	Npc1-S-3	ISM	Cluster1
PB.1014.24	Tbc1d8	Tbc1d8-S-24	ISM	Cluster1
PB.58659.4	Alkbh2	Alkbh2-FL-4	NNC	Cluster1
PB.33113.45	Abhd16a	Abhd16a-S-45	NIC	Cluster1
PB.64467.11	Borcs5	Borcs5-FL-11	NNC	Cluster1
PB.48880.9	Cept1	Cept1-S-9	ISM	Cluster1
PB.21128.37	Clptm1l	Clptm1l-S-37	ISM	Cluster1
PB.33176.2	2300002M23Rik	2300002M23Rik-FL-2	FSM	Cluster1
PB.45975.204	Tpd52l2	Tpd52l2-S-204	ISM	Cluster1
PB.3376.3	Slc45a3	Slc45a3-FL-3	FSM	Cluster1
PB.6225.16	Zup1	Zup1-S-16	ISM	Cluster1
PB.71975.13	Arrdc2	Arrdc2-S-13	FSM	Cluster1
PB.51335.15	Erp44	Erp44-FL-15	FSM	Cluster1
PB.70709.94	Plat	Plat-S-94	ISM	Cluster1
PB.41478.15	Arpc5l	Arpc5l-FL-15	FSM	Cluster1
PB.17899.1	Spata7	Spata7-FL-1	FSM	Cluster1
PB.54132.226	Syf2	Syf2-S-226	ISM	Cluster1
PB.73160.2	Slc7a6os	Slc7a6os-S-2	ISM	Cluster1
PB.36096.4	Rnf14	Rnf14-FL-4	FSM	Cluster1
PB.2476.37	Atg16l1	Atg16l1-S-37	ISM	Cluster1
PB.25008.21	Gm49292	Gm49292-S-21	NNC	Cluster1
PB.66535.104	Pdcd2l	Pdcd2l-S-104	ISM	Cluster1
PB.16217.18	Ifrd1	Ifrd1-S-18	FSM	Cluster1
PB.13093.103	Smg8	Smg8-FL-103	FSM	Cluster1
PB.22555.4	Thoc7	Thoc7-FL-4	NIC	Cluster1
PB.33691.9	Taf8	Taf8-FL-9	ISM	Cluster1
PB.78679.31	Slc6a20a	Slc6a20a-FL-31	FSM	Cluster1
PB.52416.3	Ak4	Ak4-S-3	NNC	Cluster1
PB.77866.10	Rbm15b	Rbm15b-S-10	FSM	Cluster1
PB.34383.89	Ndc80	Ndc80-S-89	ISM	Cluster1
PB.17048.5	Tmem30b	Tmem30b-S-5	FSM	Cluster1
PB.66535.102	Pdcd2l	Pdcd2l-FL-102	ISM	Cluster1
PB.43464.23	Zfp106	Zfp106-FL-23	NNC	Cluster1
PB.54725.31	Oog3	Oog3-FL-31	NNC	Cluster1
PB.71151.33	Eri1	Eri1-FL-33	FSM	Cluster1
PB.27110.5	Fbxl6	Fbxl6-S-5	ISM	Cluster1
PB.4221.35	Ralgps2	Ralgps2-FL-35	FSM	Cluster1
PB.70730.3	Golga7	Golga7-FL-3	FSM	Cluster1
PB.31040.1	Cct8	Cct8-FL-1	FSM	Cluster1
PB.12349.210	Ywhae	Ywhae-FL-210	ISM	Cluster1
PB.56448.1	Gm1673	Gm1673-S-1	FSM	Cluster1
PB.48037.1	Efna1	Efna1-S-1	FSM	Cluster1
PB.1062.1	Slc9a4	Slc9a4-FL-1	FSM	Cluster1
PB.33113.43	Abhd16a	Abhd16a-S-43	ISM	Cluster1
PB.34383.86	Ndc80	Ndc80-S-86	ISM	Cluster1
PB.44523.207	Tpx2	Tpx2-S-207	ISM	Cluster1
PB.49630.117	Lamtor3	Lamtor3-S-117	ISM	Cluster1
PB.15595.66	Pdia6	Pdia6-FL-66	ISM	Cluster1
PB.37011.50	Rnmt	Rnmt-FL-50	NIC	Cluster1
PB.70670.20	Ckap2	Ckap2-S-20	ISM	Cluster1
PB.50930.28	Smu1	Smu1-FL-28	ISM	Cluster1
PB.58630.38	Iscu	Iscu-S-38	FSM	Cluster1
PB.19046.8	Mrpl32	Mrpl32-FL-8	FSM	Cluster1
PB.61513.422	Bpgm	Bpgm-S-422	NNC	Cluster1
PB.59366.37	Tmed2	Tmed2-S-37	ISM	Cluster1
PB.54132.59	Rsrp1	Rsrp1-FL-59	NIC	Cluster1
PB.37780.42	Sf3b2	Sf3b2-S-42	ISM	Cluster1
PB.55976.5	Rheb	Rheb-S-5	ISM	Cluster1
PB.4798.51	Adss	Adss-FL-51	FSM	Cluster1
PB.62157.144	Tax1bp1	Tax1bp1-S-144	ISM	Cluster1
PB.48002.73	Dap3	Dap3-FL-73	FSM	Cluster1
PB.39740.82	Smc3	Smc3-S-82	ISM	Cluster1
PB.78639.8	1110059G10Rik	1110059G10Rik-S-8	ISM	Cluster1
PB.5074.2	2022-03-02	Marc2-S-2	ISM	Cluster1
PB.15888.7	Mboat2	Mboat2-FL-7	FSM	Cluster1
PB.5769.62	Reps1	Reps1-S-62	ISM	Cluster1
PB.67874.10	Blm	Blm-S-10	ISM	Cluster1
PB.57203.5	Tmem33	Tmem33-FL-5	FSM	Cluster1
PB.7801.8	Rexo1	Rexo1-S-8	ISM	Cluster1
PB.29581.1	Tbccd1	Tbccd1-FL-1	ISM	Cluster1
PB.20297.11	Sptlc1	Sptlc1-FL-11	FSM	Cluster1
PB.41507.1	Lrp1b	Lrp1b-FL-1	FSM	Cluster1
PB.29581.4	Tbccd1	Tbccd1-FL-4	FSM	Cluster1
PB.54914.108	Tardbp	Tardbp-FL-108	NIC	Cluster1
PB.30633.26	Cmss1	Cmss1-S-26	FSM	Cluster1
PB.72530.5	Orc6	Orc6-FL-5	FSM	Cluster1
PB.22845.15	E330034G19Rik	E330034G19Rik-FL-15	NIC	Cluster1
PB.75772.26	Btg4	Btg4-FL-26	FSM	Cluster1
PB.72530.1	Orc6	Orc6-FL-1	FSM	Cluster1
PB.18137.244	Tcl1b1	Tcl1b1-FL-244	FSM	Cluster1
PB.19045.4	Psma2	Psma2-FL-4	FSM	Cluster1
PB.18137.502	Tcl1b3	Tcl1b3-FL-502	FSM	Cluster1
PB.1407.5	Mob4	Mob4-FL-5	FSM	Cluster1
PB.71683.1	Hpf1	Hpf1-FL-1	FSM	Cluster1
PB.74570.1	Cwc15	Cwc15-FL-1	FSM	Cluster1
PB.75772.15	Btg4	Btg4-FL-15	FSM	Cluster1
PB.76658.2	Ccnb2	Ccnb2-S-2	ISM	Cluster1
PB.78078.685	Fbxw28	Fbxw28-FL-685	FSM	Cluster1
PB.75772.25	Btg4	Btg4-FL-25	FSM	Cluster1
PB.68174.1	Ccdc90b	Ccdc90b-FL-1	FSM	Cluster1
PB.43308.3	Knstrn	Knstrn-FL-3	FSM	Cluster1
PB.75772.45	Btg4	Btg4-FL-45	FSM	Cluster1
PB.65121.3	Rfpl4	Rfpl4-FL-3	FSM	Cluster1
PB.4530.1	Nuf2	Nuf2-FL-1	FSM	Cluster1
PB.18137.214	Tcl1b1	Tcl1b1-FL-214	FSM	Cluster1
PB.78078.292	Fbxw14	Fbxw14-FL-292	NNC	Cluster1
PB.17780.12	Gm10436	Gm10436-FL-12	FSM	Cluster1
PB.34365.27	Myl12a	Myl12a-FL-27	FSM	Cluster1
PB.63717.3	Sec13	Sec13-FL-3	FSM	Cluster1
PB.63042.57	Snrnp27	Snrnp27-S-57	NNC	Cluster1
PB.49929.30	Dnajb4	Dnajb4-FL-30	FSM	Cluster1
PB.72833.10	Polr2c	Polr2c-FL-10	FSM	Cluster1
PB.78078.2187	Fbxw18	Fbxw18-FL-2187	FSM	Cluster1
PB.65380.26	Obox7	Obox7-FL-26	FSM	Cluster1
PB.78078.2379	Fbxw27	Fbxw27-S-2379	NIC	Cluster1
PB.20278.16	Auh	Auh-FL-16	NIC	Cluster1
PB.17753.24	Oog1	Oog1-FL-24	FSM	Cluster1
PB.22845.18	E330034G19Rik	E330034G19Rik-FL-18	FSM	Cluster1
PB.21316.8	Cetn3	Cetn3-FL-8	FSM	Cluster1
PB.72409.1	Rln3	Rln3-FL-1	FSM	Cluster1
PB.18137.437	Tcl1b5	Tcl1b5-FL-437	FSM	Cluster1
PB.10817.7	Pttg1	Pttg1-FL-7	FSM	Cluster1
PB.46889.1	Sclt1	Sclt1-FL-1	NNC	Cluster1
PB.71683.2	Hpf1	Hpf1-FL-2	NIC	Cluster1
PB.37498.19	Timm21	Timm21-FL-19	FSM	Cluster1
PB.20239.30	Cks2	Cks2-S-30	FSM	Cluster1
PB.40145.3	Echdc3	Echdc3-FL-3	FSM	Cluster1
PB.78078.1800	Fbxw24	Fbxw24-FL-1800	FSM	Cluster1
PB.32298.27	Ube2i	Ube2i-FL-27	FSM	Cluster1
PB.18137.497	Tcl1b3	Tcl1b3-FL-497	NNC	Cluster1
PB.34845.14	Pigf	Pigf-S-14	FSM	Cluster1
PB.58785.1	Sirt4	Sirt4-S-1	FSM	Cluster1
PB.82037.44	Rbbp7	Rbbp7-FL-44	FSM	Cluster1
PB.65203.3	Aurkc	Aurkc-FL-3	NIC	Cluster1
PB.78078.278	Fbxw14	Fbxw14-FL-278	FSM	Cluster1
PB.45975.4	Tpd52l2	Tpd52l2-FL-4	FSM	Cluster1
PB.64673.4	Ldhb	Ldhb-FL-4	FSM	Cluster1
PB.18542.5	Ighg2b	Ighg2b-S-5	NNC	Cluster1
PB.47896.5	Mrpl24	Mrpl24-FL-5	FSM	Cluster1
PB.35277.10	Snrpd1	Snrpd1-FL-10	FSM	Cluster1
PB.49988.3	Acadm	Acadm-S-3	ISM	Cluster1
PB.17762.118	Gm2042	Gm2042-S-118	FSM	Cluster1
PB.72478.99	Syce2	Syce2-S-99	NIC	Cluster1
PB.53952.15	Cd164l2	Cd164l2-FL-15	FSM	Cluster1
PB.49835.60	Gng5	Gng5-S-60	FSM	Cluster1
PB.26425.12	Eny2	Eny2-FL-12	FSM	Cluster1
PB.78078.1438	Fbxw19	Fbxw19-S-1438	ISM	Cluster1
PB.11724.5	Tvp23b	Tvp23b-FL-5	FSM	Cluster1
PB.22845.95	E330034G19Rik	E330034G19Rik-S-95	FSM	Cluster1
PB.57179.1	Uchl1	Uchl1-FL-1	NNC	Cluster1
PB.72354.5	Scoc	Scoc-S-5	FSM	Cluster1
PB.17753.36	Oog1	Oog1-S-36	NNC	Cluster1
PB.63175.1	Gm839	Gm839-FL-1	FSM	Cluster1
PB.14942.2	Cyth1	Cyth1-S-2	NNC	Cluster1
PB.19569.10	Gm11381	Gm11381-S-10	NNC	Cluster1
PB.49933.502	Nexn	Nexn-S-502	ISM	Cluster1
PB.13379.9	Cdc34b	Cdc34b-S-9	FSM	Cluster1
PB.68704.1	Akip1	Akip1-FL-1	FSM	Cluster1
PB.78078.153	Fbxw20	Fbxw20-FL-153	FSM	Cluster1
PB.23914.1	Dhrs1	Dhrs1-FL-1	FSM	Cluster1
PB.38236.13	Oosp3	Oosp3-S-13	FSM	Cluster1
PB.77844.4	Grm2	Grm2-S-4	ISM	Cluster1
PB.75772.35	Btg4	Btg4-FL-35	FSM	Cluster1
PB.17065.1	Snapc1	Snapc1-FL-1	FSM	Cluster1
PB.26711.50	Nsmce2	Nsmce2-FL-50	NNC	Cluster1
PB.24657.95	Tsc22d1	Tsc22d1-FL-95	FSM	Cluster1
PB.22690.7	Rtraf	Rtraf-S-7	FSM	Cluster1
PB.34146.92	AU016765	AU016765-S-92	NIC	Cluster1
PB.67911.13	Sec11a	Sec11a-S-13	FSM	Cluster1
PB.28458.10	Smagp	Smagp-S-10	FSM	Cluster1
PB.59026.132	Oas1d	Oas1d-FL-132	FSM	Cluster1
PB.1747.1	2810408I11Rik	2810408I11Rik-FL-1	FSM	Cluster1
PB.78078.684	Fbxw28	Fbxw28-FL-684	FSM	Cluster1
PB.77268.21	Mthfs	Mthfs-FL-21	NIC	Cluster1
PB.22845.26	E330034G19Rik	E330034G19Rik-FL-26	NNC	Cluster1
PB.5183.125	Cenpf	Cenpf-S-125	ISM	Cluster1
PB.64467.19	Borcs5	Borcs5-FL-19	FSM	Cluster1
PB.78078.1089	Fbxw22	Fbxw22-S-1089	NNC	Cluster1
PB.34146.106	AU016765	AU016765-S-106	FSM	Cluster1
PB.61896.42	Cul1	Cul1-S-42	ISM	Cluster1
PB.31317.2	Pigp	Pigp-FL-2	FSM	Cluster1
PB.58710.2	1500011B03Rik	1500011B03Rik-S-2	FSM	Cluster1
PB.1924.10	Pecr	Pecr-FL-10	FSM	Cluster1
PB.78078.1435	Fbxw19	Fbxw19-FL-1435	FSM	Cluster1
PB.59027.21	Oas1e	Oas1e-FL-21	FSM	Cluster1
PB.63068.32	D6Ertd527e	D6Ertd527e-FL-32	FSM	Cluster1
PB.60982.6	AA545190	AA545190-S-6	FSM	Cluster1
PB.28458.12	Smagp	Smagp-S-12	FSM	Cluster1
PB.49925.10	Gipc2	Gipc2-S-10	FSM	Cluster1
PB.63107.79	Hmces	Hmces-FL-79	NIC	Cluster1
PB.55555.25	Abcb1b	Abcb1b-FL-25	NIC	Cluster1
PB.30586.21	Senp7	Senp7-FL-21	ISM	Cluster1
PB.73739.3	Mphosph6	Mphosph6-FL-3	FSM	Cluster1
PB.17762.123	Gm2042	Gm2042-FL-123	NIC	Cluster1
PB.78078.1307	Fbxw16	Fbxw16-FL-1307	FSM	Cluster1
PB.65071.3	Cox6b2	Cox6b2-S-3	FSM	Cluster1
PB.49925.8	Gipc2	Gipc2-S-8	ISM	Cluster1
PB.14747.142	H3f3b	H3f3b-FL-142	FSM	Cluster1
PB.64699.48	D6Ertd474e	D6Ertd474e-S-48	FSM	Cluster1
PB.75735.38	Tex12	Tex12-S-38	FSM	Cluster1
PB.65071.2	Cox6b2	Cox6b2-S-2	FSM	Cluster1
PB.65121.87	Rfpl4	Rfpl4-FL-87	FSM	Cluster1
PB.64673.9	Ldhb	Ldhb-FL-9	NIC	Cluster1
PB.58164.1	Hsd17b13	Hsd17b13-FL-1	NNC	Cluster1
PB.53952.14	Cd164l2	Cd164l2-FL-14	NNC	Cluster1
PB.4874.14	Cdc42bpa	Cdc42bpa-FL-14	FSM	Cluster1
PB.17753.37	Oog1	Oog1-FL-37	NNC	Cluster1
PB.58041.1	Plac8	Plac8-FL-1	FSM	Cluster1
PB.14584.7	Fam104a	Fam104a-FL-7	FSM	Cluster1
PB.54713.39	Gm13023	Gm13023-FL-39	FSM	Cluster1
PB.48125.37	Creb3l4	Creb3l4-FL-37	ISM	Cluster1
PB.75525.2	Ccdc84	Ccdc84-FL-2	FSM	Cluster1
PB.78078.1802	Fbxw24	Fbxw24-FL-1802	NIC	Cluster1
PB.59889.38	Rasa4	Rasa4-FL-38	ISM	Cluster1
PB.78078.1090	Fbxw22	Fbxw22-S-1090	ISM	Cluster1
PB.41557.2	Gm13465	Gm13465-S-2	NNC	Cluster1
PB.42029.7	Bbs5	Bbs5-FL-7	FSM	Cluster1
PB.64758.10	Itpr2	Itpr2-S-10	ISM	Cluster1
PB.22770.47	Adk	Adk-FL-47	FSM	Cluster1
PB.9409.12	Shmt2	Shmt2-S-12	FSM	Cluster1
PB.75772.98	Btg4	Btg4-FL-98	NNC	Cluster1
PB.78078.1309	Fbxw16	Fbxw16-S-1309	ISM	Cluster1
PB.42494.2	Zc3h15	Zc3h15-S-2	ISM	Cluster1
PB.54725.337	C87977	C87977-S-337	FSM	Cluster1
PB.7567.51	Mcm3ap	Mcm3ap-FL-51	ISM	Cluster1
PB.44983.4	Top1	Top1-S-4	ISM	Cluster1
PB.34146.99	AU016765	AU016765-S-99	NIC	Cluster1
PB.70654.7	Fam90a1a	Fam90a1a-FL-7	FSM	Cluster1
PB.58519.1	Hscb	Hscb-FL-1	FSM	Cluster1
PB.21216.2	Glrx	Glrx-FL-2	FSM	Cluster1
PB.43124.4	Ccdc34	Ccdc34-S-4	ISM	Cluster1
PB.45153.11	Pcif1	Pcif1-S-11	NNC	Cluster1
PB.54698.4	Oog4	Oog4-S-4	FSM	Cluster1
PB.53557.1	Gja4	Gja4-FL-1	FSM	Cluster1
PB.77819.12	Alas1	Alas1-FL-12	NIC	Cluster1
PB.59194.152	Rnf34	Rnf34-S-152	ISM	Cluster1
PB.6432.48	Cdc40	Cdc40-S-48	ISM	Cluster1
PB.52119.14	C87499	C87499-FL-14	ISM	Cluster1
PB.54134.26	Tmem50a	Tmem50a-FL-26	FSM	Cluster1
PB.958.13	Eif5b	Eif5b-S-13	ISM	Cluster1
PB.76292.64	Pias1	Pias1-FL-64	FSM	Cluster1
PB.34146.94	AU016765	AU016765-S-94	FSM	Cluster1
PB.39642.164	Sfr1	Sfr1-S-164	ISM	Cluster1
PB.65642.1	Nanos2	Nanos2-FL-1	FSM	Cluster1
PB.78078.643	Fbxw28	Fbxw28-FL-643	NIC	Cluster1
PB.68661.2	Ppfibp2	Ppfibp2-S-2	ISM	Cluster1
PB.54714.16	Oog2	Oog2-S-16	NIC	Cluster1
PB.48312.3	Vps72	Vps72-FL-3	FSM	Cluster1
PB.63012.67	C87436	C87436-FL-67	NNC	Cluster1
PB.48857.40	Rap1a	Rap1a-FL-40	FSM	Cluster1
PB.78528.10	Gm47066	Gm47066-S-10	FSM	Cluster1
PB.12605.2	Ift20	Ift20-FL-2	FSM	Cluster1
PB.49355.57	Larp7	Larp7-S-57	ISM	Cluster1
PB.19567.1	Gmds	Gmds-FL-1	FSM	Cluster1
PB.76996.9	Omt2a	Omt2a-S-9	NIC	Cluster1
PB.16575.12	Nfkbia	Nfkbia-S-12	FSM	Cluster1
PB.63164.94	Gm1965	Gm1965-FL-94	FSM	Cluster1
PB.39840.258	Ccdc186	Ccdc186-S-258	ISM	Cluster1
PB.78078.693	Fbxw28	Fbxw28-FL-693	NNC	Cluster1
PB.65131.42	Nlrp2	Nlrp2-FL-42	ISM	Cluster1
PB.62365.34	Ccser1	Ccser1-S-34	FSM	Cluster1
PB.17446.76	Rbm25	Rbm25-S-76	NIC	Cluster1
PB.39574.7	Arl3	Arl3-FL-7	FSM	Cluster1
PB.5471.59	Rgs17	Rgs17-FL-59	FSM	Cluster1
PB.29061.2	3110001I22Rik	3110001I22Rik-FL-2	FSM	Cluster1
PB.6392.73	Amd1	Amd1-FL-73	FSM	Cluster1
PB.53958.18	Map3k6	Map3k6-FL-18	NIC	Cluster1
PB.43893.16	Nop56	Nop56-S-16	ISM	Cluster1
PB.59207.117	Gm2479	Gm2479-S-117	FSM	Cluster1
PB.23098.130	Gnl3	Gnl3-S-130	ISM	Cluster1
PB.46388.5	Gyg	Gyg-FL-5	FSM	Cluster1
PB.3831.212	Rgs2	Rgs2-S-212	FSM	Cluster1
PB.4879.13	Psen2	Psen2-FL-13	FSM	Cluster1
PB.43542.87	Mfap1b	Mfap1b-S-87	ISM	Cluster1
PB.34131.17	Fer	Fer-FL-17	NNC	Cluster1
PB.31206.7	Son	Son-S-7	ISM	Cluster1
PB.19746.16	Riok1	Riok1-S-16	NIC	Cluster1
PB.44777.225	Rbm39	Rbm39-S-225	ISM	Cluster1
PB.22351.3	Tcstv1	Tcstv1-FL-3	NNC	Cluster1
PB.32139.3	Srrm2	Srrm2-S-3	ISM	Cluster1
PB.51356.29	Msantd3	Msantd3-S-29	NNC	Cluster1
PB.73528.7	Cfdp1	Cfdp1-S-7	NNC	Cluster1
PB.72530.22	Orc6	Orc6-FL-22	FSM	Cluster1
PB.6924.2	Mcu	Mcu-FL-2	ISM	Cluster1
PB.22845.510	E330034G19Rik	E330034G19Rik-S-510	NIC	Cluster1
PB.22770.66	Adk	Adk-FL-66	NNC	Cluster1
PB.51647.3	Hsdl2	Hsdl2-S-3	ISM	Cluster1
PB.57179.80	Uchl1	Uchl1-FL-80	FSM	Cluster1
PB.75793.9	Rdx	Rdx-S-9	ISM	Cluster1
PB.44983.2	Top1	Top1-S-2	ISM	Cluster1
PB.55455.2	Akap9	Akap9-S-2	ISM	Cluster1
PB.50924.32	Dnaja1	Dnaja1-S-32	ISM	Cluster1
PB.18137.64	Tcl1b2	Tcl1b2-FL-64	FSM	Cluster1
PB.3265.20	Ubxn4	Ubxn4-S-20	ISM	Cluster1
PB.23968.4	Mphosph8	Mphosph8-S-4	ISM	Cluster1
PB.1825.3	Gm15668	Gm15668-FL-3	NNC	Cluster1
PB.54713.68	Gm13023	Gm13023-S-68	FSM	Cluster1
PB.55545.125	Dbf4	Dbf4-S-125	ISM	Cluster1
PB.57729.360	G3bp2	G3bp2-S-360	FSM	Cluster1
PB.57286.5	Zar1	Zar1-S-5	ISM	Cluster1
PB.40936.43	Med27	Med27-FL-43	NIC	Cluster1
PB.75268.123	Chek1	Chek1-FL-123	FSM	Cluster1
PB.63164.95	Gm1965	Gm1965-FL-95	FSM	Cluster1
PB.78078.1668	Fbxw15	Fbxw15-FL-1668	NIC	Cluster1
PB.72671.9	Nkd1	Nkd1-FL-9	FSM	Cluster1
PB.18542.8	Ighg2b	Ighg2b-FL-8	NNC	Cluster1
PB.38096.87	Bscl2	Bscl2-S-87	ISM	Cluster1
PB.12201.2	Tax1bp3	Tax1bp3-FL-2	FSM	Cluster1
PB.16021.1	Sh3yl1	Sh3yl1-FL-1	FSM	Cluster1
PB.60050.2	Cnpy4	Cnpy4-FL-2	FSM	Cluster1
PB.61513.31	Bpgm	Bpgm-FL-31	NNC	Cluster1
PB.74684.70	Mbd3l2	Mbd3l2-FL-70	FSM	Cluster1
PB.62157.15	Tax1bp1	Tax1bp1-S-15	ISM	Cluster1
PB.35066.21	Mtpap	Mtpap-S-21	FSM	Cluster1
PB.63973.35	Cecr2	Cecr2-S-35	ISM	Cluster1
PB.82052.54	Txlng	Txlng-S-54	ISM	Cluster1
PB.44781.32	Phf20	Phf20-S-32	NNC	Cluster1
PB.78078.2375	Fbxw27	Fbxw27-S-2375	NIC	Cluster1
PB.17028.27	Mnat1	Mnat1-FL-27	ISM	Cluster1
PB.14707.282	Mif4gd	Mif4gd-FL-282	FSM	Cluster1
PB.18137.442	Tcl1b5	Tcl1b5-FL-442	NNC	Cluster1
PB.30157.15	Gtf2e1	Gtf2e1-FL-15	FSM	Cluster1
PB.16975.9	Jkamp	Jkamp-FL-9	FSM	Cluster1
PB.72477.74	Calr	Calr-S-74	FSM	Cluster1
PB.3756.15	Aspm	Aspm-FL-15	NIC	Cluster1
PB.39132.4	Plce1	Plce1-S-4	ISM	Cluster1
PB.31156.2	Cfap298	Cfap298-FL-2	FSM	Cluster1
PB.60393.87	Baiap2l1	Baiap2l1-S-87	ISM	Cluster1
PB.75793.5	Rdx	Rdx-S-5	ISM	Cluster1
PB.59370.9	Eif2b1	Eif2b1-S-9	FSM	Cluster1
PB.59026.402	Oas1d	Oas1d-S-402	ISM	Cluster1
PB.24476.57	Npm2	Npm2-S-57	NNC	Cluster1
PB.75772.49	Btg4	Btg4-FL-49	FSM	Cluster1
PB.57286.2	Zar1	Zar1-S-2	FSM	Cluster1
PB.78078.1816	Fbxw24	Fbxw24-FL-1816	ISM	Cluster1
PB.72540.59	4921524J17Rik	4921524J17Rik-FL-59	FSM	Cluster1
PB.75793.6	Rdx	Rdx-S-6	ISM	Cluster1
PB.69662.64	Ctbp2	Ctbp2-FL-64	NIC	Cluster1
PB.71257.375	Cnot7	Cnot7-FL-375	FSM	Cluster1
PB.44219.62	Snrpb2	Snrpb2-FL-62	NNC	Cluster1
PB.56628.34	Lyar	Lyar-S-34	ISM	Cluster1
PB.39760.12	Bbip1	Bbip1-S-12	FSM	Cluster1
PB.17853.51	Ston2	Ston2-FL-51	NIC	Cluster1
PB.47397.3	Tiparp	Tiparp-FL-3	FSM	Cluster1
PB.27927.12	Miox	Miox-FL-12	ISM	Cluster1
PB.13814.1	Krt12	Krt12-FL-1	ISM	Cluster1
PB.23968.13	Mphosph8	Mphosph8-S-13	ISM	Cluster1
PB.35826.2	Pkd2l2	Pkd2l2-S-2	FSM	Cluster1
PB.49262.2	Dnttip2	Dnttip2-S-2	ISM	Cluster1
PB.75656.8	Gm31816	Gm31816-S-8	NNC	Cluster1
PB.77012.90	Ooep	Ooep-FL-90	FSM	Cluster1
PB.17762.121	Gm2042	Gm2042-FL-121	NIC	Cluster1
PB.25214.9	Tgds	Tgds-FL-9	FSM	Cluster1
PB.4852.37	Smyd3	Smyd3-FL-37	FSM	Cluster1
PB.34146.100	AU016765	AU016765-S-100	FSM	Cluster1
PB.43112.1	Mettl15	Mettl15-S-1	FSM	Cluster1
PB.76196.25	Gm15507	Gm15507-S-25	NIC	Cluster1
PB.59902.47	Prkrip1	Prkrip1-S-47	ISM	Cluster1
PB.2652.33	Ndufa10	Ndufa10-FL-33	FSM	Cluster1
PB.40286.89	Mindy3	Mindy3-S-89	NIC	Cluster1
PB.74605.1	Taf1d	Taf1d-S-1	ISM	Cluster1
PB.71683.18	Hpf1	Hpf1-FL-18	NNC	Cluster1
PB.82037.11	Rbbp7	Rbbp7-FL-11	FSM	Cluster1
PB.25235.9	Dnajc3	Dnajc3-S-9	ISM	Cluster1
PB.49933.361	Nexn	Nexn-FL-361	ISM	Cluster1
PB.40102.25	Nudt5	Nudt5-FL-25	NNC	Cluster1
PB.23450.78	Gnpnat1	Gnpnat1-S-78	FSM	Cluster1
PB.38096.11	Bscl2	Bscl2-FL-11	FSM	Cluster1
PB.78078.2186	Fbxw18	Fbxw18-FL-2186	NIC	Cluster1
PB.76152.25	Bbs4	Bbs4-S-25	FSM	Cluster1
PB.78078.1450	Fbxw19	Fbxw19-S-1450	ISM	Cluster1
PB.15126.2	Cenpx	Cenpx-S-2	FSM	Cluster1
PB.8833.456	Tbc1d15	Tbc1d15-S-456	ISM	Cluster1
PB.43542.5	Mfap1b	Mfap1b-FL-5	FSM	Cluster1
PB.45344.12	Rnf114	Rnf114-FL-12	NNC	Cluster1
PB.535.22	Smap1	Smap1-S-22	ISM	Cluster1
PB.27335.114	Csnk1e	Csnk1e-FL-114	NIC	Cluster1
PB.30659.4	Gabrr3	Gabrr3-FL-4	NNC	Cluster1
PB.5516.5	Ppil4	Ppil4-S-5	ISM	Cluster1
PB.55860.9	Orc5	Orc5-FL-9	NIC	Cluster1
PB.21865.187	Ccnb1	Ccnb1-S-187	FSM	Cluster1
PB.65426.17	Obox5	Obox5-FL-17	NIC	Cluster1
PB.36843.79	Nedd4l	Nedd4l-FL-79	ISM	Cluster1
PB.55545.126	Dbf4	Dbf4-S-126	FSM	Cluster1
PB.48472.65	Txnip	Txnip-S-65	ISM	Cluster1
PB.36247.24	Dpysl3	Dpysl3-FL-24	NNC	Cluster1
PB.543.4	Sdhaf4	Sdhaf4-FL-4	NNC	Cluster1
PB.49747.19	Gtf2b	Gtf2b-FL-19	FSM	Cluster1
PB.19849.72	Tmem14c	Tmem14c-FL-72	FSM	Cluster1
PB.52723.55	Btf3l4	Btf3l4-S-55	FSM	Cluster1
PB.76244.113	Kif23	Kif23-S-113	NIC	Cluster1
PB.52920.188	Nasp	Nasp-S-188	ISM	Cluster1
PB.78078.154	Fbxw20	Fbxw20-FL-154	NIC	Cluster1
PB.3181.57	Ddx18	Ddx18-S-57	ISM	Cluster1
PB.35826.9	Pkd2l2	Pkd2l2-S-9	NNC	Cluster1
PB.36268.5	Dcp2	Dcp2-S-5	ISM	Cluster1
PB.49933.609	Nexn	Nexn-S-609	ISM	Cluster1
PB.39642.1	Sfr1	Sfr1-S-1	ISM	Cluster1
PB.64673.17	Ldhb	Ldhb-S-17	ISM	Cluster1
PB.59027.103	Oas1e	Oas1e-FL-103	FSM	Cluster1
PB.62833.152	Pcgf1	Pcgf1-FL-152	ISM	Cluster1
PB.22057.2	Ndufaf2	Ndufaf2-FL-2	FSM	Cluster1
PB.52723.52	Btf3l4	Btf3l4-FL-52	NNC	Cluster1
PB.78078.1660	Fbxw15	Fbxw15-FL-1660	FSM	Cluster1
PB.43246.98	Meis2	Meis2-FL-98	FSM	Cluster1
PB.28417.3	Mettl7a3	Mettl7a3-FL-3	FSM	Cluster1
PB.11724.63	Tvp23b	Tvp23b-S-63	ISM	Cluster1
PB.63450.63	Eif4e3	Eif4e3-FL-63	FSM	Cluster1
PB.39916.34	Shtn1	Shtn1-S-34	ISM	Cluster1
PB.21078.12	Ice1	Ice1-S-12	ISM	Cluster1
PB.59233.7	Psmd9	Psmd9-S-7	FSM	Cluster1
PB.3756.23	Aspm	Aspm-FL-23	NIC	Cluster1
PB.30057.14	Sec22a	Sec22a-S-14	FSM	Cluster1
PB.65380.11	Obox7	Obox7-FL-11	NNC	Cluster1
PB.49929.156	Dnajb4	Dnajb4-FL-156	FSM	Cluster1
PB.78078.702	Fbxw28	Fbxw28-S-702	ISM	Cluster1
PB.44781.57	Phf20	Phf20-S-57	NIC	Cluster1
PB.46688.2	Fxr1	Fxr1-S-2	ISM	Cluster1
PB.62103.276	Hnrnpa2b1	Hnrnpa2b1-S-276	ISM	Cluster1
PB.52920.193	Nasp	Nasp-S-193	FSM	Cluster1
PB.34198.177	Ralbp1	Ralbp1-FL-177	ISM	Cluster1
PB.49925.12	Gipc2	Gipc2-S-12	NNC	Cluster1
PB.58330.133	Evi5	Evi5-S-133	NIC	Cluster1
PB.64699.42	D6Ertd474e	D6Ertd474e-S-42	FSM	Cluster1
PB.21590.264	Zbed3	Zbed3-S-264	NNC	Cluster1
PB.13345.66	Luc7l3	Luc7l3-S-66	ISM	Cluster1
PB.67447.48	Mphosph10	Mphosph10-S-48	ISM	Cluster1
PB.21141.2	Brd9	Brd9-S-2	ISM	Cluster1
PB.48472.69	Txnip	Txnip-FL-69	NIC	Cluster1
PB.42120.5	Hat1	Hat1-FL-5	NIC	Cluster1
PB.64587.39	Slc15a5	Slc15a5-FL-39	NIC	Cluster1
PB.27335.122	Csnk1e	Csnk1e-FL-122	NIC	Cluster1
PB.53867.5	Dnajc8	Dnajc8-S-5	ISM	Cluster1
PB.24989.40	Lmo7	Lmo7-S-40	NIC	Cluster1
PB.958.8	Eif5b	Eif5b-S-8	ISM	Cluster1
PB.42586.1	Gm13715	Gm13715-S-1	FSM	Cluster1
PB.21865.570	Ccnb1	Ccnb1-FL-570	FSM	Cluster1
PB.17762.114	Gm2042	Gm2042-FL-114	FSM	Cluster1
PB.24230.2	Pinx1	Pinx1-S-2	FSM	Cluster1
PB.55820.1	Lrrc17	Lrrc17-S-1	NIC	Cluster1
PB.8682.67	Syt1	Syt1-FL-67	NNC	Cluster1
PB.68971.121	Arl6ip1	Arl6ip1-S-121	FSM	Cluster1
PB.3831.205	Rgs2	Rgs2-S-205	FSM	Cluster1
PB.51024.4	Rpp25l	Rpp25l-FL-4	FSM	Cluster1
PB.12445.28	Nsrp1	Nsrp1-S-28	FSM	Cluster1
PB.24476.58	Npm2	Npm2-S-58	ISM	Cluster1
PB.53494.1	Clspn	Clspn-S-1	ISM	Cluster1
PB.42197.22	6430710C18Rik	6430710C18Rik-S-22	NNC	Cluster1
PB.22845.21	E330034G19Rik	E330034G19Rik-FL-21	NIC	Cluster1
PB.21590.913	Zbed3	Zbed3-S-913	NNC	Cluster1
PB.19567.67	Gmds	Gmds-FL-67	NIC	Cluster1
PB.27927.13	Miox	Miox-FL-13	NIC	Cluster1
PB.43124.7	Ccdc34	Ccdc34-S-7	ISM	Cluster1
PB.54713.41	Gm13023	Gm13023-S-41	FSM	Cluster1
PB.18444.3	Eif5	Eif5-S-3	ISM	Cluster1
PB.18542.6	Ighg2b	Ighg2b-FL-6	NNC	Cluster1
PB.3756.16	Aspm	Aspm-FL-16	NIC	Cluster1
PB.75772.398	Btg4	Btg4-S-398	ISM	Cluster1
PB.68614.10	Taf10	Taf10-FL-10	FSM	Cluster1
PB.37672.3	Tmem134	Tmem134-FL-3	FSM	Cluster1
PB.82093.73	Zrsr2	Zrsr2-S-73	ISM	Cluster1
PB.58743.6	Acads	Acads-S-6	NNC	Cluster1
PB.958.14	Eif5b	Eif5b-S-14	ISM	Cluster1
PB.19046.20	Mrpl32	Mrpl32-FL-20	FSM	Cluster1
PB.23078.8	Sfmbt1	Sfmbt1-S-8	ISM	Cluster1
PB.75418.22	Sc5d	Sc5d-FL-22	FSM	Cluster1
PB.6478.25	Cep57l1	Cep57l1-FL-25	NNC	Cluster1
PB.60345.67	Rac1	Rac1-S-67	FSM	Cluster1
PB.55557.8	Abcb4	Abcb4-S-8	NNC	Cluster1
PB.57179.126	Uchl1	Uchl1-S-126	ISM	Cluster1
PB.76978.4	Fbxo9	Fbxo9-FL-4	FSM	Cluster1
PB.30205.30	Popdc2	Popdc2-S-30	NIC	Cluster1
PB.60982.7	AA545190	AA545190-S-7	NIC	Cluster1
PB.71644.1	Sap30	Sap30-FL-1	FSM	Cluster1
PB.49413.1	Mcub	Mcub-FL-1	FSM	Cluster1
PB.24161.2	Gm26969	Gm26969-S-2	FSM	Cluster1
PB.47496.1	Smc4	Smc4-S-1	ISM	Cluster1
PB.49933.552	Nexn	Nexn-S-552	ISM	Cluster1
PB.33516.490	Hsp90ab1	Hsp90ab1-S-490	ISM	Cluster1
PB.56301.10	Slc4a1ap	Slc4a1ap-S-10	ISM	Cluster1
PB.71645.8	Hmgb2	Hmgb2-S-8	ISM	Cluster1
PB.43246.96	Meis2	Meis2-FL-96	FSM	Cluster1
PB.31844.5	Tbp	Tbp-FL-5	FSM	Cluster1
PB.59026.382	Oas1d	Oas1d-FL-382	ISM	Cluster1
PB.65203.176	Aurkc	Aurkc-S-176	ISM	Cluster1
PB.18355.252	Hsp90aa1	Hsp90aa1-S-252	ISM	Cluster1
PB.18355.271	Hsp90aa1	Hsp90aa1-S-271	ISM	Cluster1
PB.74588.27	Izumo1r	Izumo1r-S-27	FSM	Cluster1
PB.21590.18	Zbed3	Zbed3-FL-18	FSM	Cluster1
PB.65419.157	Obox2	Obox2-FL-157	FSM	Cluster1
PB.18137.501	Tcl1b3	Tcl1b3-FL-501	NNC	Cluster1
PB.37576.1	Gm45871	Gm45871-FL-1	FSM	Cluster1
PB.77012.83	Ooep	Ooep-FL-83	FSM	Cluster1
PB.76658.1	Ccnb2	Ccnb2-FL-1	FSM	Cluster1
PB.4798.75	Adss	Adss-FL-75	FSM	Cluster1
PB.69716.16	Ptpre	Ptpre-FL-16	ISM	Cluster1
PB.32473.1	Grm4	Grm4-FL-1	ISM	Cluster1
PB.28061.95	Zcrb1	Zcrb1-S-95	FSM	Cluster1
PB.59393.19	Zfp664	Zfp664-S-19	ISM	Cluster1
PB.54498.7	Padi6	Padi6-FL-7	FSM	Cluster1
PB.67447.71	Mphosph10	Mphosph10-S-71	FSM	Cluster1
PB.39868.4	6720468P15Rik	6720468P15Rik-S-4	FSM	Cluster1
PB.42197.23	6430710C18Rik	6430710C18Rik-S-23	ISM	Cluster1
PB.24657.111	Tsc22d1	Tsc22d1-FL-111	NNC	Cluster1
PB.78078.687	Fbxw28	Fbxw28-S-687	ISM	Cluster1
PB.47397.25	Tiparp	Tiparp-S-25	ISM	Cluster1
PB.24627.85	Gtf2f2	Gtf2f2-S-85	ISM	Cluster1
PB.36022.6	Ik	Ik-S-6	ISM	Cluster1
PB.79462.69	Akap17b	Akap17b-S-69	ISM	Cluster1
PB.71752.589	Trim61	Trim61-S-589	FSM	Cluster1
PB.80085.4	1110012L19Rik	1110012L19Rik-FL-4	FSM	Cluster1
PB.23968.2	Mphosph8	Mphosph8-S-2	ISM	Cluster1
PB.44682.293	Eif2s2	Eif2s2-S-293	ISM	Cluster1
PB.75656.9	Gm31816	Gm31816-S-9	NNC	Cluster1
PB.44682.304	Eif2s2	Eif2s2-S-304	FSM	Cluster1
PB.35826.3	Pkd2l2	Pkd2l2-S-3	NIC	Cluster1
PB.42311.2	Hnrnpa3	Hnrnpa3-S-2	ISM	Cluster1
PB.53730.88	Zcchc17	Zcchc17-S-88	ISM	Cluster1
PB.77248.9	Mthfsl	Mthfsl-FL-9	NIC	Cluster1
PB.6919.6	Pla2g12b	Pla2g12b-FL-6	NNC	Cluster1
PB.42729.4	Ddb2	Ddb2-S-4	NIC	Cluster1
PB.36028.7	Zmat2	Zmat2-S-7	ISM	Cluster1
PB.55887.81	Srpk2	Srpk2-S-81	NNC	Cluster1
PB.17780.32	Gm10436	Gm10436-FL-32	FSM	Cluster1
PB.6525.24	Nr2e1	Nr2e1-FL-24	FSM	Cluster1
PB.72906.20	Sap18b	Sap18b-FL-20	FSM	Cluster1
PB.29368.25	Iglv1	Iglv1-S-25	NNC	Cluster1
PB.12349.19	Ywhae	Ywhae-S-19	ISM	Cluster1
PB.30133.3	Iqcb1	Iqcb1-FL-3	FSM	Cluster1
PB.28458.9	Smagp	Smagp-S-9	FSM	Cluster1
PB.77012.112	Ooep	Ooep-S-112	FSM	Cluster1
PB.63164.102	Gm1965	Gm1965-FL-102	FSM	Cluster1
PB.75790.7	Fdx1	Fdx1-FL-7	FSM	Cluster1
PB.62157.22	Tax1bp1	Tax1bp1-S-22	ISM	Cluster1
PB.47496.7	Smc4	Smc4-S-7	ISM	Cluster1
PB.59027.16	Oas1e	Oas1e-S-16	ISM	Cluster1
PB.543.3	Sdhaf4	Sdhaf4-FL-3	FSM	Cluster1
PB.6913.26	P4ha1	P4ha1-S-26	NNC	Cluster1
PB.35443.9	Cdh2	Cdh2-FL-9	NNC	Cluster1
PB.68575.16	Gm45272	Gm45272-S-16	FSM	Cluster1
PB.74934.41	Anln	Anln-S-41	NNC	Cluster1
PB.1394.158	Sf3b1	Sf3b1-S-158	ISM	Cluster1
PB.4874.60	Cdc42bpa	Cdc42bpa-FL-60	NNC	Cluster1
PB.59194.161	Rnf34	Rnf34-S-161	ISM	Cluster1
PB.7935.3	Tle6	Tle6-S-3	ISM	Cluster1
PB.43542.81	Mfap1b	Mfap1b-S-81	ISM	Cluster1
PB.75772.61	Btg4	Btg4-FL-61	NIC	Cluster1
PB.65419.240	Obox1	Obox1-FL-240	NNC	Cluster1
PB.37126.8	Cfap53	Cfap53-S-8	FSM	Cluster1
PB.51285.13	Anp32b	Anp32b-S-13	ISM	Cluster1
PB.34784.24	Ppm1b	Ppm1b-S-24	ISM	Cluster1
PB.21450.97	Ssbp2	Ssbp2-S-97	NNC	Cluster1
PB.55110.12	Vamp3	Vamp3-FL-12	FSM	Cluster1
PB.10637.506	Npm1	Npm1-S-506	ISM	Cluster1
PB.36202.1	Rbm27	Rbm27-S-1	ISM	Cluster1
PB.52119.11	C87499	C87499-FL-11	NIC	Cluster1
PB.36920.36	Gm19784	Gm19784-FL-36	NIC	Cluster1
PB.21590.92	Zbed3	Zbed3-S-92	FSM	Cluster1
PB.2391.355	Ncl	Ncl-S-355	ISM	Cluster1
PB.5183.134	Cenpf	Cenpf-S-134	ISM	Cluster1
PB.59026.45	Oas1h	Oas1h-FL-45	FSM	Cluster1
PB.65121.6	Rfpl4	Rfpl4-FL-6	NIC	Cluster1
PB.55820.83	Lrrc17	Lrrc17-S-83	ISM	Cluster1
PB.17446.69	Rbm25	Rbm25-S-69	NIC	Cluster1
PB.59444.7	Gm42945	Gm42945-S-7	FSM	Cluster1
PB.77442.131	Rasa2	Rasa2-FL-131	ISM	Cluster1
PB.22726.23	Anxa7	Anxa7-S-23	ISM	Cluster1
PB.68131.80	Eed	Eed-S-80	ISM	Cluster1
PB.28868.155	Usp7	Usp7-S-155	ISM	Cluster1
PB.18137.83	Tcl1b2	Tcl1b2-FL-83	NNC	Cluster1
PB.78528.18	Gm47066	Gm47066-S-18	FSM	Cluster1
PB.67798.20	Pex11a	Pex11a-S-20	FSM	Cluster1
PB.31037.1	Usp16	Usp16-S-1	ISM	Cluster1
PB.61699.7	Parp12	Parp12-S-7	ISM	Cluster1
PB.2391.363	Ncl	Ncl-S-363	ISM	Cluster1
PB.37378.3	Gm47272	Gm47272-S-3	NNC	Cluster1
PB.958.10	Eif5b	Eif5b-S-10	ISM	Cluster1
PB.13219.40	Elobl	Elobl-S-40	FSM	Cluster1
PB.27492.147	St13	St13-S-147	ISM	Cluster1
PB.17961.12	Calm1	Calm1-FL-12	NIC	Cluster1
PB.31666.1	1700010I14Rik	1700010I14Rik-S-1	FSM	Cluster1
PB.28686.39	Cluap1	Cluap1-S-39	ISM	Cluster1
PB.60616.46	Mtus2	Mtus2-S-46	NNC	Cluster1
PB.56421.8	Tacc3	Tacc3-S-8	ISM	Cluster1
PB.11637.51	B9d1	B9d1-S-51	NNC	Cluster1
PB.18355.238	Hsp90aa1	Hsp90aa1-S-238	ISM	Cluster1
PB.53952.19	Cd164l2	Cd164l2-FL-19	NIC	Cluster1
PB.18087.32	Ddx24	Ddx24-S-32	FSM	Cluster1
PB.78078.1059	Fbxw22	Fbxw22-S-1059	FSM	Cluster1
PB.49933.475	Nexn	Nexn-S-475	ISM	Cluster1
PB.51285.7	Anp32b	Anp32b-S-7	ISM	Cluster1
PB.48472.78	Txnip	Txnip-S-78	ISM	Cluster1
PB.52887.61	Nsun4	Nsun4-FL-61	NNC	Cluster1
PB.56628.14	Lyar	Lyar-S-14	FSM	Cluster1
PB.40218.1	Kin	Kin-S-1	FSM	Cluster1
PB.19569.5	Gm11381	Gm11381-S-5	NNC	Cluster1
PB.49933.503	Nexn	Nexn-S-503	NIC	Cluster1
PB.33379.22	Gm42418	Gm42418-S-22	FSM	Cluster1
PB.64532.185	E330021D16Rik	E330021D16Rik-S-185	FSM	Cluster1
PB.22726.11	Anxa7	Anxa7-FL-11	FSM	Cluster1
PB.63871.98	Bms1	Bms1-S-98	ISM	Cluster1
PB.42945.58	Pdhx	Pdhx-S-58	ISM	Cluster1
PB.4530.4	Nuf2	Nuf2-FL-4	FSM	Cluster1
PB.39642.112	Sfr1	Sfr1-S-112	NIC	Cluster1
PB.4798.136	Adss	Adss-S-136	ISM	Cluster1
PB.16534.158	Snx6	Snx6-S-158	ISM	Cluster1
PB.44983.3	Top1	Top1-S-3	ISM	Cluster1
PB.43246.99	Meis2	Meis2-FL-99	NIC	Cluster1
PB.26425.7	Eny2	Eny2-S-7	FSM	Cluster1
PB.24046.13	Sap18	Sap18-FL-13	FSM	Cluster1
PB.78078.58	Fbxw21	Fbxw21-FL-58	FSM	Cluster1
PB.57670.19	Ankrd17	Ankrd17-S-19	ISM	Cluster1
PB.82037.26	Rbbp7	Rbbp7-FL-26	NNC	Cluster1
PB.18458.216	Zfyve21	Zfyve21-FL-216	NNC	Cluster1
PB.58824.47	Cit	Cit-S-47	ISM	Cluster1
PB.77998.153	Usp19	Usp19-S-153	ISM	Cluster1
PB.54714.24	Oog2	Oog2-S-24	NIC	Cluster1
PB.65419.21	Obox2	Obox2-FL-21	NNC	Cluster1
PB.49262.7	Dnttip2	Dnttip2-S-7	ISM	Cluster1
PB.71752.586	Trim61	Trim61-S-586	FSM	Cluster1
PB.35823.2	Srp19	Srp19-FL-2	FSM	Cluster1
PB.13219.11	Elobl	Elobl-FL-11	NNC	Cluster1
PB.40420.155	Mllt10	Mllt10-S-155	ISM	Cluster1
PB.57282.3	AU023070	AU023070-S-3	NNC	Cluster1
PB.38187.5	Tmem216	Tmem216-S-5	FSM	Cluster1
PB.7759.88	Cirbp	Cirbp-FL-88	FSM	Cluster1
PB.76916.29	Scg3	Scg3-S-29	ISM	Cluster1
PB.24476.56	Npm2	Npm2-S-56	NNC	Cluster1
PB.3831.216	Rgs2	Rgs2-S-216	FSM	Cluster1
PB.47364.8	Gmps	Gmps-S-8	ISM	Cluster1
PB.71587.7	Neil3	Neil3-S-7	ISM	Cluster1
PB.72530.14	Orc6	Orc6-S-14	ISM	Cluster1
PB.42050.1	Ssb	Ssb-S-1	ISM	Cluster1
PB.57286.4	Zar1	Zar1-FL-4	NIC	Cluster1
PB.43124.8	Ccdc34	Ccdc34-S-8	ISM	Cluster1
PB.42040.27	Phospho2	Phospho2-FL-27	FSM	Cluster1
PB.23452.86	Fermt2	Fermt2-S-86	ISM	Cluster1
PB.53994.93	Nudc	Nudc-S-93	ISM	Cluster1
PB.43258.39	Gm13990	Gm13990-S-39	NNC	Cluster1
PB.23770.3	Trav9-2	Trav9-2-FL-3	FSM	Cluster1
PB.43394.2	Rtf1	Rtf1-S-2	ISM	Cluster1
PB.19567.88	Gmds	Gmds-FL-88	NIC	Cluster1
PB.43530.12	Pdia3	Pdia3-S-12	ISM	Cluster1
PB.78078.304	Fbxw14	Fbxw14-S-304	ISM	Cluster1
PB.63068.662	D6Ertd527e	D6Ertd527e-FL-662	FSM	Cluster1
PB.29148.28	Mcm4	Mcm4-S-28	ISM	Cluster1
PB.61513.43	Bpgm	Bpgm-FL-43	FSM	Cluster1
PB.65419.14	Obox2	Obox2-FL-14	FSM	Cluster1
PB.54713.43	Gm13023	Gm13023-FL-43	FSM	Cluster1
PB.32588.121	Srpk1	Srpk1-S-121	ISM	Cluster1
PB.19387.2	Hist1h2ba	Hist1h2ba-FL-2	FSM	Cluster1
PB.44983.12	Top1	Top1-S-12	ISM	Cluster1
PB.75268.131	Chek1	Chek1-FL-131	FSM	Cluster1
PB.71993.55	Haus8	Haus8-S-55	ISM	Cluster1
PB.71425.1	Cenpu	Cenpu-FL-1	FSM	Cluster1
PB.13219.33	Elobl	Elobl-S-33	FSM	Cluster1
PB.21450.137	Ssbp2	Ssbp2-S-137	ISM	Cluster1
PB.74588.24	Izumo1r	Izumo1r-S-24	FSM	Cluster1
PB.55435.7	Fam133b	Fam133b-S-7	ISM	Cluster1
PB.42494.1	Zc3h15	Zc3h15-S-1	FSM	Cluster1
PB.49270.44	Fnbp1l	Fnbp1l-S-44	ISM	Cluster1
PB.78078.717	Fbxw28	Fbxw28-S-717	ISM	Cluster1
PB.23556.52	Ktn1	Ktn1-S-52	ISM	Cluster1
PB.59026.178	Oas1d	Oas1d-FL-178	FSM	Cluster1
PB.75793.33	Rdx	Rdx-S-33	NIC	Cluster1
PB.49868.7	Gm43574	Gm43574-S-7	FSM	Cluster1
PB.42050.3	Ssb	Ssb-FL-3	ISM	Cluster1
PB.79729.7	Slc25a14	Slc25a14-FL-7	NIC	Cluster1
PB.22754.2	Gm30108	Gm30108-S-2	NNC	Cluster1
PB.18235.32	Evl	Evl-S-32	ISM	Cluster1
PB.59028.47	Oas1c	Oas1c-S-47	ISM	Cluster1
PB.42050.9	Ssb	Ssb-S-9	ISM	Cluster1
PB.12369.35	Rph3al	Rph3al-FL-35	NIC	Cluster1
PB.22845.34	E330034G19Rik	E330034G19Rik-S-34	ISM	Cluster1
PB.81007.192	Atrx	Atrx-S-192	ISM	Cluster1
PB.78078.1803	Fbxw24	Fbxw24-S-1803	ISM	Cluster1
PB.36136.81	Spry4	Spry4-FL-81	FSM	Cluster1
PB.71683.255	Hpf1	Hpf1-FL-255	ISM	Cluster1
PB.8026.10	D10Wsu102e	D10Wsu102e-S-10	FSM	Cluster1
PB.57353.90	Usp46	Usp46-S-90	NNC	Cluster1
PB.13219.4	Elobl	Elobl-FL-4	FSM	Cluster1
PB.63871.79	Bms1	Bms1-S-79	ISM	Cluster1
PB.60350.2	Cyth3	Cyth3-FL-2	FSM	Cluster1
PB.61165.24	Fam3c	Fam3c-S-24	FSM	Cluster1
PB.44777.212	Rbm39	Rbm39-S-212	ISM	Cluster1
PB.967.19	Rev1	Rev1-FL-19	ISM	Cluster1
PB.75793.175	Rdx	Rdx-S-175	ISM	Cluster1
PB.73120.3	Nrn1l	Nrn1l-S-3	NNC	Cluster1
PB.75772.42	Btg4	Btg4-FL-42	NNC	Cluster1
PB.42050.46	Ssb	Ssb-S-46	ISM	Cluster1
PB.24313.131	Esco2	Esco2-S-131	ISM	Cluster1
PB.51461.2	Tmem38b	Tmem38b-FL-2	FSM	Cluster1
PB.2284.16	Daw1	Daw1-FL-16	ISM	Cluster1
PB.78078.286	Fbxw14	Fbxw14-S-286	ISM	Cluster1
PB.42461.56	Nup35	Nup35-FL-56	NNC	Cluster1
PB.60670.94	Hmgb1	Hmgb1-S-94	FSM	Cluster1
PB.2391.350	Ncl	Ncl-S-350	ISM	Cluster1
PB.46136.225	Tpd52	Tpd52-FL-225	FSM	Cluster1
PB.38225.30	Ms4a1	Ms4a1-FL-30	FSM	Cluster1
PB.53730.78	Zcchc17	Zcchc17-S-78	FSM	Cluster1
PB.27335.119	Csnk1e	Csnk1e-FL-119	NIC	Cluster1
PB.34198.176	Ralbp1	Ralbp1-S-176	ISM	Cluster1
PB.57286.1	Zar1	Zar1-FL-1	FSM	Cluster1
PB.36428.3	Tnfaip8	Tnfaip8-S-3	FSM	Cluster1
PB.11724.1	Tvp23b	Tvp23b-S-1	NNC	Cluster1
PB.56420.498	Slbp	Slbp-S-498	ISM	Cluster1
PB.76363.46	Rab11a	Rab11a-FL-46	FSM	Cluster1
PB.77777.142	Atp2c1	Atp2c1-S-142	ISM	Cluster1
PB.2343.133	Sp110	Sp110-S-133	NNC	Cluster1
PB.33379.17	Gm42418	Gm42418-S-17	FSM	Cluster1
PB.35830.33	Reep5	Reep5-S-33	FSM	Cluster1
PB.42828.15	Accsl	Accsl-FL-15	NIC	Cluster1
PB.71645.6	Hmgb2	Hmgb2-S-6	ISM	Cluster1
PB.27010.11	Ly6e	Ly6e-S-11	FSM	Cluster1
PB.80724.43	Ophn1	Ophn1-S-43	NNC	Cluster1
PB.20654.7	Gm35333	Gm35333-S-7	FSM	Cluster1
PB.78078.1809	Fbxw24	Fbxw24-S-1809	ISM	Cluster1
PB.46688.6	Fxr1	Fxr1-S-6	ISM	Cluster1
PB.18355.214	Hsp90aa1	Hsp90aa1-S-214	ISM	Cluster1
PB.40334.1	Cacnb2	Cacnb2-S-1	NNC	Cluster1
PB.78582.1	Higd1a	Higd1a-S-1	FSM	Cluster1
PB.54952.94	Cenps	Cenps-S-94	FSM	Cluster1
PB.24476.54	Npm2	Npm2-S-54	ISM	Cluster1
PB.31037.2	Usp16	Usp16-S-2	ISM	Cluster1
PB.12445.50	Nsrp1	Nsrp1-S-50	ISM	Cluster1
PB.53376.100	Cdca8	Cdca8-S-100	FSM	Cluster1
PB.65121.83	Rfpl4	Rfpl4-FL-83	NIC	Cluster1
PB.36.7	Tcea1	Tcea1-S-7	ISM	Cluster1
PB.59370.10	Eif2b1	Eif2b1-FL-10	NIC	Cluster1
PB.18116.87	Dicer1	Dicer1-S-87	NNC	Cluster1
PB.30136.4	Golgb1	Golgb1-S-4	NNC	Cluster1
PB.12445.41	Nsrp1	Nsrp1-S-41	FSM	Cluster1
PB.65203.163	Aurkc	Aurkc-FL-163	ISM	Cluster1
PB.23719.413	Hnrnpc	Hnrnpc-S-413	ISM	Cluster1
PB.42109.46	Dync1i2	Dync1i2-S-46	NNC	Cluster1
PB.36749.3	Csnk1a1	Csnk1a1-S-3	ISM	Cluster1
PB.75120.4	Nfrkb	Nfrkb-S-4	ISM	Cluster1
PB.28982.273	Rsl1d1	Rsl1d1-S-273	ISM	Cluster1
PB.69977.19	Mob2	Mob2-FL-19	NNC	Cluster1
PB.69031.4	Anks4b	Anks4b-S-4	NNC	Cluster1
PB.77094.64	Mei4	Mei4-S-64	NNC	Cluster1
PB.8416.22	Cradd	Cradd-FL-22	NIC	Cluster1
PB.46274.4	E2f5	E2f5-FL-4	FSM	Cluster1
PB.33379.18	Gm42418	Gm42418-S-18	FSM	Cluster1
PB.50924.37	Dnaja1	Dnaja1-S-37	ISM	Cluster1
PB.73029.161	Nae1	Nae1-S-161	ISM	Cluster1
PB.26275.107	Rrm2b	Rrm2b-FL-107	FSM	Cluster1
PB.7534.29	Gm5134	Gm5134-S-29	NNC	Cluster1
PB.30205.43	Popdc2	Popdc2-S-43	FSM	Cluster1
PB.78078.1046	Fbxw28	Fbxw28-S-1046	ISM	Cluster1
PB.3756.109	Aspm	Aspm-S-109	ISM	Cluster1
PB.38369.7	Cep78	Cep78-FL-7	ISM	Cluster1
PB.65419.34	Obox2	Obox2-FL-34	NNC	Cluster1
PB.24515.81	Fndc3a	Fndc3a-S-81	ISM	Cluster1
PB.45588.1	Rtf2	Rtf2-S-1	ISM	Cluster1
PB.44682.309	Eif2s2	Eif2s2-S-309	FSM	Cluster1
PB.40267.95	Rbm17	Rbm17-S-95	ISM	Cluster1
PB.20066.70	Dek	Dek-S-70	ISM	Cluster1
PB.46108.81	Il7	Il7-S-81	ISM	Cluster1
PB.43383.2	Nusap1	Nusap1-S-2	ISM	Cluster1
PB.49656.71	Adh5	Adh5-S-71	ISM	Cluster1
PB.24989.41	Lmo7	Lmo7-S-41	NIC	Cluster1
PB.24011.3	Cryl1	Cryl1-S-3	ISM	Cluster1
PB.55860.7	Orc5	Orc5-FL-7	ISM	Cluster1
PB.39442.2	Slf2	Slf2-S-2	ISM	Cluster1
PB.65239.104	Nlrp4b	Nlrp4b-FL-104	ISM	Cluster1
PB.1569.3	Nop58	Nop58-S-3	ISM	Cluster1
PB.7300.5	Arid5b	Arid5b-S-5	NNC	Cluster1
PB.66057.92	Nlrp9a	Nlrp9a-S-92	ISM	Cluster1
PB.44472.3	Csnk2a1	Csnk2a1-S-3	ISM	Cluster1
PB.56153.26	Dnajb6	Dnajb6-S-26	ISM	Cluster1
PB.46658.36	Mrpl47	Mrpl47-S-36	FSM	Cluster1
PB.56153.4	Dnajb6	Dnajb6-FL-4	FSM	Cluster1
PB.21680.37	Nsa2	Nsa2-S-37	ISM	Cluster1
PB.24657.72	Tsc22d1	Tsc22d1-FL-72	NNC	Cluster1
PB.33767.125	Dazl	Dazl-FL-125	FSM	Cluster1
PB.7935.5	Tle6	Tle6-FL-5	FSM	Cluster1
PB.60079.6	A430033K04Rik	A430033K04Rik-S-6	FSM	Cluster1
PB.58041.3	Plac8	Plac8-FL-3	NNC	Cluster1
PB.23556.39	Ktn1	Ktn1-S-39	ISM	Cluster1
PB.26425.10	Eny2	Eny2-S-10	FSM	Cluster1
PB.26109.112	Laptm4b	Laptm4b-S-112	ISM	Cluster1
PB.21216.32	Glrx	Glrx-S-32	NNC	Cluster1
PB.13345.76	Luc7l3	Luc7l3-S-76	ISM	Cluster1
PB.11283.395	Ccdc69	Ccdc69-S-395	FSM	Cluster1
PB.50978.91	Ubap2	Ubap2-S-91	ISM	Cluster1
PB.66058.296	Nlrp9c	Nlrp9c-S-296	NIC	Cluster1
PB.16975.3	Jkamp	Jkamp-FL-3	NIC	Cluster1
PB.48472.3	Txnip	Txnip-S-3	ISM	Cluster1
PB.12804.2	Zfp830	Zfp830-S-2	FSM	Cluster1
PB.44983.5	Top1	Top1-S-5	ISM	Cluster1
PB.11283.398	Ccdc69	Ccdc69-S-398	ISM	Cluster1
PB.78814.64	Clcn5	Clcn5-S-64	NNC	Cluster1
PB.16804.2	Gm47432	Gm47432-S-2	ISM	Cluster1
PB.39613.101	Pcgf6	Pcgf6-S-101	ISM	Cluster1
PB.67846.119	Prc1	Prc1-S-119	FSM	Cluster1
PB.78709.668	mt-Co3	mt-Co3-S-668	FSM	Cluster1
PB.52105.80	Mllt3	Mllt3-S-80	ISM	Cluster1
PB.77903.1	Nprl2	Nprl2-FL-1	FSM	Cluster1
PB.16616.6	C87198	C87198-S-6	FSM	Cluster1
PB.11178.13	Zcchc10	Zcchc10-FL-13	FSM	Cluster1
[truncated: 4,820 more rows]
