# Supplementary material for: Single-cell full-length isoform sequencing reveals an abundance of 3’ prime partial transcripts in maternally inherited RNAs
Source: Research Square preprint supplement (doi:10.21203/rs.3.rs-1752209/v1), 2022-06-15
Supplement: Supplementary file 4 [file 6f525241c0714709de505d5d.xlsx]

## Sheet: Extended data table 3
Raw PB ID	Gene name	IsoformID	Isoform type by SQANTI3	Oocyte1	Oocyte2	Oocyte3	Oocyte4	Oocyte5	Oocyte6	Oocyte7	Oocyte8	Oocyte9	Oocyte10	Zygote1	Zygote2	Zygote3	Zygote4	Zygote5	Zygote6	Zygote7	Zygote8	Zygote9	E2C_1_1	E2C_1_2	E2C_2_1	E2C_2_2	E2C_3_1	E2C_3_2	E2C_4_1	E2C_4_2	E2C_5_1	E2C_5_2	L2C_1_1	L2C_2_1	L2C_2_2	L2C_3_1	L2C_3_2	L2C_4_1	L2C_4_2	L2C_5_1	L2C_5_2	L2C_6_1	L2C_6_2	4cell_1_1	4cell_1_2	4cell_1_3	4cell_1_4	4cell_2_1	4cell_2_3
PB.53730.94	Zcchc17	Zcchc17-S-94	NIC	1.86468	0	2.11911	2.16213	2.2995	1.96174	0	0	0	0	1.99726	2.41757	3.32743	2.76866	0	0	0	3.01892	0	0	0	0	0	0	0	0	0	0	0	0	0	0	0	0	0	0	0	0	0	0	0	0	0	0	0	0
PB.63871.96	Bms1	Bms1-S-96	ISM	0	2.04954	0	0	0	0	0	0	0	0	1.99726	1.80981	2.04338	0	0	0	0	2.01354	0	0	0	0	0	0	0	0	0	0	0	0	0	0	0	0	0	0	0	0	0	0	0	0	0	0	0	0
PB.35826.94	Pkd2l2	Pkd2l2-S-94	FSM	0	0	2.11911	0	0	0	0	0	0	0	0	0	0	0	2.23382	2.27886	0	2.01354	0	0	0	0	0	0	0	0	0	2.87225	0	0	0	0	0	0	0	0	0	0	0	0	0	0	0	0	0	0
PB.63260.2	Ccdc174	Ccdc174-S-2	FSM	1.86468	0	2.75031	2.16213	0	0	0	0	0	0	1.99726	1.80981	2.04338	0	1.64244	0	1.57395	0	0	0	0	0	0	0	0	0	0	0	0	0	0	0	0	0	0	0	0	0	0	0	0	0	0	0	0	0
PB.33401.31	Cenpq	Cenpq-S-31	ISM	0	2.04954	2.11911	0	0	0	0	0	0	0	2.62014	2.79287	3.32743	3.15298	1.64244	3.80283	0	0	1.92483	0	0	0	0	0	0	0	0	0	0	0	0	0	0	0	0	0	0	0	0	0	0	0	0	0	0	0
PB.34793.1	Camkmt	Camkmt-S-1	ISM	1.86468	0	0	0	0	0	0	0	0	0	0	0	0	0	0	0	0	0	0	0	0	0	0	0	0	0	2.80904	0	0	0	0	0	3.10739	0	0	0	0	0	0	4.01592	0	0	0	0	0	0
PB.76916.29	Scg3	Scg3-S-29	ISM	0	0	0	0	3.3289	0	2.09948	0	0	0	2.62014	1.80981	3.54337	3.42993	2.87192	3.58524	1.57395	3.01892	0	0	0	0	0	0	0	0	0	0	0	0	0	0	0	0	0	0	0	0	0	0	0	0	3.6987	0	0	0
PB.45588.1	Rtf2	Rtf2-S-1	ISM	1.86468	2.67612	0	0	3.60758	0	2.72941	0	2.19357	0	1.99726	2.79287	3.32743	3.82454	1.64244	3.80283	1.57395	2.01354	2.54223	0	0	0	0	0	0	0	0	0	0	0	0	0	0	0	0	0	0	0	0	0	0	0	0	0	0	0
PB.24831.132	Diaph3	Diaph3-S-132	ISM	0	2.67612	0	0	0	0	0	0	0	0	3.00104	0	2.04338	0	0	0	0	2.01354	0	0	0	0	0	0	0	2.71216	0	0	0	0	0	0	0	0	0	0	0	0	0	0	0	0	0	0	0	0
PB.64532.182	E330021D16Rik	E330021D16Rik-S-182	FSM	3.91372	4.12518	0	2.16213	3.3289	2.96193	2.09948	0	0	0	3.81951	3.27889	3.87154	3.42993	2.60293	0	1.57395	2.01354	0	0	0	0	0	0	0	0	0	2.87225	0	0	0	0	0	0	0	0	0	0	0	0	0	0	0	0	0	0
PB.49930.4	Fubp1	Fubp1-S-4	ISM	1.86468	0	2.11911	2.16213	2.2995	1.96174	0	2.055	0	0	1.99726	0	3.87154	2.13636	1.64244	2.27886	1.57395	2.01354	2.54223	0	0	0	0	0	0	0	0	0	0	0	0	0	0	0	0	0	0	0	0	0	0	0	0	0	0	0
PB.34198.103	Ralbp1	Ralbp1-S-103	ISM	0	0	2.75031	0	0	0	2.09948	0	0	0	3.27621	1.80981	3.72086	2.13636	2.23382	2.27886	1.57395	2.63759	2.54223	0	0	0	0	0	0	0	0	0	0	0	0	0	0	0	0	0	0	0	0	0	0	0	0	0	0	0
PB.72477.74	Calr	Calr-S-74	FSM	2.47719	2.04954	2.11911	0	0	1.96174	0	2.055	0	0	2.62014	2.79287	3.32743	3.15298	3.08368	3.13174	0	2.01354	1.92483	2.84395	0	0	0	0	0	0	0	0	0	0	0	0	0	0	0	0	0	0	0	0	0	0	0	0	0	0
PB.10718.69	Rars	Rars-S-69	ISM	0	0	0	0	0	0	0	0	0	0	0	1.80981	0	2.13636	0	1.6832	0	0	0	0	0	0	0	0	0	0	0	0	0	0	0	3.99414	0	0	3.13018	4.14766	0	0	0	0	0	0	0	0	0	0
PB.17446.71	Rbm25	Rbm25-S-71	ISM	2.85426	3.05837	2.11911	0	3.3289	3.45185	2.09948	2.055	0	0	3.66901	4.284	3.32743	3.97556	2.87192	4.53301	0	2.63759	1.92483	0	0	0	0	0	2.74483	0	0	0	0	0	0	0	0	0	0	0	0	0	0	0	0	0	0	0	0	0
PB.24844.5	Tdrd3	Tdrd3-S-5	ISM	0	2.04954	0	0	2.2995	0	0	0	0	0	2.62014	0	0	0	0	0	0	0	0	0	0	0	2.97402	0	0	0	0	2.87225	0	0	0	0	0	0	0	0	0	0	0	0	0	0	0	0	0	0
PB.2271.37	Mff	Mff-S-37	FSM	0	0	0	0	0	0	0	0	0	0	1.99726	1.80981	0	2.13636	1.64244	1.6832	0	0	0	0	0	0	0	0	0	0	0	0	0	0	0	0	0	0	0	0	0	0	0	0	0	0	0	0	0	0
PB.1216.129	Slc39a10	Slc39a10-S-129	ISM	1.86468	2.67612	2.11911	0	2.2995	0	0	0	0	0	0	0	3.32743	2.13636	0	1.6832	0	0	0	0	0	0	0	0	0	0	0	0	0	0	0	0	0	0	0	0	0	0	0	0	0	0	0	0	0	0
PB.35895.16	Ctnna1	Ctnna1-S-16	FSM	0	2.04954	0	0	0	0	0	0	0	0	1.99726	0	2.66954	2.13636	1.64244	0	0	0	0	2.84395	0	0	0	0	0	0	0	0	0	0	0	0	0	0	0	0	0	0	0	0	0	0	0	0	0	0
PB.63564.41	Trnt1	Trnt1-S-41	ISM	0	0	2.11911	0	0	0	0	0	0	0	0	0	0	0	0	0	0	0	0	0	0	0	0	0	0	0	0	0	0	0	0	0	0	0	0	0	0	0	0	0	0	0	0	0	0	0
PB.49933.595	Nexn	Nexn-S-595	ISM	1.86468	2.67612	0	0	2.2995	0	0	0	0	0	1.99726	1.80981	3.05164	2.13636	0	1.6832	0	3.01892	1.92483	0	0	0	0	0	2.74483	0	0	0	0	0	0	0	0	0	0	0	0	0	0	0	0	0	0	0	0	0
PB.59545.8	Sfswap	Sfswap-S-8	ISM	0	2.04954	2.11911	0	0	0	0	0	0	0	1.99726	0	3.05164	0	0	0	0	2.01354	0	0	0	0	0	0	0	0	0	0	0	0	0	0	0	0	0	0	0	0	0	0	0	0	0	0	0	0
PB.49262.2	Dnttip2	Dnttip2-S-2	ISM	1.86468	2.04954	3.13424	0	2.94119	2.58199	2.72941	2.055	0	2.1791	3.95029	3.06512	3.32743	3.64657	3.25834	3.89611	0	3.51002	1.92483	0	0	0	0	0	0	0	0	0	0	0	0	0	0	0	0	0	0	0	0	0	3.88458	0	0	0	0	0
PB.15140.4	Fasn	Fasn-S-4	FSM	0	0	0	2.16213	0	0	0	0	0	0	0	0	2.04338	0	0	0	0	0	1.92483	0	0	0	0	0	0	0	0	0	0	0	0	0	0	0	0	0	0	0	0	0	0	0	0	0	0	0
PB.59627.105	Sbds	Sbds-S-105	ISM	0	0	2.11911	0	0	0	0	0	0	0	1.99726	2.41757	3.05164	2.76866	0	1.6832	1.57395	0	0	0	0	0	0	0	0	0	0	0	0	0	0	0	0	0	0	0	0	0	0	0	0	0	0	0	0	0
PB.18166.35	Papola	Papola-S-35	NNC	1.86468	0	0	0	0	0	2.09948	0	0	0	0	0	0	0	0	0	0	0	0	0	0	0	0	0	0	0	0	0	0	0	0	0	0	3.24901	0	0	0	0	0	0	0	0	0	0	0	0
PB.10934.229	Timd2	Timd2-S-229	NNC	1.86468	2.04954	2.11911	0	0	0	0	0	0	0	0	0	0	0	0	0	0	0	0	0	0	0	0	0	2.74483	0	0	0	0	0	0	3.31925	0	3.24901	3.80123	3.47019	0	2.96822	0	3.61942	0	0	0	0	0	0
PB.15726.1	Asap2	Asap2-S-1	ISM	1.86468	3.33425	2.75031	0	3.3289	0	2.09948	0	2.19357	0	1.99726	0	3.05164	2.13636	0	0	0	0	0	0	0	0	0	0	0	0	0	0	0	0	0	0	0	0	0	0	0	0	0	0	0	0	0	0	0	0
PB.78794.114	Bmp15	Bmp15-S-114	FSM	0	0	0	0	0	0	0	0	0	0	0	0	2.04338	0	2.23382	1.6832	0	0	0	2.84395	0	4.1166	0	0	0	0	0	0	0	0	0	0	0	0	0	3.47019	0	0	0	0	0	0	0	0	0	0
PB.35918.91	Matr3	Matr3-S-91	ISM	0	2.04954	2.75031	0	0	0	0	2.055	0	0	0	1.80981	2.66954	2.13636	0	0	0	2.01354	0	0	0	0	0	0	0	0	0	0	0	0	0	0	0	0	0	0	0	0	0	0	0	0	0	0	0	0
PB.315.31	Terf1	Terf1-S-31	ISM	0	0	0	0	2.2995	1.96174	0	0	0	0	0	1.80981	2.04338	0	1.64244	2.27886	0	0	0	0	0	0	0	0	0	0	0	0	0	0	0	0	0	0	3.13018	4.14766	3.11271	0	0	0	0	0	0	0	0	0
PB.964.100	Txndc9	Txndc9-S-100	ISM	0	0	0	0	0	0	0	0	0	0	1.99726	2.79287	3.54337	0	2.60293	1.6832	0	0	0	0	0	0	0	0	0	2.71216	3.4716	0	0	0	0	0	0	0	0	0	0	0	0	0	0	0	0	0	0	0
PB.67005.202	Rpl13a	Rpl13a-S-202	FSM	0	0	0	0	0	0	0	0	0	0	0	0	0	2.13636	0	0	0	2.01354	0	0	0	0	0	0	0	0	0	0	0	0	0	0	0	0	0	0	0	0	0	0	0	0	0	0	0	0
PB.18116.87	Dicer1	Dicer1-S-87	NNC	3.34178	4.69344	4.08749	2.79601	4.68795	3.23659	2.72941	0	2.82934	2.81401	2.62014	3.60454	4.31593	3.97556	3.93208	4.78193	3.32431	3.68734	3.41016	0	0	0	0	0	0	0	0	0	0	0	0	0	0	0	0	0	0	0	0	0	0	0	0	0	0	0
PB.36022.3	Ik	Ik-S-3	ISM	1.86468	2.04954	2.11911	0	0	0	0	0	0	0	1.99726	1.80981	2.04338	0	1.64244	2.6496	2.15772	0	0	0	0	0	0	0	0	0	0	0	0	0	0	0	0	0	0	0	0	0	0	0	0	0	0	0	0	0
PB.80591.12	Pcyt1b	Pcyt1b-S-12	NNC	0	0	2.75031	0	0	0	2.09948	0	0	0	1.99726	2.41757	0	0	0	0	0	2.63759	0	0	0	0	0	0	0	0	0	0	0	0	0	0	0	0	0	0	0	0	0	0	0	0	0	0	0	0
PB.5090.32	Eprs	Eprs-S-32	ISM	0	2.04954	0	0	2.2995	1.96174	0	0	0	0	3.49177	3.06512	2.66954	2.13636	1.64244	3.69994	0	0	0	0	0	0	0	0	0	0	0	0	0	0	0	0	0	0	0	0	0	0	0	0	0	0	0	0	0	0
PB.11124.15	Skp1a	Skp1a-S-15	ISM	3.12744	2.67612	4.88905	3.18091	4.40333	2.96193	0	2.68196	0	0	3.95029	3.73467	3.87154	3.82454	1.64244	4.06003	1.57395	2.01354	0	0	0	0	0	0	2.74483	0	0	0	0	0	0	0	0	0	0	0	0	0	0	0	0	0	0	0	0	0
PB.52425.3	Leprot	Leprot-S-3	FSM	0	0	0	0	0	0	0	2.055	0	0	0	1.80981	0	0	0	0	0	0	0	0	0	0	0	0	0	0	0	0	0	0	0	0	0	0	0	0	0	0	0	0	0	0	0	0	0	0
PB.13589.89	Kpnb1	Kpnb1-S-89	ISM	0	0	0	0	0	0	0	0	0	0	0	0	0	0	0	0	0	0	0	0	0	0	2.97402	0	0	0	0	0	0	0	0	0	0	0	3.80123	0	0	0	0	0	0	0	0	0	0	0
PB.55337.2	Cdk11b	Cdk11b-S-2	ISM	2.47719	2.67612	2.11911	3.18091	2.2995	2.58199	2.09948	0	0	2.1791	3.27621	3.27889	3.32743	3.82454	2.23382	3.13174	1.57395	2.63759	0	0	0	0	2.97402	0	0	0	0	0	0	0	0	0	0	0	0	0	0	0	0	0	0	0	0	0	0	0
PB.62944.18	Pradc1	Pradc1-S-18	NIC	0	0	0	0	0	0	0	0	0	0	0	0	0	0	0	0	0	0	0	0	0	0	0	0	0	0	0	0	0	0	0	0	0	3.24901	0	3.47019	3.11271	0	3.11123	0	0	0	0	0	0	0
PB.74605.7	Taf1d	Taf1d-S-7	FSM	1.86468	0	2.11911	0	2.94119	0	0	0	0	0	2.62014	1.80981	2.04338	2.76866	0	3.13174	0	2.01354	0	0	0	0	0	0	0	0	0	0	0	0	0	0	3.77792	0	0	0	0	0	0	0	0	0	0	0	0	0
PB.38131.1	Ahnak	Ahnak-S-1	FSM	0	0	0	0	0	0	0	0	0	0	0	0	0	0	0	0	0	0	0	0	0	0	0	0	0	0	0	0	0	0	0	0	0	0	0	0	0	0	0	0	0	0	0	0	0	0
PB.44983.1	Top1	Top1-S-1	ISM	0	2.67612	0	2.16213	0	0	0	0	0	0	0	1.80981	2.04338	0	0	1.6832	0	0	0	0	0	0	0	0	0	0	0	0	0	0	0	0	0	0	0	0	0	0	0	0	0	0	0	0	0	0
PB.23396.3	Gm21154	Gm21154-S-3	NNC	1.86468	0	2.11911	2.79601	0	1.96174	0	0	0	2.1791	0	0	0	0	0	0	0	0	0	2.84395	0	0	0	0	0	0	2.80904	0	0	0	0	0	0	0	0	0	0	0	0	0	0	0	0	0	0	0
PB.16552.6	Srp54b	Srp54b-S-6	ISM	0	0	0	0	0	1.96174	0	0	0	0	1.99726	0	2.04338	0	0	0	0	0	0	0	0	3.43962	0	0	2.74483	0	0	0	0	0	0	0	0	0	0	0	0	0	0	0	0	0	0	0	0	0
PB.79493.65	Upf3b	Upf3b-S-65	ISM	2.85426	2.67612	2.11911	2.16213	0	2.58199	0	0	0	0	3.00104	1.80981	3.54337	3.82454	2.23382	3.58524	1.57395	0	0	0	0	0	0	0	0	0	0	0	0	0	0	0	0	0	0	0	0	0	0	0	0	0	0	0	0	0
PB.54772.139	Zfp980	Zfp980-S-139	FSM	0	0	0	0	0	0	0	0	0	0	0	0	0	0	0	0	0	0	0	0	0	0	0	0	0	0	0	0	0	0	0	0	0	0	0	0	0	0	0	0	0	0	0	0	0	0
PB.39840.236	Ccdc186	Ccdc186-S-236	ISM	0	0	0	0	2.2995	0	0	0	0	0	0	0	0	0	1.64244	1.6832	0	2.01354	0	0	0	0	0	0	2.74483	0	0	0	0	0	0	0	0	0	0	0	0	0	0	0	0	0	0	0	0	0
PB.49933.552	Nexn	Nexn-S-552	ISM	2.85426	4.48792	3.41098	2.16213	4.15551	3.62887	0	0	2.82934	0	3.49177	4.284	4.62251	3.15298	4.15129	4.20083	1.57395	4.08443	3.41016	2.84395	0	0	0	0	3.40532	0	0	2.87225	0	0	0	0	0	0	0	0	0	0	0	0	0	0	0	0	0	0
PB.31760.9	Tcp1	Tcp1-S-9	ISM	1.86468	3.33425	3.13424	0	2.94119	0	0	0	0	2.1791	1.99726	0	2.04338	0	0	2.91945	0	2.01354	0	0	0	0	0	0	0	0	0	0	0	0	0	0	0	0	0	0	0	0	0	0	0	0	0	0	0	0
PB.8026.5	D10Wsu102e	D10Wsu102e-S-5	ISM	1.86468	0	0	0	0	0	0	0	0	0	1.99726	0	2.04338	2.13636	1.64244	2.27886	0	0	0	0	0	0	0	0	0	0	0	0	0	0	0	0	0	0	0	0	0	0	0	0	0	0	0	0	0	0
PB.42109.53	Dync1i2	Dync1i2-S-53	NNC	2.47719	2.04954	0	0	2.2995	1.96174	0	0	0	0	1.99726	0	2.04338	0	2.23382	2.6496	0	0	0	0	0	0	0	0	0	0	0	0	0	0	0	0	0	0	0	0	0	0	0	0	0	0	0	0	0	0
PB.31040.176	Cct8	Cct8-S-176	ISM	2.47719	0	2.11911	0	0	0	0	0	0	0	1.99726	0	0	2.13636	0	2.6496	0	0	0	0	0	0	0	0	0	0	0	0	0	0	0	0	0	0	0	0	0	0	0	0	0	0	0	0	0	0
PB.44682.293	Eif2s2	Eif2s2-S-293	ISM	5.43835	5.60423	5.90587	4.68817	5.66301	5.45209	3.93443	4.2351	4.2864	3.19929	5.7049	5.69487	6.12628	6.17168	5.74806	6.529	3.92659	5.37139	5.10541	2.84395	0	3.43962	3.64129	0	4.08173	0	0	0	0	0	0	3.31925	3.10739	0	0	0	3.11271	0	0	0	0	5.21533	0	4.56999	0	0
PB.68724.270	Tmem41b	Tmem41b-S-270	FSM	0	0	0	0	0	0	0	0	0	0	0	0	0	0	0	0	0	0	0	0	0	0	0	0	0	0	0	0	0	0	0	0	0	0	0	0	0	0	0	0	3.88458	0	4.3794	0	0	0
PB.22648.9	Nkiras1	Nkiras1-S-9	ISM	0	2.04954	2.75031	0	0	0	0	0	0	0	1.99726	2.79287	2.04338	0	0	3.13174	1.57395	0	0	0	0	0	0	0	0	0	0	0	0	0	0	0	0	0	0	0	0	0	0	0	0	0	0	0	0	0
PB.12216.4	Zfp616	Zfp616-S-4	FSM	1.86468	0	2.11911	0	0	1.96174	0	0	2.19357	0	0	0	0	0	0	2.27886	1.57395	0	1.92483	0	0	0	0	0	0	0	0	0	0	0	0	0	0	0	0	0	0	0	0	0	0	0	0	0	0	0
PB.18355.235	Hsp90aa1	Hsp90aa1-S-235	ISM	0	2.67612	0	0	2.2995	0	0	0	0	0	3.00104	1.80981	2.66954	0	0	1.6832	0	0	0	0	2.99065	0	0	0	0	0	0	0	0	0	0	0	0	0	0	0	0	0	0	0	0	0	0	0	0	0
PB.13589.65	Kpnb1	Kpnb1-S-65	ISM	0	0	0	0	0	0	0	0	0	0	0	0	0	0	1.64244	0	0	0	0	0	0	0	0	0	0	0	0	0	0	0	3.01019	0	0	0	0	0	0	0	0	0	0	0	0	0	4.19825	0
PB.45537.122	Pfdn4	Pfdn4-S-122	NNC	1.86468	2.04954	0	2.16213	3.3289	0	0	0	2.19357	2.1791	1.99726	1.80981	0	0	0	2.27886	0	0	0	0	2.99065	0	2.97402	0	0	0	2.80904	3.93241	0	0	0	0	0	0	0	0	0	0	0	0	0	0	0	0	0	0
PB.82052.55	Txlng	Txlng-S-55	ISM	0	0	2.11911	0	0	0	0	2.055	0	0	3.00104	1.80981	0	2.13636	2.60293	2.6496	0	2.01354	0	0	0	0	0	0	0	0	0	0	0	0	0	0	0	0	0	0	0	0	0	0	0	0	0	0	0	0
PB.958.26	Eif5b	Eif5b-S-26	ISM	1.86468	2.67612	2.11911	0	2.2995	0	0	0	0	0	0	1.80981	3.05164	0	2.23382	2.27886	0	2.01354	2.54223	0	0	0	0	0	0	0	0	0	0	0	0	0	0	0	0	0	0	0	0	0	0	0	0	0	0	0
PB.71765.53	Tma16	Tma16-S-53	FSM	1.86468	0	2.75031	0	0	2.58199	0	0	0	0	0	0	2.04338	2.13636	0	0	0	0	0	0	0	0	0	0	0	0	0	0	0	0	0	0	0	0	0	0	0	0	0	0	0	0	0	0	0	0
PB.13345.61	Luc7l3	Luc7l3-S-61	ISM	0	0	0	0	0	0	0	0	0	0	1.99726	1.80981	0	0	1.64244	1.6832	0	2.63759	0	0	0	0	0	0	0	0	0	0	0	0	0	0	0	0	0	0	0	0	0	0	0	0	0	0	0	0
PB.24989.41	Lmo7	Lmo7-S-41	NIC	1.86468	3.72776	2.11911	0	2.94119	0	0	0	0	0	2.62014	3.45491	3.05164	3.15298	1.64244	3.80283	0	3.01892	1.92483	0	0	0	0	0	0	0	0	0	0	0	0	0	0	0	0	0	0	0	0	0	0	0	0	0	0	0
PB.60440.42	Pdap1	Pdap1-S-42	ISM	3.79843	3.33425	3.80538	2.16213	3.60758	2.96193	0	0	0	2.1791	3.27621	1.80981	2.66954	4.10675	2.23382	3.45567	0	2.63759	2.54223	0	0	0	3.64129	0	0	0	0	0	0	0	0	0	0	0	0	0	0	0	0	0	0	4.12752	0	0	0	0
PB.26695.6	Tatdn1	Tatdn1-S-6	FSM	0	0	2.11911	0	0	0	0	0	0	0	1.99726	0	0	0	0	1.6832	0	0	0	0	0	0	0	0	0	0	0	0	0	0	0	0	0	0	0	0	0	0	4.1797	0	0	0	0	0	0	0
PB.71752.592	Trim61	Trim61-S-592	NNC	1.86468	2.67612	2.11911	0	0	0	0	0	0	0	0	0	0	2.13636	0	0	1.57395	0	0	0	0	0	0	0	0	0	0	0	0	0	0	0	0	0	0	0	0	0	0	0	0	0	0	0	0	0
PB.65426.16	Obox5	Obox5-S-16	ISM	1.86468	2.04954	2.11911	0	2.2995	0	0	0	0	0	0	1.80981	2.04338	2.13636	1.64244	3.13174	0	0	0	0	0	0	0	0	2.74483	0	0	0	0	0	0	0	0	0	0	0	0	0	0	0	0	0	0	0	0	0
PB.38364.61	Psat1	Psat1-S-61	NIC	0	0	0	0	0	0	0	0	0	0	0	0	0	0	0	0	0	0	0	0	0	0	0	0	0	0	0	0	0	0	0	0	3.10739	0	0	3.47019	0	0	0	4.01592	0	0	0	0	0	0
PB.39611.1	Taf5	Taf5-S-1	ISM	0	0	0	0	0	0	0	0	0	0	0	0	0	0	0	0	0	0	0	0	0	0	0	0	0	0	0	0	0	0	0	0	0	0	3.13018	4.14766	3.78336	0	0	0	0	0	0	0	0	0
PB.36.4	Tcea1	Tcea1-S-4	ISM	0	0	0	0	0	0	0	0	0	0	2.62014	1.80981	2.04338	2.13636	0	2.27886	0	2.01354	1.92483	0	0	0	0	0	0	0	0	0	0	0	0	0	0	0	0	0	0	0	0	0	0	0	0	0	0	0
PB.46582.25	Sec62	Sec62-S-25	FSM	0	2.04954	2.11911	0	0	0	0	0	0	0	2.62014	1.80981	2.66954	2.13636	0	0	0	0	0	0	0	0	0	0	0	0	0	0	0	0	0	0	0	0	0	0	0	0	0	0	0	0	0	0	0	0
PB.35259.205	Rock1	Rock1-S-205	ISM	1.86468	2.04954	0	0	0	1.96174	0	0	0	0	0	0	3.05164	0	2.23382	2.27886	1.57395	3.29432	1.92483	0	0	0	0	0	0	0	0	0	0	0	0	0	0	0	0	0	0	0	0	0	0	0	0	0	0	0
PB.26120.7	Erich5	Erich5-S-7	ISM	0	0	0	0	0	1.96174	0	0	0	0	1.99726	0	0	0	1.64244	2.27886	1.57395	0	0	0	0	0	0	0	0	0	0	0	0	0	0	0	0	0	0	0	0	0	0	0	0	0	0	0	0	0
PB.21014.28	Gm48423	Gm48423-S-28	FSM	0	0	2.11911	0	0	0	0	0	0	0	0	1.80981	0	0	0	0	1.57395	2.63759	1.92483	0	0	0	0	0	3.40532	2.71216	3.4716	2.87225	0	0	3.01019	4.67804	4.45957	5.2939	4.88483	4.54785	3.78336	4.86908	4.46354	4.70001	5.65906	4.81257	5.06626	5.81532	5.79559	5.554
PB.30176.2	Gm36028	Gm36028-S-2	NNC	0	0	0	0	0	0	0	0	0	0	0	0	0	0	0	0	0	0	0	0	0	0	0	0	0	0	0	0	0	0	0	0	0	0	0	0	0	0	0	0	0	0	0	0	0	0
PB.958.8	Eif5b	Eif5b-S-8	ISM	3.79843	3.87847	2.11911	3.67498	4.00396	2.58199	3.11288	0	0	2.1791	2.62014	4.04659	4.31593	4.10675	3.40699	4.48476	3.17614	3.83791	2.54223	0	0	0	0	0	0	0	0	0	0	0	0	0	0	0	0	0	0	0	0	0	0	0	0	0	0	0
PB.63780.64	Rpl32	Rpl32-S-64	FSM	1.86468	0	0	0	0	0	0	2.055	0	0	0	0	0	0	0	1.6832	0	0	0	0	0	0	0	0	3.40532	0	0	0	0	0	0	0	0	0	0	0	0	0	0	0	0	0	0	0	0	0
PB.40993.222	Set	Set-S-222	ISM	0	0	0	0	0	0	0	0	0	0	0	0	0	0	0	1.6832	0	0	0	0	0	0	0	0	0	0	0	0	0	0	0	0	3.10739	3.24901	0	0	0	0	0	2.95272	0	0	0	0	0	0
PB.54823.259	Zfp982	Zfp982-S-259	NNC	0	0	0	0	0	0	0	0	0	0	0	0	0	0	0	0	0	0	0	0	0	0	0	0	0	0	0	0	0	0	0	0	0	0	0	0	3.78336	2.96822	0	0	0	0	0	0	0	0
PB.75268.225	Chek1	Chek1-S-225	ISM	0	2.04954	0	0	0	0	0	0	0	0	1.99726	1.80981	2.66954	2.13636	1.64244	2.6496	0	2.01354	0	0	0	0	0	0	0	0	0	0	0	0	0	0	0	0	0	0	0	0	0	0	0	0	0	0	0	0
PB.58431.112	Zfp932	Zfp932-S-112	FSM	0	0	0	0	0	0	0	0	0	0	0	0	0	0	0	1.6832	0	0	0	0	0	0	0	0	2.74483	0	0	0	0	0	3.01019	0	0	0	0	0	0	0	0	0	0	0	3.6987	0	0	0
PB.22320.55	Paip1	Paip1-S-55	ISM	1.86468	2.04954	0	0	0	0	0	0	0	0	1.99726	0	0	0	2.23382	1.6832	1.57395	2.01354	0	0	0	0	0	0	0	0	0	2.87225	0	0	0	0	0	0	0	0	0	0	0	0	0	0	0	0	0	0
PB.28809.21	Eef2kmt	Eef2kmt-S-21	FSM	0	0	0	0	0	0	0	0	0	0	0	0	0	0	0	0	0	0	0	0	0	0	0	0	0	0	0	0	0	0	0	0	0	0	0	0	0	0	0	0	3.88458	0	0	0	0	0
PB.3376.13	Slc45a3	Slc45a3-S-13	ISM	0	0	0	0	0	1.96174	0	0	0	0	0	0	0	0	1.64244	0	0	0	0	2.84395	0	0	2.97402	3.04884	4.08173	0	0	0	0	0	0	0	0	0	0	0	0	0	0	0	0	0	0	0	0	0
PB.80062.29	Fmr1nb	Fmr1nb-S-29	ISM	0	0	0	0	0	1.96174	0	0	0	0	0	0	0	0	0	1.6832	0	0	0	0	0	0	0	0	0	0	0	0	0	4.4043	0	0	0	0	0	3.47019	0	0	0	0	0	0	0	0	0	0
PB.14827.10	Snhg16	Snhg16-S-10	NIC	0	0	2.11911	0	0	0	0	0	0	0	0	0	0	0	0	0	0	0	0	0	0	0	0	0	0	0	0	0	0	0	0	0	0	0	0	0	3.78336	0	0	0	3.88458	0	0	3.88715	0	0
PB.27553.22	Phf5a	Phf5a-S-22	NNC	0	0	0	0	2.2995	0	2.09948	0	0	0	0	0	0	0	0	0	0	0	1.92483	0	0	0	0	0	0	0	0	0	0	0	0	0	0	3.24901	0	3.47019	0	0	0	0	0	0	0	0	0	0
PB.31733.41	Map3k4	Map3k4-S-41	FSM	2.47719	2.04954	2.11911	0	0	1.96174	0	0	0	0	2.62014	2.41757	2.04338	0	1.64244	2.27886	1.57395	0	0	0	0	0	0	0	0	0	0	0	0	0	0	0	0	0	0	0	0	0	0	0	0	0	0	0	0	0
PB.72540.80	4921524J17Rik	4921524J17Rik-S-80	FSM	1.86468	2.04954	2.11911	0	2.94119	0	2.09948	0	0	0	0	0	2.66954	2.13636	0	2.27886	0	0	0	0	0	3.43962	0	3.04884	3.79966	0	0	2.87225	0	0	0	3.31925	0	3.92256	0	3.47019	4.18122	3.63534	4.68438	2.95272	0	0	4.3794	0	0	0
PB.30995.10	Atp5j	Atp5j-S-10	NNC	0	0	0	0	0	0	0	0	0	0	0	0	0	0	0	0	0	0	0	0	0	0	0	0	0	0	0	0	0	0	0	0	0	0	0	0	0	0	0	0	0	0	0	0	0	0
PB.56907.5	Stim2	Stim2-S-5	NIC	1.86468	0	0	0	0	0	0	0	0	0	0	1.80981	0	0	1.64244	1.6832	1.57395	0	0	0	0	0	0	0	0	0	0	0	0	0	0	0	0	0	0	0	0	0	0	0	0	0	0	0	0	0
PB.62033.7	Stk31	Stk31-S-7	NNC	1.86468	0	0	0	0	1.96174	0	0	0	0	0	2.41757	2.66954	0	0	0	1.57395	0	0	0	0	0	0	0	2.74483	0	0	0	0	0	0	0	0	0	0	0	0	0	0	0	0	0	0	0	0	0
PB.50844.22	Lingo2	Lingo2-S-22	NNC	0	0	0	0	0	0	0	0	0	0	0	1.80981	0	0	2.23382	2.27886	0	0	0	2.84395	0	0	0	3.04884	0	0	0	0	0	0	0	0	0	0	0	0	0	0	0	0	0	0	0	0	0	0
PB.29688.7	Ccdc50	Ccdc50-S-7	ISM	1.86468	2.04954	2.11911	2.16213	0	0	0	0	2.19357	0	2.62014	2.41757	2.04338	2.13636	1.64244	0	0	2.01354	0	0	0	0	0	0	0	0	0	0	0	0	0	0	0	0	0	0	0	0	0	0	0	0	0	0	0	0
PB.33516.497	Hsp90ab1	Hsp90ab1-S-497	ISM	0	2.04954	2.11911	2.16213	2.2995	0	0	0	0	0	0	2.79287	2.66954	0	2.23382	0	1.57395	0	0	0	0	0	0	0	0	0	0	0	0	0	0	0	0	0	0	0	0	0	0	0	0	0	0	0	0	0
PB.75772.222	Btg4	Btg4-S-222	FSM	0	2.04954	0	0	0	0	0	0	0	0	1.99726	1.80981	2.04338	0	2.23382	0	0	0	0	0	0	0	0	0	3.40532	0	2.80904	0	0	0	0	0	0	0	0	0	0	0	0	0	0	0	0	0	0	0
PB.77728.34	Tmem108	Tmem108-S-34	ISM	0	0	0	0	0	0	0	0	0	0	1.99726	0	2.04338	2.76866	2.60293	2.27886	0	0	0	2.84395	0	0	0	3.04884	2.74483	0	0	0	0	0	0	0	0	0	0	0	0	0	0	0	0	0	0	0	0	0
PB.78639.48	1110059G10Rik	1110059G10Rik-S-48	FSM	1.86468	0	2.11911	2.16213	0	1.96174	0	2.055	0	0	3.27621	0	2.04338	2.13636	2.23382	3.13174	0	0	0	0	0	0	0	0	0	0	0	0	0	0	0	0	0	0	0	0	0	0	0	0	0	0	0	0	0	0
PB.59102.82	Atxn2	Atxn2-S-82	ISM	2.47719	0	0	2.16213	0	2.58199	2.72941	0	0	0	1.99726	0	0	0	2.23382	2.6496	2.15772	2.63759	2.54223	0	2.99065	0	0	3.71799	2.74483	0	0	2.87225	0	4.4043	0	0	3.10739	0	0	3.47019	0	0	0	2.95272	0	0	0	0	0	0
PB.44781.40	Phf20	Phf20-S-40	NNC	1.86468	0	0	0	0	0	2.72941	0	0	0	2.62014	0	2.04338	2.13636	2.60293	2.27886	1.57395	0	0	0	0	0	2.97402	0	0	0	0	0	0	0	0	0	0	0	0	0	0	0	0	0	0	0	0	0	0	0
PB.48339.10	Cers2	Cers2-S-10	FSM	0	0	0	0	0	0	0	0	0	0	0	0	0	0	0	0	0	0	0	0	0	0	0	0	0	0	0	0	0	0	0	0	0	0	0	0	0	0	0	0	0	0	0	0	0	0
PB.74332.5	Cwf19l2	Cwf19l2-S-5	ISM	1.86468	2.04954	0	0	0	0	0	0	0	0	1.99726	2.79287	3.72086	2.13636	2.60293	3.58524	0	0	1.92483	0	0	0	0	0	2.74483	0	0	0	0	0	0	0	0	0	0	0	0	0	0	0	0	0	0	0	0	0
PB.56459.39	Haus3	Haus3-S-39	FSM	1.86468	0	3.13424	0	0	0	2.09948	2.055	2.19357	2.1791	1.99726	0	0	2.13636	0	1.6832	0	3.01892	0	0	0	0	0	0	0	0	0	0	0	0	0	0	0	0	0	0	0	0	0	0	0	0	0	0	0	0
PB.35826.10	Pkd2l2	Pkd2l2-S-10	NNC	0	0	0	2.16213	0	1.96174	0	0	0	0	0	0	2.66954	0	2.23382	2.27886	0	2.01354	0	0	0	0	0	0	0	0	0	0	0	0	0	0	0	0	0	0	0	0	0	0	0	0	0	0	0	0
PB.54823.33	Rex2	Rex2-S-33	FSM	0	0	0	0	0	0	0	0	0	0	0	0	0	0	0	0	0	0	0	0	0	0	0	0	0	0	0	0	0	0	0	0	0	0	0	0	0	0	0	0	0	0	0	0	0	0
PB.77066.112	Senp6	Senp6-S-112	ISM	1.86468	0	0	2.16213	0	0	0	0	0	0	0	1.80981	0	0	0	2.91945	0	2.01354	0	0	0	3.43962	0	0	0	2.71216	0	0	0	0	0	0	3.10739	0	0	0	0	0	0	0	0	0	0	0	0	0
PB.44295.154	Crnkl1	Crnkl1-S-154	ISM	0	2.04954	2.11911	0	0	0	2.72941	0	0	0	1.99726	1.80981	2.04338	2.13636	2.60293	3.69994	0	0	0	0	0	0	0	0	0	0	0	0	0	0	0	0	0	0	0	0	0	0	0	0	0	0	0	0	0	0
PB.10934.170	Timd2	Timd2-S-170	NNC	0	0	0	0	0	0	0	0	0	0	0	0	0	0	0	0	0	0	0	0	0	0	0	0	0	0	0	0	0	0	0	0	0	0	0	3.47019	0	0	3.11123	3.61942	0	0	0	0	0	0
PB.69405.78	Rnf40	Rnf40-S-78	NIC	0	0	0	0	0	0	0	0	0	0	0	0	0	0	0	0	0	0	1.92483	0	0	0	2.97402	0	0	0	0	0	0	0	3.01019	0	3.10739	0	0	0	0	0	0	0	0	0	0	0	0	0
PB.81445.2	Fam199x	Fam199x-S-2	ISM	0	0	0	2.16213	0	1.96174	0	3.06435	0	0	0	1.80981	2.04338	0	1.64244	1.6832	2.15772	0	1.92483	0	0	0	0	0	0	0	2.80904	2.87225	0	0	0	0	0	0	0	0	0	0	0	0	0	0	0	0	0	0
PB.59203.161	Anapc5	Anapc5-S-161	ISM	0	0	2.11911	0	0	1.96174	0	0	0	0	2.62014	1.80981	2.04338	0	0	2.91945	0	2.01354	0	0	0	0	0	0	2.74483	0	0	0	0	0	0	0	0	0	0	0	0	0	0	0	0	0	0	0	0	0
PB.23556.55	Ktn1	Ktn1-S-55	ISM	0	2.04954	0	2.16213	0	1.96174	0	0	0	0	0	0	0	0	1.64244	1.6832	0	2.63759	1.92483	0	0	0	0	0	0	0	0	0	0	0	0	0	0	0	0	0	0	0	0	0	0	0	0	0	0	0
PB.17780.328	Gm10436	Gm10436-S-328	ISM	0	0	0	0	0	0	0	0	0	0	0	0	2.66954	0	1.64244	0	0	0	0	0	0	3.43962	0	0	2.74483	0	3.4716	3.93241	4.62482	0	0	0	0	0	0	0	0	0	0	0	0	0	0	0	0	0
PB.23078.2	Sfmbt1	Sfmbt1-S-2	NIC	0	0	0	0	0	1.96174	2.09948	0	0	0	0	1.80981	2.66954	0	0	0	0	0	1.92483	0	0	0	0	0	0	0	0	0	0	0	0	0	0	0	0	0	0	0	0	0	0	0	3.6987	0	0	0
PB.80784.20	Med12	Med12-S-20	FSM	0	0	0	0	0	1.96174	0	0	0	0	0	0	0	0	0	0	0	0	0	0	0	0	0	0	0	0	0	0	0	0	3.01019	3.31925	3.10739	0	0	0	0	0	0	0	0	0	0	0	0	0
PB.12843.25	Pex12	Pex12-S-25	FSM	0	0	0	2.16213	0	0	0	0	0	0	0	0	0	0	0	0	0	0	0	0	0	0	0	0	0	0	0	0	0	0	0	0	0	0	0	0	0	0	0	0	0	0	0	0	0	0
PB.66837.52	Zfp936	Zfp936-S-52	FSM	0	0	0	0	0	0	0	0	0	0	1.99726	1.80981	0	0	0	1.6832	0	0	0	0	2.99065	0	2.97402	0	0	0	0	0	0	0	3.01019	0	3.77792	0	0	3.47019	0	2.96822	0	0	0	0	0	0	4.19825	0
PB.78794.117	Bmp15	Bmp15-S-117	FSM	0	0	0	0	0	0	0	0	0	0	1.99726	1.80981	2.04338	0	1.64244	1.6832	0	0	0	0	2.99065	0	0	3.04884	0	0	2.80904	0	0	0	0	0	0	0	0	0	0	0	0	0	0	0	0	0	0	0
PB.67310.55	Nipa2	Nipa2-S-55	FSM	1.86468	0	0	0	0	0	0	0	0	0	0	0	0	0	0	0	0	0	0	0	0	0	0	0	0	0	0	0	0	0	3.01019	0	0	3.24901	3.13018	0	0	2.96822	0	0	0	0	0	3.88715	4.19825	0
PB.43681.130	Cops2	Cops2-S-130	ISM	0	0	2.11911	0	0	0	0	0	0	0	0	0	0	0	0	0	0	0	0	0	0	0	0	0	0	0	2.80904	0	0	0	0	0	0	0	3.13018	4.14766	0	0	0	0	0	0	0	0	0	0
PB.22720.50	Dnajc9	Dnajc9-S-50	FSM	0	0	2.11911	0	2.2995	0	0	0	0	0	0	1.80981	0	2.13636	0	2.27886	1.57395	0	2.54223	0	0	0	0	0	0	0	0	2.87225	0	0	0	0	0	0	0	0	0	0	0	0	0	0	0	0	0	0
PB.28795.84	Glyr1	Glyr1-S-84	ISM	0	0	0	0	2.94119	0	0	0	0	0	0	1.80981	3.05164	0	0	1.6832	0	2.01354	0	0	0	0	0	0	0	0	0	2.87225	0	0	0	0	0	0	0	0	0	0	0	0	0	0	0	0	0	0
PB.52401.56	Jak1	Jak1-S-56	ISM	1.86468	2.04954	0	0	3.82529	0	2.09948	0	0	0	3.27621	3.27889	2.66954	3.42993	2.87192	3.13174	1.57395	2.01354	0	0	0	0	0	0	0	0	0	0	0	0	0	0	0	0	0	0	0	0	0	0	0	0	0	0	0	0
PB.31037.2	Usp16	Usp16-S-2	ISM	1.86468	3.05837	2.11911	0	2.2995	1.96174	0	2.68196	0	2.1791	1.99726	2.41757	2.66954	2.13636	1.64244	3.45567	1.57395	3.29432	2.54223	0	0	0	0	0	0	0	0	0	0	0	0	0	0	0	0	0	0	0	0	0	0	0	0	0	0	0
PB.18444.3	Eif5	Eif5-S-3	ISM	4.11075	4.81021	4.48734	0	4.28708	2.96193	3.78354	2.68196	3.49252	3.47672	4.26348	4.53224	5.1294	5.31149	4.43503	4.919	3.56759	5.0124	3.98315	0	0	0	0	0	3.79966	0	2.80904	0	3.94143	0	0	0	3.10739	0	0	0	0	0	0	3.61942	0	4.12752	0	0	0	0
PB.2087.2	Stk16	Stk16-S-2	FSM	0	0	0	0	0	0	2.09948	0	0	0	0	0	0	0	0	0	0	0	0	0	0	0	0	0	0	0	0	0	0	0	0	0	0	0	4.19922	3.47019	3.11271	0	0	0	0	0	0	0	0	0
PB.37545.62	Rttn	Rttn-S-62	NNC	0	0	0	0	2.2995	0	0	0	2.19357	0	0	0	2.04338	0	0	1.6832	0	2.01354	0	0	0	0	0	0	0	0	2.80904	0	3.94143	0	0	0	0	0	0	0	0	0	0	0	0	0	0	0	0	0
PB.35626.61	Slc39a6	Slc39a6-S-61	ISM	1.86468	2.04954	2.11911	0	0	0	2.09948	0	2.19357	0	0	0	2.04338	2.13636	0	2.27886	0	2.01354	0	0	0	0	0	0	0	0	0	0	0	0	0	0	0	0	0	0	0	0	0	0	0	0	0	0	0	0
PB.72293.82	Abce1	Abce1-S-82	ISM	0	0	0	0	0	0	0	0	0	0	0	0	0	0	0	0	0	0	0	0	0	0	0	0	0	0	0	0	0	0	3.01019	0	0	0	3.80123	0	0	0	0	0	0	0	0	0	0	0
PB.36.197	Tcea1	Tcea1-S-197	ISM	0	0	2.11911	2.16213	0	0	2.09948	0	0	0	1.99726	0	0	0	1.64244	0	0	0	0	0	0	0	0	0	2.74483	0	0	0	3.94143	0	0	3.31925	0	0	0	0	3.11271	0	0	0	0	4.81257	0	0	0	0
PB.25046.29	Rnf219	Rnf219-S-29	ISM	2.47719	2.67612	3.13424	0	2.2995	2.96193	0	0	0	0	0	1.80981	3.05164	0	0	3.80283	0	0	1.92483	0	0	0	0	0	2.74483	0	0	0	0	0	0	0	0	0	0	0	0	0	0	0	0	0	0	0	0	0
PB.7962.3	AU041133	AU041133-S-3	FSM	0	0	0	0	0	0	0	0	0	0	0	0	0	0	0	0	0	0	0	0	0	0	0	0	0	0	0	0	0	0	0	0	0	0	0	0	0	0	0	0	0	0	0	0	0	0
PB.49564.2	Cenpe	Cenpe-S-2	ISM	0	2.04954	0	0	0	0	2.09948	0	0	0	1.99726	3.06512	2.04338	0	2.23382	0	0	2.63759	1.92483	0	0	0	0	0	0	0	0	0	0	0	0	0	0	0	0	0	0	0	0	0	0	0	0	0	0	0
PB.9462.4	Baz2a	Baz2a-S-4	NNC	0	2.04954	0	0	0	1.96174	0	0	0	0	1.99726	3.27889	2.04338	2.13636	1.64244	2.6496	1.57395	0	0	3.903	2.99065	3.43962	0	3.04884	3.40532	3.7655	3.4716	0	3.94143	0	0	0	0	0	0	0	0	0	0	0	0	0	0	0	0	0
PB.78709.823	mt-Nd5	mt-Nd5-S-823	FSM	5.19837	5.31777	5.90587	5.75661	5.24361	4.99506	4.86687	4.32909	4.79171	5.24238	5.87957	5.50633	5.7579	4.96217	4.96077	5.33267	4.39863	4.6524	3.8677	5.27404	4.73963	5.49059	5.32435	6.09356	6.0819	4.73175	4.95121	4.21519	5.02701	7.16536	5.52858	5.6837	6.28238	5.92016	5.7278	5.63937	6.70602	6.50048	5.77681	6.12019	6.16849	5.50165	5.62317	6.64032	6.1312	0
PB.30037.10	Ccdc14	Ccdc14-S-10	ISM	0	2.04954	2.11911	0	0	0	0	0	2.19357	0	0	0	2.04338	2.13636	1.64244	0	0	0	1.92483	0	0	0	0	0	0	0	0	0	0	0	0	0	0	0	0	0	0	0	0	0	0	0	0	0	0	0
PB.35826.162	Pkd2l2	Pkd2l2-S-162	NNC	1.86468	0	0	0	0	2.58199	0	0	0	0	1.99726	0	0	0	0	1.6832	0	0	1.92483	0	0	0	0	0	0	0	0	0	0	0	0	0	0	0	0	0	0	0	0	0	0	0	0	0	0	0
PB.66637.25	Pdcd5	Pdcd5-S-25	ISM	0	2.04954	2.11911	2.16213	2.94119	1.96174	0	0	2.19357	0	1.99726	2.41757	0	3.64657	2.60293	2.27886	0	2.01354	0	0	0	0	0	0	0	2.71216	0	0	0	0	0	0	0	0	0	0	0	0	0	2.95272	0	0	0	0	0	0
PB.45802.9	Gm14409	Gm14409-S-9	NNC	0	0	0	0	0	0	0	0	0	0	0	0	0	0	1.64244	0	0	0	0	0	0	0	0	0	0	0	0	0	0	0	0	0	0	0	0	0	0	0	0	0	0	0	0	0	0	0
PB.2476.5	Atg16l1	Atg16l1-S-5	FSM	0	0	2.75031	0	0	0	0	0	2.82934	0	0	1.80981	2.04338	2.13636	1.64244	1.6832	0	0	0	0	0	0	0	0	0	0	0	0	0	0	0	0	0	0	0	0	0	0	0	0	0	0	0	0	0	0
PB.77094.57	Mei4	Mei4-S-57	NNC	2.47719	0	2.75031	2.16213	0	0	2.09948	2.68196	3.21493	2.1791	0	3.27889	0	2.76866	2.23382	2.27886	0	2.01354	0	3.50757	3.65835	0	0	0	0	0	0	0	0	0	0	0	0	0	0	0	0	0	0	0	0	0	0	0	0	0
PB.55307.45	Prkcz	Prkcz-S-45	ISM	1.86468	2.04954	0	0	0	0	0	0	0	0	0	0	0	2.13636	0	1.6832	0	2.01354	1.92483	0	0	0	2.97402	0	0	0	0	0	0	4.4043	4.76001	5.0804	3.77792	0	4.48314	3.47019	4.46507	0	4.1797	2.95272	0	4.12752	4.78067	4.97199	5.28679	0
PB.77546.23	Cep70	Cep70-S-23	FSM	1.86468	2.67612	0	0	0	0	0	0	0	0	0	0	0	2.13636	1.64244	1.6832	0	0	0	0	0	0	0	0	0	2.71216	0	0	0	0	3.01019	0	0	0	3.13018	0	0	2.96822	3.11123	0	0	0	0	0	0	0
PB.60670.94	Hmgb1	Hmgb1-S-94	FSM	3.66809	3.72776	4.48734	3.18091	2.94119	3.77922	2.72941	0	2.19357	0	4.16958	4.13214	4.62251	4.4207	3.25834	4.95052	1.57395	3.83791	1.92483	0	0	0	0	0	0	0	2.80904	0	0	0	0	0	0	0	0	0	0	0	0	0	0	0	0	0	0	0
PB.64673.10	Ldhb	Ldhb-S-10	ISM	4.34839	3.87847	3.41098	4.61477	4.40333	4.59297	3.38938	3.06435	2.82934	4.023	4.63377	3.73467	4.31593	4.4207	3.93208	4.38065	3.99929	4.08443	3.41016	4.40572	3.65835	5.89468	5.00772	4.80028	2.74483	4.04737	4.95121	5.21734	3.94143	0	0	0	3.10739	0	0	0	0	2.96822	0	0	0	0	0	0	0	0
PB.24515.74	Fndc3a	Fndc3a-S-74	ISM	1.86468	3.05837	3.13424	0	2.2995	0	0	0	0	0	1.99726	3.45491	3.87154	2.13636	3.53637	4.20083	0	0	1.92483	0	0	0	0	0	0	0	0	0	0	0	0	0	0	0	0	0	0	0	0	0	0	0	0	0	0	0
PB.54132.229	Syf2	Syf2-S-229	NIC	0	0	0	0	0	0	0	0	0	0	0	0	0	0	0	0	0	0	0	0	0	3.43962	0	0	0	0	0	0	0	0	0	0	0	0	0	0	0	0	0	0	0	0	3.6987	0	0	0
PB.56459.58	Haus3	Haus3-S-58	ISM	1.86468	3.05837	0	0	0	0	0	0	2.19357	0	1.99726	0	0	3.42993	2.60293	2.91945	2.15772	0	0	0	0	0	0	0	0	0	0	0	0	0	0	0	0	0	0	0	0	0	0	0	0	0	0	0	0	0
PB.17983.16	Rps6ka5	Rps6ka5-S-16	NNC	1.86468	0	0	0	0	0	0	0	0	0	0	0	0	0	0	2.27886	2.15772	0	1.92483	0	0	0	0	0	0	0	0	0	0	0	0	0	0	0	0	0	0	0	0	0	0	0	0	0	0	0
PB.67207.2	Nav2	Nav2-S-2	NNC	0	2.67612	0	0	0	0	0	0	0	0	1.99726	0	2.66954	0	1.64244	2.27886	0	0	0	0	0	0	0	0	0	0	0	0	0	0	0	0	0	0	0	0	0	0	0	0	0	0	0	0	0	0
PB.64673.23	Ldhb	Ldhb-S-23	ISM	2.47719	0	2.11911	0	2.2995	1.96174	2.09948	0	2.19357	0	1.99726	2.41757	0	2.13636	1.64244	0	0	0	1.92483	0	0	0	0	3.04884	0	0	0	2.87225	0	0	0	0	0	0	0	0	0	0	0	0	0	0	0	0	0	0
PB.35918.33	Matr3	Matr3-S-33	FSM	0	2.04954	0	0	0	0	0	0	0	2.1791	1.99726	0	2.04338	2.13636	0	1.6832	0	0	1.92483	0	0	0	0	0	0	0	0	0	0	0	0	0	0	0	0	0	0	0	0	0	0	0	0	0	0	0
PB.37988.246	Stip1	Stip1-S-246	ISM	1.86468	0	0	0	0	0	0	0	0	0	3.00104	0	2.04338	2.76866	1.64244	2.6496	0	0	0	0	0	0	0	0	0	0	0	0	0	0	0	0	0	0	0	0	0	0	0	0	0	0	0	0	0	0
PB.58970.57	Tbx3os1	Tbx3os1-S-57	NIC	0	0	0	0	0	0	0	0	0	2.1791	1.99726	1.80981	0	0	0	1.6832	0	0	0	0	0	0	0	0	0	2.71216	3.4716	0	0	0	0	0	0	0	0	0	0	0	0	0	0	0	0	0	0	0
PB.64843.250	Ergic2	Ergic2-S-250	ISM	0	0	0	0	0	0	0	0	0	0	1.99726	1.80981	0	0	1.64244	0	1.57395	0	0	0	0	0	0	0	0	0	0	0	0	0	0	0	0	0	0	0	3.11271	0	0	0	0	0	0	0	0	0
PB.8743.10	Osbpl8	Osbpl8-S-10	NIC	0	0	0	0	0	0	0	2.68196	0	0	0	0	0	0	0	1.6832	1.57395	0	0	0	3.65835	0	0	0	0	0	0	0	0	0	0	0	0	0	0	0	0	0	0	0	0	0	0	0	0	0
PB.73739.310	Mphosph6	Mphosph6-S-310	FSM	4.27528	3.87847	4.77221	3.18091	4.60177	3.45185	2.09948	2.055	2.82934	0	3.49177	3.27889	4.62251	4.2227	2.87192	4.38065	2.15772	2.01354	1.92483	2.84395	0	3.43962	2.97402	0	3.40532	0	2.80904	0	0	0	0	0	3.10739	0	0	0	0	0	0	0	0	0	0	0	4.19825	0
PB.66817.22	Zfp977	Zfp977-S-22	FSM	0	0	0	0	0	0	0	0	0	0	0	0	0	0	0	0	0	0	0	0	0	0	0	0	0	0	0	0	0	0	0	0	3.10739	0	0	0	0	0	0	0	0	0	0	0	0	0
PB.71409.11	Cfap97	Cfap97-S-11	FSM	0	0	0	0	0	0	0	0	0	0	0	1.80981	2.04338	0	1.64244	1.6832	0	0	0	0	0	0	0	0	2.74483	0	0	0	0	0	0	0	0	0	0	0	0	0	0	0	0	0	0	0	0	0
PB.28982.273	Rsl1d1	Rsl1d1-S-273	ISM	1.86468	3.05837	0	0	3.60758	1.96174	2.72941	2.68196	0	0	1.99726	3.45491	4.22195	2.76866	3.53637	4.06003	2.15772	2.63759	2.92112	2.84395	0	0	0	0	2.74483	0	0	0	0	0	0	0	0	0	0	0	0	0	0	0	0	0	0	0	0	0
PB.24928.4	Pibf1	Pibf1-S-4	ISM	2.47719	2.04954	0	0	0	1.96174	0	0	0	0	1.99726	0	3.05164	2.76866	1.64244	2.27886	0	0	0	0	0	0	0	0	0	0	0	0	0	0	0	0	0	0	0	0	0	0	0	0	0	0	0	0	0	0
PB.49933.553	Nexn	Nexn-S-553	NIC	2.47719	2.04954	2.11911	0	0	0	0	0	0	2.1791	0	0	2.66954	0	2.23382	2.91945	0	0	0	0	0	0	0	0	0	0	0	0	0	0	0	0	0	0	0	0	0	0	0	0	0	0	0	0	0	0
PB.78586.6	1700048O20Rik	1700048O20Rik-S-6	FSM	3.12744	3.55023	3.80538	4.25144	3.82529	3.62887	4.28522	3.34029	2.19357	4.023	3.49177	3.60454	2.66954	3.42993	2.23382	3.89611	2.52389	4.1881	2.92112	0	2.99065	4.1166	4.03797	0	4.08173	2.71216	2.80904	3.5367	3.94143	0	3.01019	0	0	0	0	0	0	0	0	0	0	0	0	0	0	0
PB.14302.101	Ccdc47	Ccdc47-S-101	ISM	1.86468	0	0	0	0	1.96174	2.09948	0	0	0	1.99726	1.80981	0	0	0	0	1.57395	0	0	0	0	0	0	0	0	0	2.80904	0	3.94143	0	0	0	0	0	0	0	0	0	0	0	0	0	0	0	0	0
PB.5090.36	Eprs	Eprs-S-36	ISM	0	2.04954	2.11911	0	0	0	0	2.055	0	0	0	0	2.04338	2.13636	1.64244	0	0	0	0	0	0	0	0	0	0	0	0	0	0	0	0	0	0	0	0	0	0	0	0	0	0	0	0	0	0	0
PB.315.24	Terf1	Terf1-S-24	ISM	1.86468	2.04954	2.75031	0	0	0	0	0	0	0	1.99726	2.41757	3.72086	2.76866	2.60293	1.6832	0	0	0	0	0	0	0	0	0	0	0	0	0	0	0	0	0	0	0	0	0	0	0	0	0	0	0	0	0	0
PB.53730.82	Zcchc17	Zcchc17-S-82	NIC	0	0	2.75031	0	0	0	0	0	0	0	0	1.80981	2.66954	2.13636	2.23382	2.6496	0	0	0	0	0	0	0	0	0	0	0	0	0	0	0	0	0	0	0	0	0	0	0	0	0	0	0	0	0	0
PB.45031.50	Srsf6	Srsf6-S-50	ISM	0	2.04954	0	0	0	0	0	0	0	0	0	0	0	0	0	1.6832	1.57395	0	0	0	0	0	3.64129	0	0	0	0	0	0	0	0	0	0	3.24901	0	3.47019	3.78336	0	0	2.95272	0	0	0	0	0	0
PB.67310.60	Nipa2	Nipa2-S-60	FSM	0	0	0	0	0	0	0	0	0	0	0	0	0	0	0	0	0	0	0	0	0	0	0	0	0	0	2.80904	0	0	0	0	3.31925	3.10739	0	0	0	0	2.96822	0	0	0	0	0	0	0	0
PB.54713.430	Pramel4	Pramel4-S-430	FSM	0	0	0	0	2.2995	0	0	0	0	0	0	1.80981	0	0	0	0	0	0	0	0	0	0	0	0	0	0	0	0	0	0	0	0	0	0	0	0	0	0	3.11123	2.95272	0	0	0	0	0	0
PB.35826.42	Pkd2l2	Pkd2l2-S-42	NNC	0	0	0	2.16213	0	0	0	0	0	0	0	1.80981	0	2.13636	2.60293	2.6496	0	0	1.92483	0	0	0	0	0	2.74483	0	0	0	0	0	0	0	0	0	0	0	0	0	0	0	0	0	0	0	0	0
PB.35278.63	Esco1	Esco1-S-63	ISM	0	2.04954	0	0	2.2995	0	0	0	0	0	0	1.80981	2.04338	2.13636	0	0	0	2.01354	0	2.84395	0	0	0	0	0	0	0	0	0	0	0	0	0	0	0	0	0	0	0	0	0	0	0	0	0	0
PB.48101.4	Tpm3	Tpm3-S-4	ISM	0	0	2.75031	0	0	1.96174	0	2.055	0	0	2.62014	0	0	2.13636	1.64244	1.6832	0	0	0	0	0	0	0	0	0	0	0	0	0	0	0	0	0	0	0	0	0	0	0	0	0	0	0	0	0	0
PB.14177.120	Nsf	Nsf-S-120	ISM	0	2.04954	2.11911	0	2.2995	1.96174	0	0	0	0	2.62014	1.80981	2.04338	0	2.60293	2.27886	0	2.01354	0	0	0	0	0	0	0	0	0	0	0	0	0	0	0	0	0	0	0	0	0	0	0	0	0	0	0	0
PB.70423.115	Tmco3	Tmco3-S-115	ISM	2.47719	3.33425	2.11911	3.18091	2.2995	2.58199	3.38938	3.34029	2.19357	3.69366	2.62014	2.79287	3.54337	3.15298	1.64244	0	3.00213	3.01892	2.54223	2.84395	0	3.43962	0	3.71799	0	0	0	2.87225	3.94143	0	0	0	0	0	0	0	0	0	0	0	0	0	0	0	0	0
PB.22182.1	Dhx29	Dhx29-S-1	ISM	0	2.04954	2.11911	2.16213	0	0	0	0	0	0	2.62014	0	0	0	0	1.6832	0	0	0	0	2.99065	0	0	0	0	0	0	0	0	0	0	0	0	0	0	0	0	0	0	0	0	0	0	0	0	0
PB.2368.105	Psmd1	Psmd1-S-105	ISM	0	0	2.11911	0	0	0	0	0	0	0	1.99726	1.80981	0	2.13636	0	1.6832	0	0	0	0	0	0	0	0	0	0	0	0	0	0	0	0	0	0	0	0	0	0	0	0	0	0	0	0	0	0
PB.4146.3	Tor1aip2	Tor1aip2-S-3	NIC	0	2.04954	0	0	0	0	2.09948	0	0	0	0	0	0	0	0	0	0	0	0	0	0	0	0	0	0	0	0	0	0	0	0	0	0	0	0	0	0	0	0	0	0	0	0	0	0	0
PB.38540.38	Klf9	Klf9-S-38	FSM	0	0	0	0	0	0	0	0	0	0	0	0	0	0	0	0	0	0	0	0	0	0	0	0	0	0	0	0	0	0	0	0	3.10739	0	0	0	3.11271	0	0	2.95272	0	0	0	0	0	0
PB.21938.41	Srek1	Srek1-S-41	ISM	1.86468	0	0	0	2.2995	0	0	0	2.19357	0	1.99726	0	0	2.13636	0	2.6496	0	2.01354	2.54223	0	0	0	0	0	0	0	0	0	0	0	0	0	0	0	0	0	0	0	0	0	0	0	0	0	0	0
PB.22715.60	Ecd	Ecd-S-60	ISM	0	0	0	0	0	2.58199	0	0	0	0	0	0	0	2.13636	0	0	0	0	0	0	0	0	0	0	0	0	0	0	0	0	0	0	0	0	0	0	0	0	0	0	0	0	0	0	0	0
PB.28982.286	Rsl1d1	Rsl1d1-S-286	ISM	3.12744	2.67612	2.11911	2.16213	2.2995	0	0	0	0	0	2.62014	1.80981	2.04338	3.64657	3.25834	2.91945	0	2.63759	2.54223	0	0	0	2.97402	0	3.40532	0	0	0	0	0	0	0	0	0	0	0	0	0	0	0	0	0	0	0	0	0
PB.75191.1	Gm27164	Gm27164-S-1	NIC	3.34178	3.72776	3.80538	3.67498	4.15551	3.62887	3.11288	3.73388	3.21493	2.1791	3.81951	2.79287	3.54337	3.42993	2.87192	2.6496	3.32431	3.68734	2.92112	4.18562	0	0	4.32124	3.71799	4.98784	4.26702	3.86665	2.87225	0	0	0	0	0	0	0	0	0	0	0	0	0	0	0	0	0	0
PB.11956.273	Eif4a1	Eif4a1-S-273	FSM	2.47719	2.67612	0	0	2.94119	0	0	0	0	0	3.49177	1.80981	2.04338	0	2.87192	2.6496	0	0	0	0	0	0	0	0	0	0	0	0	0	0	0	0	0	0	0	0	0	0	0	0	0	0	0	0	0	0
PB.45792.33	Gm14401	Gm14401-S-33	FSM	0	0	0	0	0	0	0	0	0	0	0	0	0	0	0	0	1.57395	0	0	0	0	0	0	0	0	0	0	0	0	0	0	0	0	0	0	0	0	0	0	2.95272	0	0	0	0	0	0
PB.3376.86	Slc45a3	Slc45a3-S-86	ISM	0	0	0	0	0	0	0	0	0	0	0	0	0	0	0	2.27886	0	0	0	0	3.65835	0	3.64129	3.71799	0	2.71216	3.86665	0	0	0	0	0	0	0	0	0	0	0	0	0	0	0	0	0	0	0
PB.23078.8	Sfmbt1	Sfmbt1-S-8	ISM	0	2.04954	0	0	0	2.58199	2.09948	0	2.19357	0	3.00104	1.80981	2.66954	2.76866	2.23382	3.13174	1.57395	0	2.54223	0	0	0	0	0	0	0	0	0	0	0	0	0	0	0	0	0	0	0	0	0	0	0	0	0	0	0
PB.16566.2	Psma6	Psma6-S-2	ISM	0	0	2.75031	0	0	0	0	0	0	0	1.99726	0	2.66954	2.13636	1.64244	2.27886	0	0	1.92483	0	0	0	0	0	0	0	0	0	0	0	0	0	0	0	0	0	0	0	0	0	0	0	3.6987	0	0	0
PB.48367.62	Mcl1	Mcl1-S-62	ISM	0	0	0	0	0	0	0	0	0	0	0	0	0	0	0	0	0	0	0	0	0	0	0	0	0	0	0	0	0	0	0	3.31925	0	0	0	0	0	2.96822	0	2.95272	0	0	0	0	0	0
PB.54108.5	Aunip	Aunip-S-5	FSM	0	0	2.11911	0	0	0	0	0	0	0	2.62014	0	2.04338	0	0	2.27886	0	0	0	0	0	0	0	0	0	0	0	0	0	0	0	0	0	0	0	0	0	0	0	0	0	0	0	0	0	0
PB.61768.13	Wee2	Wee2-S-13	ISM	0	0	2.11911	0	2.2995	0	0	0	0	0	0	0	2.04338	2.13636	2.87192	2.6496	0	0	0	0	0	0	0	0	0	0	0	0	0	0	0	0	0	0	0	0	0	0	0	0	0	0	0	0	0	0
PB.60453.29	Zfp655	Zfp655-S-29	FSM	1.86468	2.04954	0	0	0	0	0	0	0	0	1.99726	1.80981	2.04338	0	0	3.30676	0	0	0	0	0	0	0	0	0	0	0	0	0	0	0	0	0	0	0	0	0	0	0	0	0	0	0	0	0	0
PB.32852.36	U2af1	U2af1-S-36	NNC	1.86468	0	0	0	2.2995	0	0	0	0	0	0	0	0	0	0	2.27886	0	0	0	2.84395	0	0	0	0	0	0	0	0	0	0	0	0	0	0	0	0	0	0	0	0	0	0	0	0	0	0
PB.5183.148	Cenpf	Cenpf-S-148	ISM	0	3.55023	3.13424	2.79601	3.3289	1.96174	0	0	0	0	3.66901	2.41757	3.05164	2.76866	1.64244	3.98142	1.57395	4.1881	1.92483	0	0	0	0	0	0	0	0	0	0	0	0	0	0	0	0	0	0	0	0	0	0	0	0	0	0	0
PB.23098.130	Gnl3	Gnl3-S-130	ISM	1.86468	2.67612	2.75031	0	0	0	0	0	0	0	3.00104	3.27889	3.72086	3.42993	3.25834	3.69994	0	3.29432	1.92483	0	0	0	0	0	0	0	0	0	0	0	0	0	0	0	0	0	0	0	0	0	0	0	0	0	0	0
PB.24476.55	Npm2	Npm2-S-55	NIC	0	0	3.13424	2.16213	3.3289	1.96174	0	0	0	0	0	1.80981	2.04338	2.13636	0	2.27886	0	2.01354	0	0	0	0	0	0	0	0	0	0	0	0	0	0	0	0	0	0	0	0	0	0	0	0	0	0	0	0
PB.52920.179	Nasp	Nasp-S-179	ISM	0	2.04954	0	0	0	0	0	0	0	0	3.00104	1.80981	2.04338	0	0	2.6496	0	0	0	0	0	0	0	0	0	0	0	0	0	0	0	0	0	0	0	0	0	0	0	0	0	0	0	0	0	0
PB.71284.236	Mtus1	Mtus1-S-236	NNC	0	3.72776	2.75031	2.79601	3.3289	3.23659	0	0	2.19357	0	3.27621	3.06512	3.05164	3.82454	3.25834	4.38065	1.57395	2.63759	2.54223	2.84395	0	0	0	0	2.74483	0	0	0	0	0	0	0	0	0	0	0	0	0	0	0	0	0	0	0	0	0
PB.4726.4	Fmn2	Fmn2-S-4	NNC	0	0	0	0	0	0	0	0	0	0	0	0	0	0	2.60293	1.6832	1.57395	0	1.92483	0	4.05518	0	0	0	0	0	0	2.87225	0	0	0	0	0	0	0	0	0	0	0	0	0	0	0	0	0	0
PB.69219.72	Nsmce1	Nsmce1-S-72	ISM	0	0	0	0	0	0	0	0	0	0	3.00104	1.80981	2.04338	2.13636	0	1.6832	0	0	0	0	0	0	0	0	0	0	0	0	0	0	0	0	0	0	0	0	0	0	0	0	0	0	0	0	0	0
PB.15494.5	Fam49a	Fam49a-S-5	NNC	0	2.67612	0	0	0	1.96174	0	0	0	0	1.99726	1.80981	0	0	0	1.6832	0	0	2.54223	0	0	0	0	0	0	0	0	0	0	0	0	0	0	0	0	0	0	0	0	0	0	0	0	0	0	0
PB.17746.37	Snw1	Snw1-S-37	ISM	0	2.04954	2.11911	2.16213	0	0	0	0	0	0	0	0	3.05164	0	1.64244	0	0	0	0	2.84395	0	0	0	0	0	0	0	0	0	0	0	0	0	0	0	0	0	0	0	0	0	0	0	0	0	0
PB.18355.213	Hsp90aa1	Hsp90aa1-S-213	ISM	4.41653	4.81021	4.40135	3.67498	3.60758	4.22287	3.78354	2.055	3.49252	2.1791	4.63377	4.47572	5.04653	4.72764	5.40218	6.08513	2.52389	4.87363	3.73715	0	0	0	0	0	2.74483	0	0	0	0	0	0	0	0	0	0	0	0	0	0	0	0	0	0	0	0	0
PB.77027.154	Eef1a1	Eef1a1-S-154	ISM	0	2.04954	0	0	0	0	0	0	0	0	0	1.80981	0	0	1.64244	0	0	0	0	2.84395	2.99065	0	0	0	0	0	0	0	0	0	0	0	0	0	0	0	0	0	0	0	0	0	0	0	0	0
PB.76816.8	Ccpg1	Ccpg1-S-8	FSM	0	0	0	0	0	0	0	0	0	0	0	0	0	0	0	0	0	0	0	0	0	0	0	0	0	0	0	0	0	0	3.01019	0	3.10739	0	0	4.54785	3.11271	0	3.11123	2.95272	0	0	0	0	0	0
PB.71284.123	Mtus1	Mtus1-S-123	ISM	0	0	0	0	0	2.58199	0	0	0	0	2.62014	0	0	0	0	1.6832	0	0	0	0	0	0	0	0	0	3.37154	0	0	0	0	0	0	0	0	0	0	0	0	0	2.95272	0	0	0	0	0	0
PB.32139.3	Srrm2	Srrm2-S-3	ISM	0	2.04954	3.41098	0	2.2995	0	0	0	0	0	3.00104	2.79287	3.32743	2.76866	2.23382	2.91945	1.57395	3.51002	3.41016	0	2.99065	0	0	0	0	0	0	0	0	0	0	0	0	0	0	0	0	0	0	0	0	0	0	0	0	0
PB.45810.7	Gm14418	Gm14418-S-7	NIC	0	0	0	0	0	1.96174	0	0	0	0	0	0	0	0	0	1.6832	0	0	0	0	0	0	0	0	0	0	0	0	0	0	0	0	0	3.24901	0	3.47019	0	0	0	0	0	0	0	0	0	0
PB.44781.60	Phf20	Phf20-S-60	NIC	0	2.04954	0	0	2.2995	1.96174	0	0	0	0	1.99726	1.80981	0	0	0	2.6496	0	0	0	0	0	0	0	0	0	0	0	0	0	0	0	0	0	0	0	0	0	0	0	0	0	0	0	0	0	0
PB.41353.114	Rab14	Rab14-S-114	ISM	0	0	0	0	2.2995	0	0	0	0	0	0	0	0	2.13636	0	0	0	0	1.92483	0	0	0	0	0	0	0	0	0	0	0	0	0	0	0	0	0	0	0	0	0	0	0	0	0	0	0
PB.40112.29	Cdc123	Cdc123-S-29	ISM	1.86468	2.04954	0	2.16213	0	0	0	0	0	0	0	0	0	2.13636	0	1.6832	0	2.01354	0	0	0	0	0	0	0	0	0	0	0	0	0	0	0	0	0	0	0	0	0	0	0	0	0	0	0	0
PB.63068.181	D6Ertd527e	D6Ertd527e-S-181	FSM	0	0	0	0	0	1.96174	0	2.055	0	0	0	1.80981	2.66954	3.82454	1.64244	2.27886	0	0	0	0	0	0	0	3.04884	0	0	0	0	0	0	0	0	0	0	0	0	0	0	0	0	0	0	0	0	0	0
PB.20139.77	Ninj1	Ninj1-S-77	NIC	1.86468	0	2.11911	2.16213	2.2995	2.58199	0	2.68196	2.19357	2.1791	0	2.41757	0	2.76866	2.60293	2.6496	2.15772	3.68734	3.19524	0	0	0	0	0	0	0	0	3.5367	0	4.4043	0	0	0	0	0	0	0	0	0	0	0	0	0	0	0	0
PB.28345.18	Tmbim6	Tmbim6-S-18	ISM	0	3.05837	0	2.16213	2.94119	1.96174	0	0	0	0	0	2.41757	3.05164	2.76866	2.23382	2.91945	0	0	0	0	0	0	0	0	2.74483	0	0	0	0	0	0	0	0	0	0	0	0	0	0	0	0	0	0	0	0	0
PB.66629.51	Tdrd12	Tdrd12-S-51	ISM	0	0	2.11911	0	0	0	0	0	0	0	0	2.79287	3.05164	2.76866	1.64244	2.27886	0	0	0	0	0	0	0	0	0	0	0	0	0	0	0	0	0	0	0	0	0	0	0	0	0	0	0	0	0	0
PB.19864.6	Smim13	Smim13-S-6	FSM	0	0	0	0	0	0	0	0	0	0	0	0	0	0	0	0	0	0	0	0	0	0	0	0	0	0	0	0	0	0	0	0	0	0	3.80123	0	0	0	3.11123	0	0	4.12752	0	0	0	0
PB.14163.45	Gosr2	Gosr2-S-45	ISM	0	0	0	0	0	0	0	0	0	0	0	0	0	0	0	0	0	0	0	0	0	0	0	0	0	0	0	0	0	0	0	0	0	0	0	0	0	0	0	0	0	0	0	0	0	0
PB.13219.33	Elobl	Elobl-S-33	FSM	0	0	0	0	0	3.23659	0	0	0	0	3.49177	3.84979	4.40183	3.15298	4.38436	3.69994	0	2.01354	1.92483	4.18562	2.99065	4.1166	0	3.04884	2.74483	3.37154	3.86665	2.87225	3.94143	0	0	0	0	0	0	0	0	0	0	0	0	0	0	0	0	0
PB.3376.11	Slc45a3	Slc45a3-S-11	ISM	0	0	0	0	0	0	0	0	0	0	0	0	0	0	0	2.27886	0	0	0	2.84395	0	3.43962	0	0	0	2.71216	0	0	3.94143	0	0	0	0	0	0	0	0	0	0	0	0	0	0	0	0	0
PB.55887.80	Srpk2	Srpk2-S-80	NNC	0	2.04954	2.11911	0	0	0	0	0	0	0	0	1.80981	2.04338	0	0	0	0	0	1.92483	0	0	0	0	0	0	0	0	0	0	0	0	0	0	0	0	0	0	0	0	0	0	0	0	0	0	0
PB.44243.13	Mgme1	Mgme1-S-13	ISM	0	0	0	0	0	0	0	0	0	0	0	0	0	0	1.64244	0	0	0	0	0	0	0	0	0	0	0	0	0	0	0	0	0	0	0	0	0	0	0	0	0	0	0	0	0	0	0
PB.2604.35	Ube2f	Ube2f-S-35	ISM	0	0	0	0	0	0	0	0	0	0	0	0	0	0	0	0	0	0	0	0	0	0	0	0	0	0	0	0	0	0	0	0	3.77792	3.24901	0	0	0	0	0	0	0	0	0	0	0	0
PB.26100.9	Mtdh	Mtdh-S-9	ISM	0	0	2.11911	0	2.2995	0	0	0	0	0	0	0	0	2.76866	2.23382	2.27886	0	0	2.54223	0	0	0	0	0	0	0	0	0	0	0	0	0	0	0	0	0	0	0	0	0	0	0	0	0	0	0
PB.78794.124	Bmp15	Bmp15-S-124	FSM	0	0	0	0	0	0	0	0	0	0	1.99726	2.41757	2.04338	2.76866	2.87192	3.30676	0	0	1.92483	3.50757	3.65835	0	2.97402	0	0	2.71216	0	0	0	0	0	0	0	0	0	0	0	0	0	0	0	0	0	0	0	0
PB.31503.11	4930579D07Rik	4930579D07Rik-S-11	NNC	0	2.04954	0	2.79601	0	0	0	0	0	2.1791	2.62014	2.79287	2.04338	2.13636	1.64244	0	0	0	1.92483	2.84395	0	0	0	0	0	0	0	0	0	0	0	0	0	0	0	0	0	0	0	0	0	0	0	0	0	0
PB.16842.64	Nemf	Nemf-S-64	ISM	0	0	2.11911	0	0	2.58199	0	0	0	0	0	1.80981	2.04338	0	1.64244	0	0	0	0	0	0	0	0	0	0	0	0	0	0	0	0	0	0	0	0	0	0	0	0	0	0	0	0	0	0	0
PB.32671.9	Ppil1	Ppil1-S-9	ISM	0	0	0	0	0	0	0	0	0	0	0	0	0	0	0	0	0	0	0	0	0	0	0	0	0	0	0	0	0	0	0	0	0	0	0	0	0	0	0	2.95272	0	0	0	0	0	0
PB.48106.304	Ubap2l	Ubap2l-S-304	ISM	0	2.04954	0	2.16213	2.2995	0	2.09948	0	2.19357	0	1.99726	0	2.04338	0	1.64244	1.6832	0	0	0	0	0	0	0	0	0	0	0	0	0	0	0	0	0	0	0	0	0	0	0	0	0	0	0	0	0	0
PB.63564.16	Trnt1	Trnt1-S-16	ISM	1.86468	0	0	0	2.2995	1.96174	0	0	0	0	1.99726	0	2.04338	2.13636	2.23382	2.27886	0	0	0	0	0	0	0	0	0	0	0	0	0	0	0	0	0	0	0	0	0	0	0	0	0	0	0	0	0	0
PB.24699.25	Epsti1	Epsti1-S-25	ISM	1.86468	0	2.75031	0	2.94119	0	0	0	0	0	1.99726	0	0	2.13636	0	1.6832	0	2.01354	1.92483	0	0	0	0	0	0	0	0	0	0	0	0	0	0	0	0	0	0	0	0	0	0	0	0	0	0	0
PB.63871.64	Bms1	Bms1-S-64	ISM	0	0	2.11911	0	0	0	0	0	0	0	1.99726	1.80981	2.04338	0	1.64244	2.27886	0	0	0	0	0	0	0	0	0	0	0	0	0	0	0	0	0	0	0	0	0	0	0	0	0	0	0	0	0	0
PB.56442.129	Nelfa	Nelfa-S-129	FSM	0	0	0	0	0	0	0	0	0	0	0	0	0	0	0	0	0	2.01354	0	0	0	0	0	0	0	0	0	0	0	4.4043	3.67839	0	3.10739	0	0	0	3.78336	0	0	0	0	0	0	0	0	0
PB.19864.4	Smim13	Smim13-S-4	FSM	0	0	0	2.16213	0	0	0	0	0	0	0	0	0	0	0	0	0	0	0	0	0	0	0	0	0	0	0	0	0	0	0	3.31925	0	0	0	0	0	0	0	0	0	0	0	0	0	0
PB.54132.71	Rsrp1	Rsrp1-S-71	FSM	1.86468	2.04954	2.11911	0	0	1.96174	0	0	0	0	0	0	0	2.13636	0	1.6832	0	0	0	0	0	0	0	0	0	0	0	0	0	0	0	0	0	0	0	0	0	0	0	0	0	0	0	0	0	0
PB.53323.3	Mycbp	Mycbp-S-3	FSM	0	2.04954	2.75031	0	0	0	2.72941	0	0	0	1.99726	1.80981	2.04338	3.42993	1.64244	0	0	0	0	0	0	0	0	0	0	0	0	0	0	0	0	0	0	0	0	0	0	0	0	2.95272	0	0	0	3.88715	0	0
PB.55798.29	Rsbn1l	Rsbn1l-S-29	ISM	0	2.04954	0	2.16213	2.94119	1.96174	2.09948	0	0	0	1.99726	0	0	0	0	2.6496	0	0	0	2.84395	0	0	0	0	0	0	0	0	0	0	0	0	0	0	0	0	0	0	0	0	0	0	0	0	0	0
PB.1569.15	Nop58	Nop58-S-15	ISM	0	2.04954	0	0	2.2995	1.96174	0	0	2.82934	0	0	1.80981	2.66954	2.13636	2.23382	0	0	2.01354	1.92483	0	0	0	0	0	0	2.71216	0	2.87225	0	0	0	0	0	0	0	0	0	0	0	0	0	0	0	0	0	0
PB.59757.36	Rfc2	Rfc2-S-36	ISM	0	0	0	0	0	0	0	0	0	0	0	0	0	0	0	0	0	2.01354	0	0	0	0	0	0	2.74483	0	0	0	0	0	0	0	0	0	0	0	0	0	0	0	0	0	0	0	0	0
PB.46265.4	Ralyl	Ralyl-S-4	NNC	0	2.67612	0	0	2.2995	1.96174	0	0	0	0	0	1.80981	0	2.13636	2.87192	2.27886	1.57395	0	1.92483	2.84395	3.65835	3.43962	3.64129	3.71799	2.74483	2.71216	3.4716	2.87225	0	0	0	0	0	0	0	0	0	0	0	0	0	0	0	0	0	0
PB.22851.14	Rps24	Rps24-S-14	FSM	1.86468	0	2.11911	2.16213	0	0	0	0	0	0	2.62014	2.41757	2.66954	0	2.23382	2.27886	0	0	0	0	0	0	0	0	0	0	0	2.87225	0	0	0	0	0	0	0	0	0	0	0	0	0	0	0	0	0	0
PB.1925.5	Xrcc5	Xrcc5-S-5	ISM	0	2.67612	0	0	2.2995	2.58199	0	0	2.19357	0	1.99726	1.80981	2.04338	0	2.23382	1.6832	0	0	0	0	0	0	0	0	0	0	0	0	0	0	0	0	0	0	0	0	0	0	0	0	0	0	0	0	0	0
PB.27458.68	Sgsm3	Sgsm3-S-68	NIC	0	0	0	0	0	0	0	0	0	0	0	0	2.04338	0	0	0	0	0	0	0	0	0	0	0	0	0	0	0	3.94143	0	0	3.31925	0	0	0	3.47019	0	0	0	0	0	0	0	0	0	0
PB.3075.12	Nifk	Nifk-S-12	ISM	0	0	0	0	0	0	0	2.055	0	0	0	0	2.04338	2.13636	1.64244	1.6832	0	0	0	0	0	0	0	0	0	0	0	0	0	0	0	0	0	0	0	0	0	0	0	0	0	0	0	0	0	0
PB.58317.56	Glmn	Glmn-S-56	ISM	0	0	0	2.16213	0	1.96174	0	0	0	0	0	2.41757	2.04338	0	3.08368	2.27886	0	0	0	0	0	0	0	0	0	0	0	0	0	0	0	0	0	0	0	0	0	0	0	0	0	0	0	0	0	0
PB.52008.168	Psip1	Psip1-S-168	ISM	1.86468	0	0	0	0	0	0	0	0	0	1.99726	1.80981	3.05164	2.13636	0	0	0	0	1.92483	0	0	0	0	0	0	0	0	0	0	0	0	0	0	0	0	0	0	0	0	0	0	0	0	0	0	0
PB.8135.70	Hsp90b1	Hsp90b1-S-70	ISM	0	0	0	0	0	0	0	2.055	0	0	0	1.80981	0	0	1.64244	2.27886	0	0	0	0	0	0	0	0	0	0	0	0	0	0	0	0	0	0	0	0	0	0	0	0	0	0	0	0	0	0
PB.51615.51	Gm12594	Gm12594-S-51	NNC	0	0	0	0	0	0	0	0	0	0	0	0	0	0	0	0	0	0	0	0	0	0	0	0	2.74483	0	0	0	0	0	0	0	0	0	0	0	0	0	0	0	0	0	0	0	0	0
PB.66786.1	Zfp788	Zfp788-S-1	FSM	0	0	0	0	0	0	0	0	0	0	0	1.80981	0	0	0	0	0	0	0	0	0	0	0	0	0	0	0	0	0	0	0	0	0	0	3.80123	0	3.78336	2.96822	0	0	3.88458	0	0	0	0	0
PB.18426.14	Cdc42bpb	Cdc42bpb-S-14	ISM	2.47719	0	0	2.16213	3.3289	1.96174	2.09948	0	2.19357	2.1791	0	1.80981	2.66954	2.13636	1.64244	0	2.52389	2.63759	0	0	2.99065	3.43962	0	0	2.74483	0	2.80904	3.5367	3.94143	0	0	0	0	3.24901	3.13018	0	3.78336	0	0	2.95272	0	0	0	0	0	0
PB.17780.312	Gm10436	Gm10436-S-312	FSM	1.86468	0	0	0	0	0	0	0	0	0	0	2.79287	2.04338	0	3.25834	1.6832	0	2.01354	0	3.50757	3.65835	3.43962	0	0	2.74483	3.37154	3.4716	2.87225	0	0	0	0	0	0	0	0	0	0	0	0	0	0	0	0	0	0
PB.68759.2	Swap70	Swap70-S-2	FSM	0	0	0	0	0	0	0	0	2.19357	0	0	0	0	0	0	0	0	0	0	0	0	0	0	0	2.74483	0	0	0	0	0	0	0	0	0	0	0	0	0	0	0	0	0	0	0	0	0
PB.60453.46	Zfp655	Zfp655-S-46	FSM	0	0	0	0	0	0	0	0	0	0	0	0	0	0	2.23382	2.27886	0	0	0	0	0	3.43962	0	0	0	2.71216	2.80904	0	0	0	0	0	0	0	0	0	0	0	0	0	0	0	0	0	0	0
PB.57203.70	Slc30a9	Slc30a9-S-70	FSM	3.66809	3.33425	3.13424	3.85307	3.82529	1.96174	3.93443	4.32909	3.21493	4.15429	3.66901	3.06512	0	3.15298	0	0	3.56759	2.63759	2.92112	2.84395	2.99065	0	0	0	2.74483	0	2.80904	0	0	0	0	0	0	0	0	0	0	0	3.11123	0	0	0	0	0	0	0
PB.33754.22	Gm17830	Gm17830-S-22	NNC	0	2.67612	2.11911	0	0	0	0	0	0	0	0	2.79287	3.32743	0	2.60293	0	0	0	1.92483	0	0	3.43962	2.97402	3.71799	4.08173	0	0	2.87225	0	0	0	0	0	0	0	0	0	0	0	0	0	0	0	0	0	0
PB.67846.122	Prc1	Prc1-S-122	ISM	1.86468	3.33425	3.80538	2.79601	3.3289	1.96174	0	0	0	0	4.69382	3.84979	2.66954	3.15298	2.87192	4.43406	0	2.63759	2.92112	0	0	0	0	0	0	0	0	0	0	0	0	0	0	0	0	0	0	0	0	0	0	0	0	0	0	0
PB.45746.1	Gm6710	Gm6710-S-1	NIC	0	0	0	0	0	0	0	0	0	0	0	0	0	0	0	0	0	0	0	0	0	0	0	0	0	0	0	0	0	0	0	0	0	0	0	0	0	0	0	0	0	0	0	0	0	0
PB.8503.25	Atp2b1	Atp2b1-S-25	NNC	0	0	0	0	0	0	0	0	0	0	0	2.41757	0	0	1.64244	1.6832	0	0	0	3.50757	0	0	0	0	0	3.37154	3.4716	0	0	0	0	0	0	0	0	0	0	0	0	0	0	0	0	0	0	0
PB.78794.116	Bmp15	Bmp15-S-116	FSM	0	0	0	0	0	1.96174	0	0	0	0	3.00104	0	2.04338	0	0	2.27886	0	0	1.92483	0	0	0	0	0	0	0	0	0	0	0	0	0	0	0	0	0	0	0	0	0	0	0	0	0	0	0
PB.21808.46	Bdp1	Bdp1-S-46	ISM	0	2.04954	0	0	0	1.96174	0	0	0	0	1.99726	0	0	0	2.23382	0	0	2.01354	0	0	0	0	0	0	0	0	0	0	0	0	0	0	0	0	0	0	0	0	0	0	0	0	0	0	0	0
PB.31037.1	Usp16	Usp16-S-1	ISM	3.66809	3.72776	3.6275	0	3.60758	3.9099	2.09948	0	2.19357	0	4.26348	4.13214	4.11822	3.15298	3.40699	4.74452	2.52389	4.52023	2.54223	3.50757	0	0	2.97402	0	3.40532	0	0	0	0	0	0	3.31925	3.10739	0	0	0	0	0	0	0	0	0	0	0	0	0
PB.62242.79	Ggct	Ggct-S-79	ISM	0	0	2.11911	0	2.2995	0	0	0	0	0	0	1.80981	0	2.76866	0	1.6832	2.15772	0	0	0	0	0	0	0	0	0	0	0	0	0	0	0	0	0	0	0	0	0	0	0	0	0	0	0	0	0
PB.45792.42	Gm14401	Gm14401-S-42	FSM	0	0	0	0	0	0	0	0	0	0	0	0	0	0	1.64244	0	0	0	0	0	0	0	0	0	0	0	0	0	0	0	0	0	0	0	0	0	0	0	0	0	0	0	0	0	0	0
PB.57752.65	Nup54	Nup54-S-65	ISM	1.86468	3.33425	0	0	0	1.96174	0	0	0	0	0	0	2.04338	2.13636	1.64244	1.6832	1.57395	0	0	0	0	0	0	0	0	0	0	0	0	0	0	0	0	0	0	0	0	0	0	0	0	0	0	0	0	0
PB.35826.24	Pkd2l2	Pkd2l2-S-24	NIC	1.86468	2.67612	2.75031	0	2.2995	1.96174	0	2.055	2.19357	2.1791	1.99726	2.41757	2.66954	2.76866	2.60293	3.13174	1.57395	0	1.92483	0	0	0	0	0	0	0	0	0	0	0	0	0	0	0	0	0	0	0	0	0	0	0	0	3.88715	0	0
PB.39533.12	Nolc1	Nolc1-S-12	ISM	1.86468	0	2.11911	0	2.94119	0	0	0	2.19357	0	2.62014	2.41757	0	3.42993	2.60293	3.13174	0	2.63759	0	0	0	0	0	0	2.74483	0	0	0	0	0	3.01019	0	0	0	0	0	0	0	0	0	0	0	0	0	0	0
PB.75191.3	Gm27164	Gm27164-S-3	NNC	0	2.04954	0	0	2.2995	1.96174	0	0	2.19357	0	1.99726	0	0	2.13636	1.64244	0	0	0	0	0	0	0	0	3.71799	0	0	0	0	0	0	0	0	0	0	0	0	0	0	0	0	0	0	0	0	0	0
PB.64860.83	Ipo8	Ipo8-S-83	ISM	1.86468	2.67612	0	2.16213	0	0	0	2.055	0	0	2.62014	1.80981	3.05164	2.13636	1.64244	2.6496	0	0	0	0	0	0	0	0	0	0	0	0	0	0	0	0	0	0	0	0	0	0	0	0	0	0	0	0	0	0
PB.66629.62	Tdrd12	Tdrd12-S-62	ISM	2.47719	0	0	0	0	0	0	0	0	0	1.99726	0	2.04338	0	1.64244	0	0	0	0	0	0	0	0	0	0	0	0	0	0	0	0	0	0	0	0	0	0	0	0	0	0	0	0	0	0	0
PB.11260.5	Cdc42se2	Cdc42se2-S-5	FSM	5.22806	4.00941	5.42951	0	4.50747	4.02545	5.66114	6.59213	5.66233	6.18822	3.95029	3.95302	3.32743	4.4207	4.6558	3.98142	5.94952	5.42997	5.6209	5.35369	5.42839	4.80156	5.12476	5.08591	4.7664	6.07974	6.08138	5.12257	5.87056	5.49473	3.67839	0	3.77792	5.16108	4.70402	5.05443	3.78336	4.71621	0	2.95272	0	0	3.6987	3.88715	0	5.554
PB.45823.4	Gm14322	Gm14322-S-4	NIC	0	0	0	0	0	0	0	2.055	0	0	0	0	0	0	0	0	0	0	0	0	0	0	0	0	0	0	0	0	0	0	0	0	0	0	0	0	0	0	0	0	0	0	0	0	0	0
PB.68649.1	Nlrp14	Nlrp14-S-1	ISM	0	2.04954	2.11911	0	0	0	0	0	2.19357	0	1.99726	2.41757	2.04338	2.76866	0	1.6832	0	0	0	0	0	0	0	0	0	0	0	0	0	0	0	0	0	0	0	0	0	0	0	0	0	0	0	0	0	0
PB.55337.9	Cdk11b	Cdk11b-S-9	ISM	0	2.67612	0	0	0	2.96193	0	0	0	0	3.49177	0	2.04338	3.15298	2.60293	3.13174	1.57395	2.01354	0	0	0	0	0	0	0	0	0	0	0	0	0	0	0	0	0	0	0	0	0	0	0	0	0	0	0	0
PB.9388.11	Ddit3	Ddit3-S-11	FSM	0	0	2.11911	2.16213	0	0	0	0	0	0	1.99726	0	0	2.13636	0	2.27886	0	0	0	0	0	0	0	0	0	0	0	2.87225	0	0	0	0	0	0	0	0	0	0	0	0	0	0	0	0	0	0
PB.25453.21	Rpl37	Rpl37-S-21	FSM	0	0	0	0	0	0	0	0	0	0	0	0	0	0	0	0	0	2.01354	0	2.84395	0	0	0	3.04884	0	0	0	0	0	0	3.67839	3.31925	4.17573	3.24901	3.13018	0	3.11271	0	4.1797	4.29908	0	4.81257	0	3.88715	0	0
PB.21184.14	Gm46430	Gm46430-S-14	NIC	0	0	0	0	0	0	0	0	0	0	0	0	0	0	0	0	0	0	0	0	0	0	0	0	0	0	0	0	0	0	0	0	0	0	0	0	0	0	0	0	0	0	0	0	0	0
PB.17434.28	Dpf3	Dpf3-S-28	NNC	1.86468	0	0	0	0	0	0	0	0	0	0	0	0	2.13636	2.23382	0	0	0	0	0	0	0	3.64129	0	2.74483	0	0	0	0	0	0	0	0	0	0	0	0	0	0	0	0	0	0	0	0	0
PB.48106.303	Ubap2l	Ubap2l-S-303	NIC	1.86468	2.67612	0	0	0	0	0	0	0	0	1.99726	0	0	0	0	1.6832	0	2.01354	0	0	0	0	0	0	0	0	0	0	0	0	0	0	0	0	0	0	0	0	0	0	0	0	0	0	0	0
PB.41198.5	Dpm2	Dpm2-S-5	FSM	0	0	0	0	2.2995	0	2.09948	2.055	2.19357	0	1.99726	0	2.04338	0	0	1.6832	2.15772	0	0	0	0	0	4.03797	0	0	0	0	0	0	0	0	0	3.77792	0	4.19922	3.47019	3.11271	2.96822	0	4.01592	0	0	0	0	4.19825	0
PB.43746.47	Blvra	Blvra-S-47	NIC	3.51819	3.05837	3.13424	3.18091	2.94119	1.96174	3.11288	3.06435	3.49252	2.81401	1.99726	1.80981	2.66954	2.13636	0	1.6832	3.17614	3.51002	2.54223	0	0	0	0	0	0	0	0	0	0	0	0	0	0	0	0	0	0	0	0	0	0	0	0	0	0	0
PB.65121.233	Rfpl4	Rfpl4-S-233	FSM	2.47719	2.04954	2.11911	0	3.60758	0	0	0	0	2.1791	2.62014	3.45491	2.66954	3.15298	2.23382	3.30676	0	0	0	0	0	0	0	0	0	0	0	2.87225	0	0	0	0	0	0	0	0	0	0	0	0	0	0	0	0	0	0
PB.63260.1	Ccdc174	Ccdc174-S-1	ISM	0	0	0	2.16213	0	1.96174	0	0	0	0	2.62014	0	3.32743	2.76866	2.60293	2.6496	1.57395	0	1.92483	0	0	0	0	0	0	0	0	0	0	0	0	0	0	0	0	0	0	0	0	0	0	0	0	0	0	0
PB.17746.35	Snw1	Snw1-S-35	ISM	0	3.05837	2.75031	2.16213	0	0	0	0	0	0	3.81951	3.06512	3.32743	2.76866	1.64244	3.13174	0	0	0	0	0	0	0	0	0	0	0	0	0	0	0	0	0	0	0	0	0	0	0	0	0	0	0	0	0	0
PB.37780.87	Sf3b2	Sf3b2-S-87	ISM	3.12744	0	0	0	0	0	0	0	0	0	0	3.06512	3.05164	0	1.64244	1.6832	0	3.01892	0	0	0	0	0	0	0	0	0	0	0	0	0	0	0	0	0	0	0	0	0	0	0	0	0	0	0	0
PB.45537.131	Pfdn4	Pfdn4-S-131	NNC	1.86468	2.04954	2.11911	0	0	0	0	0	0	0	0	0	0	2.76866	1.64244	2.6496	0	0	0	0	0	0	0	0	0	0	0	0	0	0	0	0	0	0	0	0	0	0	0	0	0	0	0	0	0	0
PB.35826.32	Pkd2l2	Pkd2l2-S-32	NNC	0	2.67612	2.75031	0	2.2995	0	0	0	2.19357	0	0	1.80981	3.05164	2.13636	1.64244	1.6832	0	2.63759	0	0	0	0	0	0	0	0	0	0	0	0	0	0	0	0	0	0	0	0	0	0	0	0	0	0	0	0
PB.57460.1	Srp72	Srp72-S-1	ISM	0	2.67612	0	0	0	0	0	2.055	2.19357	0	1.99726	2.41757	0	0	1.64244	2.27886	1.57395	0	0	0	0	0	0	0	0	0	0	0	0	0	0	0	0	0	0	0	0	0	0	0	0	0	0	0	0	0
PB.56153.54	Dnajb6	Dnajb6-S-54	ISM	0	0	0	0	0	0	0	0	0	0	0	0	0	2.13636	2.23382	0	0	0	0	2.84395	0	0	2.97402	0	3.79966	0	3.4716	0	3.94143	0	0	0	0	0	0	0	0	0	0	0	0	0	0	0	0	0
PB.19746.16	Riok1	Riok1-S-16	NIC	1.86468	2.67612	2.75031	0	2.2995	2.58199	0	2.055	2.19357	2.81401	3.66901	3.06512	3.87154	3.15298	3.08368	3.69994	0	3.29432	3.41016	2.84395	0	0	0	0	0	0	0	0	0	0	0	0	0	0	0	0	0	0	0	0	0	0	0	0	0	0
PB.45990.1	Prpf6	Prpf6-S-1	ISM	2.85426	3.05837	2.11911	2.79601	3.3289	2.58199	2.72941	2.055	0	0	4.56988	3.73467	3.05164	4.32659	2.87192	4.85281	1.57395	3.01892	1.92483	0	0	0	2.97402	0	2.74483	0	0	0	0	0	0	0	0	0	0	0	0	0	0	0	0	0	0	0	0	0
PB.8659.22	Ppp1r12a	Ppp1r12a-S-22	NNC	0	0	0	0	0	0	0	2.055	0	0	1.99726	0	2.66954	0	0	1.6832	0	0	1.92483	0	0	0	0	0	0	0	0	0	0	0	0	0	0	0	0	0	0	0	0	0	0	0	0	0	0	0
PB.77394.60	Pls1	Pls1-S-60	ISM	0	0	2.75031	0	0	1.96174	0	0	0	0	0	1.80981	2.66954	2.13636	0	1.6832	0	0	0	0	0	0	0	0	2.74483	0	0	0	0	0	0	0	0	0	0	0	0	0	0	0	0	0	0	0	0	0
PB.49929.175	Dnajb4	Dnajb4-S-175	ISM	1.86468	0	2.11911	0	0	0	0	0	0	0	2.62014	0	0	2.76866	1.64244	0	0	0	0	0	0	0	0	0	0	0	0	0	0	0	0	0	0	0	0	0	0	0	0	0	0	0	0	0	0	0
PB.60633.2	Ubl3	Ubl3-S-2	FSM	1.86468	2.04954	2.11911	0	0	0	0	0	0	2.81401	1.99726	0	0	0	0	0	1.57395	0	2.92112	2.84395	0	0	0	3.04884	0	2.71216	2.80904	0	0	0	0	0	0	0	0	0	0	0	0	0	3.88458	0	0	0	0	0
PB.27279.36	Triobp	Triobp-S-36	ISM	0	3.05837	2.11911	0	0	0	0	0	0	2.1791	0	3.06512	2.04338	0	2.87192	2.27886	2.15772	2.01354	1.92483	2.84395	0	0	0	3.04884	2.74483	0	0	2.87225	0	0	3.01019	0	0	0	0	0	3.11271	0	0	2.95272	0	0	0	0	0	0
PB.7948.70	Gm32687	Gm32687-S-70	FSM	1.86468	2.04954	0	0	0	0	0	0	0	0	0	0	2.04338	0	0	2.6496	0	0	0	0	0	0	0	0	0	0	0	0	0	0	0	0	3.10739	0	0	0	0	0	0	0	0	0	0	0	0	0
PB.68724.259	Tmem41b	Tmem41b-S-259	FSM	0	0	0	0	0	0	0	0	0	0	0	0	0	0	0	0	0	0	0	0	0	0	0	0	0	0	0	0	0	0	0	3.31925	0	0	0	0	0	0	0	0	0	0	0	0	0	0
PB.40216.72	Taf3	Taf3-S-72	ISM	0	0	0	0	0	0	0	0	0	0	1.99726	0	2.66954	2.13636	1.64244	0	0	2.01354	1.92483	0	0	0	0	0	0	0	0	0	0	0	0	0	0	0	0	0	0	0	0	0	0	0	0	0	0	0
PB.3949.83	Swt1	Swt1-S-83	ISM	0	3.72776	2.11911	0	2.2995	2.96193	2.09948	2.68196	2.82934	0	3.00104	3.45491	3.05164	3.82454	3.53637	4.06003	0	3.01892	1.92483	0	0	0	0	0	3.40532	0	0	0	0	0	0	0	3.77792	0	0	0	0	0	3.11123	0	0	0	0	0	0	0
PB.78078.1780	Fbxw15	Fbxw15-S-1780	ISM	2.47719	3.05837	2.75031	2.16213	2.94119	2.58199	0	0	0	0	1.99726	2.41757	2.04338	0	0	2.27886	1.57395	2.01354	0	0	0	0	0	0	0	0	0	2.87225	0	0	0	0	0	0	0	0	0	0	0	0	0	0	0	0	0	0
PB.78037.3	Ip6k2	Ip6k2-S-3	NIC	1.86468	0	3.13424	0	2.94119	0	0	0	0	0	3.00104	3.27889	3.05164	2.13636	1.64244	2.91945	0	0	0	0	2.99065	0	0	0	3.79966	0	0	0	0	0	0	0	0	0	0	0	0	0	0	0	0	0	0	0	0	0
PB.60079.23	A430033K04Rik	A430033K04Rik-S-23	FSM	2.47719	3.05837	2.75031	0	2.2995	1.96174	2.09948	0	0	0	2.62014	1.80981	3.05164	2.13636	0	2.6496	0	0	0	0	0	0	0	0	0	0	0	0	0	0	0	0	0	0	0	0	0	0	0	0	0	0	0	0	0	0
PB.37353.3	Txnl4a	Txnl4a-S-3	NIC	0	0	0	0	0	0	0	0	0	0	0	0	0	0	1.64244	2.6496	0	2.63759	0	3.50757	0	0	0	3.71799	3.40532	0	2.80904	3.5367	0	0	0	0	0	0	0	0	0	0	0	2.95272	0	0	0	0	0	0
PB.24313.124	Esco2	Esco2-S-124	ISM	0	2.04954	0	0	0	0	0	0	0	0	0	1.80981	3.05164	2.13636	0	2.27886	0	0	2.54223	0	0	0	0	0	0	0	0	0	0	0	0	0	0	0	0	0	0	0	0	0	3.88458	0	0	0	0	0
PB.77182.191	Me1	Me1-S-191	NNC	0	0	0	0	0	0	0	0	0	0	0	2.41757	0	0	2.23382	2.6496	0	3.01892	0	0	0	0	0	0	2.74483	0	0	0	0	0	0	0	0	0	0	0	0	0	0	0	0	0	0	0	0	0
PB.6444.38	Fig4	Fig4-S-38	ISM	0	2.04954	0	0	0	0	0	0	0	0	0	0	0	0	0	0	0	0	0	0	0	0	0	0	0	0	0	0	0	0	0	0	0	0	0	0	0	0	0	2.95272	3.88458	4.12752	0	0	0	0
PB.70415.3	2810030D12Rik	2810030D12Rik-S-3	FSM	0	0	0	0	0	0	0	0	0	2.1791	0	1.80981	0	2.13636	0	1.6832	0	0	0	0	0	0	0	0	0	0	0	0	0	0	0	0	0	0	0	0	0	0	0	0	0	0	0	0	0	0
PB.9367.6	Os9	Os9-S-6	ISM	0	0	0	0	0	0	0	0	0	0	0	3.06512	2.66954	0	0	0	1.57395	0	0	0	0	0	0	0	0	3.7655	0	0	0	0	0	0	0	0	0	0	0	0	0	0	0	0	0	0	0	0
PB.24476.57	Npm2	Npm2-S-57	NNC	3.66809	3.55023	4.2034	3.18091	4.15551	3.45185	3.60575	2.055	2.19357	0	3.66901	4.13214	4.48092	4.2227	3.25834	4.43406	3.32431	3.51002	1.92483	0	0	0	2.97402	0	0	0	2.80904	0	0	0	0	0	0	0	0	0	0	0	0	0	0	0	0	0	0	0
PB.42036.3	Ppig	Ppig-S-3	NIC	0	0	0	0	0	1.96174	0	0	0	0	1.99726	2.41757	2.66954	2.13636	0	2.6496	0	2.01354	0	0	0	0	0	0	0	0	0	0	0	0	0	0	0	0	0	0	0	0	0	0	0	0	0	0	0	0
PB.4726.16	Fmn2	Fmn2-S-16	NNC	0	0	0	0	0	0	0	0	0	0	1.99726	0	0	0	2.23382	0	0	0	0	2.84395	3.65835	0	0	0	0	2.71216	0	2.87225	0	0	0	0	0	0	0	0	0	0	0	0	0	0	0	0	0	0
PB.3376.7	Slc45a3	Slc45a3-S-7	ISM	0	0	0	0	0	0	0	0	0	0	2.62014	2.41757	2.66954	0	2.60293	2.6496	0	0	0	3.50757	3.65835	3.43962	2.97402	3.04884	3.40532	3.37154	3.4716	4.61571	0	0	0	0	0	0	0	0	0	0	0	0	0	0	0	0	0	0
PB.16866.3	Dmac2l	Dmac2l-S-3	FSM	0	0	0	0	0	0	0	0	0	0	0	0	0	0	0	0	0	0	0	0	0	0	0	0	0	0	0	0	0	0	0	0	0	0	0	0	0	0	0	3.61942	0	0	0	0	0	0
PB.42950.72	Ehf	Ehf-S-72	NIC	2.47719	2.04954	2.11911	2.16213	3.3289	0	2.72941	0	2.19357	0	2.62014	0	3.05164	0	1.64244	3.13174	0	2.63759	0	0	0	0	0	0	0	0	0	0	0	0	0	0	0	0	0	0	0	0	0	0	0	0	0	0	0	0
PB.62103.276	Hnrnpa2b1	Hnrnpa2b1-S-276	ISM	1.86468	3.55023	2.75031	0	0	0	0	0	2.19357	0	3.27621	2.41757	3.32743	3.15298	1.64244	3.30676	1.57395	2.63759	3.19524	0	0	0	0	0	0	0	0	0	0	0	0	0	0	0	0	0	0	0	0	0	0	0	0	0	0	0
PB.53867.14	Dnajc8	Dnajc8-S-14	ISM	1.86468	2.04954	0	2.16213	0	2.58199	0	0	0	0	1.99726	1.80981	0	0	2.60293	2.6496	1.57395	0	0	0	0	0	0	0	0	0	0	0	0	0	0	0	0	0	0	0	0	0	0	0	0	0	0	0	0	0
PB.10934.189	Timd2	Timd2-S-189	NIC	0	2.04954	2.11911	0	0	0	0	0	0	0	0	0	2.04338	2.13636	0	0	1.57395	0	0	0	0	0	0	0	0	0	0	0	0	0	3.01019	3.99414	0	3.24901	0	0	0	0	0	2.95272	0	0	3.6987	0	0	0
PB.64175.8	Ptms	Ptms-S-8	ISM	1.86468	0	2.11911	2.16213	0	0	0	2.055	0	0	0	0	2.04338	0	0	0	1.57395	0	0	0	0	0	0	0	0	0	2.80904	0	0	0	0	0	3.10739	0	0	0	0	0	0	0	0	0	0	0	0	0
PB.51647.3	Hsdl2	Hsdl2-S-3	ISM	2.47719	0	3.13424	2.16213	2.2995	0	0	0	0	0	3.00104	2.79287	2.66954	2.76866	3.08368	3.13174	0	2.01354	0	0	0	0	0	0	2.74483	0	0	0	0	0	0	0	0	0	0	0	0	0	0	0	0	0	0	0	0	0
PB.2368.11	Psmd1	Psmd1-S-11	ISM	0	2.04954	2.11911	0	0	1.96174	0	0	2.19357	0	1.99726	3.06512	0	2.13636	1.64244	1.6832	0	0	0	0	0	0	0	0	0	0	0	0	0	0	0	0	0	0	0	0	0	0	0	0	0	0	0	0	0	0
PB.19746.17	Riok1	Riok1-S-17	NIC	0	0	2.75031	0	2.2995	1.96174	2.72941	0	0	2.1791	0	3.45491	3.05164	2.76866	2.23382	3.80283	0	2.63759	1.92483	0	0	0	0	0	0	0	0	0	0	0	0	0	0	0	0	0	0	0	0	0	0	0	0	0	0	0
PB.76462.40	Rbpms2	Rbpms2-S-40	ISM	0	0	2.11911	0	0	2.96193	0	0	0	0	3.00104	0	3.05164	0	2.87192	2.6496	0	0	1.92483	0	2.99065	0	2.97402	0	0	2.71216	0	2.87225	0	0	0	0	0	0	0	0	0	0	0	0	0	0	0	3.88715	0	0
PB.75793.89	Rdx	Rdx-S-89	NNC	2.85426	0	2.75031	0	3.60758	0	0	0	2.19357	0	1.99726	2.79287	0	0	1.64244	2.6496	2.15772	2.01354	1.92483	2.84395	0	0	0	0	2.74483	0	0	0	0	0	0	0	0	0	0	0	0	0	0	0	0	0	0	0	0	0
PB.17780.303	Gm10436	Gm10436-S-303	FSM	0	0	0	0	0	0	0	0	0	0	0	0	2.04338	0	1.64244	0	0	0	0	0	2.99065	0	0	0	3.79966	0	3.4716	0	3.94143	0	0	0	0	0	0	0	0	0	0	0	0	0	0	0	0	0
PB.43124.4	Ccdc34	Ccdc34-S-4	ISM	3.12744	3.72776	4.08749	2.79601	4.40333	2.58199	3.38938	2.68196	2.19357	2.1791	3.66901	4.4158	4.11822	4.4207	3.75367	4.26443	2.52389	3.68734	3.19524	0	0	0	0	0	2.74483	0	0	0	0	0	0	0	0	0	0	0	0	0	0	0	0	0	0	0	0	0
PB.63353.22	Kbtbd8	Kbtbd8-S-22	ISM	0	2.04954	2.75031	0	2.2995	0	2.09948	0	0	0	1.99726	2.79287	3.05164	3.15298	0	2.6496	0	0	0	0	0	0	0	0	0	0	0	0	0	0	0	0	0	0	0	0	0	0	0	0	0	0	0	0	0	0
PB.21177.31	Gm47467	Gm47467-S-31	FSM	0	0	0	0	0	0	0	0	0	0	0	0	0	0	0	0	0	0	0	0	0	0	0	0	0	0	0	0	0	0	3.01019	0	0	0	0	0	0	0	0	0	0	0	0	0	0	0
PB.31591.12	Rnaset2b	Rnaset2b-S-12	FSM	0	0	0	0	0	0	0	0	0	0	0	0	0	2.13636	1.64244	1.6832	0	0	1.92483	2.84395	0	0	0	0	0	0	0	2.87225	0	0	0	0	0	0	0	0	0	0	0	0	0	0	0	0	0	0
PB.66058.296	Nlrp9c	Nlrp9c-S-296	NIC	1.86468	0	2.11911	0	2.2995	1.96174	0	0	2.19357	0	0	0	2.66954	2.76866	3.08368	2.6496	0	0	2.54223	0	0	0	0	0	0	0	0	0	0	0	0	0	0	0	0	0	0	0	0	0	0	0	0	0	0	0
PB.43501.147	Ccndbp1	Ccndbp1-S-147	ISM	0	0	0	0	0	0	0	0	0	2.81401	0	0	0	0	0	2.91945	0	0	0	2.84395	0	3.43962	0	0	0	0	0	0	0	0	0	0	0	0	0	0	0	0	0	0	0	0	0	0	0	0
PB.44856.91	Rpn2	Rpn2-S-91	ISM	0	0	0	0	0	0	0	0	0	0	0	0	0	2.13636	0	0	0	0	0	0	0	0	0	0	0	0	0	0	0	0	3.01019	0	0	0	0	3.47019	0	0	0	0	0	0	0	0	4.19825	0
PB.57880.101	Gm3286	Gm3286-S-101	NIC	0	0	0	0	0	0	0	0	0	0	0	0	0	0	0	0	0	0	0	0	0	0	0	0	0	0	0	0	0	0	0	0	0	0	0	0	3.11271	0	3.11123	0	0	0	0	0	0	0
PB.56628.34	Lyar	Lyar-S-34	ISM	4.41653	4.48792	4.48734	3.45816	4.68795	4.12902	3.11288	2.68196	2.19357	2.1791	4.69382	4.4158	4.95617	4.72764	3.75367	5.09475	3.67013	3.96874	3.98315	3.50757	0	0	0	0	2.74483	0	0	2.87225	0	0	0	0	0	0	0	0	0	0	0	0	0	0	0	0	0	0
PB.71738.1	Msmo1	Msmo1-S-1	ISM	4.41653	4.22892	3.6275	3.45816	3.3289	3.45185	4.61775	4.32909	4.48457	4.023	3.95029	4.04659	3.72086	3.97556	3.40699	2.91945	4.78412	4.08443	4.55034	3.903	0	0	2.97402	0	0	4.04737	3.86665	3.93241	4.62482	0	0	0	0	0	0	3.47019	0	0	0	0	0	0	0	3.88715	0	0
PB.14214.16	Myl4	Myl4-S-16	NNC	3.66809	3.87847	0	4.25144	4.00396	3.45185	4.18139	3.55633	3.49252	3.69366	3.00104	2.41757	3.05164	3.42993	3.75367	3.89611	2.15772	3.96874	3.58696	3.50757	2.99065	0	2.97402	4.11533	0	3.37154	0	2.87225	0	0	0	0	0	0	0	0	0	0	0	2.95272	0	0	0	0	0	0
PB.40766.1	Snapc4	Snapc4-S-1	ISM	0	0	0	0	0	0	0	0	0	0	0	0	0	0	0	0	0	0	0	0	0	0	0	0	0	0	0	0	0	0	0	0	0	0	0	3.47019	3.11271	0	0	2.95272	0	0	0	0	4.19825	0
PB.56420.493	Slbp	Slbp-S-493	ISM	1.86468	0	2.11911	0	0	0	0	0	0	0	2.62014	0	2.04338	0	0	1.6832	0	0	0	0	2.99065	0	0	0	0	0	0	0	0	0	0	0	0	0	0	0	0	0	0	0	0	0	0	0	0	0
PB.17780.296	Gm10436	Gm10436-S-296	FSM	0	0	0	0	0	0	0	0	0	0	0	0	0	2.76866	2.23382	0	0	0	0	0	2.99065	0	0	0	2.74483	0	0	0	3.94143	0	0	0	0	0	0	0	0	0	0	0	0	0	0	0	0	0
PB.10770.305	Mat2b	Mat2b-S-305	ISM	2.47719	3.87847	3.13424	0	2.2995	0	0	0	2.19357	0	2.62014	1.80981	3.32743	2.76866	2.23382	3.58524	0	0	0	0	0	0	2.97402	0	0	0	0	0	0	0	0	0	0	0	0	0	0	0	0	0	0	0	0	0	0	0
PB.65915.1	Gm36159	Gm36159-S-1	FSM	2.85426	2.67612	2.11911	2.79601	2.2995	2.58199	0	2.055	0	0	3.00104	3.45491	3.87154	3.15298	2.60293	3.30676	1.57395	0	3.19524	2.84395	0	0	2.97402	3.71799	3.40532	0	3.4716	3.5367	3.94143	0	0	0	0	0	0	0	0	0	0	0	0	0	0	0	0	0
PB.21960.36	Ppwd1	Ppwd1-S-36	ISM	3.12744	3.05837	3.41098	0	2.2995	2.96193	0	0	0	0	3.27621	2.41757	2.66954	4.10675	2.60293	2.91945	1.57395	2.01354	0	2.84395	0	0	0	0	0	0	0	0	0	0	0	0	0	0	0	0	0	0	0	0	0	0	0	0	0	0
PB.54056.4	Hmgn2	Hmgn2-S-4	FSM	3.51819	3.33425	0	3.18091	2.94119	0	3.11288	0	2.82934	2.81401	3.00104	3.84979	2.04338	2.13636	0	3.80283	2.15772	2.01354	1.92483	4.40572	2.99065	0	2.97402	0	0	0	0	3.5367	0	5.78138	5.04555	4.39345	5.36889	3.24901	3.13018	3.47019	3.11271	4.03197	3.11123	2.95272	5.25533	5.72398	5.46962	5.25794	4.88385	0
PB.2391.355	Ncl	Ncl-S-355	ISM	0	2.04954	0	0	0	0	0	0	0	0	1.99726	2.79287	3.05164	2.13636	1.64244	2.91945	0	2.63759	0	0	0	0	0	0	0	0	0	0	0	0	0	0	0	0	0	0	0	0	0	0	0	0	0	0	0	0
PB.46136.68	Tpd52	Tpd52-S-68	ISM	0	0	0	0	0	0	0	0	0	0	0	0	0	0	0	0	0	0	0	0	0	0	0	3.04884	0	0	0	0	0	0	0	0	0	3.24901	0	3.47019	0	0	0	0	0	0	0	0	0	0
PB.48243.2	1700040D17Rik	1700040D17Rik-S-2	FSM	4.01708	3.72776	2.75031	3.18091	3.3289	2.58199	3.78354	3.06435	3.49252	2.81401	3.00104	3.06512	2.04338	3.42993	1.64244	3.30676	3.17614	3.51002	1.92483	0	2.99065	0	0	3.04884	0	3.7655	0	2.87225	0	0	0	0	0	0	0	0	0	0	0	0	3.88458	0	0	0	0	0
PB.45975.40	Tpd52l2	Tpd52l2-S-40	NIC	0	0	0	0	0	0	2.09948	0	2.19357	0	1.99726	0	0	0	0	0	2.15772	0	0	0	0	0	0	0	0	0	0	0	0	0	0	0	0	0	0	0	0	0	0	0	0	0	0	0	0	0
PB.53730.35	Zcchc17	Zcchc17-S-35	ISM	1.86468	0	0	0	0	0	0	0	0	0	0	0	0	0	0	1.6832	0	0	0	0	0	0	0	0	0	0	0	0	0	0	0	0	0	0	3.13018	0	0	0	3.78185	0	0	0	0	0	0	0
PB.82093.74	Zrsr2	Zrsr2-S-74	ISM	0	0	2.11911	0	2.94119	2.58199	2.09948	0	0	0	0	1.80981	2.66954	2.13636	0	1.6832	1.57395	0	1.92483	0	0	0	0	0	0	0	0	0	0	0	0	0	0	0	0	0	0	0	0	0	0	0	0	0	0	0
PB.49933.589	Nexn	Nexn-S-589	ISM	0	2.04954	2.75031	0	2.2995	0	0	0	0	0	2.62014	3.27889	0	2.13636	2.60293	2.6496	0	0	0	0	0	0	0	0	0	0	0	0	0	0	0	0	0	0	0	0	0	0	0	0	0	0	0	0	0	0
PB.65775.4	Nlrp9b	Nlrp9b-S-4	NIC	1.86468	2.04954	0	0	0	0	0	0	0	0	0	1.80981	0	2.13636	0	1.6832	0	0	0	0	0	0	0	0	0	0	0	0	0	0	0	0	0	0	0	0	0	0	0	0	0	0	0	0	0	0
PB.33986.61	Gtf2f1	Gtf2f1-S-61	ISM	1.86468	2.04954	0	2.79601	0	0	0	0	0	0	0	2.79287	2.66954	3.15298	0	1.6832	1.57395	2.01354	1.92483	0	0	0	0	0	0	0	0	0	0	0	0	0	0	0	0	0	0	0	0	0	0	0	0	3.88715	0	0
PB.2391.369	Ncl	Ncl-S-369	ISM	3.51819	4.40881	3.6275	2.16213	4.00396	3.23659	2.09948	0	0	2.1791	4.06593	4.284	4.74652	4.10675	3.65091	5.35363	3.45333	5.53773	2.92112	0	0	0	0	0	2.74483	0	0	2.87225	0	0	0	0	0	0	0	0	0	0	0	0	3.88458	0	0	0	0	0
PB.4667.88	Dcaf8	Dcaf8-S-88	ISM	0	2.04954	0	2.16213	0	0	0	0	0	0	0	1.80981	0	0	2.23382	1.6832	0	0	0	0	0	0	0	0	0	0	0	0	0	0	0	0	0	0	0	0	0	0	0	0	0	0	0	0	0	0
PB.63114.19	Gm5577	Gm5577-S-19	NNC	0	0	0	0	0	0	2.09948	0	0	0	0	0	0	0	0	0	0	0	0	0	0	0	0	0	0	0	0	0	0	0	3.01019	0	0	0	0	3.47019	0	3.63534	0	2.95272	0	0	0	0	0	0
PB.79804.3	Phf6	Phf6-S-3	ISM	0	0	0	0	2.2995	0	0	0	2.19357	0	0	0	0	2.13636	0	1.6832	0	0	0	0	0	0	0	0	2.74483	0	0	0	0	0	0	0	0	0	0	0	0	0	0	0	0	0	0	0	0	0
PB.43893.19	Nop56	Nop56-S-19	FSM	0	2.04954	0	0	0	0	0	2.055	0	0	1.99726	0	0	0	1.64244	0	2.15772	2.01354	0	0	0	0	0	0	0	0	0	0	0	0	0	0	0	0	0	0	0	0	0	0	0	0	0	0	0	0
PB.55574.54	Dmtf1	Dmtf1-S-54	ISM	0	2.04954	0	0	0	0	0	0	0	0	0	2.41757	0	2.13636	1.64244	1.6832	0	0	0	0	0	0	0	0	0	0	0	0	0	0	0	0	0	0	0	0	0	0	0	0	0	0	0	0	0	0
PB.65737.6	Apoc1	Apoc1-S-6	NIC	0	0	0	0	0	0	0	0	0	0	0	0	0	0	0	0	0	0	0	0	0	0	0	0	0	0	0	0	0	0	0	0	0	0	0	0	0	0	0	0	0	0	0	0	0	0
PB.45796.11	Gm14410	Gm14410-S-11	NIC	0	0	0	0	0	0	0	0	0	0	0	0	0	0	0	0	0	0	0	0	0	0	0	0	0	0	0	0	0	0	0	0	0	0	0	0	0	0	0	0	0	0	0	0	0	0
PB.8355.196	Metap2	Metap2-S-196	ISM	1.86468	0	0	0	0	1.96174	0	0	0	0	0	0	0	2.13636	0	1.6832	0	2.01354	0	0	2.99065	0	0	0	0	0	0	0	0	0	0	0	0	0	0	0	0	0	0	0	0	0	0	0	0	0
PB.14584.16	Fam104a	Fam104a-S-16	NNC	2.47719	2.04954	2.11911	0	2.2995	0	0	2.68196	2.19357	2.1791	1.99726	2.41757	2.66954	0	0	2.6496	2.52389	3.01892	1.92483	0	0	0	0	0	0	2.71216	2.80904	0	0	0	0	0	0	0	0	0	0	0	0	0	0	0	0	0	0	0
PB.12212.4	Zfp735	Zfp735-S-4	FSM	1.86468	0	0	0	2.2995	0	0	0	0	0	0	2.41757	2.04338	0	0	1.6832	0	0	0	0	0	0	0	0	0	0	0	0	0	0	0	0	0	0	0	0	0	0	0	0	0	0	0	0	0	0
PB.64866.65	Sinhcaf	Sinhcaf-S-65	ISM	0	0	0	0	2.2995	0	0	0	0	0	1.99726	0	3.05164	2.76866	0	1.6832	0	2.63759	0	0	0	0	0	0	0	0	0	0	0	0	0	0	0	0	0	0	0	0	0	0	0	0	0	0	0	0
PB.39308.23	R3hcc1l	R3hcc1l-S-23	NNC	0	0	0	0	0	1.96174	0	0	0	0	0	1.80981	0	0	1.64244	2.27886	0	0	0	0	0	0	0	0	0	0	0	2.87225	0	0	0	0	0	0	0	0	0	0	0	0	0	0	0	0	0	0
PB.11018.152	Canx	Canx-S-152	ISM	1.86468	0	0	0	0	0	0	0	0	0	1.99726	1.80981	0	0	0	2.27886	0	2.01354	0	2.84395	0	0	0	0	0	0	0	0	0	0	0	0	0	0	0	0	0	0	0	0	0	0	0	0	0	0
PB.66146.3	Zfp60	Zfp60-S-3	FSM	0	0	0	0	0	0	0	0	0	0	1.99726	0	0	0	0	0	0	0	0	0	0	0	0	0	0	0	0	0	0	0	0	0	0	0	0	0	0	0	0	0	0	0	0	0	0	0
PB.42109.46	Dync1i2	Dync1i2-S-46	NNC	3.34178	2.04954	3.6275	0	4.00396	3.45185	2.09948	0	0	0	3.27621	4.04659	3.72086	4.50671	3.75367	3.89611	1.57395	3.01892	1.92483	0	0	0	0	0	0	0	0	0	0	0	0	0	0	0	0	0	0	0	0	0	0	0	0	0	0	0
PB.78179.25	Lrrfip2	Lrrfip2-S-25	ISM	0	0	0	0	0	0	0	2.055	0	0	0	1.80981	0	0	0	0	1.57395	0	0	0	2.99065	0	0	0	0	0	0	0	0	0	0	0	0	0	0	0	0	0	3.11123	0	0	0	0	0	0	0
PB.12564.43	Supt6	Supt6-S-43	ISM	0	2.67612	0	3.18091	0	1.96174	0	0	0	0	3.00104	0	2.04338	2.13636	2.60293	2.6496	0	2.01354	0	0	0	0	0	0	0	0	0	0	0	0	0	0	0	0	0	0	0	0	0	0	0	0	0	0	0	0
PB.53137.38	Foxj3	Foxj3-S-38	NNC	0	0	0	0	0	1.96174	0	0	0	0	0	0	0	0	0	2.27886	1.57395	0	0	2.84395	2.99065	3.43962	0	0	0	0	0	0	0	0	0	0	0	0	0	0	0	0	0	0	0	0	0	0	0	0
PB.8568.2	Cep290	Cep290-S-2	ISM	0	0	0	0	0	1.96174	0	0	0	0	1.99726	1.80981	2.04338	0	0	0	0	2.63759	0	0	0	0	0	0	0	0	0	0	0	0	0	0	0	0	0	0	0	0	0	0	0	0	0	0	0	0
PB.81745.3	Smc1a	Smc1a-S-3	ISM	0	2.04954	0	0	0	0	0	0	0	0	0	1.80981	2.66954	2.76866	0	0	1.57395	0	0	0	0	0	0	0	0	0	0	0	0	0	0	0	0	0	0	0	0	0	0	0	0	0	0	0	0	0
PB.20755.15	Gm5141	Gm5141-S-15	FSM	0	0	0	0	0	0	0	0	0	0	0	0	0	0	0	0	0	0	0	0	0	0	0	0	0	0	0	0	0	0	0	0	0	0	0	0	0	0	0	0	0	0	0	0	0	0
PB.26658.41	Atad2	Atad2-S-41	ISM	0	2.04954	0	0	0	1.96174	0	0	0	0	0	1.80981	2.04338	0	2.23382	1.6832	0	0	0	0	0	0	0	0	0	0	0	0	0	0	0	0	0	0	0	0	0	0	0	0	0	0	0	0	0	0
PB.43111.2	Kif18a	Kif18a-S-2	ISM	1.86468	0	0	0	0	0	0	0	0	0	0	2.41757	0	2.13636	1.64244	2.6496	0	0	0	0	3.65835	0	0	0	0	0	0	0	0	0	0	0	0	0	0	0	0	0	0	0	0	0	0	0	0	0
PB.69316.30	Hirip3	Hirip3-S-30	FSM	0	0	2.11911	0	0	0	0	0	0	2.1791	0	0	2.66954	2.13636	1.64244	2.27886	0	0	1.92483	0	0	0	2.97402	0	0	0	0	0	0	0	0	0	0	0	0	0	0	0	0	0	0	0	0	0	0	0
PB.20347.73	Cltb	Cltb-S-73	ISM	0	2.67612	0	0	0	1.96174	0	0	2.19357	0	0	2.41757	2.04338	2.13636	0	2.27886	0	2.63759	0	0	0	0	0	0	2.74483	0	0	0	0	0	0	0	0	0	0	0	0	0	0	0	0	0	0	0	0	0
PB.64061.22	Dppa3	Dppa3-S-22	ISM	3.34178	2.04954	4.30727	0	3.82529	1.96174	2.09948	0	0	0	3.66901	3.06512	3.05164	2.13636	2.60293	2.6496	2.15772	2.01354	0	0	0	0	0	3.04884	2.74483	0	0	0	4.62482	0	3.01019	0	0	0	0	0	0	0	0	0	0	0	0	0	0	0
PB.54713.321	Gm13103	Gm13103-S-321	FSM	0	0	0	0	0	0	0	0	0	0	0	0	2.04338	0	3.40699	1.6832	0	0	0	2.84395	0	0	0	0	0	0	0	2.87225	0	0	0	0	0	0	0	0	0	0	0	0	0	0	0	0	0	0
PB.16033.30	Lamb1	Lamb1-S-30	ISM	0	0	0	0	0	0	0	0	0	0	0	2.41757	0	0	1.64244	0	0	0	0	2.84395	2.99065	0	0	0	0	0	0	3.5367	0	0	0	0	0	0	0	0	0	0	0	0	0	0	0	0	0	0
PB.65337.22	Pla2g4c	Pla2g4c-S-22	ISM	0	2.67612	3.13424	0	0	1.96174	0	0	0	0	3.00104	1.80981	2.66954	3.15298	2.60293	2.91945	0	0	0	0	0	0	2.97402	0	3.40532	0	0	0	0	0	0	0	0	0	0	0	0	0	0	0	0	0	0	0	0	0
PB.29148.83	Mcm4	Mcm4-S-83	ISM	1.86468	0	0	0	0	0	0	0	0	0	1.99726	1.80981	2.04338	0	1.64244	0	0	0	0	0	0	0	0	0	0	0	0	0	0	0	0	0	0	0	0	0	0	0	0	0	0	0	0	0	0	0
PB.44295.186	Crnkl1	Crnkl1-S-186	ISM	0	0	0	0	0	0	0	0	0	0	2.62014	0	2.66954	0	1.64244	1.6832	0	0	0	0	0	0	0	0	0	0	0	2.87225	0	0	0	0	0	0	0	0	0	0	0	0	0	0	0	0	0	0
PB.10819.13	Slu7	Slu7-S-13	ISM	0	2.04954	2.11911	0	0	0	0	0	0	0	0	2.79287	0	0	1.64244	2.6496	1.57395	2.63759	2.92112	0	3.65835	0	0	0	0	0	0	0	0	0	0	0	0	0	0	0	0	0	0	0	0	0	0	0	0	0
PB.22653.37	Rpl15	Rpl15-S-37	NNC	0	0	0	0	0	0	0	0	0	0	0	0	0	0	0	0	0	0	0	0	0	0	0	0	0	0	0	0	0	0	0	0	0	0	0	0	0	0	0	0	0	0	0	0	0	0
PB.55788.5	Tmem60	Tmem60-S-5	FSM	1.86468	2.04954	2.11911	0	0	0	0	0	0	0	1.99726	1.80981	3.05164	0	0	2.27886	0	0	0	2.84395	2.99065	0	0	3.04884	2.74483	3.37154	2.80904	0	0	0	0	0	0	0	0	3.47019	0	0	0	0	0	0	0	3.88715	4.19825	0
PB.24476.61	Npm2	Npm2-S-61	ISM	2.85426	3.05837	2.75031	0	0	2.58199	0	0	2.19357	0	1.99726	0	0	2.76866	1.64244	2.27886	0	0	0	0	0	0	0	0	0	0	0	0	0	0	0	0	0	0	0	0	0	0	0	0	0	0	0	0	0	0
PB.44682.289	Eif2s2	Eif2s2-S-289	ISM	0	0	0	0	0	1.96174	0	0	0	0	0	1.80981	2.04338	0	1.64244	1.6832	0	0	0	0	0	0	0	0	2.74483	0	0	0	0	0	0	3.31925	0	0	0	0	0	0	0	0	0	0	0	0	0	0
PB.26120.2	Erich5	Erich5-S-2	ISM	0	2.04954	2.11911	0	2.2995	0	0	0	2.19357	0	1.99726	1.80981	3.32743	0	2.60293	3.30676	0	2.01354	0	0	0	0	0	0	0	0	0	2.87225	0	0	0	0	0	0	0	0	0	0	0	0	0	0	0	0	0	0
PB.42050.9	Ssb	Ssb-S-9	ISM	1.86468	2.67612	2.11911	0	0	1.96174	0	0	0	0	0	3.60454	3.05164	3.64657	3.84685	3.98142	1.57395	0	1.92483	0	0	0	0	0	0	0	0	2.87225	0	0	0	0	0	0	0	0	0	0	0	0	0	0	0	0	0	0
PB.26397.117	Rspo2	Rspo2-S-117	FSM	1.86468	2.04954	0	0	0	0	0	2.055	0	0	3.00104	2.79287	3.54337	2.13636	2.23382	2.27886	0	2.63759	1.92483	0	0	0	0	0	0	0	0	0	0	0	0	0	0	0	0	0	0	0	0	0	0	0	0	0	0	0
PB.2391.366	Ncl	Ncl-S-366	ISM	0	3.55023	2.11911	3.18091	2.2995	1.96174	0	2.055	2.19357	0	2.62014	1.80981	4.11822	2.76866	2.23382	4.06003	0	3.83791	0	0	0	0	0	0	2.74483	0	0	0	0	0	0	0	0	0	0	0	0	0	0	0	0	0	0	0	0	0
PB.20162.68	Cenpp	Cenpp-S-68	ISM	2.47719	2.67612	3.13424	0	2.2995	1.96174	0	0	0	0	1.99726	1.80981	2.04338	2.76866	2.23382	1.6832	0	0	1.92483	0	0	0	0	0	0	0	0	0	0	0	0	0	0	0	0	0	0	0	0	0	0	0	0	0	0	0
PB.24627.91	Gtf2f2	Gtf2f2-S-91	ISM	0	0	0	0	0	0	0	0	0	0	1.99726	0	0	2.13636	0	2.27886	0	0	0	0	0	0	0	0	0	0	0	0	0	0	0	0	0	0	0	0	3.11271	0	0	2.95272	0	0	0	0	0	0
PB.73528.101	Cfdp1	Cfdp1-S-101	ISM	1.86468	0	0	0	0	0	0	0	0	0	0	1.80981	3.05164	0	0	0	0	0	1.92483	2.84395	0	0	0	0	0	0	0	0	0	0	0	0	0	0	0	0	0	0	0	0	0	0	0	0	0	0
PB.74313.5	Gm32856	Gm32856-S-5	NNC	0	0	0	0	0	0	0	0	0	0	0	0	0	2.13636	0	0	0	0	0	0	0	0	0	0	0	0	0	0	0	0	0	0	0	0	0	0	0	0	0	0	0	0	0	0	0	0
PB.23639.70	Parp2	Parp2-S-70	NIC	0	0	0	0	0	0	2.09948	0	0	0	0	0	0	0	1.64244	0	0	0	0	0	0	3.43962	0	0	0	0	0	0	0	0	0	0	0	0	0	0	0	0	0	0	0	0	0	0	0	0
PB.45792.23	Gm14401	Gm14401-S-23	FSM	0	0	0	0	0	0	0	0	0	0	0	0	0	0	0	0	0	0	0	0	0	0	0	3.04884	2.74483	0	0	0	0	0	0	0	0	0	0	0	0	0	0	0	0	0	0	0	0	0
PB.54817.165	Gm21411	Gm21411-S-165	FSM	0	0	0	0	0	0	0	0	2.19357	0	1.99726	0	2.04338	0	0	0	0	0	0	0	0	0	0	0	0	0	0	0	0	0	0	0	0	0	0	0	0	0	0	0	0	0	0	0	0	0
PB.25698.2	Zfr	Zfr-S-2	FSM	0	2.04954	2.75031	0	0	1.96174	2.09948	0	0	2.1791	3.27621	2.41757	2.04338	3.82454	1.64244	3.13174	0	2.01354	0	0	0	0	0	0	0	0	0	0	0	0	0	0	0	0	0	0	0	0	0	0	0	0	0	0	0	0
PB.37545.3	Rttn	Rttn-S-3	NNC	2.47719	2.04954	2.75031	0	2.2995	0	2.09948	2.055	2.19357	2.1791	0	1.80981	0	3.15298	0	2.91945	2.52389	2.01354	1.92483	0	2.99065	0	0	3.04884	3.40532	0	0	0	0	0	0	0	0	0	0	0	0	0	0	0	0	0	0	0	0	0
PB.79733.2	Rbmx2	Rbmx2-S-2	ISM	1.86468	0	2.75031	0	2.2995	0	2.09948	0	2.19357	0	0	1.80981	0	2.13636	1.64244	2.91945	2.52389	2.63759	2.54223	2.84395	0	0	0	0	0	0	0	0	0	0	0	0	0	3.24901	0	0	0	0	0	0	0	0	0	0	0	0
PB.9367.24	Os9	Os9-S-24	ISM	0	2.04954	2.75031	0	2.94119	0	0	0	0	0	3.00104	1.80981	2.66954	0	0	2.6496	0	2.01354	0	0	0	0	0	3.04884	0	0	0	0	0	0	0	0	0	0	0	0	0	0	0	0	0	0	0	0	0	0
PB.64165.21	Usp5	Usp5-S-21	ISM	0	0	0	0	0	0	0	0	0	0	0	0	0	0	0	0	0	0	0	0	0	0	0	0	0	0	0	0	0	0	0	0	0	0	3.13018	3.47019	0	0	0	0	0	0	0	0	0	0
PB.4146.13	Tor1aip2	Tor1aip2-S-13	FSM	0	0	0	0	0	0	0	0	0	0	0	0	0	0	0	0	0	0	0	0	0	0	0	0	0	0	0	0	3.94143	0	0	0	0	0	0	0	0	0	0	0	0	0	0	0	0	0
PB.4057.3	E330020D12Rik	E330020D12Rik-S-3	FSM	0	0	0	0	0	0	0	0	0	0	0	0	0	0	0	0	0	0	0	0	0	0	0	0	0	0	0	0	0	0	0	0	0	0	0	0	0	0	0	0	0	0	0	0	0	0
PB.39442.2	Slf2	Slf2-S-2	ISM	0	2.04954	2.11911	0	0	1.96174	0	2.055	0	0	1.99726	2.79287	2.04338	2.13636	1.64244	2.91945	0	0	1.92483	0	0	0	0	0	0	0	0	0	0	0	0	0	0	0	0	0	0	0	0	0	0	0	0	0	0	0
PB.61932.34	Pdia4	Pdia4-S-34	FSM	0	0	0	0	0	0	0	0	0	0	0	0	0	0	1.64244	0	0	0	0	0	0	0	0	0	0	0	0	0	0	0	0	0	0	0	3.13018	0	0	0	0	0	3.88458	0	0	0	0	0
PB.72177.23	Hmgxb4	Hmgxb4-S-23	ISM	0	0	0	0	0	1.96174	0	0	0	0	1.99726	0	0	2.13636	0	2.6496	0	2.01354	0	0	0	0	0	0	0	0	0	0	0	0	0	0	0	0	0	0	0	0	0	0	0	0	0	0	0	0
PB.21241.31	Slf1	Slf1-S-31	ISM	0	0	2.11911	0	0	1.96174	0	2.68196	0	0	1.99726	1.80981	2.66954	3.15298	2.23382	3.69994	1.57395	2.63759	0	0	0	0	0	0	0	0	0	0	0	0	0	0	0	0	0	0	0	0	0	0	0	0	3.6987	0	0	0
PB.66837.7	Zfp936	Zfp936-S-7	FSM	0	0	0	0	0	0	0	0	0	0	2.62014	0	0	0	0	0	0	0	0	0	0	0	0	0	0	0	0	0	0	0	0	0	0	0	3.13018	3.47019	0	2.96822	0	0	4.56739	0	0	0	4.19825	0
PB.49933.475	Nexn	Nexn-S-475	ISM	3.12744	3.55023	2.11911	3.18091	3.82529	3.23659	0	0	0	0	3.49177	3.45491	4.40183	2.13636	3.25834	4.13291	1.57395	4.36789	2.54223	0	0	0	0	0	2.74483	0	0	0	0	0	0	0	0	0	0	0	0	0	0	0	0	0	0	0	0	0
PB.5417.3	Armt1	Armt1-S-3	FSM	0	0	0	0	0	0	0	0	0	0	0	0	0	0	0	0	0	0	0	0	0	0	0	0	0	0	0	0	0	0	0	0	0	0	0	0	0	0	0	0	0	0	0	0	0	0
PB.49779.49	Selenof	Selenof-S-49	ISM	0	2.04954	0	2.16213	0	2.96193	0	2.055	2.82934	0	2.62014	1.80981	2.04338	0	0	0	1.57395	0	1.92483	0	0	3.43962	0	3.04884	0	0	0	2.87225	0	0	0	0	0	0	0	0	0	0	0	0	0	0	0	0	0	0
PB.58431.116	Zfp932	Zfp932-S-116	NNC	0	0	0	0	0	0	0	0	0	0	0	0	0	0	0	0	0	0	0	0	0	0	0	0	0	0	0	0	0	0	0	0	0	0	0	0	0	0	0	0	0	0	0	0	0	0
PB.8458.7	Eea1	Eea1-S-7	ISM	0	2.04954	2.11911	0	0	1.96174	0	0	0	0	1.99726	0	0	2.76866	0	2.27886	1.57395	0	0	0	0	0	0	0	0	0	0	0	0	0	0	0	0	0	0	0	0	0	0	0	0	0	0	0	0	0
PB.18444.27	Eif5	Eif5-S-27	ISM	0	2.04954	2.11911	0	0	0	0	0	0	0	0	0	2.66954	0	1.64244	2.6496	1.57395	0	0	0	0	0	0	0	0	0	0	0	0	0	0	0	0	0	0	0	0	0	0	0	0	0	0	0	0	0
PB.60786.64	Stard13	Stard13-S-64	FSM	1.86468	0	2.11911	0	2.94119	0	0	0	0	0	0	0	2.04338	2.13636	0	0	0	0	0	0	0	0	0	0	0	0	0	0	0	0	0	0	0	0	0	0	0	0	0	0	0	0	0	0	0	0
PB.73226.7	Vps4a	Vps4a-S-7	ISM	0	2.67612	0	0	2.2995	0	2.09948	0	0	0	0	2.41757	2.04338	0	0	1.6832	1.57395	2.01354	0	0	0	0	0	0	0	0	0	0	0	0	0	0	0	0	0	0	0	0	0	0	0	0	0	0	0	0
PB.1820.17	Lancl1	Lancl1-S-17	NNC	0	0	0	0	0	0	0	0	0	0	0	1.80981	2.04338	0	0	2.6496	0	0	0	0	0	4.1166	2.97402	0	0	0	0	3.5367	0	0	0	0	0	0	0	0	0	0	0	0	0	0	0	0	0	0
PB.23556.52	Ktn1	Ktn1-S-52	ISM	0	0	0	0	3.3289	1.96174	0	2.055	0	0	2.62014	2.41757	2.66954	0	2.23382	2.91945	1.57395	3.29432	2.54223	0	0	0	0	0	0	0	0	0	0	0	0	0	0	0	0	0	0	0	0	0	0	0	0	0	0	0
PB.53867.5	Dnajc8	Dnajc8-S-5	ISM	3.66809	3.87847	4.48734	3.18091	3.82529	3.45185	3.11288	0	2.19357	0	4.16958	4.73095	4.85683	4.32659	4.01061	4.57904	2.79133	3.29432	2.54223	0	0	0	2.97402	3.04884	3.40532	0	2.80904	3.93241	0	0	0	0	0	0	0	0	0	0	0	3.61942	0	4.12752	0	0	0	0
PB.41353.23	Rab14	Rab14-S-23	ISM	0	0	2.11911	0	0	0	0	2.055	0	2.1791	0	1.80981	0	0	0	0	2.15772	0	0	0	0	0	0	0	0	0	0	0	0	0	0	0	0	0	0	0	0	0	0	0	0	0	0	0	0	0
PB.44983.12	Top1	Top1-S-12	ISM	1.86468	3.33425	2.75031	0	2.94119	2.58199	0	0	3.49252	2.1791	3.00104	2.41757	3.87154	2.76866	3.40699	3.13174	1.57395	2.63759	3.19524	2.84395	0	0	0	0	2.74483	2.71216	0	0	0	0	0	0	0	0	0	0	0	0	0	0	0	0	0	0	0	0
PB.23218.25	Shld2	Shld2-S-25	FSM	1.86468	0	2.11911	0	0	0	0	0	2.19357	0	0	1.80981	2.04338	2.13636	1.64244	0	0	0	0	0	0	0	0	0	0	0	0	0	0	0	0	0	0	0	0	0	0	0	0	0	0	0	0	0	0	0
PB.14449.6	Prkca	Prkca-S-6	FSM	0	2.67612	0	0	0	0	0	0	0	0	1.99726	0	0	0	0	0	0	0	1.92483	0	0	0	0	0	0	0	0	0	0	0	0	0	3.77792	3.24901	3.13018	0	0	0	0	0	0	0	3.6987	0	0	0
PB.28061.114	Zcrb1	Zcrb1-S-114	ISM	0	0	0	0	0	1.96174	0	0	0	0	0	0	2.66954	2.76866	0	1.6832	0	0	0	0	0	0	0	0	2.74483	0	0	0	0	0	0	0	0	0	0	0	0	0	0	0	0	0	0	0	0	0
PB.58824.1	Cit	Cit-S-1	NIC	0	0	0	0	0	0	0	0	0	0	0	0	0	0	0	0	0	0	0	0	0	0	0	0	0	0	0	0	0	0	0	0	0	0	0	0	0	0	0	0	0	0	0	0	0	0
PB.46849.3	Plk4	Plk4-S-3	FSM	0	2.04954	0	0	2.2995	2.96193	2.09948	0	2.19357	0	2.62014	1.80981	2.04338	3.64657	1.64244	2.6496	1.57395	3.29432	1.92483	0	2.99065	0	2.97402	0	0	0	0	0	0	0	0	0	4.17573	3.24901	3.13018	0	4.18122	0	0	0	0	0	0	0	0	0
PB.63871.101	Bms1	Bms1-S-101	ISM	0	0	0	2.16213	0	0	0	0	0	0	0	1.80981	0	2.13636	1.64244	2.27886	0	0	0	0	0	0	0	0	0	0	0	0	0	0	0	0	0	0	0	0	0	0	0	0	0	0	0	0	0	0
PB.77428.42	Rnf7	Rnf7-S-42	FSM	0	0	0	0	0	0	0	0	0	0	0	1.80981	0	0	0	0	0	0	0	2.84395	0	0	3.64129	0	0	0	0	0	0	0	3.01019	0	3.10739	0	0	3.47019	3.11271	0	0	2.95272	0	4.12752	0	0	0	0
PB.8043.11	1500009L16Rik	1500009L16Rik-S-11	NIC	0	0	0	0	0	0	0	0	0	0	0	0	0	0	0	0	0	0	0	0	0	0	0	0	0	0	0	0	0	0	0	0	0	0	0	0	0	0	0	0	0	0	0	0	0	0
PB.29077.60	Rrn3	Rrn3-S-60	ISM	0	0	0	0	0	0	0	0	0	0	0	0	0	0	0	0	0	0	0	0	0	0	0	0	0	0	0	2.87225	0	0	0	0	0	0	3.13018	0	0	2.96822	0	0	0	0	0	0	0	0
PB.4146.10	Tor1aip2	Tor1aip2-S-10	FSM	0	0	0	0	0	0	0	0	0	0	0	0	0	0	0	0	0	0	0	0	0	0	0	0	0	0	0	0	0	0	0	0	0	0	3.80123	0	0	0	0	0	0	0	0	0	0	0
PB.63704.33	Irak2	Irak2-S-33	FSM	0	0	0	0	0	0	0	0	0	0	0	0	0	0	0	0	0	0	0	0	0	0	0	0	0	0	0	0	0	4.4043	0	0	0	0	0	0	0	0	0	0	0	0	0	0	0	0
PB.74767.150	Dnmt1	Dnmt1-S-150	ISM	2.47719	2.04954	0	0	0	1.96174	0	0	0	0	1.99726	2.41757	3.54337	3.15298	2.60293	1.6832	0	0	0	0	0	0	0	0	2.74483	2.71216	0	0	0	0	0	0	0	0	0	0	0	0	0	0	0	0	0	0	0	0
PB.35918.28	Matr3	Matr3-S-28	ISM	0	2.04954	0	0	0	0	0	0	0	0	1.99726	1.80981	2.66954	0	1.64244	1.6832	0	0	0	0	0	0	0	0	0	0	0	0	0	0	0	0	0	0	0	0	0	0	0	0	0	0	0	0	0	0
PB.21680.39	Nsa2	Nsa2-S-39	FSM	0	2.04954	2.11911	2.16213	0	0	0	0	0	0	0	0	0	2.13636	0	1.6832	0	2.01354	0	0	0	0	0	0	0	0	0	0	0	0	0	0	0	0	0	0	0	0	0	0	0	0	0	0	0	0
PB.33938.10	Rpl36	Rpl36-S-10	ISM	0	0	0	0	0	0	0	0	0	0	0	0	0	0	0	0	0	0	0	0	0	0	0	0	0	0	0	0	0	0	0	0	0	0	3.13018	0	0	0	0	0	0	0	0	0	0	0
PB.9120.27	Llph	Llph-S-27	FSM	1.86468	2.04954	2.11911	2.79601	2.94119	0	0	0	0	0	2.62014	0	2.04338	2.13636	1.64244	1.6832	0	0	0	0	0	0	0	0	0	0	0	0	0	0	0	0	0	0	0	0	0	0	0	0	0	0	0	0	0	0
PB.73045.83	D230025D16Rik	D230025D16Rik-S-83	ISM	0	0	2.11911	0	0	0	0	0	0	0	0	0	0	0	0	0	0	0	0	0	0	0	0	0	0	0	0	0	0	0	3.01019	0	0	0	3.13018	3.47019	0	0	0	0	0	0	0	0	0	0
PB.57752.73	Nup54	Nup54-S-73	ISM	2.47719	2.04954	2.11911	0	2.94119	0	2.09948	2.055	2.82934	0	1.99726	2.79287	2.66954	3.42993	0	2.6496	0	0	0	0	0	0	0	0	0	0	0	2.87225	0	0	0	0	0	0	0	0	0	0	0	0	0	0	0	0	0	0
PB.46136.232	Tpd52	Tpd52-S-232	ISM	1.86468	2.04954	0	0	0	0	2.09948	0	0	0	0	0	2.66954	0	1.64244	1.6832	1.57395	0	0	0	0	0	0	0	0	0	0	0	0	0	0	0	0	0	0	0	0	0	0	0	0	0	0	0	0	0
PB.66817.28	Zfp977	Zfp977-S-28	FSM	1.86468	0	0	0	0	0	0	0	0	0	0	0	0	0	0	0	1.57395	0	0	0	0	0	0	0	0	0	0	0	0	0	0	0	3.10739	0	0	0	0	0	0	0	0	0	0	0	0	0
PB.7522.23	Vpreb3	Vpreb3-S-23	NNC	0	0	0	0	0	0	0	0	0	0	0	0	0	0	0	0	0	0	0	0	0	0	0	0	0	0	0	0	0	0	0	0	0	0	0	0	0	0	3.11123	0	0	0	0	0	0	0
PB.71752.573	Trim61	Trim61-S-573	FSM	0	0	0	0	0	0	0	0	0	0	1.99726	0	2.04338	0	0	0	0	0	1.92483	0	0	0	0	0	2.74483	0	0	2.87225	0	0	0	0	0	0	0	0	0	0	0	0	0	0	0	0	0	0
PB.58349.115	Mtf2	Mtf2-S-115	ISM	0	2.04954	2.11911	0	0	0	0	2.055	0	0	0	0	2.04338	0	0	1.6832	0	2.01354	0	0	0	0	0	0	0	0	0	0	0	0	0	0	0	0	0	0	0	0	0	0	0	0	0	0	0	0
PB.52008.171	Psip1	Psip1-S-171	ISM	1.86468	0	0	0	0	1.96174	0	2.055	0	0	2.62014	2.41757	3.05164	3.15298	1.64244	0	0	0	0	0	0	0	0	0	0	0	0	0	0	0	0	0	0	0	0	0	0	0	0	0	0	0	0	0	0	0
PB.31900.100	Zfp960	Zfp960-S-100	FSM	0	0	2.75031	0	0	1.96174	0	0	0	0	0	0	0	0	0	1.6832	0	0	1.92483	0	0	0	0	0	0	0	0	0	0	0	0	0	0	0	0	0	0	0	0	0	0	0	0	0	0	0
PB.71993.55	Haus8	Haus8-S-55	ISM	2.85426	2.67612	3.41098	0	2.94119	0	2.09948	0	0	0	3.27621	2.79287	2.66954	3.42993	0	3.13174	1.57395	0	1.92483	0	0	0	0	0	0	0	0	0	0	0	0	0	0	0	0	0	0	0	0	0	0	0	0	0	0	0
PB.64989.56	Prpf31	Prpf31-S-56	ISM	0	0	0	0	0	0	0	0	0	0	0	0	0	0	0	0	1.57395	0	0	0	0	0	0	0	0	2.71216	0	0	0	0	0	0	0	0	0	0	0	0	0	0	0	0	0	0	4.19825	0
PB.62157.17	Tax1bp1	Tax1bp1-S-17	FSM	1.86468	2.04954	2.75031	0	2.2995	0	2.09948	0	0	0	0	2.79287	0	0	0	2.27886	0	0	0	0	0	0	0	0	0	0	0	0	0	0	0	0	0	0	0	0	0	0	0	0	0	0	0	0	0	0
PB.9462.165	Timeless	Timeless-S-165	NNC	1.86468	0	0	0	0	0	0	0	0	0	0	0	2.04338	2.13636	0	2.27886	0	2.63759	2.54223	0	0	0	0	0	0	0	0	0	0	0	0	0	0	0	0	0	0	0	0	0	0	0	0	0	0	0
PB.13345.76	Luc7l3	Luc7l3-S-76	ISM	3.34178	2.67612	2.75031	0	2.94119	1.96174	2.09948	2.055	0	0	1.99726	0	3.72086	3.15298	2.87192	3.80283	2.15772	2.63759	1.92483	0	0	0	0	0	0	0	0	0	0	0	0	0	0	0	0	0	0	0	0	0	0	0	0	0	0	0
PB.70896.22	Brf2	Brf2-S-22	ISM	0	0	0	0	0	0	0	0	0	0	0	1.80981	0	0	1.64244	0	0	0	0	0	0	0	0	0	0	0	0	0	0	0	0	0	0	0	0	0	0	0	0	0	0	0	0	0	0	0
PB.66186.75	Psmc4	Psmc4-S-75	ISM	0	0	0	0	0	0	0	0	0	0	0	0	0	0	0	0	0	0	0	0	0	0	0	0	0	0	0	0	0	0	0	0	0	3.24901	0	0	0	0	0	0	0	0	0	0	0	0
PB.52008.164	Psip1	Psip1-S-164	ISM	0	2.04954	0	0	0	0	0	0	0	0	1.99726	0	2.04338	2.76866	0	1.6832	0	2.63759	2.54223	0	0	0	0	0	0	0	0	0	0	0	0	0	0	0	0	0	0	0	0	0	0	0	0	0	0	0
PB.2712.103	Hdlbp	Hdlbp-S-103	ISM	1.86468	2.67612	2.11911	2.79601	0	0	2.72941	2.055	0	0	3.00104	2.79287	2.04338	2.13636	1.64244	3.13174	0	0	0	0	0	0	0	0	0	0	0	0	0	0	0	0	0	0	0	0	0	0	0	0	0	0	0	0	0	0
PB.2087.6	Stk16	Stk16-S-6	FSM	0	0	0	0	0	0	0	0	0	0	0	0	0	0	0	0	0	0	0	0	0	0	0	0	0	0	0	0	0	0	3.67839	0	3.10739	0	3.13018	3.47019	0	0	0	0	0	0	0	0	0	0
PB.50978.91	Ubap2	Ubap2-S-91	ISM	3.91372	3.33425	3.41098	3.67498	2.2995	1.96174	3.11288	2.68196	0	0	4.69382	3.95302	3.87154	3.97556	2.87192	3.98142	2.52389	3.83791	0	0	0	0	0	0	2.74483	0	0	0	0	0	0	0	3.10739	0	0	0	0	0	0	0	0	0	0	0	0	0
PB.63068.90	D6Ertd527e	D6Ertd527e-S-90	FSM	0	0	0	0	2.2995	0	0	0	0	0	0	3.06512	0	3.15298	1.64244	1.6832	1.57395	0	0	0	0	0	0	3.04884	0	0	0	0	0	0	0	0	0	0	0	0	0	0	0	0	0	0	0	0	0	0
PB.2446.12	Gigyf2	Gigyf2-S-12	ISM	0	2.04954	2.11911	0	0	0	0	0	0	0	0	1.80981	0	0	0	2.91945	0	2.01354	0	0	0	0	0	0	0	0	0	0	0	0	0	0	0	0	0	0	0	0	0	0	0	0	0	0	0	0
PB.43383.3	Nusap1	Nusap1-S-3	ISM	1.86468	0	2.11911	2.16213	3.3289	1.96174	0	0	0	0	3.49177	3.27889	0	2.13636	0	1.6832	0	0	0	0	0	0	0	0	0	0	0	0	0	0	0	0	0	0	0	0	0	0	0	0	0	0	0	0	0	0
PB.10998.31	Rnf130	Rnf130-S-31	ISM	2.85426	0	0	0	2.2995	0	0	0	0	0	0	0	0	0	0	0	0	0	0	0	0	0	0	0	0	0	0	0	0	0	0	0	0	0	0	0	0	0	0	0	0	0	0	0	0	0
PB.77495.6	Nmnat3	Nmnat3-S-6	NNC	0	0	2.11911	2.16213	2.2995	0	2.72941	0	0	0	1.99726	0	0	0	0	2.27886	0	0	0	0	2.99065	0	0	0	2.74483	0	0	2.87225	0	0	0	0	0	0	0	0	0	0	0	0	0	0	0	0	0	0
PB.53494.3	Clspn	Clspn-S-3	FSM	1.86468	2.04954	0	0	2.2995	0	0	2.055	0	0	0	0	3.05164	0	1.64244	2.27886	0	2.01354	0	0	0	0	0	0	0	0	0	0	0	0	0	0	0	0	0	0	0	0	0	0	0	0	0	0	0	0
PB.19746.12	Riok1	Riok1-S-12	ISM	0	2.67612	0	0	0	0	2.09948	0	0	0	0	0	2.66954	0	0	1.6832	0	0	0	0	0	0	0	0	2.74483	0	0	0	0	0	0	0	0	0	0	0	0	0	0	0	0	0	0	0	0	0
PB.38017.122	Mark2	Mark2-S-122	ISM	0	0	0	2.79601	0	0	0	0	0	0	0	0	2.04338	0	2.60293	2.27886	0	0	1.92483	0	0	0	2.97402	0	0	0	0	0	0	0	0	0	0	0	0	0	0	0	0	0	0	0	0	0	0	0
PB.11059.5	Clk4	Clk4-S-5	FSM	0	0	0	2.16213	0	1.96174	0	0	2.19357	0	0	0	0	2.76866	2.23382	0	0	0	0	0	0	0	0	0	0	0	0	0	0	0	0	0	0	0	0	0	0	0	0	0	0	0	0	0	0	0
PB.41137.21	Nup214	Nup214-S-21	NNC	0	0	0	0	0	0	0	0	0	0	1.99726	1.80981	2.04338	0	3.08368	1.6832	0	0	0	0	0	3.43962	0	3.04884	3.40532	0	0	3.93241	0	0	0	0	0	0	0	0	0	0	0	0	0	0	0	0	0	0
PB.54772.76	Gm13212	Gm13212-S-76	NNC	0	0	0	0	0	0	0	0	0	0	0	0	0	0	0	1.6832	0	0	0	0	0	0	0	0	0	0	0	0	0	0	0	0	0	0	0	0	0	0	0	0	0	0	0	0	0	0
PB.37043.7	Mbd2	Mbd2-S-7	ISM	1.86468	2.04954	2.11911	0	0	0	0	2.055	0	0	2.62014	0	0	0	1.64244	0	0	2.63759	1.92483	0	0	0	2.97402	0	0	3.37154	0	0	0	0	0	0	0	0	3.13018	0	0	0	0	0	0	0	0	0	0	0
PB.49268.15	Bcar3	Bcar3-S-15	ISM	1.86468	0	0	0	2.2995	0	0	0	0	0	0	1.80981	2.04338	2.13636	0	2.27886	0	0	0	0	0	0	0	0	0	0	2.80904	0	0	0	0	0	0	0	0	0	0	0	0	0	0	0	0	0	0	0
PB.5210.12	Angel2	Angel2-S-12	ISM	1.86468	0	2.11911	0	0	0	0	0	0	0	0	0	2.04338	0	0	0	0	0	0	0	0	0	0	0	0	2.71216	0	2.87225	0	0	0	0	0	0	0	0	0	0	0	0	0	0	0	0	0	0
PB.10170.29	Etaa1	Etaa1-S-29	ISM	0	0	0	0	2.94119	2.58199	0	2.055	0	0	3.27621	3.06512	3.32743	2.76866	0	2.27886	2.15772	3.96874	2.54223	0	0	0	0	3.04884	0	0	0	0	0	0	0	0	0	0	0	0	0	0	0	0	0	0	0	0	0	0
PB.77182.170	Me1	Me1-S-170	FSM	0	0	2.11911	0	0	0	0	0	0	0	0	1.80981	2.04338	0	0	0	0	0	0	0	0	0	0	3.04884	0	2.71216	0	0	0	0	0	0	0	0	0	0	0	0	0	0	0	0	0	0	0	0
PB.26312.21	Atp6v1c1	Atp6v1c1-S-21	ISM	1.86468	2.04954	2.11911	0	0	0	0	0	0	0	0	2.41757	0	3.15298	0	3.30676	0	0	0	0	0	0	0	0	0	0	0	0	0	0	0	0	0	0	0	0	0	0	0	0	0	0	0	0	0	0
PB.2368.94	Psmd1	Psmd1-S-94	ISM	1.86468	2.04954	0	0	0	0	0	0	2.19357	0	0	0	2.04338	2.13636	0	1.6832	0	2.63759	1.92483	0	0	0	0	0	0	0	0	0	0	0	0	0	0	0	0	0	0	0	0	0	0	0	0	0	0	0
PB.77998.149	Usp19	Usp19-S-149	NIC	3.12744	3.33425	3.41098	2.79601	4.00396	2.96193	3.11288	0	2.82934	2.81401	3.27621	3.27889	0	2.13636	2.60293	3.13174	2.52389	2.63759	0	0	0	0	2.97402	0	2.74483	2.71216	3.4716	3.93241	3.94143	0	0	0	0	3.24901	0	0	0	0	0	0	0	0	0	0	0	0
PB.58876.9	Taok3	Taok3-S-9	NIC	0	2.04954	2.11911	0	0	1.96174	0	0	0	0	0	0	0	0	0	2.6496	0	0	1.92483	0	0	0	0	0	0	0	0	0	0	0	0	0	0	0	0	0	0	0	0	0	0	0	0	0	0	0
PB.4146.11	Tor1aip2	Tor1aip2-S-11	FSM	0	0	0	0	0	0	0	0	0	0	0	0	0	0	0	0	0	0	0	0	0	0	0	0	0	0	0	0	0	0	0	0	0	0	0	0	0	0	0	0	0	0	0	0	0	0
PB.50277.26	Ccne2	Ccne2-S-26	ISM	0	0	0	0	2.94119	0	0	0	2.82934	0	1.99726	1.80981	0	0	2.23382	2.6496	0	2.01354	0	0	0	0	0	0	2.74483	0	0	0	0	0	0	0	0	0	0	0	0	0	0	0	0	0	0	0	0	0
PB.58431.44	Gm15446	Gm15446-S-44	NNC	0	0	0	0	0	0	0	0	0	0	0	0	0	0	0	0	0	0	0	0	0	0	0	0	0	0	0	0	0	0	0	0	0	0	0	0	0	0	0	0	0	0	0	0	0	0
PB.39988.19	Zfp950	Zfp950-S-19	FSM	0	0	0	0	0	0	0	0	0	0	0	0	0	0	1.64244	0	0	0	0	0	0	0	0	0	0	0	0	0	0	0	0	0	0	0	0	0	0	0	0	0	0	0	0	0	0	0
PB.57729.360	G3bp2	G3bp2-S-360	FSM	0	2.67612	3.13424	3.18091	2.2995	0	0	3.06435	2.19357	2.1791	2.62014	3.60454	2.66954	3.15298	3.40699	3.45567	2.52389	2.63759	2.54223	0	0	0	0	0	0	0	0	0	0	0	0	0	0	0	0	0	0	0	0	0	0	0	0	0	0	0
PB.72320.58	Usp38	Usp38-S-58	ISM	0	0	0	0	0	2.58199	0	0	0	0	0	0	2.04338	2.13636	3.25834	1.6832	0	0	0	0	2.99065	3.43962	0	3.04884	0	0	0	2.87225	0	0	3.01019	3.31925	3.10739	3.24901	0	0	0	0	0	0	0	0	3.6987	0	0	0
PB.76244.399	Kif23	Kif23-S-399	FSM	2.47719	3.05837	2.11911	2.16213	3.3289	2.58199	0	2.055	0	0	3.00104	3.27889	3.32743	3.82454	2.87192	4.13291	0	2.63759	1.92483	0	0	0	0	0	0	0	0	0	0	0	0	0	0	0	0	0	0	0	0	0	0	0	0	0	0	0
PB.36893.39	Lman1	Lman1-S-39	ISM	2.47719	0	0	2.16213	0	0	0	0	0	0	2.62014	1.80981	2.04338	2.13636	0	1.6832	0	2.01354	0	0	0	0	0	0	0	0	0	0	0	0	0	0	0	0	0	0	0	0	0	0	0	0	0	0	0	0
PB.53125.18	Ccdc30	Ccdc30-S-18	FSM	0	0	0	0	0	0	0	0	0	0	0	0	0	0	0	0	0	0	0	0	0	0	0	0	0	0	0	0	0	0	0	0	3.77792	3.24901	0	4.14766	0	2.96822	0	3.61942	0	4.81257	0	0	0	0
PB.53451.75	Thrap3	Thrap3-S-75	NIC	0	0	2.11911	0	2.2995	0	0	0	0	0	0	0	2.04338	0	0	2.6496	0	0	1.92483	0	0	0	0	0	0	0	0	0	0	0	0	0	0	0	0	0	0	0	0	0	0	0	0	0	0	0
PB.24289.32	Fzd3	Fzd3-S-32	ISM	0	2.04954	0	2.16213	0	0	0	0	0	0	0	0	0	0	0	0	0	0	0	0	0	0	0	0	0	2.71216	0	0	0	0	0	0	0	0	0	0	0	0	0	2.95272	0	0	0	0	0	0
PB.72554.125	Dnaja2	Dnaja2-S-125	ISM	1.86468	0	0	0	2.2995	1.96174	0	0	2.19357	0	0	2.41757	3.05164	2.13636	1.64244	1.6832	0	2.01354	0	0	0	0	0	0	0	0	0	0	0	0	0	0	0	0	0	0	0	0	0	0	0	0	0	0	0	0
PB.59889.59	Rasa4	Rasa4-S-59	FSM	0	0	0	0	0	1.96174	0	0	0	0	0	0	0	0	0	1.6832	2.15772	0	0	0	2.99065	0	0	0	0	0	2.80904	3.5367	3.94143	0	0	0	0	0	0	0	0	0	0	0	0	0	0	0	0	0
PB.65419.30	Obox2	Obox2-S-30	ISM	2.47719	2.04954	2.11911	0	2.2995	0	0	0	0	0	1.99726	2.41757	2.66954	0	3.08368	3.13174	1.57395	0	0	0	0	0	0	0	2.74483	0	0	0	0	0	0	0	0	0	0	0	0	0	0	0	0	0	0	0	0	0
PB.21656.8	Gcnt4	Gcnt4-S-8	NNC	0	0	0	0	0	0	0	0	0	0	1.99726	0	0	0	2.87192	1.6832	0	0	0	0	2.99065	0	0	0	2.74483	2.71216	2.80904	0	3.94143	0	0	0	0	0	0	0	0	0	0	0	0	0	0	0	0	0
PB.48305.188	Psmd4	Psmd4-S-188	ISM	1.86468	2.04954	0	0	2.94119	1.96174	0	0	0	0	2.62014	0	2.04338	2.13636	0	1.6832	0	2.01354	0	0	0	0	0	0	0	0	0	0	0	0	0	0	0	0	0	0	0	0	0	0	0	0	0	0	0	0
PB.43893.16	Nop56	Nop56-S-16	ISM	0	3.05837	2.75031	2.16213	3.3289	2.96193	0	2.68196	0	0	3.49177	2.79287	3.05164	2.76866	3.53637	3.69994	1.57395	2.63759	3.58696	0	0	0	0	0	0	0	0	0	0	0	0	0	0	0	0	0	0	0	0	0	0	0	0	0	0	0
PB.56420.488	Slbp	Slbp-S-488	FSM	1.86468	0	0	0	0	0	0	0	0	0	2.62014	1.80981	2.66954	2.76866	3.25834	0	0	0	0	0	0	0	0	0	3.79966	2.71216	0	2.87225	0	0	0	0	0	3.24901	0	0	0	0	0	0	0	0	0	0	0	0
PB.76244.403	Kif23	Kif23-S-403	ISM	1.86468	2.04954	0	2.16213	0	1.96174	0	2.055	0	0	1.99726	2.79287	2.04338	2.76866	2.23382	3.58524	1.57395	0	0	0	0	0	0	0	0	0	0	0	0	0	0	0	0	0	0	0	0	0	0	0	0	0	0	0	0	0
PB.13662.30	Cwc25	Cwc25-S-30	FSM	1.86468	0	0	0	0	0	0	0	0	0	0	0	2.04338	0	2.23382	2.27886	0	0	1.92483	0	0	0	0	0	0	0	0	0	0	0	0	0	0	0	0	0	0	0	0	0	0	0	0	0	0	0
PB.56754.1	Ncapg	Ncapg-S-1	ISM	2.47719	0	2.11911	0	2.2995	0	0	0	3.21493	0	0	3.27889	3.05164	3.42993	3.08368	4.06003	1.57395	2.63759	1.92483	0	0	0	0	0	0	0	0	0	0	0	0	0	0	0	0	0	0	0	0	0	0	0	0	0	0	0
PB.30328.1	Ccdc191	Ccdc191-S-1	ISM	0	2.04954	0	0	0	0	2.09948	0	2.19357	0	1.99726	0	2.04338	0	1.64244	1.6832	0	2.01354	0	0	0	0	0	0	0	0	0	0	0	0	0	0	0	0	0	0	0	0	0	0	0	0	0	0	0	0
PB.18141.10	Tcl1	Tcl1-S-10	FSM	6.24157	6.17642	6.29703	5.99361	6.2388	5.59811	6.48117	6.46278	5.96971	6.29498	5.8616	5.79299	5.77889	5.77502	5.77429	5.72943	6.48493	6.32636	6.16368	5.73168	5.83239	4.80156	5.49065	5.203	5.39103	6.11141	5.6947	5.95211	5.71688	4.4043	0	0	3.10739	3.24901	4.70402	4.54785	3.78336	0	3.78185	2.95272	4.56739	4.12752	4.3794	4.56999	0	0
PB.11272.55	Gpx3	Gpx3-S-55	ISM	2.85426	3.87847	2.75031	2.79601	2.94119	2.96193	3.60575	3.34029	4.2864	3.87183	2.62014	2.79287	2.04338	2.13636	1.64244	1.6832	3.17614	3.29432	3.73715	0	0	0	2.97402	0	0	2.71216	0	2.87225	0	0	0	0	0	3.24901	4.19922	0	3.11271	2.96822	3.11123	4.01592	0	4.12752	0	0	0	0
PB.43542.81	Mfap1b	Mfap1b-S-81	ISM	1.86468	0	0	0	0	1.96174	0	0	0	0	0	3.06512	3.54337	3.64657	3.08368	3.30676	0	2.63759	1.92483	0	0	0	0	0	0	0	0	0	0	0	0	0	0	0	0	0	0	0	0	0	0	0	0	0	0	0
PB.958.10	Eif5b	Eif5b-S-10	ISM	4.34839	5.0094	4.48734	4.00418	4.90925	4.22287	2.72941	3.06435	3.70956	2.1791	5.07655	4.63653	5.95025	4.65928	4.90058	5.09475	4.19021	5.70221	5.1403	0	0	0	0	0	2.74483	0	0	0	0	4.4043	0	0	0	0	3.13018	0	3.78336	0	0	3.61942	0	0	0	0	0	0
PB.16984.3	Pcnx4	Pcnx4-S-3	ISM	0	0	0	0	0	0	0	2.055	0	0	0	0	0	0	0	0	0	0	0	0	0	0	0	0	0	0	0	0	0	0	0	3.31925	0	0	3.80123	0	3.11271	2.96822	3.78185	3.61942	0	0	0	0	0	0
PB.26711.51	Nsmce2	Nsmce2-S-51	NNC	0	0	0	0	0	2.96193	0	0	0	0	2.62014	1.80981	3.05164	3.42993	3.40699	2.27886	0	0	0	0	0	0	0	3.71799	0	0	0	3.93241	0	0	0	0	0	0	0	0	0	0	0	0	0	0	0	0	0	0
PB.37988.248	Stip1	Stip1-S-248	ISM	0	0	2.11911	2.16213	2.94119	0	2.09948	0	0	0	0	1.80981	2.04338	0	1.64244	0	0	0	0	0	0	0	0	0	2.74483	0	0	0	0	0	0	0	0	0	0	0	0	0	0	0	0	0	0	0	0	0
PB.29858.57	Pak2	Pak2-S-57	ISM	0	0	0	0	0	0	0	0	0	0	0	0	2.04338	0	0	0	0	0	0	0	0	0	0	0	0	0	0	0	0	0	0	0	0	0	3.80123	0	3.11271	0	3.11123	0	0	0	0	0	0	0
PB.12216.3	Zfp616	Zfp616-S-3	FSM	0	2.67612	2.11911	2.16213	0	0	0	0	0	0	0	0	2.04338	2.76866	0	2.91945	1.57395	0	0	0	0	0	0	0	0	0	0	0	0	0	0	0	0	0	0	0	0	0	0	0	0	0	0	0	0	0
PB.28061.93	Zcrb1	Zcrb1-S-93	ISM	1.86468	0	2.75031	0	0	0	0	0	0	0	2.62014	0	0	2.13636	0	0	0	0	1.92483	0	0	0	0	0	0	0	0	0	0	0	0	0	0	0	0	0	0	0	0	0	0	0	0	0	0	0
PB.13345.68	Luc7l3	Luc7l3-S-68	NNC	0	0	2.11911	0	2.2995	0	0	2.055	0	0	0	0	2.04338	0	1.64244	0	0	0	0	0	0	0	0	0	0	0	0	0	0	0	0	0	0	0	0	0	0	0	0	0	0	0	0	0	0	0
PB.66629.53	Tdrd12	Tdrd12-S-53	ISM	1.86468	2.04954	0	2.16213	2.94119	2.58199	0	2.055	0	0	2.62014	3.27889	3.87154	2.76866	2.87192	3.98142	0	2.63759	0	0	0	0	2.97402	0	2.74483	2.71216	0	0	0	0	0	0	0	0	0	0	0	0	0	0	0	0	0	0	0	0
PB.50532.2	Pnisr	Pnisr-S-2	ISM	0	3.05837	3.13424	0	2.2995	2.58199	2.09948	0	2.19357	0	1.99726	2.79287	3.72086	3.82454	2.23382	3.98142	2.15772	0	0	0	0	0	0	0	0	0	0	0	0	0	0	0	0	0	0	0	0	0	0	0	0	0	0	0	0	0
PB.11283.398	Ccdc69	Ccdc69-S-398	ISM	2.85426	3.55023	3.6275	3.18091	3.82529	1.96174	0	2.055	0	0	3.27621	3.06512	3.05164	3.42993	2.87192	2.91945	2.79133	2.63759	0	0	0	0	0	0	0	0	0	0	0	0	0	0	0	0	0	0	0	0	0	0	0	0	0	0	0	0
PB.50951.2	Chmp5	Chmp5-S-2	ISM	3.12744	2.04954	2.11911	0	0	0	0	2.055	0	0	1.99726	1.80981	0	2.13636	0	2.27886	0	2.63759	0	0	0	0	0	0	0	0	0	0	0	0	0	0	0	0	0	0	0	0	0	0	0	0	0	0	0	0
PB.14305.65	Ftsj3	Ftsj3-S-65	ISM	0	2.04954	0	0	0	0	0	0	0	0	1.99726	1.80981	2.04338	0	0	2.6496	0	2.01354	0	0	0	0	0	0	0	0	0	0	0	0	0	0	0	0	0	0	0	0	0	0	0	0	0	0	0	0
PB.27279.39	Triobp	Triobp-S-39	ISM	0	2.67612	2.75031	2.79601	0	1.96174	0	2.055	2.19357	2.1791	0	1.80981	0	2.76866	0	2.27886	0	0	0	0	2.99065	3.43962	2.97402	0	2.74483	0	2.80904	3.5367	0	0	0	0	3.10739	0	0	0	0	0	3.11123	0	0	0	3.6987	0	0	0
PB.13898.5	Atp6v0a1	Atp6v0a1-S-5	FSM	0	0	0	0	0	0	0	0	0	0	0	0	0	0	0	0	0	0	0	0	0	0	0	0	0	0	0	0	0	0	0	0	0	0	0	0	0	0	0	0	0	4.12752	0	0	0	0
PB.6377.52	Rpf2	Rpf2-S-52	FSM	1.86468	2.04954	2.11911	0	2.2995	0	0	0	0	0	0	1.80981	2.04338	0	0	2.27886	0	0	1.92483	0	0	0	0	0	0	0	0	0	0	0	0	0	0	0	0	0	0	0	0	3.61942	0	4.12752	0	0	0	0
PB.11272.53	Gpx3	Gpx3-S-53	ISM	0	0	2.11911	2.16213	0	0	2.09948	2.68196	0	0	0	0	0	0	1.64244	0	0	2.01354	0	0	0	0	0	0	0	0	0	0	0	0	0	0	0	0	0	0	0	2.96822	0	2.95272	0	4.12752	0	0	0	0
PB.68322.34	Uvrag	Uvrag-S-34	NNC	0	0	0	2.16213	0	1.96174	3.11288	0	0	0	0	0	0	0	1.64244	1.6832	0	0	0	0	2.99065	0	0	0	0	0	0	0	3.94143	0	0	0	0	0	0	0	0	0	0	0	0	0	0	0	0	0
PB.39642.116	Sfr1	Sfr1-S-116	NIC	1.86468	2.04954	2.75031	0	2.2995	1.96174	0	0	0	0	2.62014	1.80981	3.54337	3.15298	2.23382	3.58524	0	0	0	0	0	0	0	0	0	0	0	0	0	0	0	0	0	0	0	0	0	0	0	0	0	0	0	0	0	0
PB.54823.511	Zfp982	Zfp982-S-511	FSM	0	0	0	0	0	0	0	0	0	0	0	0	0	0	0	1.6832	0	0	0	0	0	0	2.97402	0	0	0	2.80904	0	0	0	0	3.31925	0	0	0	0	0	0	0	0	0	0	0	0	0	0
PB.62865.11	Stambp	Stambp-S-11	ISM	1.86468	2.67612	2.11911	0	2.94119	0	0	2.055	0	0	1.99726	0	0	2.76866	1.64244	2.6496	0	0	0	0	0	0	0	0	2.74483	0	0	0	0	0	0	0	0	0	0	0	0	0	0	0	0	0	0	0	0	0
PB.31900.98	Zfp960	Zfp960-S-98	FSM	0	0	0	0	0	0	0	0	0	0	0	1.80981	0	0	0	0	0	0	0	0	0	0	0	0	0	0	0	0	0	0	0	0	0	0	0	0	0	0	0	0	0	0	0	0	0	0
PB.18046.2	Golga5	Golga5-S-2	ISM	1.86468	2.04954	2.75031	0	0	1.96174	2.09948	0	0	0	0	2.41757	2.66954	0	0	2.27886	0	2.63759	0	0	0	0	0	0	0	0	0	0	0	0	0	0	0	0	0	0	0	0	0	0	0	0	0	0	0	0
PB.17780.306	Gm10436	Gm10436-S-306	FSM	0	0	0	0	0	0	0	0	0	0	1.99726	0	2.04338	2.13636	2.60293	2.27886	0	0	0	0	2.99065	0	0	3.71799	3.40532	3.37154	3.86665	0	0	0	0	0	0	0	0	0	0	0	0	0	0	0	0	0	0	0
PB.11059.7	Clk4	Clk4-S-7	NIC	0	2.04954	0	0	0	0	0	0	0	0	1.99726	0	0	0	1.64244	0	1.57395	0	0	0	2.99065	0	0	0	0	0	0	0	0	0	0	0	0	0	0	0	0	0	0	0	0	0	0	0	0	0
PB.45792.3	Gm14419	Gm14419-S-3	NIC	0	0	0	0	0	0	0	0	0	0	0	0	0	0	0	0	0	0	0	0	0	0	0	0	0	0	0	0	0	0	0	0	0	0	0	0	0	0	0	0	0	0	0	0	0	0
PB.72362.5	Dnajb1	Dnajb1-S-5	ISM	0	2.04954	3.13424	0	2.94119	0	0	0	0	0	1.99726	2.41757	2.04338	2.13636	0	0	0	0	1.92483	0	0	0	0	0	2.74483	0	0	0	0	0	0	0	0	0	0	0	0	0	0	0	0	0	0	0	0	0
PB.62458.1	4930597O21Rik	4930597O21Rik-S-1	FSM	1.86468	0	0	0	0	0	2.09948	0	0	0	0	1.80981	2.04338	2.13636	2.60293	0	0	2.01354	1.92483	0	0	3.43962	0	0	0	0	0	0	0	0	0	0	0	0	0	0	0	0	0	0	0	0	0	0	0	0
PB.74348.2	Kbtbd3	Kbtbd3-S-2	FSM	0	0	0	0	2.2995	0	0	0	0	0	0	0	0	0	0	0	0	0	0	0	0	0	0	0	0	0	0	0	0	0	0	0	0	0	3.13018	0	0	0	3.11123	0	0	0	0	0	0	0
PB.81745.4	Smc1a	Smc1a-S-4	ISM	0	2.04954	0	0	0	0	0	0	0	0	0	1.80981	0	0	2.23382	1.6832	0	2.01354	0	0	0	0	0	0	0	0	0	0	0	0	0	0	0	0	0	0	0	0	0	0	0	0	0	0	0	0
PB.12165.10	Ube2g1	Ube2g1-S-10	ISM	0	0	0	0	2.2995	0	2.09948	0	0	0	0	0	2.04338	0	2.23382	1.6832	0	0	0	0	0	0	0	0	0	0	0	0	0	0	0	0	0	0	0	0	0	0	0	0	0	0	0	0	0	0
PB.70709.4	Plat	Plat-S-4	ISM	1.86468	0	0	0	0	0	0	0	2.19357	0	0	0	0	0	0	2.27886	0	0	0	0	0	0	0	0	0	3.37154	0	0	3.94143	0	0	0	0	0	0	0	0	0	0	0	0	0	0	0	0	0
PB.46528.2	Pld1	Pld1-S-2	FSM	0	2.67612	0	0	0	0	0	0	0	0	0	2.41757	0	2.13636	0	2.6496	0	2.01354	0	0	0	0	0	0	0	0	0	0	0	0	0	0	0	0	0	0	0	0	0	0	0	0	0	0	0	0
PB.27422.38	Atf4	Atf4-S-38	ISM	0	0	0	0	0	0	0	0	0	0	0	0	0	0	0	0	0	0	0	0	0	0	0	0	0	0	0	0	0	4.4043	0	0	0	0	0	0	0	0	3.11123	2.95272	0	0	3.6987	0	0	0
PB.56178.28	Hadha	Hadha-S-28	FSM	0	0	2.11911	0	2.94119	0	0	0	0	0	0	0	3.05164	0	1.64244	2.91945	0	0	0	0	0	0	0	0	0	0	0	0	0	0	0	0	0	0	0	0	0	0	0	0	0	0	0	0	0	0
PB.50924.46	Dnaja1	Dnaja1-S-46	ISM	1.86468	3.05837	2.11911	2.79601	0	0	0	0	0	2.1791	2.62014	2.79287	2.66954	0	0	2.91945	0	0	0	0	0	0	0	0	0	0	0	0	0	0	0	0	0	0	0	0	0	0	0	0	0	0	0	0	0	0
PB.964.80	Txndc9	Txndc9-S-80	FSM	3.66809	2.67612	2.75031	2.16213	0	1.96174	0	2.055	0	0	3.27621	3.06512	3.32743	2.76866	3.40699	3.69994	0	0	0	0	0	0	0	0	4.08173	0	0	2.87225	0	0	0	0	0	0	0	0	0	0	0	0	0	0	0	0	0	0
PB.75739.36	Nkapd1	Nkapd1-S-36	FSM	0	2.04954	0	0	0	0	0	0	0	0	0	0	2.04338	0	1.64244	1.6832	0	2.01354	0	0	0	0	0	0	0	0	0	0	0	0	0	0	0	0	0	0	0	0	0	0	0	0	0	0	0	0
PB.35895.8	Ctnna1	Ctnna1-S-8	ISM	0	2.04954	2.11911	0	2.2995	0	0	0	0	0	0	2.41757	2.04338	0	1.64244	2.91945	1.57395	0	0	0	0	0	0	0	0	0	0	0	0	0	0	0	0	0	0	0	0	0	0	0	0	0	0	0	0	0
PB.22119.235	Gpbp1	Gpbp1-S-235	ISM	1.86468	2.04954	2.11911	0	0	0	0	0	0	0	0	0	0	2.13636	0	0	0	2.01354	0	0	0	0	0	3.04884	2.74483	0	0	0	0	4.4043	0	0	0	0	0	0	0	0	0	0	0	0	0	0	0	0
PB.72619.28	Zfp423	Zfp423-S-28	NNC	0	0	2.11911	0	2.2995	0	0	0	0	0	0	0	0	0	0	0	1.57395	0	0	0	2.99065	0	0	0	0	0	0	0	0	0	0	0	0	0	0	0	0	0	0	0	0	0	3.6987	0	0	0
PB.37448.12	AC142100.1	AC142100.1-S-12	NNC	1.86468	0	2.11911	0	0	0	0	0	0	0	1.99726	1.80981	0	0	1.64244	1.6832	0	0	0	0	0	0	0	0	0	2.71216	0	0	0	0	0	0	0	0	0	0	0	0	0	0	0	0	0	0	0	0
PB.75349.39	Olfr976	Olfr976-S-39	FSM	0	0	0	0	0	0	0	0	0	0	0	0	0	0	2.60293	1.6832	0	0	1.92483	0	0	0	0	0	3.40532	2.71216	0	0	0	0	0	0	0	0	0	0	0	0	0	0	0	0	0	0	0	0
PB.48305.184	Psmd4	Psmd4-S-184	ISM	4.27528	4.12518	4.63989	3.18091	4.40333	2.96193	3.11288	0	2.19357	0	4.16958	3.60454	3.87154	3.15298	2.60293	4.43406	0	3.96874	0	0	0	0	0	0	2.74483	0	0	0	0	0	0	0	3.10739	0	0	0	0	0	0	0	0	0	0	0	0	0
PB.74407.94	Dcun1d5	Dcun1d5-S-94	NNC	1.86468	0	2.11911	0	0	1.96174	0	0	0	0	1.99726	0	0	0	0	2.27886	0	0	0	2.84395	0	0	2.97402	3.04884	0	0	0	0	0	0	0	0	0	0	3.13018	0	0	0	0	0	0	0	0	0	0	0
PB.10209.1	Spred2	Spred2-S-1	NNC	0	0	0	0	0	0	0	0	0	0	0	0	0	0	0	0	0	0	0	0	0	0	0	0	0	0	0	0	0	0	0	0	0	0	0	0	0	0	0	0	0	0	0	0	0	0
PB.40634.14	Zmynd19	Zmynd19-S-14	ISM	0	2.04954	0	0	2.2995	0	2.09948	0	0	0	2.62014	2.41757	0	0	0	1.6832	0	2.01354	0	0	0	0	0	0	0	0	0	0	0	0	0	0	0	0	0	0	0	0	0	0	0	0	0	0	0	0
PB.71683.24	Hpf1	Hpf1-S-24	FSM	0	2.04954	0	0	0	0	0	0	0	0	1.99726	0	2.04338	0	0	1.6832	1.57395	0	0	0	0	0	0	0	2.74483	0	0	0	0	0	0	0	0	0	0	0	0	0	0	0	0	0	0	3.88715	0	0
PB.56301.1	Slc4a1ap	Slc4a1ap-S-1	FSM	0	0	0	0	0	1.96174	0	0	0	0	1.99726	1.80981	2.04338	2.13636	0	0	0	0	0	0	0	0	0	0	0	0	0	0	0	0	0	0	0	0	0	0	0	0	0	0	0	0	0	0	0	0
PB.72474.25	Gadd45gip1	Gadd45gip1-S-25	FSM	0	0	2.11911	0	0	0	0	0	0	0	0	2.41757	2.04338	2.13636	0	1.6832	0	0	0	0	0	0	0	0	0	0	0	0	0	0	0	0	0	0	0	0	0	0	0	0	0	0	0	0	0	0
PB.55887.85	Srpk2	Srpk2-S-85	NNC	0	0	0	0	0	0	2.09948	0	0	2.1791	0	1.80981	0	0	0	2.6496	0	0	1.92483	0	0	0	0	0	0	0	0	0	0	0	0	0	0	0	0	0	0	0	0	0	0	0	0	0	0	0
PB.55337.12	Cdk11b	Cdk11b-S-12	ISM	0	0	2.11911	0	0	0	0	0	2.19357	0	0	0	3.05164	2.76866	1.64244	1.6832	0	0	1.92483	0	0	0	0	0	0	0	0	0	0	0	0	0	0	0	0	0	0	0	0	0	0	0	0	0	0	0
PB.43383.2	Nusap1	Nusap1-S-2	ISM	2.47719	3.33425	3.13424	2.79601	3.3289	0	0	0	0	2.1791	2.62014	3.06512	3.05164	3.64657	3.40699	3.98142	0	2.63759	1.92483	0	0	0	0	0	0	0	0	0	0	0	0	0	0	0	0	0	0	0	0	0	0	0	0	0	0	0
PB.29869.2	Wdr53	Wdr53-S-2	ISM	0	0	0	0	0	0	0	0	0	0	0	0	0	0	0	3.30676	0	0	0	0	0	0	0	0	0	0	0	0	0	0	3.01019	0	0	0	0	0	0	0	0	0	0	0	0	0	0	0
PB.4530.160	Nuf2	Nuf2-S-160	ISM	0	2.04954	0	0	0	0	0	2.055	2.19357	0	0	0	2.04338	0	0	3.13174	0	0	0	0	0	0	0	0	0	0	0	0	0	0	0	0	0	0	0	0	0	0	0	0	0	0	0	0	0	0
PB.35630.9	Fhod3	Fhod3-S-9	NNC	1.86468	0	0	0	0	0	2.09948	2.055	0	0	0	0	0	2.13636	0	2.27886	1.57395	0	0	0	0	0	0	0	0	0	0	0	0	0	0	0	0	0	0	0	0	0	0	0	0	0	0	0	0	0
PB.70172.58	Timm44	Timm44-S-58	ISM	0	2.67612	0	2.16213	2.2995	0	0	0	0	0	0	2.41757	0	2.13636	0	1.6832	0	2.01354	0	0	0	0	0	0	0	0	0	0	0	0	0	0	0	0	0	0	0	0	0	0	0	0	0	0	0	0
PB.36022.6	Ik	Ik-S-6	ISM	3.51819	4.22892	2.11911	2.79601	4.00396	3.45185	2.09948	2.68196	2.19357	0	3.66901	3.27889	4.00247	3.42993	2.87192	4.26443	0	3.96874	2.92112	2.84395	0	0	0	0	2.74483	0	0	0	0	0	0	0	0	0	0	0	0	0	0	0	0	0	0	0	0	0
PB.63353.27	Kbtbd8	Kbtbd8-S-27	ISM	0	2.67612	2.11911	0	0	0	0	0	0	0	1.99726	1.80981	3.05164	2.13636	0	1.6832	1.57395	0	0	0	0	0	0	3.04884	0	0	0	0	0	0	0	0	0	0	0	0	0	0	0	0	0	0	0	0	0	0
PB.23556.79	Ktn1	Ktn1-S-79	ISM	0	0	0	0	0	1.96174	0	2.055	0	0	0	0	0	0	1.64244	2.6496	1.57395	2.01354	0	0	0	0	0	0	0	0	0	0	0	0	0	0	0	0	0	0	0	0	0	0	0	0	0	0	0	0
PB.75268.217	Chek1	Chek1-S-217	ISM	0	0	2.11911	0	2.2995	0	0	0	0	0	0	0	0	2.13636	1.64244	0	1.57395	0	0	0	0	0	0	0	0	0	0	0	0	0	0	0	0	0	0	0	0	0	0	0	0	0	0	0	0	0
PB.28291.124	Kmt2d	Kmt2d-S-124	ISM	0	0	0	0	0	0	0	0	0	0	0	0	2.04338	2.13636	0	1.6832	0	0	1.92483	2.84395	0	3.43962	0	0	0	2.71216	2.80904	2.87225	0	0	0	0	0	0	0	3.47019	0	0	0	0	0	0	0	0	0	0
PB.41077.119	Tor1a	Tor1a-S-119	ISM	1.86468	2.04954	0	0	0	0	0	0	0	0	1.99726	0	0	2.13636	0	1.6832	0	0	0	0	0	0	0	0	0	0	2.80904	0	0	0	0	0	0	0	0	0	0	0	0	0	0	0	0	0	0	0
PB.46265.3	Ralyl	Ralyl-S-3	NNC	0	0	0	2.16213	0	0	0	0	0	0	2.62014	0	0	2.13636	0	1.6832	0	0	0	3.50757	2.99065	0	3.64129	0	0	0	2.80904	0	0	0	0	0	0	0	0	0	0	0	0	0	0	0	0	0	0	0
PB.17446.82	Rbm25	Rbm25-S-82	ISM	0	0	2.11911	0	0	0	0	0	0	0	0	0	2.04338	0	0	2.27886	0	2.01354	0	0	0	0	0	0	0	0	0	0	0	0	0	0	0	0	0	0	0	0	0	0	0	0	0	0	0	0
PB.82052.54	Txlng	Txlng-S-54	ISM	2.47719	3.05837	3.41098	0	3.82529	3.62887	0	2.68196	0	0	3.95029	3.73467	4.00247	3.97556	3.93208	4.32423	1.57395	3.29432	2.92112	0	0	0	0	0	3.40532	0	0	2.87225	0	0	0	0	0	0	0	0	0	0	0	0	0	0	0	0	0	0
PB.38237.229	Oosp1	Oosp1-S-229	FSM	0	2.04954	0	0	0	0	0	0	0	0	2.62014	0	2.66954	2.13636	0	1.6832	0	2.01354	0	0	0	0	0	0	0	0	0	0	0	0	0	0	0	0	0	0	0	0	0	0	0	0	0	0	0	0
PB.2404.13	Ptma	Ptma-S-13	FSM	4.83976	4.40881	4.48734	4.13543	4.76728	3.62887	4.28522	4.01557	4.2864	3.47672	4.26348	4.47572	3.32743	4.72764	3.40699	3.69994	4.06706	4.1881	3.8677	4.7387	5.24695	5.49059	3.64129	4.11533	4.08173	3.7655	3.86665	4.21519	5.31305	5.49473	6.39531	6.50278	5.8976	6.38916	5.86092	6.27369	6.67938	7.10594	6.62234	6.36657	7.00021	7.10782	7.07568	6.91195	5.79559	6.65002
PB.37545.9	Rttn	Rttn-S-9	NNC	0	0	0	0	0	1.96174	0	0	0	0	0	1.80981	0	2.76866	0	0	0	2.01354	1.92483	2.84395	0	0	0	0	0	0	0	0	0	0	0	0	0	0	0	0	0	0	0	0	0	0	0	0	0	0
PB.39988.22	Zfp950	Zfp950-S-22	FSM	0	0	0	0	0	0	0	0	0	0	0	0	0	2.13636	0	0	0	0	0	0	0	0	0	0	0	0	0	0	0	0	0	0	3.10739	0	3.13018	0	0	0	0	0	0	4.12752	0	4.97199	0	0
PB.32852.12	U2af1	U2af1-S-12	ISM	0	0	0	2.16213	0	0	0	0	0	0	0	0	2.04338	0	0	0	1.57395	0	0	0	0	0	0	0	0	0	0	0	0	0	0	0	3.10739	0	0	0	3.78336	0	3.11123	0	0	0	3.6987	0	0	0
PB.65337.19	Pla2g4c	Pla2g4c-S-19	ISM	0	0	0	0	0	0	0	0	0	0	3.00104	0	2.66954	0	1.64244	0	0	0	0	0	2.99065	0	2.97402	0	2.74483	0	0	0	0	0	0	0	0	0	0	0	0	0	0	0	0	0	0	0	0	0
PB.52925.26	Prdx1	Prdx1-S-26	ISM	0	0	0	0	0	0	0	0	0	0	2.62014	2.41757	0	2.13636	1.64244	1.6832	0	0	1.92483	0	0	0	0	0	0	0	0	0	0	0	0	0	0	0	0	0	0	0	0	0	0	0	0	0	0	0
PB.76256.9	Anp32a	Anp32a-S-9	ISM	0	2.04954	0	0	2.2995	1.96174	0	0	0	0	2.62014	0	0	0	0	2.27886	0	0	0	0	0	0	0	0	0	0	0	0	0	0	0	0	0	0	0	0	0	0	0	0	0	0	0	0	0	0
PB.25648.60	Dnajc21	Dnajc21-S-60	ISM	2.47719	2.67612	0	0	0	0	2.09948	0	0	0	1.99726	0	2.04338	0	0	1.6832	0	2.01354	2.92112	0	0	0	0	0	0	0	0	0	0	0	0	0	0	0	0	0	0	0	0	0	0	0	0	0	0	0
PB.79709.3	Utp14a	Utp14a-S-3	ISM	0	0	0	2.16213	0	1.96174	0	0	0	0	1.99726	1.80981	2.04338	0	1.64244	2.27886	0	0	2.54223	0	0	0	0	0	0	0	0	0	0	0	0	0	0	0	0	0	0	0	0	0	0	0	0	0	0	0
PB.53355.8	Mtf1	Mtf1-S-8	FSM	0	0	0	0	0	0	0	0	0	0	0	1.80981	0	2.13636	0	2.91945	0	0	0	2.84395	0	0	0	0	2.74483	0	0	0	0	0	0	0	0	0	0	0	0	0	0	0	0	0	0	0	0	0
PB.15475.26	Smc6	Smc6-S-26	ISM	0	0	0	0	0	0	0	0	0	0	0	2.41757	0	3.15298	1.64244	2.27886	0	0	0	0	0	3.43962	0	0	0	0	0	0	0	0	0	0	0	0	0	0	0	0	0	0	0	0	0	0	0	0
PB.49933.605	Nexn	Nexn-S-605	ISM	1.86468	2.04954	0	0	0	0	0	0	0	0	1.99726	1.80981	0	0	1.64244	0	0	3.01892	0	0	0	0	0	0	0	0	0	0	0	0	0	0	0	0	0	0	0	0	0	0	0	0	0	0	0	0
PB.45789.6	Gm14295	Gm14295-S-6	NIC	0	0	0	0	0	0	0	0	0	0	0	0	0	0	0	1.6832	0	0	0	0	0	0	0	0	0	0	0	0	0	0	0	3.31925	0	0	0	0	0	0	0	0	0	0	0	0	0	0
PB.24685.22	Enox1	Enox1-S-22	FSM	0	2.04954	2.75031	0	0	0	0	2.68196	0	2.1791	2.62014	1.80981	0	2.13636	0	2.6496	0	0	0	0	0	0	0	0	0	0	0	0	0	0	0	0	0	0	0	0	0	0	0	0	0	0	0	0	0	0
PB.79607.87	Thoc2	Thoc2-S-87	ISM	0	0	0	0	0	0	2.09948	0	0	2.1791	0	0	0	2.13636	0	1.6832	0	2.01354	0	0	0	0	0	0	0	0	0	0	0	0	0	0	0	0	0	0	0	0	0	0	0	0	0	0	0	0
PB.11991.618	Elp5	Elp5-S-618	ISM	0	0	0	0	0	0	0	0	0	0	0	0	0	0	1.64244	0	0	0	0	0	0	0	0	0	0	0	0	0	0	0	0	3.31925	3.10739	0	3.13018	0	0	0	3.11123	3.61942	3.88458	0	0	0	0	0
PB.16931.30	Arid4a	Arid4a-S-30	ISM	0	0	0	2.16213	2.2995	2.58199	0	0	0	0	2.62014	1.80981	0	0	0	2.27886	0	0	0	0	0	0	0	0	0	0	0	0	0	0	0	0	0	0	0	0	0	0	0	0	0	0	0	0	0	0
PB.21559.31	Scamp1	Scamp1-S-31	ISM	0	0	2.11911	0	2.2995	0	0	0	2.19357	2.1791	0	0	0	2.13636	0	0	0	2.01354	0	0	0	0	0	0	0	0	0	0	0	0	0	0	0	0	0	0	0	0	0	0	0	0	0	0	0	0
PB.78709.822	mt-Nd5	mt-Nd5-S-822	FSM	5.33873	5.84638	5.6323	5.97424	5.49375	5.34137	5.19322	5.18166	4.64989	5.39578	6.14402	6.19744	6.46003	5.48062	5.07126	5.83731	4.57102	4.87363	4.41831	5.73168	4.89253	5.49059	5.86884	6.49828	6.46416	4.84855	5.31676	4.43537	4.62482	6.69582	5.04555	5.58873	6.39551	6.10203	5.79657	6.43592	6.95998	5.96256	6.36322	6.33488	5.94587	6.31031	5.87368	6.35308	6.1312	5.554
PB.81007.197	Atrx	Atrx-S-197	NIC	1.86468	0	2.11911	0	2.2995	0	0	0	0	0	0	1.80981	0	2.76866	1.64244	1.6832	0	2.63759	0	0	0	0	0	0	0	0	0	2.87225	0	0	0	0	0	0	0	0	0	0	0	0	0	0	0	0	0	0
PB.48472.22	Txnip	Txnip-S-22	ISM	0	2.04954	0	0	0	0	0	0	0	0	2.62014	0	3.05164	2.13636	1.64244	2.27886	0	0	0	0	0	0	0	0	0	0	0	0	0	0	0	0	0	0	0	0	0	0	0	0	0	0	0	0	0	0
PB.78286.23	Cnot10	Cnot10-S-23	ISM	0	0	0	0	0	0	0	0	0	0	0	0	0	0	0	0	0	0	0	0	0	0	0	0	0	0	0	0	0	0	0	0	3.10739	0	0	0	0	0	0	0	0	0	0	0	0	0
PB.71645.72	Hmgb2	Hmgb2-S-72	ISM	0	2.04954	2.11911	0	0	0	0	0	0	0	0	0	0	2.13636	1.64244	1.6832	0	0	0	0	0	0	0	0	0	0	0	0	0	0	0	0	0	0	0	0	0	0	0	0	0	0	0	0	0	0
PB.49569.2	Slc9b1	Slc9b1-S-2	FSM	3.51819	3.55023	3.13424	0	3.60758	0	0	2.68196	2.19357	2.1791	3.00104	2.41757	2.04338	2.76866	2.87192	4.32423	2.15772	2.01354	1.92483	3.50757	2.99065	0	0	0	3.40532	0	0	0	0	0	0	0	0	0	0	0	0	0	0	2.95272	0	0	0	0	0	0
PB.13445.72	Phb	Phb-S-72	NNC	0	2.67612	0	0	0	1.96174	0	2.055	0	0	0	1.80981	2.04338	0	2.60293	1.6832	0	0	0	0	0	0	0	0	0	0	2.80904	0	0	0	0	0	0	0	0	0	0	0	0	0	0	0	0	0	0	0
PB.37545.18	Rttn	Rttn-S-18	NNC	1.86468	0	0	0	0	0	0	0	0	0	0	0	0	0	0	2.27886	2.15772	0	1.92483	0	0	0	0	0	2.74483	0	0	0	0	0	0	0	0	0	0	0	0	0	0	0	0	0	0	0	0	0
PB.77442.135	Rasa2	Rasa2-S-135	ISM	2.47719	0	2.11911	0	0	0	2.09948	0	2.19357	0	1.99726	2.79287	0	2.76866	1.64244	2.91945	0	0	0	0	0	0	0	0	0	0	0	0	0	0	0	0	0	0	0	0	0	0	0	0	0	0	0	0	0	0
PB.27784.21	Smc1b	Smc1b-S-21	ISM	1.86468	0	0	2.16213	0	0	0	0	0	0	0	0	2.04338	2.13636	1.64244	2.6496	0	0	0	0	0	0	0	0	0	0	0	0	0	0	0	0	0	0	0	0	0	0	0	0	0	0	0	0	0	0
PB.43383.13	Nusap1	Nusap1-S-13	ISM	0	0	2.11911	0	0	1.96174	0	0	0	0	0	1.80981	2.66954	2.13636	1.64244	1.6832	0	0	0	0	0	0	0	0	0	0	0	0	0	0	0	0	0	0	0	0	0	0	0	0	0	0	0	0	0	0
PB.8240.128	Scyl2	Scyl2-S-128	ISM	0	0	0	0	0	0	0	2.055	0	0	1.99726	0	3.05164	2.13636	0	0	0	0	0	0	0	0	0	3.04884	0	0	0	0	0	0	0	0	0	0	0	0	0	0	0	0	0	0	0	0	0	0
PB.3265.20	Ubxn4	Ubxn4-S-20	ISM	3.12744	4.00941	4.30727	3.67498	3.60758	4.22287	2.72941	2.055	2.19357	2.1791	4.56988	4.04659	4.40183	3.82454	3.65091	4.62305	3.32431	3.68734	3.41016	0	0	0	0	0	0	0	0	0	0	0	0	0	0	0	0	0	0	0	0	0	0	0	0	0	0	0
PB.24989.40	Lmo7	Lmo7-S-40	NIC	2.85426	2.04954	0	0	2.2995	1.96174	2.09948	0	0	0	2.62014	1.80981	3.32743	3.64657	3.40699	3.45567	2.79133	2.63759	0	0	0	0	0	0	0	0	0	0	0	0	0	0	0	0	0	0	0	0	0	0	0	0	0	0	0	0
PB.31900.153	Zfp97	Zfp97-S-153	FSM	0	0	0	0	0	0	0	0	0	0	0	0	0	2.76866	1.64244	0	0	0	0	0	0	0	0	0	2.74483	0	0	0	0	0	0	0	0	0	0	0	0	0	0	0	0	0	0	0	0	0
PB.77094.59	Mei4	Mei4-S-59	NNC	1.86468	0	2.11911	0	0	0	0	0	2.19357	0	1.99726	0	0	2.13636	0	1.6832	2.15772	0	1.92483	0	0	0	2.97402	0	0	2.71216	0	0	0	0	0	0	0	0	0	0	3.11271	0	0	0	0	0	0	0	0	0
PB.16275.41	Pnpla8	Pnpla8-S-41	FSM	0	0	0	0	0	0	0	0	0	0	1.99726	0	0	0	0	0	0	0	0	2.84395	0	0	0	0	0	0	0	0	0	0	0	0	0	0	0	0	0	2.96822	0	0	0	0	0	0	0	0
PB.45704.8	Gm14393	Gm14393-S-8	FSM	0	0	0	0	0	0	0	0	0	0	0	0	0	0	0	0	0	0	0	0	0	0	0	0	0	0	0	0	0	0	0	0	0	0	0	0	0	0	0	0	0	0	0	0	0	0
PB.73682.12	Gcsh	Gcsh-S-12	ISM	0	0	0	0	0	0	0	0	0	0	0	0	0	0	0	0	0	0	0	0	0	0	0	0	0	0	0	0	0	0	0	3.99414	3.10739	0	0	3.47019	3.11271	0	0	0	0	0	0	4.56999	0	0
PB.47496.4	Smc4	Smc4-S-4	ISM	4.83976	5.3504	4.56652	4.25144	4.00396	3.62887	3.38938	2.68196	3.88779	2.81401	3.95029	3.73467	5.1294	5.10782	3.93208	4.919	4.35046	6.76921	5.2688	0	3.65835	0	0	3.04884	0	0	0	0	0	0	0	0	0	0	0	0	0	0	0	0	0	0	0	0	0	0
PB.58349.102	Mtf2	Mtf2-S-102	ISM	0	2.67612	0	0	0	1.96174	0	0	0	0	1.99726	0	2.04338	2.76866	2.23382	0	0	0	1.92483	0	0	0	0	0	0	0	0	0	0	0	0	0	0	0	0	0	0	0	0	0	0	0	0	0	0	0
PB.71037.8	Tex15	Tex15-S-8	NIC	0	0	0	0	0	1.96174	2.09948	0	0	0	0	0	2.04338	2.76866	1.64244	0	2.15772	0	0	0	0	0	0	0	0	0	0	3.5367	0	0	0	0	0	0	0	0	0	0	0	0	0	0	0	0	0	0
PB.76330.63	Zwilch	Zwilch-S-63	ISM	1.86468	0	2.11911	2.16213	0	0	0	0	0	0	0	2.41757	2.04338	0	0	1.6832	0	0	0	0	0	0	0	0	0	0	0	0	0	0	0	0	0	0	0	0	0	0	0	0	0	0	0	0	0	0
PB.12079.83	Pfn1	Pfn1-S-83	FSM	0	0	0	0	0	0	0	0	0	0	0	2.41757	0	0	0	0	0	0	0	0	0	0	0	0	0	0	0	0	0	0	0	0	0	0	0	0	0	0	0	2.95272	0	0	0	0	0	0
PB.26221.107	Ywhaz	Ywhaz-S-107	ISM	1.86468	0	0	0	2.2995	1.96174	0	0	0	0	1.99726	1.80981	2.04338	2.13636	2.23382	0	0	2.01354	0	0	0	0	0	0	0	0	0	0	0	0	0	0	0	0	0	0	0	0	0	0	0	0	0	0	0	0
PB.58824.52	Cit	Cit-S-52	ISM	2.47719	0	0	0	2.94119	0	0	0	2.19357	0	0	1.80981	0	2.13636	1.64244	1.6832	0	0	0	0	0	0	0	0	0	0	0	0	0	0	0	0	0	0	0	0	0	0	0	0	0	0	0	0	0	0
PB.45829.9	Gm14325	Gm14325-S-9	FSM	0	0	0	0	0	0	0	0	0	0	0	0	0	2.13636	0	0	0	0	0	0	0	0	0	0	0	0	0	0	0	0	0	0	0	0	0	0	0	0	0	0	0	0	0	0	0	0
PB.38094.28	Polr2g	Polr2g-S-28	FSM	0	2.04954	0	0	0	1.96174	0	0	0	0	3.00104	0	2.04338	0	1.64244	2.91945	2.52389	0	1.92483	0	0	0	0	0	3.79966	0	2.80904	0	0	0	0	0	0	0	0	0	0	0	0	0	0	0	0	0	0	0
PB.79207.8	Rgn	Rgn-S-8	NNC	0	2.67612	0	0	0	1.96174	0	0	0	0	2.62014	0	2.66954	0	1.64244	1.6832	0	2.63759	1.92483	0	0	0	0	0	0	0	0	0	0	0	0	0	0	0	0	0	0	0	0	0	0	0	0	0	0	0
PB.71587.196	Neil3	Neil3-S-196	NIC	0	2.04954	0	0	0	0	0	0	0	0	0	1.80981	0	2.76866	1.64244	2.27886	0	0	0	0	0	0	0	0	0	0	0	0	0	0	0	0	0	0	0	0	0	0	0	0	0	0	0	0	0	0
PB.8743.7	Osbpl8	Osbpl8-S-7	FSM	0	0	0	2.16213	0	0	0	0	0	0	0	1.80981	3.32743	2.76866	0	1.6832	0	0	0	0	0	0	0	0	0	0	0	0	0	0	0	0	0	0	0	0	0	0	0	0	0	0	0	0	0	0
PB.71752.591	Trim61	Trim61-S-591	NNC	0	2.04954	0	0	2.2995	0	2.09948	0	0	0	1.99726	0	2.04338	0	1.64244	2.91945	0	0	0	0	2.99065	0	0	0	0	0	0	0	0	0	0	0	0	0	0	0	0	0	0	0	0	0	0	0	0	0
PB.48396.49	BC028528	BC028528-S-49	FSM	0	0	0	0	0	0	0	0	0	0	0	0	0	0	0	0	0	0	0	0	0	0	0	0	0	0	0	0	0	0	3.01019	0	0	0	0	0	0	0	0	2.95272	0	0	0	0	0	0
PB.3265.21	Ubxn4	Ubxn4-S-21	ISM	0	2.04954	3.13424	0	0	1.96174	2.09948	0	2.19357	2.1791	3.00104	3.06512	3.05164	2.76866	3.25834	3.80283	2.52389	3.29432	2.54223	2.84395	0	0	0	0	0	0	0	0	0	0	0	0	0	0	0	0	0	0	0	0	0	0	0	0	0	0
PB.26059.64	Cct5	Cct5-S-64	ISM	2.47719	2.04954	2.11911	0	0	0	0	0	0	0	0	1.80981	0	0	0	2.27886	0	0	0	0	0	0	0	0	0	0	0	0	0	0	0	0	0	0	0	0	0	0	0	0	0	0	0	0	0	0
PB.65337.29	Pla2g4c	Pla2g4c-S-29	ISM	0	2.04954	0	0	0	0	0	0	0	0	1.99726	0	0	0	1.64244	2.27886	0	2.01354	0	0	0	0	0	0	0	0	0	0	0	0	0	0	0	0	0	0	0	0	0	0	0	0	0	0	0	0
PB.10770.304	Mat2b	Mat2b-S-304	ISM	1.86468	3.33425	3.41098	2.16213	3.60758	3.23659	2.09948	2.055	0	0	3.00104	2.79287	3.87154	2.76866	2.60293	3.30676	1.57395	0	0	0	0	0	0	0	0	0	0	0	0	0	0	0	0	0	0	0	0	0	0	0	0	0	0	0	0	0
PB.958.14	Eif5b	Eif5b-S-14	ISM	3.12744	4.62952	3.41098	3.18091	3.3289	2.96193	2.72941	2.055	3.21493	3.47672	4.50162	3.60454	4.62251	3.97556	3.65091	4.53301	2.52389	3.68734	4.18043	0	2.99065	0	0	0	2.74483	0	0	2.87225	0	0	3.01019	0	0	0	0	0	0	0	0	0	0	0	0	0	0	0
PB.46658.36	Mrpl47	Mrpl47-S-36	FSM	3.12744	3.05837	2.11911	2.16213	2.94119	1.96174	2.72941	2.055	2.19357	2.1791	0	3.27889	3.54337	3.15298	3.08368	3.69994	0	0	0	0	0	0	0	0	0	0	0	0	0	0	0	0	0	0	0	0	0	0	0	0	0	0	0	0	0	0
PB.43746.65	Blvra	Blvra-S-65	NNC	1.86468	0	2.11911	2.16213	0	1.96174	0	0	0	0	0	0	0	0	1.64244	1.6832	0	0	0	0	0	0	0	0	0	0	0	0	0	0	0	0	0	0	0	0	0	0	0	0	0	0	0	0	0	0
PB.17357.9	Srsf5	Srsf5-S-9	ISM	2.85426	2.67612	2.11911	0	0	2.96193	2.09948	0	0	0	0	1.80981	3.05164	2.76866	2.87192	2.27886	0	2.63759	0	0	0	0	0	0	0	0	0	0	0	0	0	0	0	0	0	0	0	0	0	0	0	0	0	0	0	0
PB.11086.18	0610009B22Rik	0610009B22Rik-S-18	FSM	0	0	0	0	0	0	0	0	0	0	0	1.80981	0	0	2.23382	1.6832	0	0	0	0	2.99065	0	0	0	0	0	0	2.87225	0	0	0	0	0	0	0	0	0	0	0	0	0	0	0	0	0	0
PB.40218.7	Kin	Kin-S-7	FSM	1.86468	2.04954	2.11911	0	3.3289	0	2.09948	0	0	0	3.27621	2.41757	0	2.13636	2.23382	2.6496	0	2.01354	1.92483	0	0	0	0	0	0	0	0	0	0	0	0	0	0	0	0	0	0	0	0	0	0	0	0	0	0	0
PB.57480.25	Rest	Rest-S-25	ISM	1.86468	0	0	0	0	0	0	0	0	0	3.00104	2.41757	2.66954	0	1.64244	0	0	0	0	0	0	0	0	0	0	0	0	0	0	0	0	0	0	0	0	0	0	0	0	0	0	0	0	0	0	0
PB.77503.24	Mrps22	Mrps22-S-24	ISM	0	0	0	0	0	0	0	0	0	2.1791	1.99726	0	2.04338	2.13636	0	1.6832	1.57395	0	0	0	2.99065	0	0	0	0	0	0	0	0	0	0	3.31925	0	0	0	0	0	0	0	0	0	0	0	0	0	0
PB.19376.2	Hist1h1a	Hist1h1a-S-2	FSM	1.86468	2.04954	2.11911	0	2.2995	1.96174	0	0	0	0	2.62014	0	3.05164	2.13636	1.64244	2.27886	0	0	0	0	0	0	0	0	3.40532	0	0	0	4.62482	0	0	0	0	0	0	0	0	0	0	0	0	0	0	0	0	0
PB.52738.4	Nrd1	Nrd1-S-4	ISM	0	2.04954	0	0	2.2995	0	0	2.055	0	0	0	0	0	2.13636	0	1.6832	0	0	0	0	0	0	0	0	0	0	0	0	0	0	0	0	0	0	0	0	0	0	0	0	0	0	0	0	0	0
PB.3255.4	R3hdm1	R3hdm1-S-4	FSM	1.86468	2.04954	2.75031	0	2.2995	0	0	0	0	0	0	0	0	2.13636	1.64244	2.6496	0	0	0	0	0	0	0	0	0	0	0	0	0	0	0	0	0	0	0	0	0	0	0	0	0	0	0	0	0	0
PB.11690.20	Pigl	Pigl-S-20	NNC	0	0	0	0	0	0	0	0	0	0	0	0	0	0	0	0	0	0	0	0	0	0	0	0	0	0	0	0	0	0	0	0	0	0	0	0	0	0	0	0	0	0	0	0	0	0
PB.61837.64	Nobox	Nobox-S-64	ISM	0	2.04954	2.11911	0	2.2995	2.96193	0	0	0	0	1.99726	1.80981	2.66954	2.13636	0	2.6496	0	2.01354	0	0	0	0	0	0	0	0	0	0	0	0	0	0	0	0	0	0	0	0	0	0	0	0	0	0	0	0
PB.2391.350	Ncl	Ncl-S-350	ISM	2.47719	3.72776	2.11911	0	2.2995	2.58199	0	0	0	0	4.06593	3.45491	4.40183	3.82454	3.40699	4.70564	1.57395	3.68734	2.92112	0	0	0	0	0	0	0	0	0	0	0	0	0	0	0	0	0	0	0	0	0	0	0	0	0	0	0
PB.42050.29	Ssb	Ssb-S-29	ISM	1.86468	2.04954	0	0	0	1.96174	0	0	0	0	3.00104	3.06512	4.31593	2.76866	1.64244	3.13174	0	2.01354	0	0	0	0	0	0	0	0	0	0	0	0	0	0	0	0	0	0	0	0	0	0	0	0	0	0	0	0
PB.40014.183	Hspa14	Hspa14-S-183	ISM	1.86468	0	0	0	0	0	0	0	0	0	1.99726	1.80981	0	0	1.64244	0	1.57395	0	0	0	0	0	0	0	2.74483	0	0	0	0	0	0	0	0	0	0	0	0	0	0	0	0	0	0	0	0	0
PB.77623.37	Pccb	Pccb-S-37	ISM	0	0	0	0	0	0	0	0	0	0	0	0	0	0	0	0	0	0	0	0	0	0	0	0	0	0	0	0	0	0	0	0	3.10739	0	3.13018	0	0	0	0	0	0	0	0	0	0	0
PB.63923.106	Wnk1	Wnk1-S-106	ISM	1.86468	0	0	0	0	0	0	0	0	0	0	0	0	2.13636	1.64244	1.6832	0	2.01354	0	0	0	0	0	0	0	0	0	0	0	0	0	0	3.10739	0	0	0	0	0	0	0	0	0	0	0	0	0
PB.47364.8	Gmps	Gmps-S-8	ISM	0	2.04954	0	0	2.2995	0	0	0	0	0	1.99726	2.41757	3.05164	2.13636	2.23382	3.13174	0	2.01354	1.92483	0	0	0	0	0	0	0	0	0	0	0	0	0	0	0	0	0	0	0	0	0	0	0	0	0	0	0
PB.63789.171	H1foo	H1foo-S-171	FSM	0	0	0	0	0	0	2.09948	0	0	0	0	1.80981	2.66954	2.13636	1.64244	1.6832	1.57395	0	0	0	0	0	0	0	0	0	0	0	0	0	0	0	0	0	0	0	0	0	0	0	0	0	0	0	0	0
PB.23198.68	Mapk8	Mapk8-S-68	FSM	1.86468	0	0	0	0	0	0	0	0	0	1.99726	0	0	0	0	0	0	0	0	0	4.05518	0	0	0	0	2.71216	2.80904	0	0	0	0	0	0	0	0	0	0	0	0	0	0	0	0	0	0	0
PB.24989.42	Lmo7	Lmo7-S-42	NIC	0	0	0	0	0	0	0	0	0	0	1.99726	0	2.04338	0	1.64244	0	0	0	0	0	0	0	0	0	2.74483	0	2.80904	0	0	0	0	0	0	0	0	0	0	0	0	0	0	0	0	0	0	0
PB.78794.120	Bmp15	Bmp15-S-120	FSM	0	0	0	0	0	2.58199	0	0	0	0	0	0	0	2.13636	2.23382	1.6832	0	0	0	2.84395	0	0	0	3.04884	0	0	0	0	0	0	0	0	0	0	0	0	0	0	0	0	0	0	0	0	0	0
PB.71984.41	Rpl18a	Rpl18a-S-41	FSM	0	0	0	0	0	0	0	0	0	0	0	0	0	0	0	0	0	2.01354	0	0	0	0	0	0	0	0	0	0	0	0	0	0	0	0	3.13018	0	3.11271	0	0	2.95272	0	0	0	0	0	0
PB.67098.12	Cyth2	Cyth2-S-12	ISM	0	0	0	0	0	0	0	0	0	0	0	0	0	0	0	0	0	0	0	0	0	0	0	0	3.40532	0	0	0	0	0	0	3.31925	0	0	0	0	0	0	0	0	0	0	0	0	0	0
PB.57326.7	Ociad1	Ociad1-S-7	ISM	1.86468	2.04954	0	0	0	1.96174	0	0	0	0	0	0	2.04338	0	0	1.6832	0	0	0	0	0	0	0	0	0	0	0	0	0	0	0	0	0	0	0	0	0	0	0	0	0	0	0	0	0	0
PB.46534.7	Tnik	Tnik-S-7	NNC	1.86468	0	0	0	0	0	0	2.055	0	0	0	1.80981	0	0	1.64244	0	0	0	0	0	0	0	0	0	2.74483	0	0	0	0	0	0	0	0	0	0	0	0	0	0	0	0	0	0	0	0	0
PB.32588.114	Srpk1	Srpk1-S-114	FSM	2.47719	0	0	2.16213	2.2995	1.96174	0	0	0	0	0	0	0	0	2.23382	3.13174	0	0	0	0	0	0	0	0	3.40532	0	0	0	0	0	0	0	0	0	0	0	0	0	0	0	0	0	0	0	0	0
PB.64312.77	Rhno1	Rhno1-S-77	FSM	0	0	0	0	0	0	0	0	0	0	0	0	2.04338	0	0	1.6832	0	0	0	0	3.65835	0	2.97402	0	0	0	2.80904	0	3.94143	0	0	0	0	0	0	3.47019	0	0	0	0	0	0	0	0	0	0
PB.49933.439	Nexn	Nexn-S-439	ISM	2.47719	0	2.75031	2.16213	3.3289	3.23659	2.72941	2.055	0	2.1791	3.27621	1.80981	3.54337	2.76866	3.08368	2.91945	1.57395	2.63759	1.92483	0	0	0	0	0	2.74483	0	0	0	0	0	0	0	0	0	0	0	0	0	0	0	3.88458	0	0	0	0	0
PB.19746.230	Riok1	Riok1-S-230	ISM	1.86468	0	0	0	2.2995	0	0	0	0	0	0	0	2.04338	2.13636	0	1.6832	0	0	0	0	0	0	0	0	0	0	0	0	0	0	0	0	0	0	0	0	0	0	0	0	0	0	0	0	0	0
PB.24149.19	Trim13	Trim13-S-19	FSM	2.85426	2.04954	0	0	0	0	0	0	0	0	1.99726	0	0	2.76866	1.64244	3.13174	0	0	0	2.84395	0	0	0	0	0	0	0	0	0	0	0	0	0	0	0	0	0	0	0	0	0	0	0	0	0	0
PB.50924.37	Dnaja1	Dnaja1-S-37	ISM	3.12744	2.67612	3.41098	2.16213	3.60758	2.58199	0	0	0	0	2.62014	2.79287	2.66954	3.42993	3.08368	3.30676	0	2.63759	0	0	0	0	0	0	2.74483	0	0	0	0	0	0	0	0	0	0	0	0	0	0	0	0	0	0	0	0	0
PB.35826.26	Pkd2l2	Pkd2l2-S-26	ISM	2.47719	0	2.75031	0	2.2995	1.96174	3.11288	3.06435	2.19357	2.1791	3.49177	0	2.04338	2.76866	2.23382	2.91945	0	2.01354	1.92483	0	0	0	0	0	0	2.71216	0	2.87225	0	0	0	0	0	0	0	0	0	0	0	0	0	0	0	0	0	0
PB.35020.12	Gm1976	Gm1976-S-12	NNC	0	0	0	0	0	0	0	0	0	0	0	0	0	0	0	0	0	0	0	0	0	0	0	0	0	0	0	0	0	0	0	3.31925	0	0	0	0	0	0	0	0	0	0	0	0	0	0
PB.12804.2	Zfp830	Zfp830-S-2	FSM	1.86468	0	0	2.16213	0	0	0	0	0	0	3.00104	2.41757	3.54337	2.76866	2.23382	3.30676	0	2.01354	0	0	0	0	0	0	0	0	0	0	0	0	0	0	0	0	0	0	0	0	0	0	0	0	0	0	0	0
PB.20568.92	Gkap1	Gkap1-S-92	ISM	2.47719	2.04954	2.75031	0	0	0	0	2.055	0	0	1.99726	2.79287	3.32743	2.13636	2.60293	2.91945	0	2.63759	0	0	0	0	0	0	2.74483	0	0	0	0	0	0	0	0	0	3.13018	0	0	0	0	0	0	0	0	0	0	0
PB.31156.68	Cfap298	Cfap298-S-68	ISM	1.86468	0	2.11911	0	3.3289	0	0	0	0	0	1.99726	2.41757	2.04338	2.13636	0	1.6832	0	2.01354	0	0	0	0	0	0	0	0	0	0	0	0	0	0	0	0	0	0	0	0	0	0	0	0	0	0	0	0
PB.57326.9	Ociad1	Ociad1-S-9	NIC	0	0	2.75031	0	0	0	2.09948	0	0	2.1791	0	1.80981	2.04338	0	0	2.27886	0	0	0	0	0	0	0	0	0	0	0	0	0	0	0	0	0	0	0	0	0	0	0	0	0	0	0	0	0	0
PB.23606.51	Naa30	Naa30-S-51	FSM	0	0	0	0	0	0	0	0	0	0	1.99726	0	0	0	0	1.6832	1.57395	0	1.92483	0	0	0	0	0	0	2.71216	2.80904	2.87225	0	0	0	0	0	0	0	3.47019	0	0	0	0	0	0	0	0	0	0
PB.52208.23	Ift74	Ift74-S-23	ISM	0	2.04954	0	0	0	0	0	0	0	0	0	1.80981	0	2.13636	0	1.6832	0	2.01354	0	0	0	0	0	0	0	0	0	0	0	0	0	0	0	0	0	0	0	0	0	0	0	0	0	0	0	0
PB.45537.136	Pfdn4	Pfdn4-S-136	NNC	3.12744	3.33425	2.11911	2.79601	0	1.96174	2.72941	0	3.49252	2.1791	2.62014	3.06512	2.04338	0	3.08368	2.91945	1.57395	2.01354	2.92112	0	4.05518	0	0	0	2.74483	2.71216	2.80904	0	0	0	0	0	0	0	0	0	0	0	0	0	0	0	0	0	0	0
PB.6913.26	P4ha1	P4ha1-S-26	NNC	2.85426	2.67612	0	2.16213	2.94119	1.96174	0	0	2.19357	0	2.62014	2.41757	3.87154	3.15298	3.65091	3.89611	2.15772	2.01354	2.54223	0	2.99065	0	0	0	0	2.71216	0	0	0	0	0	0	0	0	0	0	0	0	0	0	0	0	0	0	0	0
PB.74853.36	Spc24	Spc24-S-36	FSM	1.86468	2.04954	0	0	0	0	0	0	0	0	0	0	0	0	0	0	0	0	0	0	0	0	0	0	0	0	0	0	0	0	0	0	0	0	0	0	0	0	0	0	0	0	0	0	0	0
PB.22325.12	4833420G17Rik	4833420G17Rik-S-12	FSM	0	0	0	0	0	1.96174	0	0	0	0	0	0	0	0	0	0	0	0	0	0	0	0	0	0	0	0	0	0	0	0	3.01019	0	0	0	0	0	0	0	3.11123	0	0	0	0	0	0	0
PB.55337.14	Cdk11b	Cdk11b-S-14	NIC	0	0	0	0	0	1.96174	0	0	0	0	1.99726	2.41757	0	0	1.64244	1.6832	1.57395	0	0	0	0	0	0	0	0	0	0	0	0	0	0	0	0	0	0	0	0	0	0	0	0	0	0	0	0	0
PB.9927.10	Ppia	Ppia-S-10	NIC	0	0	0	0	0	0	0	0	0	0	0	0	0	0	0	0	0	0	0	0	0	0	0	0	0	0	0	2.87225	0	0	0	0	3.77792	0	0	0	0	0	0	0	0	0	3.6987	0	0	0
PB.30650.75	Gm813	Gm813-S-75	FSM	0	2.04954	2.11911	0	0	0	0	0	0	0	0	0	2.04338	0	0	2.6496	0	2.01354	0	0	0	0	0	0	0	0	0	0	0	0	0	0	0	0	0	0	0	0	0	0	0	0	0	0	0	0
PB.55307.11	Prkcz	Prkcz-S-11	ISM	1.86468	0	0	0	0	0	0	0	0	0	0	0	0	2.13636	0	0	0	0	0	0	0	0	0	0	0	0	0	0	0	0	0	0	0	0	0	0	0	0	0	0	0	0	0	0	0	0
PB.58431.109	Zfp932	Zfp932-S-109	FSM	1.86468	0	0	0	0	0	2.09948	0	0	0	2.62014	0	0	2.13636	0	1.6832	0	0	0	0	0	0	3.64129	0	0	2.71216	0	2.87225	0	0	0	0	0	0	0	0	0	0	0	0	0	4.12752	0	0	0	0
PB.1497.126	Ppil3	Ppil3-S-126	ISM	0	0	0	0	0	0	0	0	0	0	0	0	0	0	0	0	0	0	0	0	0	0	0	0	0	0	0	0	0	0	0	0	0	0	0	0	0	0	0	0	0	0	0	0	0	0
PB.57085.13	Ube2k	Ube2k-S-13	ISM	0	0	2.11911	0	0	0	0	0	0	0	2.62014	1.80981	2.66954	0	0	1.6832	0	0	0	0	0	0	0	3.04884	0	0	0	0	0	0	0	0	0	0	0	0	0	0	0	0	0	0	0	0	0	0
PB.36893.36	Lman1	Lman1-S-36	ISM	2.47719	0	0	0	2.2995	0	0	0	0	0	0	2.79287	3.05164	0	2.23382	2.6496	0	0	0	0	0	0	0	0	0	0	0	0	0	0	0	0	0	0	0	0	0	0	0	0	0	0	0	0	0	0
PB.43539.17	Wdr76	Wdr76-S-17	ISM	0	0	0	0	0	0	0	0	0	0	0	1.80981	0	0	1.64244	0	0	2.01354	0	0	0	0	0	0	0	0	2.80904	3.93241	0	0	0	0	0	0	0	0	0	0	0	0	0	0	0	0	0	0
PB.80677.41	Las1l	Las1l-S-41	ISM	0	0	0	0	2.2995	0	0	2.055	0	0	0	1.80981	0	2.13636	0	1.6832	0	0	0	0	0	0	0	0	0	0	0	0	0	0	0	0	0	0	0	0	0	0	0	0	0	0	0	0	0	0
PB.52425.1	Leprot	Leprot-S-1	FSM	1.86468	0	2.75031	0	0	0	3.11288	0	2.82934	0	0	0	0	0	0	1.6832	0	0	0	0	0	0	0	0	0	0	0	0	0	0	0	3.31925	0	0	0	0	3.11271	0	0	0	0	0	0	0	0	0
PB.49933.519	Nexn	Nexn-S-519	ISM	0	2.04954	0	0	2.2995	1.96174	2.72941	0	0	0	1.99726	1.80981	2.04338	0	0	0	0	0	1.92483	0	0	0	0	0	0	0	0	0	0	0	0	0	0	0	0	0	0	0	0	0	0	0	0	0	0	0
PB.62603.9	Immt	Immt-S-9	ISM	1.86468	0	2.75031	0	2.2995	1.96174	0	0	0	0	2.62014	0	2.04338	2.76866	0	2.6496	0	0	1.92483	0	0	0	0	0	0	0	0	0	0	0	0	0	0	0	0	0	0	0	0	0	0	0	0	0	0	0
PB.49933.532	Nexn	Nexn-S-532	NIC	1.86468	0	2.11911	0	2.2995	0	0	0	2.19357	0	0	1.80981	0	0	0	0	0	2.63759	0	0	0	0	0	0	0	0	0	0	0	0	0	0	0	0	0	0	0	0	3.11123	0	0	0	0	0	0	0
PB.18854.82	Gtpbp4	Gtpbp4-S-82	ISM	0	2.67612	0	2.16213	0	0	0	0	0	0	1.99726	0	2.04338	2.13636	1.64244	2.27886	1.57395	2.63759	1.92483	0	0	0	0	0	0	0	0	0	0	0	0	0	0	0	0	0	0	0	0	0	0	0	0	0	0	0
PB.39136.34	Noc3l	Noc3l-S-34	ISM	1.86468	2.04954	0	0	0	1.96174	0	0	0	0	0	1.80981	0	0	0	1.6832	0	2.01354	0	0	0	0	0	0	0	0	0	0	0	0	0	0	0	0	0	0	0	0	0	0	0	0	0	0	0	0
PB.65121.217	Rfpl4	Rfpl4-S-217	FSM	0	2.04954	2.11911	0	0	0	0	0	0	0	1.99726	2.41757	2.04338	0	0	0	0	0	0	0	0	0	0	0	0	0	0	0	0	0	0	0	0	0	0	0	0	0	0	0	0	0	0	0	0	0
PB.82093.75	Zrsr2	Zrsr2-S-75	NIC	3.66809	2.04954	2.75031	2.16213	2.94119	2.58199	2.09948	0	0	2.1791	3.27621	3.06512	3.05164	3.42993	2.60293	4.26443	2.52389	3.29432	2.54223	0	0	0	3.64129	0	0	0	2.80904	0	0	0	0	0	0	0	0	0	0	0	0	0	0	0	0	0	0	0
PB.48144.5	Ints3	Ints3-S-5	ISM	0	0	0	0	0	1.96174	0	0	2.19357	0	0	0	2.04338	0	0	1.6832	0	0	0	0	0	0	0	0	0	0	0	0	0	0	0	0	0	0	0	0	3.11271	0	0	0	0	0	0	0	4.19825	0
PB.17556.46	Npc2	Npc2-S-46	FSM	0	0	0	0	0	0	0	0	0	0	0	0	0	0	0	0	0	0	0	0	2.99065	0	0	0	0	0	0	0	0	0	0	3.31925	0	0	0	0	0	0	0	0	0	0	0	0	0	0
PB.54794.122	Zfp981	Zfp981-S-122	FSM	0	0	0	0	0	0	0	0	0	0	0	0	0	0	0	0	0	0	0	0	0	0	0	0	0	0	0	0	0	0	0	0	0	0	0	0	0	0	0	0	0	0	0	0	0	0
PB.2391.359	Ncl	Ncl-S-359	ISM	2.47719	3.55023	3.13424	0	0	1.96174	0	2.68196	0	0	3.00104	2.79287	3.72086	4.32659	3.25834	3.58524	1.57395	4.5885	3.41016	0	2.99065	0	0	0	0	0	0	0	0	0	0	0	0	0	0	0	0	0	0	0	0	0	0	0	0	0
PB.4726.3	Fmn2	Fmn2-S-3	NNC	0	0	2.11911	0	0	2.58199	0	0	0	0	0	2.41757	2.04338	2.13636	1.64244	2.6496	0	0	0	3.50757	0	0	0	0	3.79966	0	0	3.93241	0	0	0	0	0	0	0	0	0	0	0	0	0	0	0	0	0	0
PB.32588.105	Srpk1	Srpk1-S-105	NIC	0	2.04954	0	0	0	0	0	0	0	0	0	0	2.04338	0	0	0	0	0	0	0	0	0	0	0	0	0	0	0	0	0	0	3.31925	3.77792	3.24901	0	0	0	0	3.11123	2.95272	0	0	0	0	0	0
PB.55839.60	Dnajc2	Dnajc2-S-60	ISM	3.12744	3.05837	2.11911	2.16213	3.3289	2.58199	2.09948	2.68196	0	0	3.49177	3.95302	3.05164	0	2.60293	2.91945	0	3.01892	2.54223	0	0	0	0	0	0	2.71216	0	0	0	0	0	0	0	3.24901	0	0	0	0	0	0	0	0	0	0	0	0
PB.67447.67	Mphosph10	Mphosph10-S-67	ISM	0	2.04954	0	0	0	0	0	0	0	0	0	0	2.04338	2.76866	2.23382	2.6496	0	0	0	0	0	0	0	0	0	0	0	0	0	0	0	0	0	0	0	0	0	0	0	0	0	0	0	0	0	0
PB.38017.119	Mark2	Mark2-S-119	ISM	0	2.04954	0	0	0	0	0	0	0	0	0	1.80981	0	2.13636	1.64244	2.6496	0	0	0	0	0	0	0	0	0	0	0	0	0	0	0	0	0	0	0	0	0	0	0	0	0	0	0	0	0	0
PB.18166.27	Papola	Papola-S-27	FSM	0	0	0	0	0	0	0	0	0	0	0	0	0	0	0	0	0	0	0	0	0	0	0	0	0	0	0	0	0	0	0	3.31925	0	0	0	0	0	0	0	0	0	0	0	0	0	0
PB.67944.2	Whamm	Whamm-S-2	ISM	0	0	0	0	0	0	2.09948	0	0	0	0	1.80981	2.66954	0	1.64244	0	0	0	1.92483	0	0	0	0	0	0	0	0	0	0	0	0	0	0	0	0	0	0	0	0	0	0	0	0	0	0	0
PB.4200.21	Fam20b	Fam20b-S-21	ISM	0	0	0	0	0	0	0	0	0	0	0	0	0	0	0	0	0	0	0	0	0	0	0	0	0	0	0	0	0	0	0	0	3.10739	0	0	0	3.11271	0	3.11123	0	0	0	3.6987	0	0	0
PB.21227.1	Ttc37	Ttc37-S-1	ISM	0	0	2.11911	0	0	0	0	0	0	0	1.99726	1.80981	2.04338	0	1.64244	3.30676	1.57395	2.01354	0	0	0	0	0	0	0	0	0	0	0	0	0	0	0	0	0	0	0	0	0	0	0	0	0	0	0	0
PB.64532.185	E330021D16Rik	E330021D16Rik-S-185	FSM	4.54027	4.48792	4.08749	4.00418	4.15551	3.77922	3.78354	2.055	3.49252	2.1791	4.75047	4.47572	5.1294	4.65928	4.2746	4.48476	3.00213	3.01892	2.54223	2.84395	0	0	0	0	3.40532	0	2.80904	2.87225	0	0	0	0	0	0	0	0	0	0	0	0	0	0	0	0	0	0
PB.58518.29	Chek2	Chek2-S-29	NIC	0	0	0	0	0	0	0	0	0	0	0	0	0	0	0	0	0	0	0	0	0	0	0	0	0	0	0	0	0	0	0	0	0	0	0	0	0	0	0	0	0	0	0	0	0	0
PB.14679.5	Atp5h	Atp5h-S-5	NIC	0	0	0	0	0	0	0	0	0	0	0	0	0	0	0	0	1.57395	0	0	0	0	3.43962	0	0	2.74483	2.71216	0	0	0	0	0	0	3.10739	4.3214	3.80123	0	4.18122	0	0	2.95272	0	4.12752	0	0	0	0
PB.38395.52	Vps13a	Vps13a-S-52	ISM	1.86468	0	2.75031	0	0	0	0	0	0	0	1.99726	0	0	2.13636	1.64244	0	0	2.01354	0	0	0	0	0	0	0	0	0	0	0	0	0	0	0	0	0	0	0	0	0	0	0	0	0	0	0	0
PB.65419.226	Obox1	Obox1-S-226	NNC	0	0	0	0	0	0	2.09948	0	0	0	0	0	0	0	1.64244	0	0	0	1.92483	2.84395	0	0	2.97402	0	0	0	0	0	0	0	0	0	0	0	0	0	0	0	0	0	0	0	0	0	0	0
PB.48472.3	Txnip	Txnip-S-3	ISM	0	3.72776	3.13424	0	0	2.58199	0	0	0	0	2.62014	3.60454	4.00247	3.82454	2.23382	3.58524	0	0	0	0	0	0	0	0	0	0	0	0	0	0	0	0	0	0	0	0	0	0	0	0	0	0	0	0	0	0
PB.33689.33	Ccnd3	Ccnd3-S-33	FSM	0	0	0	0	0	0	0	0	0	0	0	0	0	0	0	0	0	0	0	0	0	0	0	0	0	0	0	0	0	0	0	0	0	0	0	0	0	0	0	0	0	0	0	0	0	0
PB.74348.4	Kbtbd3	Kbtbd3-S-4	FSM	0	0	0	0	0	0	0	0	0	0	0	0	0	0	0	0	0	0	0	0	0	0	0	0	0	0	0	0	0	0	0	0	0	0	0	0	0	0	0	0	3.88458	0	0	0	0	0
PB.58761.14	Dynll1	Dynll1-S-14	NNC	0	0	0	0	0	0	0	0	0	0	0	0	0	0	0	0	0	0	0	0	0	0	0	0	2.74483	0	0	0	0	0	3.01019	0	3.10739	0	0	0	3.11271	0	0	4.01592	3.88458	0	0	0	0	0
PB.7043.25	Ppa1	Ppa1-S-25	ISM	2.47719	0	2.11911	0	0	0	0	0	0	0	0	0	2.04338	2.76866	1.64244	0	0	0	0	0	0	0	0	0	0	0	0	0	0	0	0	0	0	0	0	0	0	0	0	0	0	0	0	0	0	0
PB.49933.481	Nexn	Nexn-S-481	NIC	0	0	0	0	2.94119	1.96174	0	0	0	0	0	1.80981	2.04338	2.76866	2.23382	1.6832	0	2.63759	2.54223	0	0	3.43962	0	0	0	0	0	0	0	0	0	0	0	0	0	0	0	0	0	0	0	0	0	0	0	0
PB.74668.10	Chordc1	Chordc1-S-10	FSM	0	0	2.75031	2.16213	0	1.96174	0	2.055	0	0	1.99726	0	0	0	0	2.27886	0	2.01354	0	0	0	0	0	0	2.74483	0	0	0	0	0	0	0	0	0	0	0	0	0	0	0	0	0	0	0	0	0
PB.17446.89	Rbm25	Rbm25-S-89	NIC	0	0	0	0	2.2995	0	0	0	0	0	2.62014	1.80981	0	0	2.23382	1.6832	0	2.01354	0	0	0	0	0	0	0	0	0	0	0	0	0	0	0	0	0	0	0	0	0	0	0	0	0	0	0	0
PB.75523.7	Trappc4	Trappc4-S-7	NIC	0	0	0	0	0	0	0	0	0	0	0	0	0	0	0	0	0	0	0	0	2.99065	0	0	0	0	0	0	0	3.94143	0	0	0	0	0	3.13018	0	0	2.96822	0	2.95272	0	0	0	0	0	0
PB.77149.4	Ibtk	Ibtk-S-4	ISM	0	2.04954	0	0	0	2.96193	2.09948	2.68196	0	2.1791	0	1.80981	2.04338	0	0	1.6832	0	2.01354	1.92483	3.50757	0	0	2.97402	0	0	0	0	0	0	0	0	0	0	0	0	0	0	0	0	0	0	0	0	0	0	0
PB.15685.33	Gm49371	Gm49371-S-33	ISM	1.86468	2.04954	2.11911	0	0	1.96174	0	0	2.82934	0	1.99726	3.06512	3.32743	0	2.87192	1.6832	2.15772	0	0	3.50757	3.65835	4.80156	4.54172	3.04884	0	0	2.80904	2.87225	3.94143	0	0	0	0	0	0	0	0	0	0	0	0	0	0	0	0	0
PB.54823.615	Zfp982	Zfp982-S-615	NNC	0	0	0	0	0	0	0	0	0	0	0	0	0	0	0	0	0	0	0	0	0	0	0	0	0	0	0	0	0	0	0	0	0	0	0	0	0	0	0	0	0	0	0	0	0	0
PB.958.63	Eif5b	Eif5b-S-63	ISM	0	0	0	0	2.2995	2.58199	0	0	0	0	3.00104	1.80981	0	0	0	2.91945	0	2.01354	0	0	0	0	2.97402	0	0	0	0	0	0	0	0	0	0	0	0	0	0	0	0	0	0	0	0	0	0	0
PB.31777.122	Wtap	Wtap-S-122	FSM	0	0	0	0	0	0	0	2.055	0	0	1.99726	2.41757	0	0	0	2.27886	0	2.01354	0	0	0	0	0	0	0	0	0	0	0	0	0	0	0	0	0	0	0	0	0	0	0	0	0	0	0	0
PB.10375.210	Usp34	Usp34-S-210	ISM	0	0	0	0	0	0	0	0	0	0	0	0	2.04338	0	0	0	0	0	0	2.84395	2.99065	3.43962	0	0	2.74483	0	0	0	0	0	0	0	0	0	3.13018	0	0	0	0	0	0	0	0	0	0	0
PB.62603.22	Immt	Immt-S-22	ISM	0	0	2.75031	0	0	0	0	0	2.19357	0	0	0	0	0	0	1.6832	1.57395	0	1.92483	0	0	0	0	0	0	0	0	0	0	0	0	0	0	0	0	0	0	0	0	0	0	0	0	0	0	0
PB.14302.62	Ccdc47	Ccdc47-S-62	ISM	3.34178	3.72776	2.75031	3.18091	0	2.58199	2.09948	3.73388	2.19357	3.47672	2.62014	1.80981	2.66954	2.13636	2.60293	2.27886	3.17614	3.68734	3.98315	0	0	0	0	3.04884	0	2.71216	3.86665	2.87225	0	0	0	0	0	0	0	0	0	0	0	0	0	0	0	0	0	0
PB.9732.2	Sf3a1	Sf3a1-S-2	ISM	0	2.67612	2.75031	0	2.2995	0	0	2.055	2.19357	0	3.00104	3.95302	3.05164	2.13636	3.65091	2.27886	1.57395	0	1.92483	0	0	0	0	0	0	2.71216	0	2.87225	0	0	0	0	0	0	0	0	0	0	0	0	0	0	0	0	0	0
PB.33237.169	Abcf1	Abcf1-S-169	ISM	0	2.04954	2.11911	0	2.2995	1.96174	0	0	0	0	0	2.79287	2.04338	2.13636	0	3.45567	1.57395	2.01354	1.92483	0	0	0	0	0	0	0	0	0	0	0	0	3.31925	0	0	0	0	0	0	0	0	0	0	0	0	0	0
PB.63068.1004	D6Ertd527e	D6Ertd527e-S-1004	NNC	1.86468	0	0	2.16213	0	1.96174	0	2.055	2.19357	2.1791	0	1.80981	0	2.13636	0	0	1.57395	2.01354	0	0	0	0	0	0	0	2.71216	0	2.87225	0	0	0	0	0	0	0	0	0	0	0	0	0	0	0	0	0	0
PB.4855.3	Cnst	Cnst-S-3	FSM	0	0	0	0	0	0	0	0	0	0	0	0	0	0	0	0	0	0	0	0	0	0	0	0	0	0	0	0	0	0	0	0	3.10739	0	4.19922	3.47019	3.78336	2.96822	3.11123	2.95272	0	0	0	0	0	5.554
PB.2712.106	Hdlbp	Hdlbp-S-106	ISM	2.85426	2.67612	2.75031	0	0	0	0	0	2.19357	0	0	2.41757	2.04338	2.13636	0	3.13174	2.15772	0	2.54223	0	0	0	0	0	0	0	0	0	0	0	0	0	0	0	0	0	0	0	0	0	0	0	0	0	0	0
PB.38237.231	Oosp1	Oosp1-S-231	ISM	0	0	0	2.16213	0	1.96174	0	0	0	0	0	1.80981	2.66954	0	2.23382	0	1.57395	0	0	0	0	0	0	0	0	0	0	0	0	0	0	0	0	0	0	0	0	0	0	0	0	0	0	0	0	0
PB.7845.6	Timm13	Timm13-S-6	FSM	0	0	0	0	0	0	0	0	0	0	0	0	0	0	0	0	0	0	0	0	0	0	0	0	0	0	0	0	0	0	0	0	0	3.24901	0	0	0	0	0	2.95272	0	0	0	0	0	0
PB.12079.93	Pfn1	Pfn1-S-93	NNC	1.86468	2.04954	0	0	0	0	0	0	0	0	2.62014	3.06512	0	0	2.23382	0	2.15772	0	0	0	2.99065	0	0	0	2.74483	0	0	3.5367	3.94143	0	0	0	0	3.24901	0	0	0	0	0	0	0	0	0	0	0	0
PB.44300.4	Insm1	Insm1-S-4	FSM	4.27528	4.3229	4.08749	3.67498	3.3289	4.02545	4.18139	4.63572	4.17034	4.27033	4.06593	2.41757	4.22195	3.97556	3.93208	3.69994	3.32431	3.29432	4.41831	4.18562	3.65835	4.80156	4.32124	4.39892	4.30149	5.13427	4.83432	4.21519	3.94143	0	0	0	0	0	0	0	0	0	3.78185	0	0	0	0	0	0	0
PB.33516.490	Hsp90ab1	Hsp90ab1-S-490	ISM	4.1964	4.22892	4.08749	3.85307	4.50747	3.9099	3.38938	3.34029	3.49252	0	4.34932	4.04659	4.68644	4.32659	4.38436	4.43406	3.32431	3.83791	3.41016	0	2.99065	0	0	0	2.74483	0	3.4716	3.5367	0	0	0	0	0	0	0	0	0	0	0	0	0	0	0	0	0	0
PB.68322.23	Uvrag	Uvrag-S-23	ISM	0	3.33425	2.11911	0	2.94119	2.58199	0	2.055	3.21493	0	1.99726	0	3.32743	2.76866	1.64244	2.27886	2.15772	3.01892	0	0	0	0	0	0	2.74483	0	0	0	0	0	0	0	0	0	0	0	0	0	0	0	0	0	0	0	0	0
PB.43746.7	Blvra	Blvra-S-7	NIC	2.47719	0	3.13424	2.16213	0	1.96174	0	0	0	2.1791	0	0	0	0	1.64244	0	1.57395	2.01354	0	2.84395	0	0	0	0	0	0	0	0	0	0	0	0	0	0	0	0	0	0	0	0	0	0	0	0	0	0
PB.66248.1	Paf1	Paf1-S-1	ISM	1.86468	2.04954	0	0	0	0	0	0	0	0	2.62014	1.80981	2.66954	0	0	1.6832	0	0	0	0	0	0	0	0	0	0	0	0	0	0	0	0	0	0	0	0	0	0	0	0	0	0	0	0	0	0
PB.12390.2	Fam57a	Fam57a-S-2	NNC	1.86468	0	0	0	0	0	0	2.055	0	2.1791	1.99726	0	0	0	0	0	2.15772	0	0	0	0	0	0	0	0	0	0	2.87225	0	0	0	0	3.77792	0	0	0	0	0	0	0	0	4.12752	0	0	0	0
PB.39757.2	Pdcd4	Pdcd4-S-2	ISM	0	0	2.11911	0	2.2995	0	0	0	0	0	2.62014	1.80981	2.04338	2.13636	0	0	0	0	0	0	0	0	0	0	0	0	0	0	0	0	0	0	0	0	0	0	0	0	0	0	0	0	0	0	0	0
PB.42181.5	Cdca7	Cdca7-S-5	ISM	2.47719	3.33425	0	2.16213	2.2995	0	0	0	0	0	2.62014	0	2.66954	0	2.23382	2.6496	1.57395	2.01354	1.92483	0	0	0	0	0	0	0	0	0	0	0	0	0	0	0	0	0	0	0	0	0	0	0	0	0	0	0
PB.76244.423	Kif23	Kif23-S-423	ISM	0	0	2.75031	0	2.2995	1.96174	0	0	0	0	0	1.80981	0	0	0	1.6832	0	0	0	0	0	0	0	0	0	0	0	0	0	0	0	0	0	0	0	0	0	0	0	0	0	0	0	0	0	0
PB.45537.127	Pfdn4	Pfdn4-S-127	NNC	1.86468	2.67612	0	2.16213	0	0	2.09948	2.055	0	0	0	0	3.05164	0	2.23382	0	0	0	0	2.84395	3.65835	0	0	0	0	0	4.14909	0	0	0	0	0	0	0	0	0	0	0	0	0	0	0	0	0	0	0
PB.23951.8	Rnf17	Rnf17-S-8	ISM	0	2.04954	0	0	0	1.96174	0	0	0	0	1.99726	1.80981	0	0	1.64244	2.91945	1.57395	0	0	0	0	0	0	0	0	0	0	0	0	0	0	0	0	0	0	0	0	0	0	0	0	0	0	0	0	0
PB.10170.32	Etaa1	Etaa1-S-32	ISM	0	0	0	0	2.2995	0	0	0	0	0	1.99726	0	2.04338	2.13636	0	1.6832	0	3.01892	0	0	0	0	0	0	0	0	0	0	0	0	0	0	0	0	0	0	0	0	0	0	0	0	0	0	0	0
PB.71645.41	Hmgb2	Hmgb2-S-41	ISM	1.86468	0	2.11911	0	0	1.96174	0	0	0	0	1.99726	1.80981	0	3.15298	0	1.6832	0	0	0	2.84395	0	0	0	0	0	0	0	0	0	0	0	0	0	0	0	0	0	0	0	0	0	0	0	0	0	0
PB.12870.2	Ddx52	Ddx52-S-2	ISM	0	0	2.11911	0	2.94119	0	0	0	0	0	0	0	3.05164	0	1.64244	2.91945	1.57395	0	0	0	0	0	0	0	0	0	0	0	0	0	0	0	0	0	0	0	0	0	0	0	0	0	0	0	0	0
PB.55060.32	Eno1	Eno1-S-32	FSM	0	2.04954	0	0	0	0	2.09948	0	2.19357	0	0	0	0	0	0	2.6496	2.15772	0	0	0	3.65835	0	0	0	0	0	0	0	4.62482	0	0	0	0	0	0	0	3.11271	3.63534	0	0	0	0	0	0	0	0
PB.35592.4	Zfp35	Zfp35-S-4	FSM	0	0	0	0	0	0	0	0	0	0	0	0	0	0	0	0	0	0	0	2.84395	0	0	0	0	0	0	0	0	0	0	0	0	0	0	0	0	0	0	0	0	0	0	0	0	0	0
PB.43799.87	Bub1	Bub1-S-87	ISM	2.47719	0	2.11911	0	0	1.96174	0	0	0	0	0	1.80981	2.04338	3.97556	0	3.13174	0	2.01354	0	0	0	0	0	0	0	0	0	0	0	0	0	0	0	0	0	0	0	0	0	0	0	0	0	0	0	0
PB.52920.187	Nasp	Nasp-S-187	ISM	0	2.04954	0	0	0	0	0	0	0	0	0	2.41757	2.04338	0	2.23382	2.27886	0	0	1.92483	0	0	0	0	0	0	0	0	0	0	0	0	0	0	0	0	0	0	0	0	0	0	0	0	0	0	0
PB.28982.282	Rsl1d1	Rsl1d1-S-282	ISM	2.47719	0	2.75031	0	2.94119	0	0	0	0	0	3.27621	2.41757	3.54337	2.76866	3.25834	3.98142	2.15772	0	1.92483	0	0	0	0	0	0	0	0	0	0	0	0	0	0	0	0	0	0	0	0	0	0	0	0	0	0	0
PB.67447.71	Mphosph10	Mphosph10-S-71	FSM	4.65037	4.91476	4.48734	3.45816	4.76728	4.02545	3.60575	2.68196	2.82934	2.1791	5.03599	4.97023	5.57196	5.10782	4.83654	5.74357	2.52389	4.82274	4.18043	0	0	0	0	0	3.40532	0	0	0	0	0	0	0	0	0	0	0	0	0	0	3.61942	0	0	0	0	0	0
PB.15597.16	Nol10	Nol10-S-16	ISM	1.86468	2.67612	0	0	2.94119	0	0	0	0	0	0	1.80981	0	0	2.23382	1.6832	0	2.01354	1.92483	0	0	0	0	0	0	0	0	0	0	0	0	0	0	0	0	0	0	0	0	0	0	0	0	0	0	0
PB.3265.10	Ubxn4	Ubxn4-S-10	NIC	0	0	2.75031	2.16213	0	0	0	0	0	0	1.99726	1.80981	0	2.13636	0	2.27886	0	0	0	0	0	0	0	0	0	0	0	0	0	0	0	0	0	0	0	0	0	0	0	0	0	0	0	0	0	0
PB.62211.1	Plekha8	Plekha8-S-1	ISM	0	2.04954	2.11911	0	2.2995	0	0	0	0	0	0	2.79287	0	2.76866	0	0	1.57395	0	0	0	0	0	0	0	0	0	0	0	0	0	0	0	0	0	0	0	0	0	0	0	0	0	0	0	0	0
PB.13729.13	Grb7	Grb7-S-13	ISM	0	0	0	0	0	0	0	0	2.19357	0	0	1.80981	0	0	1.64244	0	1.57395	2.63759	0	0	0	0	0	0	0	0	0	0	0	0	0	0	0	0	0	0	0	0	0	0	0	0	0	0	0	0
PB.23556.43	Ktn1	Ktn1-S-43	ISM	1.86468	0	2.11911	0	0	1.96174	0	0	2.19357	0	0	2.41757	3.05164	3.64657	2.23382	2.6496	0	2.63759	0	2.84395	0	0	0	0	0	0	2.80904	0	0	0	0	0	0	0	0	0	0	0	0	0	0	0	0	0	0	0
PB.19045.8	Psma2	Psma2-S-8	ISM	1.86468	0	2.11911	0	2.2995	1.96174	0	0	0	2.1791	1.99726	2.41757	2.66954	3.15298	1.64244	2.27886	1.57395	2.63759	1.92483	0	0	0	0	3.04884	2.74483	0	0	0	0	0	0	0	0	0	0	0	0	0	0	0	0	0	0	0	0	0
PB.24046.20	Sap18	Sap18-S-20	FSM	0	0	0	0	0	0	0	0	0	0	0	2.41757	0	2.76866	0	2.6496	1.57395	0	0	0	2.99065	3.43962	2.97402	0	2.74483	0	0	2.87225	0	0	0	0	0	0	0	0	0	0	0	0	0	0	0	0	0	0
PB.43836.42	Zc3h6	Zc3h6-S-42	NNC	0	0	2.11911	0	2.2995	0	0	0	0	0	1.99726	1.80981	3.32743	2.13636	0	2.6496	0	0	0	0	0	0	0	0	0	0	0	0	0	0	0	0	0	0	0	0	0	0	0	0	0	0	0	0	0	0
PB.55337.6	Cdk11b	Cdk11b-S-6	NIC	0	0	0	0	0	0	0	0	0	0	1.99726	0	2.04338	0	1.64244	0	0	2.01354	0	0	0	0	0	0	0	0	0	0	0	0	0	0	0	0	0	0	0	0	0	0	0	0	0	0	0	0
PB.53390.93	Meaf6	Meaf6-S-93	ISM	0	0	0	0	0	0	0	0	0	0	0	0	0	0	0	0	0	0	0	0	0	0	0	0	0	0	0	0	0	0	0	0	0	0	0	3.47019	0	0	0	0	0	0	0	0	0	0
PB.26109.126	Laptm4b	Laptm4b-S-126	ISM	2.85426	3.55023	2.75031	3.18091	3.60758	2.58199	2.72941	2.055	2.82934	3.19929	1.99726	1.80981	3.05164	3.64657	3.08368	3.13174	3.32431	3.29432	1.92483	3.50757	0	0	0	0	2.74483	3.37154	0	3.5367	0	0	3.67839	0	0	0	0	0	0	0	0	0	0	0	0	0	0	0
PB.42311.6	Hnrnpa3	Hnrnpa3-S-6	ISM	2.85426	2.67612	2.75031	0	2.2995	0	0	2.055	0	0	3.00104	1.80981	2.04338	0	0	2.6496	0	2.01354	0	0	0	0	0	0	2.74483	0	0	2.87225	0	0	0	0	0	0	0	0	0	0	0	0	0	0	0	0	0	0
PB.24476.68	Npm2	Npm2-S-68	ISM	2.47719	2.04954	3.80538	2.16213	2.2995	2.96193	0	0	2.82934	2.1791	2.62014	3.06512	3.54337	3.64657	3.75367	3.45567	1.57395	2.01354	1.92483	3.50757	0	0	2.97402	4.11533	3.79966	2.71216	2.80904	2.87225	0	0	3.01019	0	0	0	3.13018	0	0	0	0	2.95272	0	0	0	0	0	0
PB.82037.9	Rbbp7	Rbbp7-S-9	ISM	2.47719	3.55023	2.11911	0	2.2995	2.58199	0	0	0	0	2.62014	3.06512	3.54337	2.13636	3.08368	3.89611	0	2.01354	0	0	0	0	2.97402	0	2.74483	0	0	0	0	0	0	0	0	0	0	0	0	0	0	0	0	0	0	0	0	0
PB.35121.153	Arhgap12	Arhgap12-S-153	ISM	3.34178	0	0	0	0	3.45185	0	2.055	2.19357	0	3.00104	2.79287	0	0	2.87192	1.6832	1.57395	0	3.41016	2.84395	0	0	2.97402	0	0	2.71216	0	0	0	0	0	0	0	3.24901	0	0	0	2.96822	0	0	0	0	0	0	0	0
PB.48009.30	Rusc1	Rusc1-S-30	NNC	0	0	0	0	0	0	0	0	0	0	0	0	0	0	0	0	0	0	0	0	0	0	0	0	0	0	0	0	0	0	0	0	0	0	0	0	0	2.96822	3.11123	0	0	0	0	0	0	0
PB.42036.15	Ppig	Ppig-S-15	NIC	1.86468	0	0	0	0	0	0	0	0	0	0	1.80981	2.66954	2.13636	1.64244	2.91945	0	0	0	0	0	0	0	0	0	0	0	0	0	0	0	0	0	0	0	0	0	0	0	0	0	0	0	0	0	0
PB.26109.128	Laptm4b	Laptm4b-S-128	ISM	3.51819	3.55023	3.13424	3.18091	3.82529	2.96193	3.60575	3.34029	2.82934	2.1791	3.00104	2.79287	3.05164	3.15298	2.60293	2.91945	2.79133	3.68734	3.19524	2.84395	3.65835	0	3.64129	4.61961	0	3.7655	0	0	0	0	0	0	0	0	0	0	0	0	0	0	0	0	0	0	0	0
PB.19633.7	Prpf4b	Prpf4b-S-7	FSM	0	0	0	0	0	2.58199	0	0	0	0	2.62014	1.80981	0	0	0	0	1.57395	2.01354	0	0	0	0	0	0	0	0	0	0	0	0	0	0	0	0	0	0	0	0	0	0	0	0	0	0	0	0
PB.5183.143	Cenpf	Cenpf-S-143	ISM	1.86468	4.12518	2.75031	2.16213	3.82529	0	0	0	0	0	3.00104	3.60454	3.32743	3.42993	3.40699	2.27886	1.57395	3.01892	1.92483	2.84395	0	0	0	0	0	0	0	0	0	0	0	0	0	0	0	0	0	0	0	0	0	4.12752	0	0	0	0
PB.41137.32	Nup214	Nup214-S-32	ISM	0	0	0	0	0	0	0	0	0	0	1.99726	0	2.66954	0	1.64244	1.6832	0	0	0	2.84395	0	0	0	0	0	2.71216	0	2.87225	3.94143	0	0	0	0	0	0	0	0	0	0	0	0	0	0	0	0	0
PB.2333.270	A530040E14Rik	A530040E14Rik-S-270	ISM	2.47719	2.04954	2.11911	0	2.94119	2.58199	2.72941	2.055	0	2.1791	0	3.06512	0	2.13636	1.64244	0	2.15772	3.01892	0	3.50757	0	0	0	0	0	2.71216	0	0	0	0	0	0	0	0	0	0	0	0	0	0	0	0	0	0	0	0
PB.75120.4	Nfrkb	Nfrkb-S-4	ISM	0	2.04954	0	0	2.2995	1.96174	2.09948	0	0	0	1.99726	2.41757	2.66954	2.13636	3.08368	3.30676	0	2.01354	1.92483	0	0	0	0	0	0	0	0	0	0	0	0	0	0	0	0	0	0	0	0	0	0	0	0	0	0	0
PB.11272.54	Gpx3	Gpx3-S-54	ISM	0	2.67612	2.11911	0	0	0	0	2.68196	0	0	0	1.80981	0	0	0	0	0	2.01354	0	0	0	0	0	0	0	0	0	0	0	0	0	0	0	0	0	0	3.11271	2.96822	0	0	0	0	0	0	0	0
PB.49929.172	Dnajb4	Dnajb4-S-172	ISM	0	2.04954	0	0	0	0	0	2.055	0	0	0	0	3.54337	2.13636	2.60293	0	0	2.01354	0	0	0	0	0	0	2.74483	0	0	0	0	0	0	0	0	0	0	0	0	0	0	0	0	0	0	0	0	0
PB.18116.89	Dicer1	Dicer1-S-89	NNC	2.47719	2.04954	3.13424	0	0	0	0	0	0	0	1.99726	3.06512	2.66954	0	0	1.6832	0	0	1.92483	0	0	0	0	0	2.74483	0	0	0	0	0	0	0	0	0	0	0	0	0	0	0	0	0	0	0	0	0
PB.47496.68	Smc4	Smc4-S-68	ISM	0	2.04954	0	0	0	0	0	0	0	0	1.99726	0	2.04338	0	0	1.6832	0	0	0	0	0	0	0	0	0	0	0	0	0	0	3.01019	0	0	0	0	0	0	0	0	0	0	0	0	0	0	0
PB.45820.2	Gm14406	Gm14406-S-2	FSM	0	0	0	0	0	0	0	0	0	0	0	0	0	0	0	0	0	0	0	0	0	0	0	0	0	0	0	0	0	0	0	0	0	0	0	0	0	0	0	0	0	0	0	0	0	0
PB.76577.3	Tln2	Tln2-S-3	ISM	1.86468	2.04954	2.11911	0	0	0	0	0	0	0	0	0	0	0	0	1.6832	0	0	0	0	0	0	0	0	0	0	0	2.87225	0	0	0	0	0	0	0	0	0	0	0	0	0	0	0	0	0	0
PB.3147.2	3110009E18Rik	3110009E18Rik-S-2	FSM	3.51819	3.05837	3.13424	3.18091	3.3289	2.96193	2.72941	0	4.03901	0	0	0	0	3.42993	1.64244	1.6832	2.15772	3.01892	2.54223	0	0	0	0	0	0	0	0	0	0	0	0	3.31925	0	0	0	0	0	0	0	0	0	0	0	3.88715	4.19825	0
PB.12407.21	Nxn	Nxn-S-21	NNC	0	0	2.11911	2.16213	2.2995	0	0	2.68196	0	0	2.62014	0	0	0	0	0	0	0	0	0	0	0	0	0	0	0	0	0	0	0	0	0	0	0	0	0	0	0	0	0	0	0	0	0	0	0
PB.64990.8	Cnot3	Cnot3-S-8	ISM	0	0	0	0	2.2995	0	0	0	0	0	1.99726	0	2.66954	0	1.64244	2.6496	0	0	0	2.84395	0	0	0	0	0	0	0	2.87225	0	0	0	0	0	0	0	0	0	0	0	0	0	0	0	0	0	0
PB.39840.258	Ccdc186	Ccdc186-S-258	ISM	3.79843	3.87847	3.80538	0	3.82529	3.45185	2.09948	2.68196	0	0	4.16958	4.85773	4.55422	4.85177	3.75367	4.48476	3.17614	4.28203	3.73715	0	0	0	0	0	2.74483	0	0	0	4.62482	0	0	0	0	0	0	0	0	0	0	0	0	0	0	0	0	0
PB.15685.34	Gm49371	Gm49371-S-34	ISM	0	0	0	0	0	0	0	0	0	0	1.99726	0	0	0	2.23382	1.6832	0	0	0	0	4.05518	0	0	0	2.74483	0	0	0	3.94143	0	0	0	0	0	3.13018	0	0	0	0	0	0	0	0	0	0	0
PB.46424.5	Tbl1xr1	Tbl1xr1-S-5	ISM	1.86468	0	2.11911	0	2.2995	2.58199	0	0	0	0	2.62014	1.80981	2.04338	0	1.64244	1.6832	1.57395	0	0	0	0	0	0	0	0	0	0	0	0	0	0	0	0	0	0	0	0	0	0	0	0	0	0	0	0	0
PB.77777.238	Atp2c1	Atp2c1-S-238	NIC	0	0	0	0	0	0	0	0	0	0	0	0	0	0	1.64244	0	0	0	0	2.84395	0	0	3.64129	3.04884	0	2.71216	0	0	0	0	0	0	0	0	0	0	0	0	0	0	0	0	0	0	0	0
PB.53342.56	Utp11	Utp11-S-56	ISM	1.86468	0	2.11911	0	2.2995	0	0	0	0	0	0	1.80981	2.04338	2.13636	0	1.6832	1.57395	0	0	0	0	0	0	0	0	0	0	0	0	0	0	0	0	0	0	0	0	0	0	0	0	0	0	0	0	0
PB.69489.54	Tial1	Tial1-S-54	ISM	1.86468	2.04954	0	0	0	1.96174	2.09948	0	2.82934	2.1791	0	1.80981	2.04338	0	0	0	1.57395	0	0	0	0	0	0	0	0	0	0	0	0	0	3.01019	0	3.10739	0	3.13018	0	0	0	0	0	0	0	0	0	0	0
PB.16033.25	Lamb1	Lamb1-S-25	NNC	0	0	2.11911	0	0	0	0	0	0	0	0	0	0	2.13636	1.64244	2.27886	0	0	0	0	2.99065	0	0	0	0	0	0	2.87225	0	0	0	0	0	0	0	0	0	0	0	0	0	0	0	0	0	0
PB.24376.43	Cdca2	Cdca2-S-43	ISM	0	0	2.11911	0	0	1.96174	0	0	0	2.1791	0	0	0	0	0	2.27886	0	3.29432	1.92483	0	0	0	0	0	0	0	0	0	0	0	0	0	0	0	0	0	0	0	0	0	0	0	0	0	0	0
PB.64165.27	Usp5	Usp5-S-27	ISM	0	0	0	0	0	0	0	0	0	0	0	0	0	0	0	0	0	0	0	0	0	0	0	0	0	0	0	0	0	0	0	0	0	0	0	0	0	0	0	2.95272	0	0	0	0	0	0
PB.34940.1	Foxn2	Foxn2-S-1	ISM	0	0	0	0	2.2995	0	0	0	0	0	1.99726	0	0	0	0	0	0	0	0	2.84395	0	0	0	0	0	0	0	0	0	0	0	0	0	0	0	0	0	2.96822	0	0	0	0	0	0	0	0
PB.78794.125	Bmp15	Bmp15-S-125	FSM	0	0	0	0	0	0	0	0	0	0	0	1.80981	3.05164	0	0	2.6496	0	0	0	2.84395	4.05518	3.43962	2.97402	3.04884	3.40532	2.71216	3.4716	3.5367	0	0	0	0	0	0	0	0	0	0	0	0	0	0	0	0	0	0
PB.74767.102	Dnmt1	Dnmt1-S-102	NIC	0	0	0	0	0	0	0	0	0	0	0	0	0	0	3.08368	0	0	0	0	3.50757	2.99065	0	0	0	2.74483	0	2.80904	2.87225	0	0	0	0	0	0	0	0	0	0	0	0	0	0	0	0	0	0
PB.36397.12	Eno1b	Eno1b-S-12	FSM	0	0	0	0	0	1.96174	0	0	0	0	0	0	0	0	0	1.6832	0	0	0	0	0	0	2.97402	0	0	0	0	0	0	0	0	0	0	0	0	0	0	0	0	0	0	0	0	0	0	0
PB.39147.4	Hells	Hells-S-4	ISM	1.86468	3.05837	0	0	3.3289	2.58199	0	0	0	0	0	0	0	2.76866	2.23382	2.6496	0	0	1.92483	0	0	0	0	0	0	0	0	0	0	0	0	0	0	0	0	0	0	0	0	0	0	0	0	0	0	0
PB.75843.285	Cul5	Cul5-S-285	NIC	0	0	0	0	0	0	0	0	0	0	0	0	0	0	1.64244	2.6496	0	0	0	0	0	3.43962	2.97402	0	2.74483	0	0	0	0	0	0	0	0	0	0	0	0	0	0	0	0	0	0	0	0	0
PB.49933.445	Nexn	Nexn-S-445	NIC	0	0	0	0	0	0	2.09948	0	0	0	0	0	0	0	1.64244	2.27886	0	3.29432	1.92483	0	0	0	0	0	2.74483	0	0	0	0	0	0	0	0	0	0	0	0	0	0	0	0	0	0	0	0	0
PB.31206.7	Son	Son-S-7	ISM	5.65109	5.17542	5.42951	4.61477	5.95758	4.86249	4.68609	3.88461	4.9159	4.15429	5.76657	5.41968	5.00237	5.96452	4.80291	6.05474	5.298	5.635	4.66694	4.18562	0	4.1166	4.32124	3.04884	2.74483	4.26702	3.4716	4.43537	3.94143	5.78138	3.01019	4.89932	4.86117	3.92256	0	3.47019	3.78336	2.96822	3.78185	3.61942	0	0	0	0	4.88385	0
PB.20347.72	Cltb	Cltb-S-72	FSM	0	2.04954	0	0	0	1.96174	0	0	0	0	0	1.80981	0	2.13636	1.64244	1.6832	2.15772	0	0	0	0	0	0	0	0	0	0	0	0	0	0	0	0	0	0	0	0	0	0	0	0	0	0	0	0	0
PB.21938.70	Srek1	Srek1-S-70	ISM	2.47719	3.05837	0	0	0	0	2.72941	0	0	0	1.99726	1.80981	2.04338	0	0	2.6496	1.57395	2.01354	0	0	0	0	0	0	0	0	0	0	0	0	0	0	0	0	0	0	0	0	0	0	0	0	0	0	0	0
PB.29439.8	Eef1akmt4	Eef1akmt4-S-8	FSM	0	0	0	0	0	0	0	0	0	0	0	0	0	0	0	0	0	0	0	0	0	0	0	0	0	0	0	0	0	0	0	0	0	0	3.13018	0	0	0	0	3.61942	0	0	0	0	0	0
PB.10512.27	Rps27a	Rps27a-S-27	NNC	0	0	0	0	0	0	0	0	0	0	0	0	0	0	0	0	0	0	0	0	0	0	0	0	0	0	0	0	0	0	0	0	0	0	0	0	0	0	0	0	0	0	0	0	0	0
PB.67842.4	Gdpgp1	Gdpgp1-S-4	FSM	0	0	0	0	0	1.96174	0	0	0	0	0	0	0	0	1.64244	0	0	0	0	0	0	0	0	0	0	0	0	0	0	0	0	3.31925	0	0	0	3.47019	0	0	0	0	0	0	0	0	0	0
PB.63217.5	Iqsec1	Iqsec1-S-5	FSM	1.86468	0	0	0	2.2995	0	2.09948	0	0	0	0	0	2.04338	0	2.23382	1.6832	0	0	0	0	0	3.43962	2.97402	3.04884	0	0	0	2.87225	3.94143	0	0	0	3.10739	0	0	0	0	0	3.11123	0	0	0	0	0	0	0
PB.13771.4	Cdc6	Cdc6-S-4	ISM	1.86468	0	2.75031	0	2.2995	0	0	0	0	0	0	0	0	0	1.64244	2.27886	0	0	0	0	0	0	0	0	0	0	0	0	0	0	0	0	0	0	0	0	0	0	0	0	0	0	0	0	0	0
PB.39101.10	Cep55	Cep55-S-10	NIC	0	2.04954	2.11911	0	2.2995	0	0	0	0	0	0	0	3.05164	2.13636	0	1.6832	0	0	0	0	0	0	0	0	0	0	0	0	0	0	0	0	0	0	0	0	0	0	0	0	0	0	0	0	0	0
PB.35745.2	Iws1	Iws1-S-2	ISM	0	2.04954	0	0	2.2995	0	0	0	0	0	0	1.80981	0	2.13636	2.23382	1.6832	0	3.01892	0	0	0	0	0	0	0	0	0	0	0	0	0	0	0	0	0	0	0	0	0	0	0	0	0	0	0	0
PB.82052.120	Txlng	Txlng-S-120	ISM	0	2.04954	0	0	0	0	0	0	0	0	0	0	2.04338	0	0	1.6832	1.57395	0	0	0	0	0	0	0	0	0	0	0	0	0	0	0	0	0	0	0	0	0	0	0	0	0	0	0	0	0
PB.17446.76	Rbm25	Rbm25-S-76	NIC	1.86468	2.67612	0	2.79601	2.2995	2.58199	0	0	0	0	3.00104	2.41757	3.05164	3.15298	2.23382	2.6496	0	2.63759	2.54223	0	0	0	0	0	0	0	0	0	0	0	0	0	0	0	0	0	0	0	0	0	0	0	0	0	0	0
PB.24459.26	Polr3d	Polr3d-S-26	ISM	0	2.04954	0	0	2.2995	0	0	0	0	0	0	0	2.66954	2.13636	0	1.6832	0	0	1.92483	0	0	0	0	0	0	0	0	0	0	0	0	0	0	0	0	0	0	0	0	0	0	0	0	0	0	0
PB.9388.3	Ddit3	Ddit3-S-3	FSM	0	0	2.11911	0	0	2.58199	0	0	0	0	3.00104	2.79287	2.04338	2.13636	2.23382	2.6496	0	0	0	0	0	0	2.97402	3.71799	0	0	0	2.87225	0	0	0	3.31925	0	0	0	0	0	0	0	0	0	0	0	0	0	0
PB.68241.2	Ndufc2	Ndufc2-S-2	ISM	0	0	0	0	2.2995	0	0	0	0	0	0	0	2.04338	0	0	1.6832	1.57395	0	0	0	0	0	0	0	0	0	0	0	0	0	0	0	0	0	0	0	0	0	0	0	0	0	0	0	0	0
PB.72619.26	Zfp423	Zfp423-S-26	ISM	0	2.04954	0	0	0	0	0	0	0	0	0	1.80981	0	0	0	0	2.52389	2.01354	0	0	0	0	0	0	2.74483	2.71216	0	0	0	0	0	0	0	0	0	0	0	0	0	0	0	0	0	0	0	0
PB.29892.3	Pcyt1a	Pcyt1a-S-3	ISM	0	0	2.11911	0	0	0	0	0	0	0	2.62014	1.80981	3.05164	2.76866	1.64244	1.6832	0	0	0	0	0	0	0	0	0	0	0	0	0	0	0	0	0	0	0	0	0	0	0	0	0	0	0	0	0	0
PB.13797.65	Smarce1	Smarce1-S-65	ISM	0	3.05837	2.11911	0	0	1.96174	0	0	0	0	2.62014	2.41757	3.05164	2.13636	1.64244	3.30676	0	0	1.92483	0	0	0	0	0	0	0	0	0	0	0	0	0	0	0	0	0	0	0	0	0	0	0	0	0	0	0
PB.43470.7	Haus2	Haus2-S-7	FSM	0	0	0	0	0	0	0	0	0	0	0	0	0	0	0	0	0	0	0	0	0	0	0	0	0	0	0	0	0	0	0	0	0	0	0	0	0	2.96822	0	0	0	0	0	0	0	0
PB.46136.307	Tpd52	Tpd52-S-307	ISM	0	0	0	0	0	0	0	0	0	0	0	0	2.04338	2.13636	0	0	0	2.01354	0	0	0	0	0	0	2.74483	0	0	2.87225	0	0	0	0	0	0	0	0	0	0	0	0	0	0	0	0	0	0
PB.9456.8	Naca	Naca-S-8	ISM	1.86468	0	4.08749	2.16213	2.94119	0	0	0	2.19357	0	2.62014	1.80981	2.04338	3.15298	2.23382	2.27886	0	0	0	0	0	0	2.97402	0	0	0	0	2.87225	0	0	0	0	0	0	0	0	0	0	0	0	0	0	0	0	0	0
PB.82093.69	Zrsr2	Zrsr2-S-69	FSM	0	0	0	0	0	1.96174	2.09948	0	0	2.1791	0	0	2.04338	2.13636	0	2.27886	0	2.01354	1.92483	0	0	0	0	0	0	0	0	0	0	0	0	0	0	0	0	0	0	0	0	0	0	0	0	0	0	0
PB.77428.33	Rnf7	Rnf7-S-33	FSM	0	0	0	0	0	0	0	0	0	0	0	0	0	0	0	0	0	0	0	0	0	0	0	0	0	0	0	0	0	0	0	0	3.77792	0	0	0	0	2.96822	3.11123	0	0	0	3.6987	0	0	0
PB.24989.25	Lmo7	Lmo7-S-25	NNC	0	2.04954	0	0	0	1.96174	0	0	0	0	1.99726	0	2.04338	2.13636	0	0	0	2.01354	0	0	0	0	0	0	0	0	0	2.87225	0	0	0	0	0	0	0	0	0	0	0	0	0	0	0	0	0	0
PB.61837.55	Nobox	Nobox-S-55	ISM	0	0	0	0	0	0	0	0	0	0	0	0	2.04338	0	1.64244	1.6832	2.52389	0	0	0	2.99065	0	0	0	0	0	2.80904	0	0	0	0	0	0	0	0	0	0	0	0	0	0	0	0	0	0	0
PB.24289.31	Fzd3	Fzd3-S-31	ISM	1.86468	2.04954	0	2.16213	0	0	2.09948	0	2.19357	0	1.99726	1.80981	0	2.13636	0	1.6832	1.57395	0	1.92483	0	0	0	0	0	0	0	0	0	0	0	0	0	0	0	3.13018	0	0	4.03197	0	0	0	0	0	0	0	0
PB.15974.83	Rps7	Rps7-S-83	ISM	0	3.05837	2.75031	0	0	0	0	0	0	0	1.99726	0	0	3.42993	0	1.6832	0	0	0	0	0	0	0	0	0	0	0	0	0	0	0	0	0	0	0	0	0	0	0	0	0	0	0	0	0	0
PB.55362.60	Ccnl2	Ccnl2-S-60	ISM	1.86468	2.04954	0	2.16213	3.3289	0	0	0	0	0	0	0	2.04338	2.76866	0	2.6496	0	2.01354	0	0	0	0	0	0	0	0	0	0	0	0	0	0	0	0	0	0	0	0	0	0	0	0	0	0	0	0
PB.53730.89	Zcchc17	Zcchc17-S-89	NIC	2.85426	2.04954	3.41098	0	0	2.58199	2.09948	0	0	0	2.62014	2.41757	3.05164	4.10675	1.64244	2.27886	1.57395	2.63759	1.92483	0	3.65835	0	0	0	2.74483	0	0	0	0	0	0	0	0	0	0	0	0	0	0	0	0	0	0	0	0	0
PB.25339.6	Tm9sf2	Tm9sf2-S-6	ISM	0	2.04954	0	0	0	1.96174	0	0	0	0	0	2.79287	2.04338	2.13636	0	1.6832	0	0	0	0	0	0	0	0	0	0	0	0	0	0	0	0	0	0	0	0	0	0	0	0	0	0	0	0	0	0
PB.12197.7	Itgae	Itgae-S-7	ISM	0	0	0	2.16213	0	0	0	0	0	0	0	1.80981	0	0	0	0	0	0	0	0	0	3.43962	0	0	0	0	0	0	0	0	3.01019	4.39345	0	0	0	0	0	3.63534	0	4.01592	0	0	0	3.88715	4.19825	6.24521
PB.63789.50	H1foo	H1foo-S-50	ISM	2.85426	3.05837	3.95635	2.16213	2.94119	0	0	0	0	0	3.27621	2.41757	3.72086	2.76866	1.64244	2.6496	1.57395	2.01354	1.92483	0	0	0	0	0	0	0	0	0	0	0	0	0	0	0	0	0	0	0	0	0	0	0	0	0	0	0
PB.42050.23	Ssb	Ssb-S-23	ISM	0	2.67612	3.13424	0	2.2995	1.96174	0	0	2.19357	0	0	2.79287	3.05164	0	0	3.98142	0	0	0	0	0	0	0	0	0	0	0	0	0	0	0	0	0	0	0	0	0	0	0	0	0	0	0	0	0	0
PB.77714.42	Cdv3	Cdv3-S-42	ISM	1.86468	2.04954	2.11911	0	0	0	2.09948	0	0	0	0	2.41757	0	0	0	0	0	2.01354	0	0	0	0	0	0	0	0	0	0	0	0	0	0	0	0	0	0	0	0	0	0	0	0	0	0	0	0
PB.68649.7	Nlrp14	Nlrp14-S-7	ISM	1.86468	0	0	0	0	0	0	0	0	0	0	1.80981	2.66954	0	2.60293	2.6496	0	0	0	0	0	0	0	0	0	0	0	0	0	0	0	0	0	0	0	0	0	0	0	0	0	0	0	0	0	0
PB.78659.1	Tmem158	Tmem158-S-1	FSM	0	0	0	0	0	0	0	0	0	0	0	0	0	0	0	0	1.57395	0	1.92483	0	0	0	0	0	0	0	0	0	0	0	0	0	3.10739	0	0	0	0	0	0	0	0	0	0	0	0	0
PB.11124.20	Skp1a	Skp1a-S-20	ISM	4.01708	3.33425	4.83234	2.16213	3.82529	2.58199	0	0	2.19357	0	4.56988	3.60454	4.11822	3.42993	3.65091	3.89611	0	0	0	0	0	0	2.97402	0	0	2.71216	2.80904	0	0	0	0	0	0	0	0	0	0	0	0	0	0	0	0	0	0	0
PB.18444.44	Eif5	Eif5-S-44	ISM	0	0	0	0	0	1.96174	0	0	0	0	1.99726	0	0	0	0	2.27886	0	2.01354	2.54223	0	0	0	0	0	0	0	0	0	0	0	0	0	0	0	0	0	0	0	0	0	0	0	0	0	0	0
PB.2271.24	Mff	Mff-S-24	FSM	0	0	0	0	0	0	0	0	0	0	0	1.80981	2.66954	0	1.64244	1.6832	0	0	0	0	0	0	2.97402	0	0	0	0	0	0	0	0	0	0	0	0	0	0	0	0	0	0	0	0	0	0	0
PB.16942.3	2700049A03Rik	2700049A03Rik-S-3	ISM	2.85426	4.22892	2.75031	2.79601	4.00396	2.96193	2.09948	2.055	2.82934	2.1791	3.49177	3.84979	4.00247	3.82454	3.53637	4.78193	2.15772	3.68734	2.92112	0	0	0	0	0	0	0	0	0	0	0	0	0	0	0	0	0	0	0	0	0	0	0	0	0	0	0
PB.68724.263	Tmem41b	Tmem41b-S-263	ISM	0	0	0	0	0	0	0	0	0	0	0	0	0	0	0	0	0	0	0	0	0	0	0	0	0	0	0	0	0	0	0	0	0	0	3.13018	3.47019	0	0	0	0	0	0	3.6987	0	0	0
PB.49933.476	Nexn	Nexn-S-476	NIC	0	0	0	0	0	1.96174	0	0	0	0	0	0	2.04338	0	1.64244	2.27886	0	2.01354	1.92483	0	0	0	0	0	0	0	0	0	0	0	0	0	0	0	0	0	0	0	0	0	0	0	0	0	0	0
PB.61219.106	Wasl	Wasl-S-106	ISM	1.86468	0	2.11911	2.79601	0	0	0	0	0	0	3.00104	2.41757	0	0	1.64244	3.13174	0	0	0	0	0	0	0	0	2.74483	0	0	0	0	0	0	0	0	0	0	0	0	0	0	0	0	0	0	0	0	0
PB.79491.10	Nkap	Nkap-S-10	ISM	0	0	0	0	2.2995	0	0	0	0	0	0	1.80981	0	0	0	1.6832	0	2.01354	0	0	0	0	0	0	0	0	0	0	0	0	0	0	3.10739	0	0	0	0	0	0	0	0	0	0	0	0	0
PB.47496.1	Smc4	Smc4-S-1	ISM	3.12744	2.67612	3.13424	2.16213	2.2995	1.96174	2.72941	2.055	0	0	3.49177	2.79287	2.66954	3.82454	3.08368	3.45567	2.79133	3.96874	1.92483	0	0	0	0	0	0	2.71216	0	0	0	0	0	0	0	0	0	0	0	0	0	0	0	0	0	0	0	0
PB.60998.9	Ndufa4	Ndufa4-S-9	FSM	1.86468	0	0	0	0	0	0	0	0	0	0	0	0	0	1.64244	2.27886	0	0	0	0	0	0	2.97402	3.04884	0	0	0	0	0	0	0	0	0	0	0	0	0	0	0	0	0	0	0	0	0	0
PB.49747.11	Gtf2b	Gtf2b-S-11	ISM	1.86468	2.04954	0	0	0	0	0	0	0	0	3.49177	1.80981	3.05164	2.13636	1.64244	1.6832	0	0	1.92483	0	0	0	0	0	0	0	0	0	0	0	0	0	0	0	0	0	0	0	0	0	0	0	0	0	0	0
PB.43159.7	Katnbl1	Katnbl1-S-7	FSM	0	2.04954	0	0	0	1.96174	0	0	0	0	0	0	0	3.42993	0	2.91945	0	0	0	0	0	3.43962	2.97402	0	0	0	2.80904	0	0	0	0	0	3.10739	0	0	0	0	0	3.11123	0	0	0	0	0	0	0
PB.31638.84	Sft2d1	Sft2d1-S-84	NIC	1.86468	0	3.13424	0	0	2.96193	2.09948	2.055	0	2.1791	0	2.79287	2.04338	0	0	0	1.57395	3.01892	0	0	0	0	0	0	0	2.71216	0	0	0	0	3.67839	0	0	0	0	4.14766	3.11271	0	3.11123	0	0	0	0	0	0	0
PB.21593.23	Aggf1	Aggf1-S-23	ISM	1.86468	2.04954	2.75031	0	0	0	0	0	0	0	2.62014	1.80981	0	2.13636	0	0	0	0	0	0	0	0	0	0	0	0	0	0	0	0	0	0	0	0	0	0	0	0	0	0	0	0	0	0	0	0
PB.51285.7	Anp32b	Anp32b-S-7	ISM	2.85426	3.05837	3.80538	2.16213	3.60758	0	0	0	2.19357	2.1791	3.49177	3.45491	4.31593	2.76866	3.08368	2.91945	3.00213	4.08443	3.58696	2.84395	2.99065	0	0	3.04884	0	0	2.80904	3.5367	0	0	0	0	0	0	0	0	0	0	0	0	0	0	0	0	0	0
PB.45761.14	Gm2004	Gm2004-S-14	NNC	0	0	0	0	0	0	0	0	0	0	0	0	0	0	0	0	0	0	0	0	2.99065	0	0	0	0	0	0	0	0	0	0	0	0	0	0	0	0	0	0	0	0	0	0	0	0	0
PB.58314.17	Rpap2	Rpap2-S-17	ISM	0	0	0	2.16213	0	0	0	0	0	0	0	0	0	2.76866	0	0	0	2.01354	0	0	0	0	0	0	0	2.71216	0	2.87225	0	0	0	0	0	0	0	0	0	0	0	0	0	0	0	0	0	0
PB.27365.6	Dnal4	Dnal4-S-6	ISM	2.85426	2.04954	2.11911	2.16213	2.2995	0	0	3.06435	0	0	2.62014	0	0	0	0	0	3.00213	0	3.19524	0	0	3.43962	0	3.04884	0	0	0	2.87225	0	0	0	0	0	0	0	0	0	0	0	0	0	0	0	0	0	0
PB.53781.27	Mecr	Mecr-S-27	FSM	0	0	0	0	0	0	0	0	0	0	0	0	0	0	0	0	0	0	0	0	0	0	0	0	0	0	0	0	0	0	3.01019	0	0	0	0	0	0	0	0	0	0	0	0	0	0	0
PB.35864.32	Fam53c	Fam53c-S-32	ISM	0	0	0	0	0	0	0	0	0	0	0	2.41757	0	0	2.23382	0	0	0	0	2.84395	0	0	0	0	0	3.37154	0	0	0	0	0	0	0	0	3.13018	0	0	0	0	0	0	0	0	0	0	0
PB.77066.10	Senp6	Senp6-S-10	ISM	0	2.67612	2.11911	0	0	1.96174	0	0	0	2.1791	0	0	2.04338	0	1.64244	2.27886	0	0	0	0	0	0	0	0	0	0	0	0	0	0	0	0	0	0	0	0	0	0	0	0	0	0	0	0	0	0
PB.37353.61	Txnl4a	Txnl4a-S-61	NIC	0	0	0	0	0	0	0	0	0	0	0	0	0	0	0	0	0	0	0	0	0	0	0	0	0	2.71216	0	0	0	0	0	0	0	0	0	0	0	0	0	0	0	0	0	0	0	0
PB.4426.8	Mpzl1	Mpzl1-S-8	FSM	0	0	0	0	0	2.58199	0	2.055	0	0	2.62014	1.80981	2.04338	0	2.23382	1.6832	2.15772	2.01354	2.54223	0	2.99065	0	0	0	0	0	0	2.87225	0	0	0	0	0	0	0	0	0	0	0	0	0	0	0	0	0	0
PB.34383.158	Ndc80	Ndc80-S-158	ISM	0	0	2.11911	0	0	0	0	0	0	0	1.99726	1.80981	0	2.13636	0	2.27886	0	0	0	0	0	0	0	0	0	0	0	0	0	0	0	0	0	0	0	0	0	0	0	0	0	0	0	0	0	0
PB.76322.34	Rpl4	Rpl4-S-34	ISM	0	0	2.11911	2.16213	2.2995	0	0	0	0	0	0	1.80981	0	2.13636	1.64244	0	0	0	0	0	0	0	0	0	0	0	0	0	0	0	0	0	0	0	0	0	0	0	0	0	0	0	0	0	0	0
PB.67366.37	Ube3a	Ube3a-S-37	ISM	0	0	0	0	0	2.58199	0	0	0	2.1791	1.99726	1.80981	0	2.76866	2.23382	1.6832	0	0	0	0	0	0	0	0	0	0	0	0	0	0	0	0	0	0	0	0	0	0	0	0	0	0	0	0	0	0
PB.12564.44	Supt6	Supt6-S-44	ISM	0	0	0	0	0	0	0	0	2.19357	0	1.99726	0	0	0	0	2.91945	0	0	0	0	0	0	0	0	2.74483	0	0	0	0	0	0	0	0	0	0	0	0	0	0	0	0	0	0	0	0	0
PB.12705.91	Utp6	Utp6-S-91	ISM	0	0	0	0	0	1.96174	0	0	0	0	0	1.80981	2.04338	2.13636	0	2.27886	0	0	0	0	0	0	0	0	0	0	0	0	0	0	0	0	0	0	0	0	0	0	0	0	0	0	0	0	0	0
PB.30633.17	Cmss1	Cmss1-S-17	NNC	1.86468	0	0	0	0	0	0	0	0	0	1.99726	0	0	0	0	0	0	0	0	0	0	0	0	0	2.74483	0	0	2.87225	0	0	4.07539	0	3.10739	3.24901	4.48314	0	3.78336	2.96822	0	2.95272	3.88458	4.81257	0	3.88715	0	0
PB.77149.45	Ibtk	Ibtk-S-45	ISM	1.86468	2.67612	2.11911	2.16213	0	0	0	2.68196	2.82934	0	0	1.80981	0	2.13636	0	0	2.15772	2.63759	0	0	0	0	2.97402	0	0	0	0	2.87225	0	0	3.01019	0	3.10739	0	0	0	0	0	0	0	0	0	0	0	4.88385	0
PB.69012.73	Thumpd1	Thumpd1-S-73	ISM	0	0	0	0	0	0	0	2.055	0	0	1.99726	2.41757	0	0	0	2.6496	1.57395	0	1.92483	0	0	0	0	0	0	0	0	0	0	0	0	0	0	0	3.13018	0	0	0	0	0	0	0	0	0	0	0
PB.11700.44	Ubb	Ubb-S-44	FSM	1.86468	0	3.6275	0	3.3289	0	0	2.055	0	0	1.99726	0	0	2.13636	0	1.6832	0	2.01354	0	0	0	0	2.97402	0	0	0	0	0	0	0	0	0	0	0	0	0	0	0	0	0	0	0	0	0	0	0
PB.11260.8	Cdc42se2	Cdc42se2-S-8	ISM	1.86468	2.67612	0	2.16213	0	1.96174	0	2.68196	3.70956	3.19929	0	0	0	2.13636	2.87192	0	2.52389	3.01892	1.92483	3.50757	2.99065	3.43962	0	3.04884	0	3.37154	0	2.87225	0	0	0	0	3.10739	0	0	0	0	0	0	0	0	0	0	0	0	5.554
PB.10819.15	Slu7	Slu7-S-15	ISM	0	0	0	0	0	1.96174	0	0	2.19357	0	1.99726	0	2.66954	0	2.60293	0	0	0	0	0	0	0	0	0	0	0	0	0	0	0	0	0	0	0	0	0	0	0	0	0	0	0	0	0	0	0
PB.11690.18	Pigl	Pigl-S-18	ISM	0	0	0	0	0	0	0	0	0	0	0	0	0	0	0	0	1.57395	0	0	0	0	0	0	0	0	0	0	0	0	0	0	0	0	0	0	0	0	0	0	0	0	0	0	0	0	0
PB.48833.49	Cttnbp2nl	Cttnbp2nl-S-49	FSM	2.47719	3.87847	2.11911	2.16213	0	0	0	0	2.19357	0	2.62014	0	2.66954	2.76866	2.60293	3.69994	1.57395	0	0	0	0	0	0	0	2.74483	0	0	0	0	0	3.01019	0	0	0	0	0	0	0	0	0	0	0	0	0	0	0
PB.4034.7	Nmnat2	Nmnat2-S-7	NNC	0	2.04954	0	0	0	1.96174	0	0	0	0	1.99726	0	0	0	0	0	1.57395	2.01354	2.54223	0	0	0	0	0	0	0	0	0	0	0	0	0	0	0	0	0	0	0	0	0	0	0	0	0	0	0
PB.8936.115	Cct2	Cct2-S-115	ISM	0	2.04954	0	0	0	0	0	0	0	0	2.62014	0	2.04338	0	1.64244	1.6832	0	0	0	0	0	0	2.97402	0	0	0	0	0	0	0	0	0	0	0	0	0	0	0	0	0	0	0	0	0	0	0
PB.56565.48	Tbc1d14	Tbc1d14-S-48	FSM	0	0	0	0	0	0	0	0	0	0	0	0	2.04338	0	2.23382	1.6832	0	0	0	2.84395	4.05518	3.43962	2.97402	0	0	0	0	3.93241	0	0	0	0	0	0	0	0	0	0	0	0	0	0	0	0	0	0
PB.72221.117	Arhgap10	Arhgap10-S-117	ISM	2.47719	0	0	0	2.2995	0	0	0	0	0	3.00104	0	0	2.13636	0	2.27886	0	0	0	0	0	0	0	0	0	0	0	0	0	0	0	0	0	0	0	0	0	0	0	0	0	0	0	0	0	0
PB.24985.16	Commd6	Commd6-S-16	ISM	1.86468	2.04954	0	0	0	0	2.09948	0	0	0	1.99726	0	0	2.13636	2.23382	0	1.57395	0	2.54223	0	0	0	0	0	0	0	0	0	0	0	0	0	0	0	0	0	0	0	0	0	0	0	0	0	0	0
PB.2343.133	Sp110	Sp110-S-133	NNC	3.66809	4.40881	4.40135	2.16213	4.68795	3.9099	0	2.055	2.82934	0	4.26348	4.13214	4.62251	4.50671	4.61538	5.33267	3.17614	4.1881	3.98315	2.84395	2.99065	0	0	0	3.40532	0	0	0	0	0	0	0	0	0	0	0	0	0	0	0	0	0	0	0	4.19825	0
PB.16966.6	Daam1	Daam1-S-6	ISM	0	0	0	0	0	0	0	0	0	0	1.99726	0	2.04338	2.76866	0	1.6832	0	2.01354	0	0	0	0	0	0	0	0	0	0	0	0	0	0	0	0	0	0	0	0	0	0	0	0	0	0	0	0
PB.63338.34	Slc25a26	Slc25a26-S-34	NNC	0	2.04954	0	0	2.2995	0	2.72941	2.68196	2.19357	2.1791	0	0	2.66954	2.13636	2.23382	2.27886	2.15772	0	0	0	2.99065	0	0	0	0	0	0	0	0	0	0	0	0	0	0	0	0	0	0	0	0	0	0	0	0	0
PB.32193.7	Rnps1	Rnps1-S-7	FSM	1.86468	0	0	0	0	0	0	0	0	2.1791	0	0	0	0	0	0	0	0	0	0	0	0	0	0	0	0	0	0	0	0	0	0	0	0	0	0	0	2.96822	0	2.95272	0	0	0	0	0	0
PB.61444.49	Mkln1	Mkln1-S-49	FSM	0	2.04954	2.75031	0	2.2995	0	0	0	0	0	2.62014	1.80981	2.66954	0	0	1.6832	0	2.01354	0	0	0	0	0	0	0	0	0	2.87225	0	0	0	0	0	0	0	0	0	0	0	0	0	0	0	0	0	0
PB.11071.29	Nhp2	Nhp2-S-29	ISM	0	0	0	0	0	0	0	0	0	0	0	0	0	0	0	0	0	0	0	0	0	0	0	0	0	0	0	0	0	0	3.01019	3.99414	0	0	3.13018	0	3.78336	0	0	3.61942	3.88458	4.12752	0	4.56999	4.19825	0
PB.3376.35	Slc45a3	Slc45a3-S-35	FSM	0	0	0	0	0	0	0	0	0	0	0	1.80981	0	0	0	0	0	2.01354	0	0	2.99065	0	0	0	0	2.71216	3.4716	2.87225	0	0	0	0	0	0	0	0	0	0	0	0	0	0	0	0	0	0
PB.44781.21	Phf20	Phf20-S-21	NNC	1.86468	0	0	0	2.2995	0	0	0	0	0	0	2.41757	2.66954	0	0	1.6832	2.15772	2.01354	1.92483	0	0	0	0	0	0	0	3.4716	0	0	0	0	0	0	0	0	0	0	0	0	0	0	0	0	0	0	0
PB.60050.5	Cnpy4	Cnpy4-S-5	FSM	1.86468	2.67612	3.13424	2.16213	2.2995	2.96193	0	0	0	0	3.27621	3.06512	2.66954	3.64657	2.87192	3.30676	1.57395	2.63759	2.54223	0	0	0	0	0	0	0	0	0	0	4.4043	0	0	0	0	0	0	0	0	0	0	0	0	0	0	0	0
PB.6767.5	Asf1a	Asf1a-S-5	FSM	0	0	0	0	2.2995	0	0	0	0	0	0	1.80981	3.32743	2.76866	2.23382	1.6832	1.57395	2.01354	0	0	0	0	0	0	0	0	0	0	0	0	0	0	0	0	0	0	0	0	0	0	0	0	0	0	0	0
PB.47496.7	Smc4	Smc4-S-7	ISM	1.86468	3.05837	3.13424	0	0	0	2.09948	0	0	0	0	2.79287	3.32743	2.76866	2.23382	2.27886	2.15772	3.29432	1.92483	0	0	0	0	0	0	0	0	0	0	0	0	0	0	0	0	0	0	0	0	0	0	0	0	0	0	0
PB.50532.5	Pnisr	Pnisr-S-5	ISM	0	0	0	0	0	1.96174	0	0	0	0	1.99726	1.80981	0	2.13636	2.23382	1.6832	0	0	0	0	0	0	0	0	2.74483	0	0	0	0	0	0	0	0	0	0	0	0	0	0	0	0	0	0	0	0	0
PB.10819.2	Slu7	Slu7-S-2	ISM	1.86468	0	2.11911	0	0	0	2.09948	0	0	0	3.00104	1.80981	2.04338	2.13636	1.64244	3.30676	0	2.63759	2.54223	0	0	0	0	0	0	0	0	0	0	0	0	0	0	0	3.13018	0	0	0	0	0	0	0	0	0	0	0
PB.45003.28	Chd6	Chd6-S-28	ISM	0	0	0	0	0	0	0	0	0	0	1.99726	1.80981	2.04338	2.13636	0	0	0	2.01354	0	0	0	0	0	0	0	0	0	0	0	0	0	0	0	0	0	0	0	0	0	0	0	0	0	0	0	0
PB.35278.65	Esco1	Esco1-S-65	ISM	0	2.04954	2.11911	0	0	0	0	0	0	0	1.99726	0	0	2.13636	1.64244	2.27886	0	0	0	0	2.99065	0	2.97402	0	0	0	0	0	0	0	0	0	0	0	0	0	0	0	0	0	0	0	0	0	0	0
PB.71752.586	Trim61	Trim61-S-586	FSM	2.47719	2.04954	2.75031	0	2.2995	0	0	0	0	0	3.27621	3.27889	2.04338	2.13636	2.23382	3.13174	0	2.01354	0	2.84395	0	0	0	0	0	0	0	0	0	0	0	0	3.10739	0	0	0	0	0	0	0	0	0	0	0	0	0
PB.39642.119	Sfr1	Sfr1-S-119	ISM	4.01708	3.72776	4.48734	0	0	1.96174	2.09948	0	2.19357	0	3.49177	3.06512	2.04338	3.82454	3.53637	4.32423	1.57395	2.01354	0	0	0	3.43962	0	0	0	0	0	0	0	0	0	0	0	0	0	0	0	0	0	0	0	0	0	0	0	0
PB.16838.7	Rpl36al	Rpl36al-S-7	FSM	0	0	0	0	0	0	0	0	0	0	1.99726	0	0	0	0	0	0	0	0	0	0	0	0	0	0	0	0	0	0	0	0	0	0	0	0	3.47019	3.11271	2.96822	0	0	0	0	0	0	0	0
PB.24313.134	Esco2	Esco2-S-134	ISM	0	3.05837	2.11911	0	2.94119	1.96174	0	0	2.19357	0	0	3.06512	2.66954	2.13636	2.60293	3.13174	0	2.01354	0	0	0	0	0	0	0	0	0	0	0	0	0	0	0	0	0	0	0	0	0	0	0	0	0	0	0	0
PB.14747.16	H3f3b	H3f3b-S-16	ISM	4.41653	4.12518	3.41098	3.67498	3.82529	4.30866	3.93443	4.2351	3.49252	4.27033	4.16958	3.45491	3.05164	4.10675	2.60293	3.45567	3.84819	4.28203	3.98315	2.84395	3.65835	0	2.97402	4.11533	4.48155	4.04737	2.80904	4.21519	4.62482	0	0	0	0	0	0	0	3.11271	0	3.11123	2.95272	0	0	0	4.56999	0	0
PB.52920.188	Nasp	Nasp-S-188	ISM	0	3.55023	2.11911	2.16213	2.94119	2.96193	2.09948	0	0	0	4.06593	3.84979	4.40183	4.65928	3.75367	4.38065	0	4.08443	3.19524	0	0	0	0	0	0	0	0	2.87225	0	0	0	0	0	0	0	0	0	0	0	0	0	0	0	0	0	0
PB.68661.2	Ppfibp2	Ppfibp2-S-2	ISM	1.86468	2.67612	2.75031	2.16213	2.94119	1.96174	2.09948	2.055	0	0	3.27621	3.45491	3.54337	3.42993	3.40699	2.91945	2.15772	0	1.92483	2.84395	0	0	0	0	0	0	0	0	0	0	0	0	0	0	0	0	0	0	0	0	0	0	0	0	0	0
PB.35636.79	Tpgs2	Tpgs2-S-79	NNC	0	0	0	0	0	0	0	0	0	0	0	0	2.04338	0	0	1.6832	0	0	0	0	2.99065	0	2.97402	0	0	0	0	0	0	0	0	0	3.10739	0	0	0	0	0	0	0	0	0	0	0	0	0
PB.42036.4	Ppig	Ppig-S-4	ISM	1.86468	3.05837	2.75031	0	2.94119	3.62887	2.09948	0	2.19357	0	1.99726	3.06512	3.54337	3.42993	1.64244	3.80283	0	2.01354	1.92483	0	0	0	0	3.04884	0	0	0	0	0	0	0	0	0	0	0	0	0	0	0	0	0	0	0	0	0	0
PB.62603.19	Immt	Immt-S-19	ISM	1.86468	2.04954	0	0	0	0	0	0	0	0	0	0	2.04338	0	2.23382	1.6832	0	0	0	0	0	0	0	0	0	0	0	0	0	0	0	0	0	0	0	0	0	0	0	0	0	0	0	0	0	0
PB.65887.5	Gm44796	Gm44796-S-5	NNC	0	0	0	0	0	0	2.09948	0	0	0	0	1.80981	3.32743	2.13636	1.64244	0	1.57395	0	1.92483	0	2.99065	0	3.64129	0	0	0	2.80904	2.87225	4.62482	0	0	0	0	0	0	0	0	0	0	0	0	0	0	0	0	0
PB.10012.62	Hus1	Hus1-S-62	ISM	1.86468	2.04954	0	0	2.2995	0	0	0	0	0	0	2.41757	0	0	1.64244	1.6832	0	0	0	0	0	0	0	0	0	0	0	0	0	0	0	0	0	0	0	0	0	0	0	0	0	0	0	0	0	0
PB.34532.23	Fam98a	Fam98a-S-23	ISM	1.86468	2.04954	2.11911	2.16213	0	0	0	0	0	0	0	0	2.66954	2.13636	1.64244	2.27886	0	0	0	0	0	0	0	0	0	0	0	0	0	0	0	0	0	0	0	0	0	0	0	0	0	0	0	0	0	0
PB.4636.3	B930036N10Rik	B930036N10Rik-S-3	FSM	0	0	0	2.79601	2.2995	0	0	2.055	0	2.1791	3.00104	0	2.66954	2.13636	0	0	1.57395	0	0	0	0	0	0	0	0	2.71216	0	0	3.94143	0	0	0	0	0	0	0	0	0	0	0	3.88458	0	0	0	0	0
PB.39840.210	Ccdc186	Ccdc186-S-210	ISM	0	0	0	0	2.2995	2.58199	0	0	0	0	1.99726	0	2.04338	2.76866	1.64244	0	0	2.63759	0	0	0	0	0	0	0	0	0	0	0	0	0	0	0	0	0	0	0	0	0	0	0	0	0	0	0	0
PB.58431.48	Gm15446	Gm15446-S-48	FSM	0	0	0	0	0	0	0	0	0	0	0	0	0	0	1.64244	0	0	0	0	0	0	0	0	0	0	0	0	0	0	0	0	0	0	0	0	0	0	0	0	0	0	0	0	0	0	0
PB.70186.5	Zfp958	Zfp958-S-5	FSM	0	0	0	0	0	0	0	0	0	0	2.62014	0	2.04338	2.13636	1.64244	0	0	0	0	0	0	0	0	0	0	0	0	0	0	0	0	0	0	0	0	0	0	0	0	0	0	0	3.6987	0	0	0
PB.36920.61	Gm19784	Gm19784-S-61	FSM	0	0	0	0	2.2995	0	2.09948	0	0	0	2.62014	1.80981	2.04338	2.13636	1.64244	0	1.57395	0	0	0	4.05518	0	0	0	0	3.7655	0	2.87225	0	0	0	0	0	0	0	0	0	0	0	0	0	0	0	0	0	0
PB.21938.76	Srek1	Srek1-S-76	ISM	0	2.04954	0	2.16213	0	0	0	2.055	0	2.1791	1.99726	1.80981	0	0	1.64244	2.27886	0	0	0	0	0	0	0	0	0	0	0	0	0	0	0	0	0	0	0	0	0	0	0	0	0	0	0	0	0	0
PB.19746.59	Riok1	Riok1-S-59	NIC	0	0	2.11911	0	0	0	0	0	0	0	0	1.80981	2.66954	0	1.64244	2.27886	2.15772	0	1.92483	0	0	0	0	0	0	0	0	0	0	0	0	0	0	0	0	0	0	0	0	0	0	0	0	0	0	0
PB.81007.198	Atrx	Atrx-S-198	FSM	0	2.04954	0	0	0	0	0	0	0	0	0	0	2.66954	0	1.64244	2.27886	1.57395	2.01354	0	0	0	0	0	0	0	0	0	0	0	0	0	0	0	0	0	0	0	0	0	0	0	0	0	0	0	0
PB.48106.302	Ubap2l	Ubap2l-S-302	ISM	3.12744	3.87847	2.11911	2.16213	2.2995	2.58199	3.38938	0	0	0	3.66901	2.79287	3.05164	3.15298	2.87192	3.45567	0	0	0	0	0	0	0	0	0	0	0	0	0	0	0	0	3.10739	0	0	0	0	0	0	2.95272	0	0	0	0	0	0
PB.18444.184	Eif5	Eif5-S-184	FSM	0	0	2.75031	0	0	0	0	0	0	0	0	0	2.04338	2.13636	2.23382	1.6832	0	0	0	0	0	0	0	0	0	0	0	0	0	0	0	0	0	0	0	0	0	0	0	0	0	0	0	0	0	0
PB.55953.107	Abcf2	Abcf2-S-107	ISM	0	0	0	0	0	0	2.09948	0	0	0	0	0	2.04338	0	0	1.6832	0	0	0	0	0	0	0	3.04884	0	0	0	2.87225	0	0	0	0	0	0	0	0	0	0	3.11123	0	0	0	0	0	0	0
PB.20568.102	Gkap1	Gkap1-S-102	ISM	0	2.04954	0	0	2.2995	0	0	0	0	0	0	0	2.66954	2.13636	0	3.13174	0	2.01354	0	0	0	0	0	0	0	0	0	0	0	0	0	0	0	0	0	0	0	0	0	0	0	0	0	0	0	0
PB.36.194	Tcea1	Tcea1-S-194	ISM	0	0	0	0	0	0	0	0	0	0	2.62014	0	0	0	0	0	0	0	0	2.84395	2.99065	0	0	0	0	0	0	0	0	0	0	0	3.10739	0	0	0	0	0	0	0	0	0	0	0	0	0
PB.39840.238	Ccdc186	Ccdc186-S-238	ISM	1.86468	2.04954	3.13424	0	2.2995	0	0	2.055	2.19357	0	3.49177	1.80981	4.00247	2.13636	2.23382	4.38065	2.15772	3.29432	1.92483	0	0	0	0	0	0	0	0	0	0	0	0	0	0	0	0	0	0	0	0	0	0	0	0	0	0	0
PB.16534.158	Snx6	Snx6-S-158	ISM	1.86468	3.55023	2.75031	0	3.82529	3.23659	2.09948	0	2.19357	0	3.49177	3.27889	3.32743	3.15298	3.25834	3.45567	0	2.63759	1.92483	0	0	0	0	0	0	0	0	0	0	0	0	0	0	0	0	0	0	0	0	0	0	0	0	0	0	0
PB.54794.167	Zfp981	Zfp981-S-167	NNC	0	0	0	0	0	0	0	0	0	0	0	0	0	0	0	0	0	0	0	0	0	0	0	0	0	0	0	0	0	0	0	0	0	0	0	0	0	0	0	0	0	0	0	0	0	0
PB.10500.35	Cfap36	Cfap36-S-35	ISM	0	0	2.11911	0	2.94119	0	0	0	0	0	1.99726	0	2.04338	2.13636	2.23382	1.6832	0	0	0	0	0	0	0	0	0	0	0	0	0	0	0	0	0	0	0	0	0	0	0	0	0	0	0	0	0	0
PB.36.196	Tcea1	Tcea1-S-196	ISM	1.86468	0	2.11911	2.16213	0	2.58199	2.09948	2.055	0	0	0	1.80981	3.05164	0	0	0	2.52389	0	1.92483	0	0	0	0	0	0	0	0	0	3.94143	0	0	0	0	0	0	0	0	0	0	0	0	0	0	0	0	0
PB.36.192	Tcea1	Tcea1-S-192	ISM	2.47719	2.67612	2.11911	2.79601	2.2995	1.96174	2.09948	2.68196	2.82934	3.87183	0	2.41757	2.66954	2.13636	2.60293	2.6496	2.79133	2.63759	1.92483	3.903	0	0	3.64129	3.04884	2.74483	3.37154	4.14909	2.87225	0	0	3.01019	0	0	0	0	3.47019	0	0	0	0	0	0	0	0	0	0
PB.67846.119	Prc1	Prc1-S-119	FSM	4.34839	4.48792	4.40135	3.18091	4.15551	3.45185	3.11288	0	0	0	4.42837	3.84979	4.55422	5.10782	3.84685	4.57904	0	3.29432	3.19524	0	0	0	0	0	3.40532	0	0	2.87225	0	0	0	0	0	0	0	0	0	0	0	0	0	0	0	0	0	0
PB.20893.160	Gm48222	Gm48222-S-160	FSM	0	0	0	0	0	0	0	0	0	0	0	0	0	0	0	0	0	0	0	0	0	0	0	0	2.74483	0	0	0	0	0	0	0	0	0	0	0	0	0	0	0	0	0	0	0	0	0
PB.50277.18	Ccne2	Ccne2-S-18	ISM	0	0	0	2.16213	0	0	0	0	0	0	1.99726	0	0	0	0	0	0	0	0	2.84395	2.99065	3.43962	0	0	0	0	0	0	0	0	0	0	0	0	0	0	0	0	0	0	0	0	0	0	0	0
PB.73818.46	Usp10	Usp10-S-46	NNC	0	0	0	0	0	0	0	0	0	0	0	0	0	0	0	0	0	0	0	0	0	0	0	0	0	0	0	0	0	0	0	0	3.10739	0	0	0	0	2.96822	3.11123	2.95272	0	0	0	0	0	0
PB.75241.20	Hyls1	Hyls1-S-20	FSM	0	2.04954	0	0	0	0	0	0	0	0	1.99726	2.41757	2.04338	0	1.64244	0	0	0	0	0	0	0	0	0	0	0	0	0	0	0	0	0	0	0	0	0	0	0	0	0	0	0	0	0	0	0
PB.13797.63	Smarce1	Smarce1-S-63	ISM	0	2.04954	2.11911	0	2.2995	0	0	0	0	0	0	0	2.04338	0	0	1.6832	0	0	0	0	0	0	0	0	0	0	0	0	0	0	0	0	0	0	0	0	0	0	0	0	0	0	0	0	0	0
PB.60344.44	Fam220a	Fam220a-S-44	NNC	2.85426	3.33425	2.11911	2.79601	2.2995	1.96174	2.09948	0	0	0	1.99726	2.79287	3.72086	3.15298	2.60293	2.91945	1.57395	3.29432	0	2.84395	2.99065	0	2.97402	0	3.40532	0	3.4716	2.87225	0	0	0	0	0	0	0	0	3.11271	0	0	0	0	0	0	0	0	0
PB.56153.26	Dnajb6	Dnajb6-S-26	ISM	1.86468	2.04954	3.80538	3.45816	3.3289	2.96193	0	3.06435	0	0	3.00104	3.84979	4.11822	3.82454	3.08368	3.30676	0	0	0	0	0	0	2.97402	0	3.40532	0	0	2.87225	0	0	0	0	0	0	0	0	0	0	0	0	0	0	0	0	0	0
PB.28868.155	Usp7	Usp7-S-155	ISM	2.85426	3.05837	0	0	2.94119	1.96174	0	0	2.19357	0	1.99726	3.84979	3.32743	3.15298	3.08368	3.80283	2.52389	2.63759	0	0	0	0	0	0	0	0	0	0	0	0	0	0	0	0	0	0	0	0	0	0	0	0	0	0	0	0
PB.72098.6	Gm10282	Gm10282-S-6	FSM	3.12744	3.33425	3.13424	3.18091	2.2995	3.23659	0	0	0	3.19929	1.99726	3.27889	4.00247	3.64657	3.65091	3.69994	3.17614	3.29432	3.19524	3.50757	0	0	4.03797	3.71799	3.40532	3.7655	3.86665	4.76845	3.94143	6.00391	6.94959	7.0899	6.77635	6.67642	6.03232	6.48464	6.20472	5.55838	6.1124	6.42709	7.23182	6.41549	6.67064	6.57587	6.26446	5.554
PB.66614.15	Cep89	Cep89-S-15	ISM	0	2.04954	2.11911	0	2.94119	0	0	0	0	0	0	0	2.04338	2.13636	2.23382	2.27886	0	2.01354	2.54223	0	0	0	0	0	0	0	0	0	0	0	0	0	0	0	0	0	0	0	0	0	0	0	0	0	0	0
PB.40993.221	Set	Set-S-221	ISM	0	0	0	0	0	0	0	0	0	0	0	0	0	2.13636	0	1.6832	0	0	0	0	0	0	0	0	0	0	0	0	0	0	0	0	0	0	0	0	0	0	0	2.95272	0	0	3.6987	0	0	0
PB.67447.48	Mphosph10	Mphosph10-S-48	ISM	0	0	0	0	2.2995	0	0	0	0	0	1.99726	3.27889	3.05164	2.76866	2.23382	3.30676	0	2.63759	1.92483	0	0	0	0	0	0	0	0	0	0	0	0	0	0	0	0	0	0	0	0	0	0	0	0	0	0	0
PB.17780.299	Gm10436	Gm10436-S-299	FSM	1.86468	0	0	0	0	0	0	0	0	0	1.99726	1.80981	2.04338	0	2.23382	0	1.57395	0	0	2.84395	0	0	4.32124	0	3.40532	0	2.80904	0	5.02701	0	0	3.31925	0	0	0	0	0	0	0	0	0	0	0	0	0	0
PB.37353.85	Txnl4a	Txnl4a-S-85	NIC	0	0	0	0	0	0	0	0	0	0	0	0	0	0	0	0	0	0	0	0	0	0	0	0	0	0	0	0	0	0	0	0	0	0	0	0	0	0	0	0	0	0	0	0	0	0
PB.73850.59	Emc8	Emc8-S-59	NIC	0	0	0	0	0	0	0	0	0	0	0	0	0	0	0	0	0	0	0	0	0	0	0	0	0	0	0	0	0	0	0	0	0	0	3.13018	3.47019	0	2.96822	0	0	0	0	0	0	0	0
PB.63068.116	D6Ertd527e	D6Ertd527e-S-116	FSM	1.86468	0	2.11911	0	0	1.96174	0	0	0	0	0	2.79287	0	3.15298	0	1.6832	0	0	0	0	0	0	0	0	0	0	0	0	0	0	0	0	0	0	0	0	0	0	0	0	0	0	0	0	0	0
PB.70186.8	Zfp958	Zfp958-S-8	FSM	0	0	0	0	0	0	0	0	0	0	1.99726	0	0	0	0	1.6832	0	0	0	0	0	0	0	0	0	0	0	0	0	0	0	0	0	0	0	0	0	0	0	0	0	0	0	0	0	0
PB.10845.101	Ttc1	Ttc1-S-101	ISM	0	2.04954	2.11911	0	0	0	0	0	0	0	1.99726	0	0	2.13636	1.64244	1.6832	0	0	0	0	0	0	0	0	2.74483	0	0	0	0	0	0	0	0	0	0	0	0	0	0	0	0	0	0	0	0	0
PB.75268.224	Chek1	Chek1-S-224	ISM	0	2.04954	0	2.79601	0	1.96174	0	0	0	0	3.27621	2.79287	2.04338	0	3.08368	1.6832	0	0	1.92483	0	0	0	2.97402	0	0	0	0	0	0	0	0	0	0	0	0	0	0	0	0	0	0	0	0	0	0	0
PB.47496.11	Smc4	Smc4-S-11	ISM	0	0	2.11911	0	0	0	0	0	0	0	0	0	2.66954	2.13636	1.64244	2.27886	0	2.63759	1.92483	0	0	0	0	0	0	0	0	0	0	0	0	0	0	0	0	0	0	0	0	0	0	0	0	0	0	0
PB.63260.11	Ccdc174	Ccdc174-S-11	FSM	0	0	0	0	0	0	0	0	0	0	0	0	0	0	0	0	0	0	0	0	0	0	0	0	0	0	0	0	0	0	0	0	0	0	0	0	3.11271	0	0	0	0	0	0	0	0	0
PB.13905.46	Mlx	Mlx-S-46	FSM	0	0	0	0	2.94119	0	2.09948	0	2.82934	0	0	0	2.66954	0	0	0	1.57395	3.01892	1.92483	0	0	0	0	0	0	0	0	0	0	0	0	0	0	0	0	0	0	0	0	0	0	0	0	0	0	0
PB.33061.20	Ppt2	Ppt2-S-20	ISM	2.47719	2.67612	0	0	0	0	2.09948	0	0	0	0	0	0	0	0	0	0	2.01354	2.54223	0	0	0	0	0	0	0	0	0	0	0	0	0	0	0	0	0	0	0	0	0	0	0	0	0	0	0
PB.5183.125	Cenpf	Cenpf-S-125	ISM	2.47719	3.05837	2.11911	2.16213	2.94119	1.96174	0	0	0	0	3.00104	3.27889	3.05164	3.42993	1.64244	3.45567	2.15772	3.51002	3.19524	0	0	0	0	0	0	0	0	0	0	0	0	0	0	0	0	0	0	0	0	0	0	0	0	0	0	0
PB.78709.825	mt-Nd5	mt-Nd5-S-825	FSM	5.16778	5.382	5.55036	5.75661	5.33412	5.31166	4.97146	4.87007	5.07732	5.67339	6.10215	5.67753	5.7579	5.59794	4.96077	6.05474	4.44459	4.82274	4.4865	4.7387	4.33852	5.49059	5.32435	6.04715	5.93915	5.28758	5.74582	4.76845	5.71688	6.69582	5.67115	5.77043	6.10839	5.92016	6.34533	6.27369	7.07539	6.50048	6.06372	6.15933	5.81271	6.51065	5.87368	6.50698	5.97741	6.93738
PB.54124.31	Ldlrap1	Ldlrap1-S-31	ISM	1.86468	0	2.75031	0	2.2995	0	0	0	0	0	1.99726	1.80981	0	0	1.64244	0	0	2.01354	0	0	0	0	0	0	0	0	0	0	0	0	0	0	0	0	0	0	0	0	0	0	0	0	0	0	0	0
PB.23968.4	Mphosph8	Mphosph8-S-4	ISM	4.01708	4.00941	2.75031	3.45816	2.94119	3.9099	2.72941	2.68196	0	3.19929	3.00104	3.84979	4.74652	4.2227	3.84685	4.38065	3.56759	4.44696	4.4865	0	0	0	0	0	2.74483	0	2.80904	3.5367	0	0	0	0	0	0	0	0	0	0	0	0	0	0	0	0	0	0
PB.77546.35	Cep70	Cep70-S-35	FSM	1.86468	0	2.11911	0	0	0	0	0	0	0	0	0	0	0	1.64244	1.6832	0	0	0	0	0	0	0	0	0	0	0	0	0	0	0	0	0	0	0	0	0	0	0	0	0	0	0	0	0	0
PB.58330.115	Evi5	Evi5-S-115	ISM	1.86468	0	0	2.16213	0	2.58199	0	0	0	0	0	1.80981	2.04338	0	1.64244	0	0	0	3.19524	0	0	0	0	0	0	0	0	0	0	0	0	0	0	0	0	0	0	0	0	0	0	0	0	0	0	0
PB.24476.56	Npm2	Npm2-S-56	NNC	0	2.67612	2.75031	0	0	0	0	0	0	0	1.99726	1.80981	2.04338	2.13636	2.87192	1.6832	2.15772	0	2.54223	0	0	0	0	0	0	0	0	0	0	0	0	0	0	0	0	0	0	0	0	0	0	0	0	0	0	0
PB.75684.43	Rexo2	Rexo2-S-43	FSM	1.86468	2.04954	0	2.16213	0	1.96174	0	0	0	0	0	0	2.04338	2.13636	2.60293	2.27886	0	0	0	0	0	0	0	0	0	0	0	0	0	0	0	0	0	0	0	0	0	0	0	0	0	0	0	0	0	0
PB.27422.3	Atf4	Atf4-S-3	FSM	0	0	2.11911	0	0	0	0	2.055	0	0	2.62014	1.80981	3.05164	0	1.64244	2.6496	0	0	1.92483	2.84395	2.99065	0	0	3.04884	2.74483	2.71216	0	2.87225	0	0	3.01019	0	3.10739	3.24901	3.13018	3.47019	3.78336	3.63534	0	2.95272	0	0	0	0	0	0
PB.4726.6	Fmn2	Fmn2-S-6	NNC	0	0	0	0	0	0	0	0	0	0	1.99726	2.79287	2.66954	2.13636	3.25834	1.6832	0	0	0	3.50757	3.65835	0	2.97402	3.04884	0	3.37154	0	2.87225	0	0	0	0	0	0	0	0	0	0	0	0	0	0	0	0	0	0
PB.60046.4	Cops6	Cops6-S-4	ISM	1.86468	2.67612	2.11911	2.16213	2.2995	0	0	0	0	0	0	0	0	2.13636	0	1.6832	0	0	0	0	0	0	0	0	0	0	0	0	0	0	0	0	0	0	0	0	0	0	0	0	0	0	0	0	0	0
PB.59626.9	Tyw1	Tyw1-S-9	ISM	0	2.04954	0	0	0	0	0	0	0	0	1.99726	2.41757	0	0	2.23382	0	0	2.01354	1.92483	0	0	0	0	0	0	0	0	0	0	0	0	0	0	0	0	0	0	0	0	0	0	0	0	0	0	0
PB.33295.52	Zfp57	Zfp57-S-52	FSM	0	2.04954	0	0	0	2.58199	0	0	0	2.1791	1.99726	1.80981	2.04338	0	2.23382	2.27886	0	0	0	0	0	0	0	0	0	0	0	0	0	0	0	0	0	0	0	0	0	0	0	0	0	0	0	0	0	0
PB.29874.14	Rnf168	Rnf168-S-14	ISM	1.86468	2.67612	0	0	0	0	0	0	0	0	0	1.80981	0	0	2.87192	3.13174	1.57395	2.63759	0	0	0	0	0	0	2.74483	0	0	0	0	0	0	0	0	0	0	0	0	0	0	0	0	0	0	0	0	0
PB.57286.139	Zar1	Zar1-S-139	ISM	0	0	0	0	0	0	0	0	0	0	1.99726	1.80981	2.66954	0	1.64244	1.6832	0	0	1.92483	0	0	0	0	0	0	0	0	0	0	0	0	0	0	0	0	0	0	0	0	0	0	0	0	0	0	0
PB.63068.47	D6Ertd527e	D6Ertd527e-S-47	FSM	2.85426	0	0	0	2.2995	0	0	0	0	0	0	1.80981	2.66954	3.97556	2.60293	1.6832	0	0	0	0	0	0	0	3.04884	0	0	0	0	0	0	0	0	0	0	0	0	0	0	0	0	0	0	0	0	0	0
PB.4667.69	Dcaf8	Dcaf8-S-69	ISM	1.86468	0	0	0	2.2995	0	0	0	0	0	0	0	2.66954	2.76866	0	2.27886	0	0	0	0	0	0	0	0	0	0	0	0	0	0	0	0	0	0	0	0	0	0	0	0	0	0	0	0	0	0
PB.16682.15	Pnn	Pnn-S-15	FSM	1.86468	3.05837	2.11911	0	3.3289	1.96174	2.09948	0	2.19357	0	3.49177	2.41757	3.32743	0	2.23382	2.6496	2.15772	0	0	0	0	0	0	0	2.74483	2.71216	0	0	0	0	0	0	0	0	0	0	0	0	0	0	0	0	0	0	0	0
PB.33557.6	Mad2l1bp	Mad2l1bp-S-6	ISM	0	2.04954	0	0	0	1.96174	2.09948	2.055	2.19357	2.1791	1.99726	1.80981	0	0	0	0	2.79133	0	0	0	2.99065	3.43962	0	3.04884	0	0	0	0	0	5.09131	3.67839	3.99414	3.77792	4.3214	4.70402	3.47019	0	4.71621	3.78185	0	5.25533	0	3.6987	4.56999	0	0
PB.17446.32	Rbm25	Rbm25-S-32	ISM	1.86468	0	2.11911	0	0	1.96174	2.09948	0	0	0	1.99726	0	0	0	0	1.6832	0	0	0	0	0	0	0	0	0	0	0	0	0	0	0	0	0	0	0	0	0	0	0	0	0	0	0	0	0	0
PB.28636.144	Cbx5	Cbx5-S-144	FSM	0	0	0	0	0	0	0	0	0	0	0	0	0	0	0	1.6832	0	0	0	0	0	0	0	0	0	0	0	0	0	0	0	0	3.10739	3.24901	0	0	0	0	0	0	0	0	0	0	0	0
PB.7708.34	Rnf126	Rnf126-S-34	ISM	0	2.04954	0	2.79601	2.2995	2.96193	2.09948	2.055	0	2.1791	0	0	2.04338	2.13636	0	1.6832	2.15772	0	2.92112	2.84395	2.99065	0	0	0	0	0	0	0	0	0	0	0	0	0	3.80123	0	0	0	0	2.95272	0	0	0	0	0	0
PB.65121.234	Rfpl4	Rfpl4-S-234	FSM	0	2.67612	2.11911	2.16213	2.94119	1.96174	0	0	0	0	1.99726	2.41757	3.32743	0	1.64244	2.27886	0	2.63759	0	0	0	0	0	0	0	0	0	0	0	0	0	0	0	0	0	0	0	0	0	0	0	0	0	0	0	0
PB.2480.4	Dgkd	Dgkd-S-4	ISM	1.86468	0	0	0	0	0	2.09948	2.055	2.19357	0	0	0	2.66954	2.13636	0	0	0	2.01354	0	0	0	0	2.97402	0	0	0	0	0	0	0	0	0	0	0	0	0	0	0	0	0	0	0	0	0	0	0
PB.74312.28	2610044O15Rik8	2610044O15Rik8-S-28	FSM	0	0	0	0	0	0	0	2.055	0	0	0	0	0	0	0	0	0	0	0	0	0	0	0	0	0	0	0	0	0	0	0	0	0	0	0	0	0	0	0	0	0	0	0	0	0	0
PB.35918.200	Paip2	Paip2-S-200	NIC	0	0	0	0	0	0	0	0	0	0	0	0	0	0	0	0	0	0	0	0	0	0	0	0	0	0	2.80904	0	0	0	0	0	0	0	0	0	0	0	0	2.95272	0	0	0	0	4.19825	0
PB.60393.81	Baiap2l1	Baiap2l1-S-81	ISM	1.86468	2.04954	0	0	0	2.58199	0	0	0	0	0	2.41757	2.04338	0	0	2.6496	1.57395	0	0	0	0	0	0	0	0	0	0	0	0	0	0	0	0	0	0	0	0	0	0	0	0	0	0	0	0	0
PB.57284.7	Nfxl1	Nfxl1-S-7	ISM	3.12744	2.67612	2.11911	3.18091	2.94119	2.58199	2.72941	3.55633	3.49252	2.1791	0	2.41757	2.66954	2.13636	0	2.27886	2.52389	2.63759	3.19524	0	0	0	0	0	0	0	0	0	0	0	0	0	0	0	0	0	0	0	0	0	0	0	0	0	0	0
PB.76577.5	Tln2	Tln2-S-5	NNC	1.86468	0	0	0	0	0	0	0	0	0	0	0	2.04338	2.13636	0	2.27886	0	2.01354	0	0	0	0	0	0	0	0	0	0	0	0	0	0	0	0	0	0	0	0	0	0	0	0	0	0	0	0
PB.73029.161	Nae1	Nae1-S-161	ISM	2.85426	2.04954	3.41098	0	2.94119	1.96174	0	2.055	0	0	3.49177	2.79287	3.05164	2.76866	2.60293	3.13174	0	0	0	0	0	0	0	0	0	0	0	0	0	0	0	0	0	0	0	0	0	0	0	0	0	0	0	0	0	0
PB.48101.19	Tpm3	Tpm3-S-19	ISM	1.86468	3.05837	0	0	0	0	0	0	0	0	2.62014	2.41757	2.04338	2.76866	2.60293	2.27886	0	2.63759	0	0	0	0	0	0	0	0	0	0	0	0	0	0	0	0	0	0	0	0	0	0	0	0	0	0	0	0
PB.71284.231	Mtus1	Mtus1-S-231	NNC	0	2.04954	0	0	0	0	0	0	0	0	0	0	0	2.13636	2.23382	2.6496	0	2.01354	0	0	0	0	0	0	0	0	0	0	0	0	0	0	0	0	0	0	0	0	0	0	0	0	0	0	0	0
PB.16866.6	Dmac2l	Dmac2l-S-6	FSM	0	0	0	0	0	0	0	0	0	0	0	0	0	0	0	0	0	0	0	0	0	0	0	0	0	2.71216	0	0	0	0	0	0	0	0	0	0	0	0	0	0	0	0	0	0	0	0
PB.5682.72	Ltv1	Ltv1-S-72	ISM	1.86468	2.04954	0	0	0	0	0	0	0	0	0	0	0	2.13636	2.23382	1.6832	0	0	0	0	0	0	0	0	0	0	0	0	0	0	0	0	0	0	0	0	0	0	0	0	0	0	0	0	0	0
PB.75525.58	Ccdc84	Ccdc84-S-58	ISM	0	2.04954	2.11911	0	0	0	0	0	0	0	1.99726	1.80981	0	2.13636	0	1.6832	0	0	0	0	0	0	0	0	0	0	0	0	0	0	0	0	0	0	0	0	0	0	0	0	0	0	0	0	0	0
PB.35024.2	Gm20939	Gm20939-S-2	NIC	0	0	0	0	0	0	0	0	0	0	0	0	0	0	0	0	0	0	0	0	0	0	0	0	0	0	0	0	0	0	0	0	0	0	0	0	0	0	0	0	0	0	0	0	0	0
PB.68971.121	Arl6ip1	Arl6ip1-S-121	FSM	4.11075	4.62952	4.63989	3.45816	4.76728	4.38767	3.11288	2.055	2.19357	2.1791	4.80408	4.89665	5.49223	5.06158	5.04476	5.62443	2.79133	4.6524	3.98315	0	3.65835	0	2.97402	0	2.74483	2.71216	0	0	0	0	0	0	0	0	0	0	0	0	0	0	0	0	0	0	0	0
PB.66994.4	Prrg2	Prrg2-S-4	FSM	0	0	0	0	0	0	0	0	0	0	0	0	0	0	0	0	1.57395	0	0	0	0	0	0	0	0	0	0	2.87225	0	0	0	0	0	0	0	0	0	0	3.11123	0	0	0	0	0	0	0
PB.36028.7	Zmat2	Zmat2-S-7	ISM	4.41653	4.56122	3.80538	3.45816	4.28708	2.58199	2.09948	3.06435	0	2.1791	4.75047	4.4158	4.40183	3.15298	3.93208	4.62305	2.15772	3.29432	1.92483	2.84395	0	0	0	0	3.40532	0	0	0	0	0	0	0	0	0	3.13018	0	0	0	0	0	0	0	0	0	0	0
PB.14908.10	Birc5	Birc5-S-10	FSM	2.47719	3.33425	4.08749	2.16213	3.82529	2.58199	0	0	0	0	3.49177	2.79287	2.04338	3.15298	2.23382	3.30676	2.15772	0	0	0	0	0	0	0	2.74483	0	0	2.87225	0	0	0	0	0	0	0	0	0	0	0	0	0	0	0	0	0	0
PB.49933.529	Nexn	Nexn-S-529	NIC	1.86468	0	2.11911	0	2.2995	0	0	0	0	0	0	1.80981	0	2.13636	1.64244	1.6832	0	2.01354	1.92483	0	0	0	0	0	0	0	0	0	0	0	0	0	0	0	0	0	0	0	0	0	0	0	0	0	0	0
PB.25648.287	Brix1	Brix1-S-287	FSM	0	0	0	0	0	0	0	0	0	0	1.99726	0	0	0	1.64244	1.6832	0	0	0	0	3.65835	0	0	0	2.74483	2.71216	0	0	0	0	0	0	0	0	0	0	0	0	0	0	0	0	0	0	0	0
PB.24989.14	Lmo7	Lmo7-S-14	NNC	0	0	0	0	2.2995	0	0	0	0	0	1.99726	1.80981	2.66954	3.15298	2.60293	2.6496	0	0	0	0	0	0	0	0	0	0	0	0	0	0	0	0	0	0	0	0	0	0	0	0	0	0	0	0	0	0
PB.63114.15	Gm5577	Gm5577-S-15	NNC	0	0	0	0	0	0	0	0	0	0	1.99726	0	0	0	0	1.6832	0	0	0	0	0	0	0	0	0	0	0	0	0	0	0	0	3.10739	3.24901	0	0	0	0	0	0	0	0	0	0	0	0
PB.58396.2	Gak	Gak-S-2	ISM	0	0	0	0	0	0	2.09948	0	0	0	0	0	0	0	1.64244	0	1.57395	0	0	0	0	0	0	0	0	0	0	0	0	0	0	0	0	3.24901	0	0	0	0	3.11123	0	0	0	0	0	0	0
PB.38679.13	Smarca2	Smarca2-S-13	NIC	1.86468	0	2.75031	0	2.2995	2.58199	0	0	0	0	0	2.79287	2.04338	2.13636	1.64244	2.27886	0	0	0	0	0	0	0	0	2.74483	0	0	0	0	0	0	0	0	0	0	0	0	0	0	0	0	0	0	0	0	0
PB.72320.48	Usp38	Usp38-S-48	ISM	0	0	0	0	0	0	0	0	0	0	0	1.80981	0	0	0	0	0	2.01354	0	2.84395	0	0	0	0	0	0	0	2.87225	0	0	4.35882	0	0	0	0	3.47019	0	0	0	0	0	0	0	0	0	0
PB.34365.36	Myl12a	Myl12a-S-36	NNC	0	0	0	0	0	0	2.09948	0	2.82934	0	0	0	2.04338	2.76866	1.64244	2.6496	0	2.01354	0	0	0	0	0	0	0	0	0	0	0	0	0	0	0	0	0	0	0	0	0	0	0	0	0	0	0	0
PB.64574.58	Eps8	Eps8-S-58	NIC	2.47719	0	0	0	2.2995	0	0	0	0	0	0	0	2.04338	0	2.23382	3.13174	0	0	0	0	0	0	0	0	0	0	0	0	0	0	0	0	0	0	0	0	0	0	0	0	0	0	0	0	0	0
PB.1611.6	Nbeal1	Nbeal1-S-6	ISM	0	2.04954	0	0	0	0	0	2.055	0	0	1.99726	0	0	0	0	2.6496	0	2.01354	0	0	0	0	0	0	0	0	0	0	0	0	0	0	0	0	0	0	0	0	0	0	0	0	0	0	0	0
PB.42964.10	Nat10	Nat10-S-10	FSM	0	2.04954	0	0	0	0	0	0	2.19357	0	0	0	2.04338	0	0	0	0	0	0	0	0	0	0	0	0	0	0	2.87225	0	0	0	3.31925	0	0	0	3.47019	0	0	3.11123	0	0	0	0	0	0	0
PB.61513.33	Bpgm	Bpgm-S-33	FSM	0	2.04954	2.11911	2.16213	2.2995	0	0	0	0	0	1.99726	0	0	0	0	1.6832	0	0	0	0	0	0	0	0	0	0	0	0	0	0	0	0	0	0	0	0	0	0	0	0	0	0	0	0	0	0
PB.23556.47	Ktn1	Ktn1-S-47	ISM	0	0	2.11911	0	0	0	2.09948	0	0	0	3.27621	2.41757	2.04338	0	1.64244	2.27886	0	0	0	0	0	0	0	0	0	0	0	0	0	0	0	0	0	0	0	0	0	0	0	0	0	0	0	0	0	0
PB.24230.2	Pinx1	Pinx1-S-2	FSM	1.86468	2.67612	2.75031	2.16213	3.3289	1.96174	0	0	2.19357	0	1.99726	3.27889	3.32743	3.15298	3.53637	3.45567	0	2.01354	0	0	0	0	0	0	2.74483	0	0	0	0	0	0	0	0	0	0	0	0	0	0	0	0	0	0	0	0	0
PB.56628.122	Lyar	Lyar-S-122	ISM	0	0	0	0	0	0	0	0	0	0	0	2.41757	0	0	1.64244	2.27886	0	0	0	0	0	0	0	3.04884	0	0	0	0	0	0	3.01019	0	0	0	0	0	0	0	0	0	0	0	0	0	0	0
PB.59026.238	Oas1d	Oas1d-S-238	ISM	0	2.04954	2.11911	0	2.2995	1.96174	0	0	0	0	1.99726	0	2.04338	2.13636	0	1.6832	1.57395	0	0	0	0	0	0	0	0	0	0	0	0	0	0	0	0	0	0	0	0	0	0	0	0	0	0	0	0	0
PB.24985.5	Commd6	Commd6-S-5	FSM	0	0	0	0	0	0	0	2.055	0	0	2.62014	0	0	0	2.23382	2.27886	1.57395	2.01354	0	0	0	3.43962	0	3.71799	0	2.71216	0	0	3.94143	0	0	0	0	3.24901	3.13018	0	3.11271	0	0	0	0	0	0	0	0	0
PB.33879.3	Chaf1a	Chaf1a-S-3	ISM	1.86468	3.05837	0	2.16213	2.2995	0	0	0	0	0	3.49177	2.41757	3.32743	2.76866	0	2.91945	0	2.01354	0	0	0	0	0	0	0	0	0	0	0	0	0	0	0	0	0	0	0	0	0	0	0	0	0	0	0	0
PB.40834.60	Brd3	Brd3-S-60	ISM	0	0	0	0	0	0	0	0	0	0	3.00104	1.80981	0	2.13636	2.23382	0	0	2.01354	0	2.84395	3.65835	0	2.97402	0	0	3.37154	0	0	0	0	0	0	0	0	0	0	0	0	0	0	0	0	0	0	0	0
PB.44324.10	Xrn2	Xrn2-S-10	ISM	1.86468	0	0	0	0	0	2.09948	0	2.19357	0	2.62014	2.41757	2.04338	2.13636	0	2.6496	0	2.01354	0	0	0	0	0	0	0	0	0	2.87225	0	0	0	0	0	0	0	0	0	0	0	0	0	0	0	0	0	0
PB.69569.99	Ate1	Ate1-S-99	ISM	0	0	2.11911	0	0	0	0	0	0	0	0	0	2.66954	2.76866	1.64244	2.6496	0	2.01354	0	0	0	3.43962	0	0	0	0	0	0	0	0	0	0	0	0	0	0	0	0	0	0	0	0	0	0	0	0
PB.3376.51	Slc45a3	Slc45a3-S-51	ISM	0	0	0	0	0	0	0	0	0	0	2.62014	0	0	0	3.08368	0	0	0	0	0	0	0	0	0	3.40532	3.37154	2.80904	2.87225	3.94143	0	0	0	0	0	0	0	0	0	0	0	0	0	0	0	0	0
PB.59902.49	Prkrip1	Prkrip1-S-49	ISM	1.86468	0	4.08749	2.16213	2.94119	0	2.72941	2.055	0	0	3.49177	2.41757	3.05164	0	2.87192	3.58524	2.79133	2.01354	1.92483	0	0	0	0	0	0	0	0	0	0	0	0	0	0	0	0	0	0	0	0	0	0	0	0	0	0	0
PB.49929.174	Dnajb4	Dnajb4-S-174	ISM	2.47719	3.05837	0	0	0	0	0	0	0	0	0	2.41757	2.04338	0	0	2.6496	1.57395	2.63759	0	0	0	0	0	0	0	0	0	0	0	0	0	0	0	0	0	0	0	0	0	0	0	0	0	0	0	0
PB.73960.37	Aprt	Aprt-S-37	NIC	0	0	0	0	0	0	0	0	0	0	0	0	0	0	0	0	0	0	0	0	0	0	0	0	0	0	0	0	0	0	3.01019	0	3.10739	0	4.19922	4.83288	0	3.63534	0	2.95272	0	0	0	0	0	0
PB.34207.34	Ankrd12	Ankrd12-S-34	FSM	1.86468	0	0	0	0	0	0	0	2.19357	0	0	0	2.04338	0	2.23382	2.6496	1.57395	3.01892	0	0	0	0	0	0	2.74483	0	0	0	0	0	0	0	0	0	0	0	0	0	0	0	0	0	0	0	0	0
PB.42221.31	Cir1	Cir1-S-31	NIC	0	2.04954	0	0	2.2995	1.96174	2.09948	0	0	0	0	1.80981	3.05164	0	3.25834	3.13174	0	0	0	0	0	0	0	0	0	0	0	0	0	0	0	0	0	0	0	0	0	0	0	0	0	0	0	0	0	0
PB.20139.95	Ninj1	Ninj1-S-95	ISM	3.34178	2.67612	3.6275	4.13543	4.15551	3.9099	3.78354	2.055	4.03901	2.81401	3.81951	1.80981	4.00247	2.13636	3.08368	3.58524	3.92659	3.96874	2.92112	2.84395	0	4.80156	2.97402	3.04884	0	0	3.4716	0	3.94143	0	0	0	3.10739	0	0	0	0	2.96822	3.78185	0	0	0	0	0	0	0
PB.40795.63	Rpl7a	Rpl7a-S-63	FSM	0	0	2.11911	2.16213	0	0	3.11288	0	2.19357	0	0	0	0	2.76866	1.64244	2.6496	0	2.01354	0	0	0	4.1166	0	3.71799	2.74483	0	0	0	0	0	3.67839	0	3.77792	3.24901	3.13018	0	3.11271	0	0	2.95272	3.88458	0	0	4.56999	0	0
PB.13345.66	Luc7l3	Luc7l3-S-66	ISM	3.66809	3.72776	3.41098	2.16213	2.94119	3.9099	0	3.06435	2.82934	2.1791	3.95029	3.60454	4.31593	3.42993	1.64244	3.69994	1.57395	4.28203	3.41016	2.84395	2.99065	0	0	0	0	0	0	0	0	0	0	3.31925	0	0	0	0	0	0	0	0	0	0	0	0	0	0
PB.16680.34	Trappc6b	Trappc6b-S-34	ISM	0	0	0	0	0	1.96174	0	0	0	0	0	1.80981	2.04338	0	0	0	1.57395	0	0	0	0	0	0	0	0	0	0	0	0	0	0	0	0	0	0	0	0	0	0	0	0	0	0	0	0	0
PB.40267.95	Rbm17	Rbm17-S-95	ISM	4.74954	4.75353	4.77221	3.85307	4.84078	2.96193	2.72941	2.68196	3.49252	2.81401	4.50162	5.19198	5.49223	5.10782	2.87192	4.13291	3.17614	4.1881	3.73715	0	0	0	2.97402	0	2.74483	0	2.80904	0	0	0	0	0	3.10739	0	0	3.47019	0	0	0	0	0	0	0	0	0	0
PB.65121.227	Rfpl4	Rfpl4-S-227	FSM	0	2.04954	0	0	0	0	0	0	0	0	1.99726	1.80981	2.04338	2.13636	0	1.6832	0	2.01354	0	2.84395	0	0	0	0	0	0	0	0	0	0	0	0	0	0	0	0	0	0	0	0	0	0	0	0	0	0
PB.61768.33	Wee2	Wee2-S-33	ISM	2.47719	0	0	0	0	0	0	0	0	0	1.99726	1.80981	2.04338	2.13636	0	0	0	0	0	0	0	0	0	0	2.74483	0	0	0	0	0	0	0	0	0	0	0	0	0	0	0	0	0	0	0	0	0
PB.36698.12	Rps14	Rps14-S-12	NIC	0	2.04954	0	0	0	0	0	0	0	0	0	0	0	0	0	0	0	0	0	0	0	0	0	0	0	0	0	0	0	4.4043	0	0	0	0	0	0	0	0	0	0	0	0	0	0	0	0
PB.37123.66	Ska1	Ska1-S-66	ISM	1.86468	0	2.75031	0	0	1.96174	0	0	0	0	1.99726	0	2.04338	0	1.64244	0	0	0	0	0	0	0	0	0	0	0	0	0	0	0	0	0	0	0	0	0	0	0	0	0	0	0	0	0	0	0
PB.52401.62	Jak1	Jak1-S-62	ISM	0	2.04954	0	0	0	0	0	0	0	0	0	0	2.04338	2.76866	1.64244	1.6832	0	0	0	0	0	0	0	0	0	0	0	0	0	0	0	0	0	0	0	0	0	0	0	0	0	0	0	0	0	0
PB.27422.7	Atf4	Atf4-S-7	FSM	0	0	2.11911	0	0	0	0	0	0	0	1.99726	1.80981	0	0	0	1.6832	0	0	0	0	0	0	0	0	0	0	0	0	0	0	0	0	0	0	0	0	0	0	0	0	0	0	0	0	0	0
PB.55014.54	Pik3cd	Pik3cd-S-54	NNC	0	0	0	0	0	1.96174	0	0	2.19357	0	0	1.80981	2.04338	0	1.64244	1.6832	0	0	0	0	0	0	2.97402	0	2.74483	0	0	0	0	0	0	0	0	0	0	0	0	0	0	0	0	0	0	0	0	0
PB.55253.25	Arhgef16	Arhgef16-S-25	ISM	0	0	0	0	2.2995	0	0	0	0	0	0	1.80981	0	2.76866	0	1.6832	1.57395	2.01354	0	0	0	0	0	0	0	0	0	0	0	0	0	0	0	0	0	0	0	0	0	0	0	0	0	0	0	0
PB.49933.528	Nexn	Nexn-S-528	NNC	0	2.67612	0	0	0	1.96174	0	0	0	0	1.99726	0	2.04338	0	1.64244	0	0	2.01354	1.92483	0	0	0	0	0	2.74483	0	0	0	0	0	0	0	0	0	0	0	0	0	0	0	0	0	0	0	0	0
PB.42679.55	Fnbp4	Fnbp4-S-55	NNC	2.47719	0	2.75031	0	2.2995	1.96174	2.09948	0	0	0	1.99726	1.80981	0	2.13636	1.64244	2.27886	1.57395	2.63759	0	0	0	0	2.97402	0	0	0	0	0	0	0	0	0	0	0	0	0	0	0	0	0	0	0	0	0	0	0
PB.19029.56	Ggps1	Ggps1-S-56	FSM	0	0	0	0	0	0	0	0	0	0	0	0	0	0	0	0	0	0	0	0	0	3.43962	0	0	0	0	0	0	0	0	0	0	0	3.24901	0	0	0	0	0	0	3.88458	0	0	0	0	0
PB.44376.1	Gm14139	Gm14139-S-1	FSM	0	0	0	0	0	0	0	0	0	0	0	0	0	0	0	0	0	0	0	0	0	0	0	0	0	0	0	0	0	0	3.01019	0	0	0	0	0	0	2.96822	3.11123	0	0	0	0	0	0	0
PB.17246.54	Atp6v1d	Atp6v1d-S-54	FSM	0	0	0	0	0	0	0	0	0	0	1.99726	0	2.04338	2.76866	2.23382	1.6832	0	2.01354	0	0	0	0	0	0	0	0	0	0	0	0	0	0	0	0	0	0	0	0	0	0	0	0	0	0	0	0
PB.70810.53	Plpp5	Plpp5-S-53	NNC	0	0	0	2.16213	0	1.96174	0	0	0	0	1.99726	1.80981	0	2.13636	0	0	0	2.01354	1.92483	0	0	0	0	0	0	0	0	0	0	0	0	0	0	0	0	0	0	0	0	0	0	0	0	0	0	0
PB.7520.31	Smarcb1	Smarcb1-S-31	ISM	0	0	0	0	0	1.96174	0	0	0	0	0	0	0	0	1.64244	1.6832	1.57395	0	0	0	0	3.43962	0	0	0	0	0	0	0	0	3.01019	0	0	0	0	0	0	0	0	0	0	0	0	0	0	0
PB.58772.4	Cox6a1	Cox6a1-S-4	FSM	0	2.67612	0	0	0	0	2.09948	0	0	0	0	0	0	2.76866	2.23382	2.27886	1.57395	0	0	0	2.99065	0	0	3.04884	2.74483	3.7655	0	0	3.94143	5.09131	4.5794	4.89932	5.46378	4.3214	4.19922	4.83288	4.68591	0	3.78185	4.51951	0	4.12752	3.6987	0	4.19825	0
PB.76152.25	Bbs4	Bbs4-S-25	FSM	2.85426	3.05837	3.41098	3.45816	2.94119	3.77922	2.72941	2.68196	2.19357	2.1791	3.95029	4.04659	4.31593	3.82454	3.25834	4.62305	3.17614	4.44696	3.19524	0	2.99065	0	0	0	0	0	2.80904	2.87225	0	0	0	0	0	0	0	0	0	0	0	0	0	0	0	0	0	0
PB.70896.24	Brf2	Brf2-S-24	ISM	0	2.04954	2.11911	0	2.2995	0	0	0	0	0	0	0	3.05164	2.76866	3.40699	3.69994	1.57395	2.01354	0	0	0	0	0	0	0	0	0	0	0	0	0	0	0	0	0	0	0	0	0	0	0	0	0	0	0	0
PB.3147.6	3110009E18Rik	3110009E18Rik-S-6	NNC	1.86468	0	3.13424	2.79601	2.2995	2.96193	0	0	3.21493	2.1791	1.99726	2.79287	3.32743	0	2.23382	2.27886	2.79133	2.01354	1.92483	0	0	4.1166	4.32124	3.04884	0	0	0	2.87225	0	0	0	0	0	0	0	0	0	0	0	0	0	0	0	0	0	0
PB.42050.2	Ssb	Ssb-S-2	ISM	0	2.04954	0	0	0	1.96174	0	0	0	0	3.00104	1.80981	0	0	1.64244	2.91945	1.57395	0	0	0	0	0	0	0	0	0	0	0	0	0	0	0	0	0	0	0	0	0	0	0	0	0	0	0	0	0
PB.43301.7	Bub1b	Bub1b-S-7	ISM	2.85426	2.04954	0	2.16213	2.94119	1.96174	0	0	0	0	1.99726	0	3.05164	0	1.64244	2.27886	2.15772	2.01354	1.92483	0	0	0	0	0	0	0	0	0	0	0	0	0	0	0	0	0	0	0	0	0	0	0	0	0	0	0
PB.12079.108	Pfn1	Pfn1-S-108	ISM	0	0	0	0	2.2995	0	0	2.055	0	0	0	2.79287	2.66954	0	2.87192	2.6496	2.15772	2.01354	2.54223	0	0	0	0	0	2.74483	0	0	0	0	0	3.01019	0	3.10739	0	0	0	0	3.63534	3.11123	2.95272	0	0	0	0	4.19825	0
PB.74608.44	Med17	Med17-S-44	ISM	0	0	2.75031	0	0	0	0	0	0	0	1.99726	1.80981	0	2.76866	1.64244	2.6496	0	0	0	0	0	0	0	0	0	0	0	0	0	0	0	0	0	0	0	0	0	0	0	0	0	0	0	0	0	0
PB.55435.7	Fam133b	Fam133b-S-7	ISM	1.86468	2.04954	2.11911	0	0	0	2.09948	0	2.19357	0	0	1.80981	3.54337	3.42993	2.87192	3.30676	0	2.01354	2.54223	0	0	0	0	0	0	0	0	0	0	0	0	0	0	0	0	0	0	0	0	0	0	0	0	0	0	0
PB.72741.32	Rpgrip1l	Rpgrip1l-S-32	ISM	2.47719	0	0	2.16213	0	0	0	0	0	0	0	0	2.04338	0	2.23382	0	0	0	0	0	0	0	0	0	0	2.71216	0	0	0	0	0	0	0	0	0	0	0	0	0	0	0	0	0	0	0	0
PB.39533.8	Nolc1	Nolc1-S-8	ISM	1.86468	0	0	0	0	0	0	0	0	0	1.99726	1.80981	3.05164	2.13636	1.64244	2.27886	0	0	0	0	0	0	0	0	0	0	0	0	0	0	0	3.31925	0	0	0	0	0	0	0	0	0	0	0	0	0	0
PB.73513.1	Ctrb1	Ctrb1-S-1	ISM	0	0	0	0	0	0	0	0	0	0	0	0	0	0	0	0	0	0	0	0	0	0	0	0	0	0	0	0	0	4.4043	3.01019	0	3.10739	3.24901	3.80123	4.14766	0	0	0	2.95272	0	0	0	0	0	0
PB.51186.1	Zcchc7	Zcchc7-S-1	ISM	0	0	0	0	0	0	0	0	0	0	1.99726	1.80981	0	0	1.64244	2.6496	0	2.63759	0	0	0	0	0	0	0	0	0	0	0	0	0	0	0	0	0	0	0	0	0	0	0	0	0	0	0	0
PB.16767.43	Mis18bp1	Mis18bp1-S-43	ISM	1.86468	0	0	0	2.2995	1.96174	0	0	0	0	0	0	2.04338	0	0	1.6832	0	0	1.92483	0	0	0	0	0	0	0	0	0	0	0	0	0	0	0	0	0	0	0	0	0	0	0	0	0	0	0
PB.31443.16	A630089N07Rik	A630089N07Rik-S-16	ISM	0	0	0	0	0	0	0	0	0	0	0	0	0	0	0	0	0	0	0	0	0	0	0	0	0	0	0	0	0	0	0	0	0	0	0	0	0	0	0	0	0	0	0	0	0	0
PB.72906.24	Sap18b	Sap18b-S-24	FSM	1.86468	0	2.11911	0	0	0	0	0	0	0	1.99726	1.80981	2.04338	2.76866	2.23382	1.6832	0	0	0	0	0	0	0	0	0	0	0	0	0	0	0	0	0	0	0	0	0	0	0	0	0	0	0	0	0	0
PB.49933.568	Nexn	Nexn-S-568	ISM	1.86468	2.67612	0	3.18091	3.60758	0	2.72941	0	0	0	3.66901	2.79287	4.00247	3.15298	3.08368	3.69994	0	4.52023	0	0	0	0	0	0	0	2.71216	0	0	0	0	0	0	0	0	0	0	0	0	0	0	0	0	0	0	0	0
PB.20893.175	Gm10324	Gm10324-S-175	FSM	0	0	0	0	0	0	0	0	0	0	0	1.80981	0	0	0	0	0	0	0	0	0	0	0	0	0	0	0	0	0	0	0	0	0	0	0	0	0	0	0	0	0	0	0	0	0	0
PB.27422.2	Atf4	Atf4-S-2	FSM	0	0	0	0	0	0	0	0	0	2.1791	0	0	0	0	0	0	0	0	0	2.84395	0	0	0	0	0	0	0	0	0	0	3.01019	3.31925	0	0	3.13018	3.47019	0	0	3.11123	0	0	0	0	0	0	0
PB.77728.42	Tmem108	Tmem108-S-42	ISM	0	0	0	0	0	0	0	0	0	0	1.99726	1.80981	0	0	1.64244	0	0	0	0	2.84395	0	0	2.97402	0	0	0	0	0	0	0	0	0	0	0	0	0	0	0	0	0	0	0	0	0	0	0
PB.43572.21	Eif3j1	Eif3j1-S-21	ISM	1.86468	0	0	0	0	1.96174	0	0	2.19357	0	1.99726	1.80981	2.04338	0	1.64244	2.6496	1.57395	0	1.92483	0	0	0	0	0	0	0	0	0	0	0	0	0	0	0	0	0	0	0	0	0	0	0	0	0	0	0
PB.18355.239	Hsp90aa1	Hsp90aa1-S-239	ISM	1.86468	2.04954	0	0	0	0	2.09948	0	2.19357	0	1.99726	2.41757	2.04338	3.15298	2.23382	2.6496	0	0	0	0	0	0	0	0	0	0	0	0	0	0	0	0	0	0	0	0	0	0	0	0	0	0	0	0	0	0
PB.480.66	Khdc1c	Khdc1c-S-66	FSM	1.86468	0	0	0	0	0	0	0	0	0	0	2.41757	0	2.13636	2.23382	0	0	0	0	0	0	0	0	0	0	2.71216	0	0	0	4.4043	0	3.31925	3.77792	0	0	0	0	0	0	2.95272	0	0	0	0	0	0
PB.35826.9	Pkd2l2	Pkd2l2-S-9	NNC	4.1964	4.22892	5.04213	3.85307	4.28708	3.62887	3.38938	3.73388	2.82934	0	4.69382	5.00508	5.20592	5.31149	5.36389	5.62443	2.52389	4.5885	4.08665	3.50757	0	0	2.97402	0	3.40532	0	3.4716	0	0	0	0	0	0	0	0	0	0	0	0	0	0	0	0	0	0	0
PB.56628.13	Lyar	Lyar-S-13	ISM	1.86468	4.00941	0	0	0	0	2.09948	0	0	0	3.49177	1.80981	3.05164	0	1.64244	2.6496	0	0	0	0	0	0	0	0	0	0	2.80904	0	0	0	0	0	0	0	0	0	0	0	0	0	0	0	0	0	0	0
PB.1569.3	Nop58	Nop58-S-3	ISM	2.85426	0	2.11911	0	2.2995	2.58199	0	0	0	2.81401	1.99726	1.80981	2.66954	2.13636	0	3.13174	0	2.63759	2.54223	0	0	0	0	0	0	0	0	0	0	0	0	0	0	0	0	0	0	0	0	0	0	0	0	0	0	0
PB.34160.28	Tmem232	Tmem232-S-28	NNC	0	0	2.11911	2.16213	0	0	0	0	0	0	0	2.41757	2.04338	0	0	2.27886	0	0	0	0	0	0	0	0	0	0	0	0	0	0	0	0	0	0	0	0	0	0	0	0	0	0	0	0	0	0
PB.15348.169	Ubxn2a	Ubxn2a-S-169	ISM	0	0	0	0	0	0	0	0	0	0	0	0	0	0	0	0	0	0	0	0	0	0	0	0	0	0	0	0	0	0	3.01019	0	0	0	0	0	3.78336	0	0	2.95272	0	0	0	0	0	0
PB.53867.78	Dnajc8	Dnajc8-S-78	FSM	2.47719	0	0	0	0	0	0	0	0	0	0	1.80981	2.04338	0	1.64244	1.6832	0	0	0	0	0	0	0	0	2.74483	0	0	0	0	0	0	0	0	0	0	0	0	0	0	0	0	0	0	0	0	0
PB.55839.83	Dnajc2	Dnajc2-S-83	FSM	0	2.67612	0	0	0	0	0	0	0	0	1.99726	0	2.04338	0	1.64244	2.27886	0	0	1.92483	0	0	0	0	0	0	0	0	0	0	0	0	0	0	0	0	0	0	0	0	0	0	0	0	0	0	0
PB.28861.36	Carhsp1	Carhsp1-S-36	ISM	0	0	0	0	2.2995	0	0	0	0	0	0	0	0	0	0	0	0	0	1.92483	0	0	0	0	0	0	0	0	0	0	0	0	0	0	0	0	0	0	0	0	0	0	0	0	0	0	0
PB.21014.34	Gm48423	Gm48423-S-34	FSM	0	0	0	0	0	0	0	0	0	0	0	0	0	0	0	0	0	0	0	0	0	3.43962	0	0	0	2.71216	0	0	0	0	0	0	0	0	0	0	0	0	0	0	0	0	0	3.88715	0	0
PB.66335.4	Fam98c	Fam98c-S-4	FSM	0	0	0	0	0	0	0	0	0	0	0	0	0	0	0	0	0	0	0	0	0	0	0	0	0	0	0	0	0	0	0	0	0	0	0	0	0	0	0	0	0	4.12752	0	0	0	0
PB.19746.125	Riok1	Riok1-S-125	NIC	0	0	0	0	0	0	0	0	0	0	2.62014	1.80981	2.04338	2.13636	1.64244	0	0	2.01354	0	0	0	0	0	0	0	0	0	0	0	0	0	0	0	0	0	0	0	0	0	0	0	0	0	0	0	0
PB.35880.126	Hspa9	Hspa9-S-126	ISM	2.47719	0	0	0	2.2995	0	2.09948	2.055	0	0	0	0	2.04338	0	1.64244	1.6832	0	2.01354	0	0	0	0	0	0	0	0	0	0	0	0	0	0	0	0	0	0	0	0	0	0	0	0	0	0	0	0
PB.5516.5	Ppil4	Ppil4-S-5	ISM	1.86468	2.67612	0	2.16213	3.3289	2.58199	0	0	2.19357	0	2.62014	3.27889	3.32743	2.13636	2.87192	3.45567	2.15772	2.01354	2.54223	0	0	0	0	0	0	0	0	0	0	0	0	0	0	0	0	0	0	0	0	0	0	0	0	0	0	0
PB.14423.16	Psmd12	Psmd12-S-16	FSM	0	0	0	0	0	0	0	0	0	0	2.62014	0	0	0	0	0	0	0	0	0	0	0	0	0	0	0	0	2.87225	0	0	0	0	0	0	0	0	0	0	3.11123	0	0	0	0	0	0	0
PB.10770.306	Mat2b	Mat2b-S-306	NNC	1.86468	2.04954	2.75031	2.16213	0	1.96174	0	0	0	0	2.62014	0	0	3.97556	0	2.6496	1.57395	0	1.92483	0	0	0	0	0	0	0	0	0	0	0	0	0	0	0	0	0	0	0	0	0	0	0	0	0	0	0
PB.59026.50	Oas1h	Oas1h-S-50	ISM	3.12744	3.05837	3.13424	0	2.2995	0	0	0	0	2.81401	2.62014	2.79287	2.04338	2.13636	1.64244	3.30676	0	0	0	0	0	0	0	0	2.74483	0	0	0	0	0	0	0	0	0	0	0	0	2.96822	0	0	0	0	0	0	0	0
PB.43746.63	Blvra	Blvra-S-63	NNC	0	0	0	2.16213	2.2995	0	0	0	0	0	0	0	0	2.13636	1.64244	0	1.57395	0	1.92483	0	0	0	0	0	0	0	0	0	0	0	0	0	0	0	0	0	0	0	0	0	0	0	0	0	0	0
PB.24476.54	Npm2	Npm2-S-54	ISM	5.82641	5.80649	6.26968	5.09056	6.48578	5.42554	4.61775	3.73388	3.70956	3.19929	5.8433	5.56671	5.96759	6.10728	5.36389	6.15264	3.99929	4.96825	4.72052	2.84395	0	0	0	0	4.88324	0	0	0	0	0	0	0	0	0	0	0	0	0	0	0	0	0	0	0	0	0
PB.77408.64	Tfdp2	Tfdp2-S-64	ISM	0	2.04954	0	2.16213	0	0	0	0	0	0	2.62014	1.80981	0	2.13636	0	1.6832	0	0	1.92483	0	0	0	0	0	0	0	0	0	0	0	0	0	0	0	0	0	0	0	0	0	0	0	0	0	0	0
PB.79504.1	Ndufa1	Ndufa1-S-1	FSM	3.51819	3.05837	3.6275	3.45816	3.3289	4.22287	4.18139	0	3.70956	3.47672	3.00104	3.45491	5.00237	0	3.08368	4.32423	3.84819	3.01892	4.08665	2.84395	3.65835	4.1166	4.03797	0	4.08173	5.59163	5.05587	5.21734	5.02701	5.78138	4.07539	4.39345	5.46378	4.60576	4.48314	4.14766	4.18122	2.96822	4.68438	4.01592	4.96939	5.21533	5.46962	5.48004	0	0
PB.24201.53	Fdft1	Fdft1-S-53	ISM	0	2.04954	0	0	0	0	0	2.68196	0	0	1.99726	1.80981	2.04338	0	0	1.6832	0	2.01354	0	0	0	0	0	0	0	0	0	2.87225	0	0	0	0	0	0	0	0	0	0	0	0	0	0	0	0	0	0
PB.54817.157	Gm21411	Gm21411-S-157	FSM	0	0	0	0	0	0	0	0	0	0	0	0	0	0	0	0	0	0	0	0	0	0	0	0	0	0	0	0	0	0	0	0	0	0	0	0	0	0	0	0	0	0	0	0	0	0
PB.82135.39	Ofd1	Ofd1-S-39	ISM	1.86468	0	0	0	2.2995	0	0	0	0	2.1791	0	0	2.04338	0	2.60293	1.6832	0	2.01354	0	0	0	0	0	0	0	0	0	0	0	0	0	0	0	0	0	0	0	0	0	0	0	0	0	0	0	0
PB.67005.204	Rpl13a	Rpl13a-S-204	ISM	0	0	0	2.16213	0	0	0	0	0	0	0	1.80981	0	2.13636	0	2.6496	0	0	0	0	0	0	0	0	0	0	0	0	0	0	0	0	0	0	0	0	0	0	0	0	0	0	0	0	0	0
PB.24746.177	Wbp4	Wbp4-S-177	ISM	0	2.67612	2.11911	0	0	1.96174	0	0	2.19357	0	0	1.80981	0	0	1.64244	1.6832	0	2.01354	1.92483	0	0	0	0	0	0	0	0	0	0	0	0	0	0	0	0	0	0	0	0	0	0	0	0	0	0	0
PB.18444.150	Eif5	Eif5-S-150	ISM	0	2.04954	2.11911	0	0	0	0	0	0	0	0	2.41757	0	2.13636	1.64244	0	0	0	0	0	0	0	0	0	2.74483	0	0	0	0	0	0	0	0	0	0	0	0	0	0	0	0	0	0	0	0	0
PB.74767.154	Dnmt1	Dnmt1-S-154	NIC	3.66809	4.12518	4.56652	3.18091	4.00396	3.77922	2.09948	0	3.21493	0	5.03599	4.68485	4.55422	4.85177	4.43503	5.75751	3.67013	4.52023	3.19524	0	0	0	0	0	2.74483	0	0	2.87225	0	0	0	0	0	0	0	0	0	0	0	0	0	0	0	0	0	0
PB.42029.11	Bbs5	Bbs5-S-11	ISM	1.86468	2.67612	0	0	0	2.58199	2.09948	0	0	0	0	0	0	0	0	1.6832	1.57395	0	0	0	0	0	0	0	0	0	0	0	3.94143	0	0	0	0	0	0	0	0	0	0	0	0	0	0	0	0	0
PB.26397.116	Rspo2	Rspo2-S-116	ISM	0	0	2.11911	0	0	0	0	0	0	0	2.62014	2.41757	0	0	0	2.6496	0	0	1.92483	0	0	0	0	0	0	0	0	0	0	0	0	0	0	0	0	0	0	0	0	0	0	0	0	0	0	0
PB.18355.236	Hsp90aa1	Hsp90aa1-S-236	ISM	0	0	0	0	0	1.96174	0	0	0	0	0	0	0	2.13636	1.64244	1.6832	0	0	0	0	0	0	0	0	0	0	2.80904	0	0	0	0	0	0	0	0	0	0	0	0	0	0	0	0	0	0	0
PB.4057.2	E330020D12Rik	E330020D12Rik-S-2	FSM	0	0	0	0	0	0	0	0	0	0	0	1.80981	0	0	1.64244	0	0	0	0	0	0	0	0	0	2.74483	2.71216	0	2.87225	0	0	0	0	0	0	0	0	0	0	0	0	0	0	0	0	0	0
PB.46688.8	Fxr1	Fxr1-S-8	ISM	2.85426	2.04954	2.11911	0	2.2995	0	2.72941	0	0	0	1.99726	1.80981	3.05164	2.13636	0	3.89611	1.57395	3.01892	1.92483	0	0	0	0	0	2.74483	0	0	0	0	0	0	0	0	0	0	0	0	0	0	0	0	0	0	0	0	0
PB.11272.2	Gpx3	Gpx3-S-2	NNC	3.34178	2.04954	3.13424	0	0	0	2.09948	2.055	2.19357	3.19929	1.99726	1.80981	0	2.13636	0	0	2.15772	2.63759	2.92112	0	0	3.43962	0	0	0	0	0	0	0	0	0	0	3.10739	0	0	0	0	2.96822	4.1797	0	0	0	0	0	0	0
PB.47397.5	Tiparp	Tiparp-S-5	ISM	3.12744	4.40881	3.13424	2.16213	0	3.23659	2.09948	2.055	3.49252	2.81401	2.62014	3.84979	3.72086	4.32659	4.21485	4.818	3.00213	2.01354	2.92112	0	2.99065	0	0	0	0	0	0	2.87225	0	0	0	0	0	0	0	0	0	0	0	0	0	0	0	0	0	0
PB.59626.14	Tyw1	Tyw1-S-14	ISM	1.86468	0	0	0	0	0	0	0	0	0	0	1.80981	0	2.13636	1.64244	0	0	2.01354	0	0	0	0	0	0	0	0	0	0	0	0	0	0	0	0	0	0	0	0	0	0	0	0	0	0	0	0
PB.1924.192	Pecr	Pecr-S-192	ISM	0	0	2.75031	0	2.94119	0	0	0	0	0	1.99726	0	0	0	0	2.27886	0	0	0	0	0	0	0	0	0	0	0	0	3.94143	0	0	0	0	0	0	0	0	0	0	0	0	0	0	0	0	0
PB.24476.51	Npm2	Npm2-S-51	ISM	0	0	0	0	0	0	0	0	0	0	1.99726	0	0	0	1.64244	2.27886	0	0	0	2.84395	0	0	0	0	2.74483	2.71216	0	0	0	0	0	0	0	0	0	0	0	0	0	0	0	0	0	0	0	0
PB.12804.4	Zfp830	Zfp830-S-4	FSM	0	2.67612	2.11911	0	0	2.96193	0	0	0	0	0	2.41757	2.04338	2.76866	2.60293	2.91945	0	2.01354	1.92483	0	2.99065	0	0	0	0	0	0	0	0	0	0	0	0	0	0	0	0	0	0	0	0	0	0	0	0	0
PB.63871.84	Bms1	Bms1-S-84	ISM	0	0	0	2.16213	0	0	0	0	0	0	3.00104	0	3.32743	0	1.64244	3.13174	0	0	0	0	0	0	0	0	2.74483	0	0	0	0	0	0	0	0	0	0	0	0	0	0	0	0	0	0	0	0	0
PB.77663.1	Anapc13	Anapc13-S-1	FSM	1.86468	2.04954	2.75031	0	2.2995	0	2.09948	0	0	0	2.62014	1.80981	0	2.76866	3.08368	4.13291	1.57395	0	0	0	0	0	0	3.04884	0	4.04737	2.80904	3.5367	0	4.4043	4.07539	0	4.17573	3.92256	3.13018	0	3.11271	4.53568	4.68438	4.29908	3.88458	5.21533	3.6987	4.56999	4.88385	0
PB.55298.69	Ski	Ski-S-69	NNC	0	2.04954	2.75031	2.16213	0	0	0	0	0	0	1.99726	0	2.04338	0	0	0	0	0	0	0	0	0	0	0	0	0	0	0	0	0	0	0	0	0	0	0	0	0	0	0	0	0	0	0	0	0
PB.2271.9	Mff	Mff-S-9	NIC	0	0	2.75031	2.16213	0	0	0	0	0	0	0	1.80981	0	2.76866	0	0	0	0	0	0	0	0	0	0	0	0	0	0	0	0	0	0	0	0	0	0	0	0	0	0	0	0	0	0	0	0
PB.52981.59	Rps8	Rps8-S-59	ISM	3.51819	4.12518	4.30727	3.45816	2.2995	3.45185	3.11288	3.06435	2.19357	2.1791	4.34932	3.45491	3.54337	3.97556	2.87192	4.78193	3.67013	3.29432	1.92483	0	2.99065	0	2.97402	3.04884	2.74483	0	0	0	0	0	0	0	3.10739	3.24901	0	0	0	0	0	2.95272	0	0	0	0	0	0
PB.7300.25	Arid5b	Arid5b-S-25	NNC	0	0	2.11911	0	2.2995	0	0	0	0	0	0	1.80981	0	0	0	2.27886	0	0	0	0	0	0	0	0	0	0	2.80904	0	0	0	0	0	0	0	0	0	0	0	0	0	0	0	0	0	0	0
PB.70566.5	Agpat5	Agpat5-S-5	FSM	0	0	0	0	0	0	0	0	0	0	0	0	0	0	0	0	2.15772	2.01354	1.92483	0	0	0	0	0	2.74483	0	0	0	0	0	0	0	0	4.3214	3.80123	0	0	2.96822	3.78185	0	3.88458	0	4.78067	0	0	0
PB.23719.413	Hnrnpc	Hnrnpc-S-413	ISM	3.12744	3.87847	4.08749	2.79601	3.82529	3.23659	0	2.055	0	0	3.49177	2.79287	3.87154	2.76866	3.75367	3.89611	2.52389	0	1.92483	0	0	0	0	0	3.40532	0	0	0	0	0	0	0	0	0	0	0	0	0	0	0	0	0	0	0	0	0
PB.49262.7	Dnttip2	Dnttip2-S-7	ISM	2.47719	2.04954	0	0	0	0	0	0	0	0	2.62014	2.79287	2.66954	2.13636	2.87192	3.13174	0	0	0	0	0	0	0	0	0	0	0	0	0	0	0	0	0	0	0	0	0	0	0	0	0	0	0	0	0	0
PB.16546.80	Baz1a	Baz1a-S-80	NNC	2.47719	2.04954	0	2.79601	0	1.96174	0	0	0	2.1791	0	2.41757	0	3.15298	0	2.6496	2.52389	2.63759	0	0	0	0	0	0	0	0	0	0	0	0	3.67839	3.31925	3.77792	3.24901	3.13018	0	0	0	0	0	0	0	3.6987	3.88715	4.19825	0
PB.62603.31	Immt	Immt-S-31	FSM	1.86468	0	0	0	0	0	2.72941	0	0	0	0	0	0	0	0	1.6832	1.57395	2.01354	0	0	0	0	0	0	0	0	0	0	0	0	0	0	0	0	0	0	0	0	0	0	0	0	0	0	0	0
PB.13707.47	Med1	Med1-S-47	FSM	0	0	0	0	0	0	0	0	0	0	0	0	0	0	1.64244	0	0	0	0	2.84395	0	0	0	0	2.74483	0	2.80904	0	0	0	0	0	0	0	0	0	0	0	0	0	0	0	0	0	0	0
PB.53730.91	Zcchc17	Zcchc17-S-91	NIC	1.86468	0	2.75031	2.16213	2.2995	0	0	0	0	0	0	0	2.04338	0	0	2.27886	0	2.01354	0	0	0	0	0	0	0	0	0	0	0	0	0	0	0	0	0	0	0	0	0	0	0	0	0	0	0	0
PB.8763.73	Nap1l1	Nap1l1-S-73	ISM	0	0	2.11911	0	0	0	0	0	0	0	1.99726	0	2.04338	2.76866	0	2.27886	0	0	0	0	0	0	0	0	0	0	0	0	0	0	0	0	0	0	0	0	0	0	0	0	0	0	0	0	0	0
PB.71752.598	Trim61	Trim61-S-598	FSM	0	2.04954	0	0	0	0	0	0	0	0	1.99726	1.80981	2.04338	2.13636	2.23382	2.27886	0	0	0	0	2.99065	0	0	0	3.79966	0	0	0	0	0	0	0	0	0	0	0	0	0	0	0	0	0	0	0	0	0
PB.6863.53	Gcc2	Gcc2-S-53	FSM	0	2.04954	0	0	0	1.96174	0	0	0	0	1.99726	0	0	2.13636	1.64244	1.6832	0	0	0	2.84395	0	0	0	0	0	0	0	0	0	0	0	0	0	0	0	0	0	0	0	0	0	0	0	0	0	0
PB.3756.37	Aspm	Aspm-S-37	NIC	1.86468	2.04954	2.11911	0	0	1.96174	0	0	0	0	0	0	2.66954	3.15298	0	1.6832	0	0	0	0	0	0	0	0	0	0	0	0	0	0	0	0	0	0	0	0	0	0	0	0	0	0	0	0	0	0
PB.24547.53	Gm49164	Gm49164-S-53	FSM	4.34839	4.12518	4.70823	4.53555	4.40333	2.96193	4.75005	4.81643	4.64989	4.70716	4.06593	4.21095	3.72086	3.64657	3.25834	3.98142	4.29984	4.1881	4.41831	2.84395	4.73963	0	0	4.80028	0	2.71216	3.86665	4.21519	3.94143	0	0	0	0	0	0	0	0	0	0	0	0	0	0	0	0	0
PB.57013.46	Rell1	Rell1-S-46	ISM	0	2.04954	0	0	0	0	0	2.055	0	2.1791	1.99726	1.80981	3.05164	3.15298	0	2.91945	0	0	1.92483	0	0	0	0	0	2.74483	0	0	0	0	0	0	0	0	0	0	0	0	0	0	0	0	0	0	0	0	0
PB.30452.34	Dzip3	Dzip3-S-34	NNC	0	0	0	0	2.2995	0	0	0	0	0	0	0	2.04338	2.13636	0	2.6496	1.57395	0	0	0	0	0	0	0	0	0	0	0	0	0	0	0	0	0	0	0	0	0	0	0	0	0	0	0	0	0
PB.4798.136	Adss	Adss-S-136	ISM	3.91372	3.55023	3.95635	0	3.82529	2.58199	2.09948	0	0	0	3.81951	3.60454	4.11822	4.65928	3.40699	4.38065	2.52389	3.96874	1.92483	0	0	0	0	0	3.40532	0	0	0	0	0	0	0	0	0	0	0	0	0	0	0	0	0	0	0	0	0
PB.54849.205	Zfp979	Zfp979-S-205	FSM	0	0	0	0	0	0	0	2.055	0	0	0	0	0	0	0	0	0	0	0	0	0	0	0	0	0	0	0	0	0	0	0	0	3.10739	0	0	0	0	0	0	0	0	0	0	0	0	0
PB.26120.8	Erich5	Erich5-S-8	ISM	0	0	0	0	0	0	0	2.055	0	0	2.62014	1.80981	2.04338	0	0	2.91945	0	0	0	0	0	0	0	0	0	0	0	0	0	0	0	0	0	0	0	0	0	0	0	0	0	0	0	0	0	0
PB.37043.3	Mbd2	Mbd2-S-3	FSM	0	0	2.75031	0	0	0	2.09948	0	2.19357	0	1.99726	1.80981	2.04338	0	0	0	0	0	1.92483	2.84395	0	3.43962	4.03797	0	0	3.37154	0	3.5367	0	0	0	0	0	0	0	0	0	0	0	0	0	0	0	0	0	0
PB.81746.20	Ribc1	Ribc1-S-20	ISM	0	0	2.11911	0	0	0	0	0	0	0	2.62014	0	2.66954	0	0	1.6832	2.15772	0	0	0	0	0	0	0	0	0	0	0	0	0	0	0	0	0	0	0	0	0	0	0	0	0	0	0	0	0
PB.61896.181	Cul1	Cul1-S-181	ISM	0	0	2.11911	0	0	0	0	0	0	0	1.99726	0	0	0	1.64244	0	1.57395	0	0	0	0	0	0	0	0	0	0	0	3.94143	0	0	0	0	0	0	0	0	0	0	0	0	0	0	0	0	0
PB.58824.47	Cit	Cit-S-47	ISM	2.47719	2.04954	0	0	0	1.96174	0	0	0	0	2.62014	3.27889	3.32743	2.76866	1.64244	2.6496	1.57395	2.01354	0	0	0	0	0	0	0	0	0	0	0	0	0	0	0	0	0	0	0	0	0	0	0	0	0	0	0	0
PB.44836.203	Dsn1	Dsn1-S-203	ISM	2.47719	4.00941	2.75031	0	2.2995	0	2.09948	0	0	0	2.62014	0	4.00247	2.13636	3.75367	3.80283	0	2.63759	0	0	0	0	0	0	0	0	0	0	0	0	0	0	0	0	0	0	0	0	0	0	0	0	0	0	0	0
PB.13849.17	Klhl10	Klhl10-S-17	NNC	0	0	0	0	0	0	0	0	0	0	0	0	0	0	0	0	0	0	0	0	0	0	0	0	0	0	0	0	0	0	4.76001	0	0	3.24901	0	4.14766	0	3.63534	3.78185	0	0	4.12752	3.6987	3.88715	4.19825	0
PB.958.13	Eif5b	Eif5b-S-13	ISM	4.01708	4.56122	4.63989	3.45816	4.28708	4.22287	3.78354	2.055	3.49252	2.81401	4.56988	4.47572	5.2421	4.79163	4.2746	5.06752	2.79133	5.13423	4.72052	0	2.99065	0	0	3.04884	3.79966	0	2.80904	0	0	4.4043	0	0	3.10739	0	0	0	0	0	0	2.95272	0	0	0	0	0	0
PB.43835.50	Zc3h8	Zc3h8-S-50	ISM	1.86468	2.04954	0	2.16213	3.3289	0	0	0	0	0	0	0	2.04338	0	2.23382	2.6496	0	2.01354	2.54223	0	0	0	0	0	0	0	0	0	0	0	0	0	0	0	0	0	0	0	0	0	0	0	0	0	0	0
PB.21590.92	Zbed3	Zbed3-S-92	FSM	1.86468	0	2.11911	0	0	0	0	0	0	0	3.00104	2.79287	2.66954	2.76866	0	2.6496	1.57395	0	0	0	0	0	0	0	0	0	0	0	0	0	0	0	0	0	0	0	0	0	0	0	0	0	0	0	0	0
PB.70852.6	Thap1	Thap1-S-6	FSM	1.86468	0	0	0	0	1.96174	0	0	0	0	0	0	0	0	2.23382	0	0	0	0	0	3.65835	0	0	0	0	0	2.80904	0	3.94143	0	0	0	0	0	0	0	0	0	0	0	0	0	0	0	0	0
PB.33295.45	Zfp57	Zfp57-S-45	FSM	0	0	0	0	0	0	0	0	0	0	2.62014	2.41757	0	2.13636	2.23382	0	1.57395	2.01354	1.92483	0	0	0	0	0	0	0	0	0	0	0	0	0	0	0	0	0	0	0	0	0	0	0	0	0	0	0
PB.53942.1	Wasf2	Wasf2-S-1	ISM	3.34178	3.87847	3.13424	2.79601	3.60758	1.96174	2.09948	0	2.82934	0	2.62014	3.27889	4.22195	3.42993	3.53637	4.53301	2.15772	2.01354	1.92483	0	0	0	2.97402	0	2.74483	0	0	0	0	0	0	0	0	0	0	0	0	0	0	0	0	0	0	0	0	0
PB.42036.65	Ppig	Ppig-S-65	ISM	2.47719	0	0	0	0	1.96174	0	0	0	0	1.99726	2.79287	2.04338	2.76866	1.64244	1.6832	0	2.01354	0	0	0	0	0	0	0	0	0	0	0	0	0	0	0	0	0	0	0	0	0	0	0	0	0	0	0	0
PB.7592.15	Pofut2	Pofut2-S-15	NNC	0	0	0	2.79601	2.94119	0	2.09948	2.055	0	2.81401	0	2.41757	2.04338	2.13636	1.64244	2.27886	2.15772	2.63759	2.54223	0	3.65835	0	0	3.04884	0	0	0	3.5367	0	0	0	0	0	0	0	0	0	0	0	2.95272	0	0	0	0	0	0
PB.32717.6	Rnf8	Rnf8-S-6	ISM	0	0	2.11911	2.16213	0	0	2.09948	0	0	0	0	2.41757	2.66954	0	1.64244	2.6496	0	0	0	0	0	0	0	0	0	0	0	0	0	0	0	0	0	0	0	0	0	0	0	0	0	0	0	0	0	0
PB.20909.197	2410141K09Rik	2410141K09Rik-S-197	FSM	0	0	0	0	0	0	0	0	0	0	0	0	0	0	0	0	0	0	0	0	0	0	0	0	0	0	0	0	0	0	0	0	0	0	0	0	0	0	0	0	0	0	0	0	0	0
PB.24750.8	Sugt1	Sugt1-S-8	ISM	1.86468	3.72776	3.6275	2.16213	2.2995	0	0	0	2.19357	0	3.49177	3.27889	3.05164	2.76866	2.23382	4.06003	1.57395	0	1.92483	0	2.99065	0	0	0	0	0	0	0	0	0	0	0	0	0	0	0	0	0	0	2.95272	0	0	0	0	0	0
PB.26275.123	Rrm2b	Rrm2b-S-123	ISM	1.86468	0	2.11911	0	2.2995	0	0	0	0	0	1.99726	2.41757	2.66954	0	0	0	0	2.01354	0	0	0	0	0	0	0	0	0	0	0	0	0	0	0	0	0	0	0	0	0	0	0	0	0	0	0	0
PB.13301.121	Utp18	Utp18-S-121	ISM	0	0	0	0	0	2.58199	0	2.055	0	0	2.62014	1.80981	3.05164	0	2.23382	2.91945	0	2.01354	1.92483	0	0	0	0	0	0	0	0	0	0	0	0	0	0	0	0	0	0	0	0	0	0	0	0	0	0	0
PB.43394.2	Rtf1	Rtf1-S-2	ISM	0	0	0	0	0	0	0	0	0	0	2.62014	1.80981	3.32743	2.13636	2.87192	2.6496	0	0	3.19524	0	0	0	0	0	0	0	0	0	0	0	0	0	0	0	0	0	0	0	0	0	0	0	0	0	0	0
PB.76966.23	Elovl5	Elovl5-S-23	ISM	1.86468	2.04954	0	2.16213	0	0	0	2.055	0	0	0	0	0	2.13636	0	1.6832	1.57395	0	1.92483	0	0	0	0	0	0	0	0	0	0	0	0	0	0	0	0	0	0	0	0	0	0	0	0	0	0	0
PB.23556.53	Ktn1	Ktn1-S-53	ISM	0	3.87847	3.13424	2.16213	2.2995	2.96193	3.11288	2.055	2.19357	0	3.49177	3.27889	3.72086	2.76866	3.25834	4.43406	2.15772	3.51002	2.54223	0	0	0	0	0	0	0	0	0	0	0	0	0	0	0	0	0	0	0	0	0	0	0	0	0	0	0
PB.47123.106	Exosc8	Exosc8-S-106	ISM	0	2.04954	2.75031	0	0	0	0	0	0	0	0	1.80981	2.66954	0	1.64244	0	0	0	0	0	0	0	0	0	0	0	0	0	0	0	0	0	0	0	0	0	0	0	0	0	0	0	0	0	0	0
PB.41077.160	BC005624	BC005624-S-160	ISM	1.86468	0	0	0	0	0	0	0	0	0	0	0	0	0	1.64244	1.6832	1.57395	2.01354	0	0	0	0	0	0	0	0	0	0	0	0	0	0	0	0	0	0	0	0	0	0	0	0	0	0	0	0
PB.5277.4	Nek2	Nek2-S-4	ISM	0	0	0	0	0	0	0	0	0	0	0	0	0	2.13636	0	0	0	0	0	0	0	0	0	0	0	0	0	0	0	0	3.01019	3.31925	0	0	0	3.47019	0	0	0	2.95272	0	0	3.6987	0	0	0
PB.40993.219	Set	Set-S-219	ISM	0	0	0	0	2.2995	0	0	0	0	0	0	0	0	0	1.64244	0	0	0	0	0	0	0	0	0	0	0	0	0	0	0	4.07539	4.67804	0	0	0	3.47019	3.11271	0	3.11123	2.95272	0	4.12752	0	3.88715	0	0
PB.49262.6	Dnttip2	Dnttip2-S-6	ISM	1.86468	2.04954	2.11911	2.16213	0	0	0	0	0	0	3.00104	0	2.04338	2.76866	0	2.91945	0	2.01354	0	0	0	0	0	0	0	0	0	0	0	0	0	0	0	0	0	0	0	0	0	0	0	0	0	0	0	0
PB.28855.45	Pmm2	Pmm2-S-45	ISM	0	0	0	0	0	0	0	0	0	0	0	0	0	0	0	0	0	0	0	0	0	0	0	0	0	0	0	0	0	0	0	0	0	0	0	0	0	0	0	0	0	0	0	0	0	0
PB.16842.59	Nemf	Nemf-S-59	ISM	0	0	2.11911	0	0	0	0	2.055	0	0	1.99726	1.80981	0	0	2.23382	2.91945	0	2.63759	0	0	0	0	0	0	0	0	0	0	0	0	0	0	0	0	0	0	0	0	0	0	0	0	0	0	0	0
PB.27279.38	Triobp	Triobp-S-38	ISM	1.86468	2.04954	0	0	2.2995	1.96174	2.09948	2.055	0	0	0	0	2.66954	2.13636	2.23382	2.27886	2.15772	0	1.92483	2.84395	0	3.43962	0	3.04884	0	0	2.80904	0	0	0	0	0	0	0	0	0	0	0	0	0	0	0	0	0	0	0
PB.38951.27	Ifit1bl2	Ifit1bl2-S-27	ISM	0	0	2.11911	0	0	0	0	0	0	0	0	1.80981	2.66954	2.13636	2.23382	3.58524	0	2.01354	1.92483	0	0	0	0	0	0	0	0	0	0	0	0	0	0	0	0	0	0	0	0	0	0	0	0	0	0	0
PB.6913.3	P4ha1	P4ha1-S-3	ISM	1.86468	2.04954	0	0	0	0	0	0	0	0	0	0	2.04338	0	1.64244	2.27886	0	0	0	0	0	0	0	0	0	0	0	0	0	0	0	0	0	0	0	0	0	0	0	0	0	0	0	0	0	0
PB.80235.39	Hcfc1	Hcfc1-S-39	ISM	0	0	0	0	0	0	0	0	0	0	0	1.80981	0	0	1.64244	0	0	0	0	0	0	0	0	0	0	0	0	0	0	0	0	0	0	0	3.13018	0	0	0	0	0	0	0	0	0	0	0
PB.43542.165	Mfap1a	Mfap1a-S-165	ISM	0	3.05837	0	0	0	0	0	0	0	0	3.00104	1.80981	3.32743	2.13636	0	1.6832	0	0	0	0	0	0	0	0	0	0	0	0	0	0	0	0	0	0	0	0	0	0	0	0	0	0	0	0	0	0
PB.71752.589	Trim61	Trim61-S-589	FSM	4.01708	4.69344	3.80538	3.85307	4.84078	3.62887	0	3.06435	0	0	4.06593	4.13214	4.55422	4.10675	4.43503	4.48476	3.45333	3.96874	2.92112	2.84395	0	0	0	0	4.30149	2.71216	0	2.87225	0	0	0	0	0	0	0	0	0	0	0	0	0	0	0	0	0	0
PB.55435.17	Fam133b	Fam133b-S-17	ISM	0	0	2.11911	0	0	0	0	0	2.19357	0	0	1.80981	0	0	0	1.6832	0	0	1.92483	0	0	0	0	0	2.74483	0	0	0	0	0	0	0	0	0	0	0	0	0	0	0	0	0	0	0	0	0
PB.39840.242	Ccdc186	Ccdc186-S-242	ISM	2.47719	0	0	0	0	0	0	0	0	0	2.62014	0	2.04338	0	1.64244	2.27886	1.57395	0	0	0	0	0	0	0	0	0	0	0	0	0	0	0	0	0	0	0	0	0	0	0	0	0	0	0	0	0
PB.24750.134	Sugt1	Sugt1-S-134	FSM	2.47719	0	0	0	0	1.96174	0	0	0	0	1.99726	1.80981	2.04338	2.13636	1.64244	1.6832	0	0	0	0	2.99065	0	0	0	2.74483	0	0	0	0	0	0	0	0	0	0	0	0	0	0	0	0	0	0	0	0	0
PB.4530.161	Nuf2	Nuf2-S-161	ISM	1.86468	0	2.11911	0	2.2995	0	0	0	0	0	0	0	2.04338	0	0	2.27886	0	0	0	0	0	0	0	0	0	0	0	0	0	0	0	0	0	0	0	0	0	0	0	0	0	0	0	0	0	0
PB.42050.16	Ssb	Ssb-S-16	ISM	0	0	2.75031	0	2.2995	0	0	0	2.19357	0	0	1.80981	3.05164	3.15298	1.64244	3.69994	0	2.63759	0	0	0	0	0	0	0	0	0	0	0	0	0	0	0	0	0	0	0	0	0	0	0	0	0	0	0	0
PB.18355.234	Hsp90aa1	Hsp90aa1-S-234	ISM	0	0	0	0	0	1.96174	0	2.055	0	0	0	1.80981	0	0	0	1.6832	0	0	1.92483	0	0	0	0	0	2.74483	0	0	0	0	0	0	0	0	0	0	0	0	0	0	0	0	0	0	0	0	0
PB.62157.15	Tax1bp1	Tax1bp1-S-15	ISM	3.51819	3.33425	3.6275	2.16213	3.82529	3.23659	2.09948	2.055	0	0	3.00104	3.73467	3.05164	3.15298	3.53637	3.98142	2.52389	3.68734	3.19524	0	0	0	0	0	0	0	0	0	0	0	0	0	0	0	0	0	0	0	0	0	0	0	0	0	0	0
PB.47496.2	Smc4	Smc4-S-2	ISM	2.47719	3.55023	0	2.16213	0	1.96174	3.11288	0	0	0	0	2.41757	2.04338	3.15298	3.08368	2.91945	0	4.08443	2.54223	2.84395	0	0	0	0	0	0	0	0	0	0	0	0	0	0	0	0	0	0	0	0	0	0	0	0	0	0
PB.56178.30	Hadha	Hadha-S-30	ISM	0	2.67612	0	0	2.2995	0	0	0	0	0	2.62014	1.80981	2.66954	2.76866	0	2.27886	0	0	0	0	0	0	0	0	0	0	0	0	0	0	0	0	0	0	0	0	0	0	0	0	0	0	0	0	0	0
PB.44983.2	Top1	Top1-S-2	ISM	3.79843	4.62952	3.41098	0	4.28708	3.77922	2.09948	3.06435	3.21493	0	4.26348	4.53224	4.48092	4.32659	4.48326	5.03953	2.52389	4.6524	4.61034	2.84395	2.99065	0	0	0	0	0	2.80904	0	0	0	0	0	0	0	3.13018	0	0	0	0	0	0	0	0	0	0	0
PB.59627.107	Sbds	Sbds-S-107	ISM	0	0	2.75031	0	2.2995	0	0	0	0	0	2.62014	0	0	0	0	1.6832	0	0	1.92483	0	0	0	0	0	2.74483	0	0	0	0	0	0	0	0	0	0	0	0	0	0	0	0	0	0	0	0	0
PB.49458.14	Lef1	Lef1-S-14	ISM	0	2.04954	2.11911	0	2.2995	0	0	0	0	0	0	2.41757	0	0	1.64244	1.6832	0	0	0	0	0	0	0	0	2.74483	0	0	0	0	0	0	0	0	0	0	0	0	0	0	0	0	0	0	0	0	0
PB.48865.52	Atp5f1	Atp5f1-S-52	ISM	0	0	2.11911	0	2.2995	0	0	2.055	0	0	1.99726	1.80981	0	2.13636	0	2.27886	1.57395	2.01354	0	2.84395	0	0	0	0	0	0	0	0	0	0	0	0	0	0	0	0	0	0	0	0	0	0	0	0	0	0
PB.22917.13	Duxbl3	Duxbl3-S-13	FSM	0	0	0	0	0	0	0	0	0	0	0	0	0	0	0	0	0	0	0	0	0	0	0	0	0	0	0	0	0	0	3.01019	0	0	0	3.13018	0	0	0	0	0	0	0	0	3.88715	0	0
PB.14747.246	H3f3b	H3f3b-S-246	ISM	1.86468	3.33425	2.11911	2.79601	0	2.58199	3.11288	2.055	0	2.81401	1.99726	2.79287	2.66954	2.76866	0	2.27886	2.52389	2.63759	0	3.50757	0	4.1166	0	3.04884	0	3.37154	2.80904	0	3.94143	0	0	0	0	0	0	0	0	0	0	0	0	0	0	0	0	0
PB.22320.54	Paip1	Paip1-S-54	ISM	2.85426	3.33425	3.41098	2.16213	2.94119	2.96193	2.72941	0	0	0	2.62014	3.60454	4.22195	2.13636	3.75367	3.89611	0	0	0	0	0	0	0	0	3.79966	0	0	0	0	0	0	0	0	0	0	0	0	0	0	0	0	0	0	0	0	0
PB.12197.8	Itgae	Itgae-S-8	ISM	0	0	0	0	0	0	0	0	0	0	0	0	0	0	0	0	0	0	0	0	0	0	0	0	0	0	0	0	0	0	0	3.31925	3.10739	0	3.80123	0	0	2.96822	0	0	3.88458	0	0	0	0	0
PB.68867.86	Copb1	Copb1-S-86	ISM	1.86468	0	0	0	2.2995	1.96174	0	0	0	0	0	2.41757	2.04338	2.76866	0	2.6496	0	2.01354	0	0	0	0	0	0	0	0	0	0	0	0	0	0	0	0	0	0	0	0	0	0	0	0	0	0	0	0
PB.60453.30	Zfp655	Zfp655-S-30	FSM	1.86468	0	0	0	0	0	0	0	0	0	1.99726	0	0	0	2.23382	2.6496	0	0	2.54223	2.84395	2.99065	0	0	0	0	0	3.4716	0	0	0	0	0	0	0	0	0	0	0	0	2.95272	0	0	0	0	0	0
PB.44983.4	Top1	Top1-S-4	ISM	3.91372	4.69344	3.41098	3.67498	4.00396	3.62887	3.60575	2.68196	0	2.1791	4.42837	4.47572	5.20592	5.01311	4.6558	5.06752	3.00213	4.87363	4.4865	0	0	0	0	0	0	0	3.4716	0	0	0	0	0	0	0	0	0	0	0	0	0	0	0	0	0	0	0
PB.65951.26	Rps19	Rps19-S-26	NIC	0	0	0	0	0	0	0	0	0	0	0	0	0	0	0	0	0	0	0	0	0	0	0	0	0	0	0	0	0	0	0	0	0	0	0	0	0	0	0	0	0	0	0	0	0	0
PB.39642.98	Sfr1	Sfr1-S-98	NNC	0	0	3.13424	2.16213	0	0	0	0	0	0	0	0	2.04338	0	2.23382	0	0	2.01354	0	0	0	0	0	0	0	0	0	0	0	0	0	0	0	0	0	0	0	0	0	0	0	0	0	0	0	0
PB.5124.102	Tgfb2	Tgfb2-S-102	ISM	0	2.04954	0	0	0	0	0	0	0	0	0	0	2.04338	0	2.23382	0	0	0	0	3.50757	2.99065	0	2.97402	0	0	2.71216	0	0	0	0	0	0	0	0	0	0	0	0	0	0	0	0	0	0	0	0
PB.24989.17	Lmo7	Lmo7-S-17	NNC	0	2.04954	0	0	0	0	0	0	0	0	1.99726	1.80981	2.04338	0	1.64244	2.91945	0	0	0	0	0	0	0	0	0	0	0	0	0	0	0	0	0	0	0	0	0	0	0	0	0	0	0	0	0	0
PB.4798.126	Adss	Adss-S-126	ISM	0	0	0	0	0	0	0	2.055	0	0	1.99726	0	0	3.15298	0	1.6832	0	3.01892	0	0	0	0	0	0	0	0	0	0	0	0	0	0	0	0	0	0	0	0	0	0	0	0	0	0	0	0
PB.68661.20	Ppfibp2	Ppfibp2-S-20	NNC	4.27528	4.00941	3.41098	0	3.60758	2.58199	2.09948	2.055	0	2.1791	3.27621	3.60454	3.87154	4.10675	3.25834	4.48476	2.15772	2.01354	2.54223	0	2.99065	0	0	0	0	0	0	0	0	0	0	0	0	0	0	0	0	0	0	0	0	0	0	0	0	0
PB.18261.11	Wars	Wars-S-11	ISM	0	0	0	0	0	1.96174	2.72941	0	0	0	0	0	0	0	0	0	2.15772	0	1.92483	0	0	0	0	0	0	0	0	0	0	0	0	0	0	0	3.13018	0	0	0	0	0	0	0	0	0	0	0
PB.2712.116	Hdlbp	Hdlbp-S-116	ISM	0	0	0	2.79601	2.2995	0	0	0	0	2.1791	0	1.80981	0	0	1.64244	1.6832	0	0	0	0	0	0	0	0	0	0	0	0	0	0	0	0	0	0	0	0	0	0	0	0	0	0	0	0	0	0
PB.2732.96	Atg4b	Atg4b-S-96	ISM	0	0	0	0	0	0	0	0	0	0	0	0	0	0	0	0	0	0	0	0	0	0	0	0	0	0	0	0	0	0	0	0	0	0	3.13018	0	0	0	0	0	0	0	0	0	0	5.554
PB.56301.10	Slc4a1ap	Slc4a1ap-S-10	ISM	0	0	0	0	0	1.96174	0	0	0	0	2.62014	1.80981	3.05164	2.76866	1.64244	2.27886	1.57395	3.01892	0	0	0	0	0	0	0	0	0	0	0	0	0	0	0	0	0	0	0	0	0	0	0	0	0	0	0	0
PB.35619.8	2700062C07Rik	2700062C07Rik-S-8	FSM	0	2.04954	2.11911	0	0	0	0	0	0	0	0	0	2.04338	0	0	0	1.57395	0	0	0	0	0	0	0	0	0	0	0	0	0	0	0	0	0	3.13018	0	0	0	0	0	0	0	0	0	0	0
PB.78709.821	mt-Nd5	mt-Nd5-S-821	FSM	1.86468	2.04954	2.11911	0	2.2995	2.58199	0	0	0	0	3.49177	2.41757	2.66954	0	0	2.6496	2.15772	2.63759	1.92483	2.84395	0	3.43962	3.64129	3.71799	0	2.71216	0	0	0	4.4043	3.01019	3.31925	0	3.24901	4.48314	4.14766	4.86669	4.53568	0	2.95272	3.88458	4.12752	0	0	0	0
PB.70030.173	Nap1l4	Nap1l4-S-173	ISM	2.47719	0	2.11911	0	0	0	0	0	0	0	2.62014	0	2.04338	2.76866	2.87192	0	0	0	0	0	0	0	0	0	0	0	0	0	0	0	0	0	0	0	0	0	0	0	0	0	0	0	0	0	0	0
PB.54823.31	Rex2	Rex2-S-31	FSM	1.86468	0	0	0	2.2995	0	0	0	0	0	0	0	0	0	0	1.6832	0	0	0	0	0	0	0	3.04884	0	0	0	0	0	0	0	0	0	0	0	0	0	0	0	0	0	0	0	0	0	0
PB.54165.97	Srrm1	Srrm1-S-97	ISM	1.86468	2.67612	0	0	2.2995	0	0	0	0	0	0	2.79287	0	2.13636	1.64244	3.30676	0	0	0	0	0	0	0	0	0	0	0	0	0	0	0	0	0	0	0	0	0	0	0	0	0	0	0	0	0	0
PB.63789.115	H1foo	H1foo-S-115	ISM	2.85426	0	2.11911	0	2.2995	2.58199	0	0	0	0	1.99726	1.80981	3.32743	0	2.23382	1.6832	0	0	0	2.84395	0	0	0	0	0	0	0	0	0	0	0	0	0	0	0	0	0	0	0	0	0	0	0	0	0	0
PB.14423.7	Psmd12	Psmd12-S-7	ISM	1.86468	2.04954	2.11911	2.16213	0	2.96193	0	0	0	0	1.99726	2.79287	3.54337	2.13636	1.64244	3.69994	1.57395	2.63759	0	0	0	0	0	0	0	0	0	0	0	0	0	0	0	0	0	0	0	0	0	0	0	0	0	0	0	0
PB.7044.84	Sar1a	Sar1a-S-84	FSM	0	0	0	0	2.2995	0	0	2.055	0	0	0	0	0	0	0	0	0	0	0	2.84395	0	3.43962	2.97402	0	0	0	0	0	0	0	0	0	0	0	0	0	3.11271	0	0	0	0	0	0	0	0	0
PB.42568.189	Slc43a3	Slc43a3-S-189	ISM	2.47719	2.04954	2.11911	2.16213	0	0	2.72941	0	2.82934	0	1.99726	3.06512	3.05164	2.13636	2.23382	1.6832	2.15772	2.01354	2.92112	2.84395	0	0	2.97402	0	0	2.71216	0	0	0	4.4043	0	0	0	0	0	0	0	0	0	0	0	0	0	3.88715	0	0
PB.19923.5	Sirt5	Sirt5-S-5	NNC	1.86468	0	0	0	0	1.96174	0	2.055	0	0	1.99726	0	0	0	1.64244	0	2.52389	0	1.92483	0	0	0	0	0	0	0	0	0	0	0	0	0	0	0	0	0	0	0	0	0	0	0	0	0	0	0
PB.40218.1	Kin	Kin-S-1	FSM	0	0	2.75031	0	0	1.96174	0	2.055	0	0	1.99726	1.80981	3.32743	2.76866	2.87192	2.6496	2.15772	2.63759	1.92483	0	0	0	0	0	0	0	0	0	0	0	0	0	0	0	0	0	0	0	0	0	0	0	0	0	0	0
PB.21241.27	Slf1	Slf1-S-27	ISM	0	2.67612	0	0	0	1.96174	0	0	0	0	0	1.80981	2.04338	0	1.64244	2.6496	0	2.63759	0	0	0	0	0	0	3.40532	0	0	0	0	0	0	0	0	0	0	0	0	0	0	0	0	0	0	0	0	0
PB.17596.49	Tmed10	Tmed10-S-49	ISM	0	0	2.11911	2.16213	0	0	2.09948	0	0	0	0	2.41757	0	2.13636	0	1.6832	0	0	0	0	0	0	0	0	0	0	0	0	0	0	0	0	0	0	0	0	0	0	0	0	0	0	0	0	0	0
PB.17961.27	Calm1	Calm1-S-27	ISM	1.86468	0	2.75031	2.16213	0	2.58199	0	0	0	0	1.99726	2.79287	3.05164	2.76866	2.87192	2.6496	0	0	0	0	2.99065	0	0	0	0	0	0	2.87225	0	0	0	0	0	3.24901	0	0	0	0	0	0	0	0	0	0	0	0
PB.2343.129	Sp110	Sp110-S-129	NNC	0	0	0	0	0	0	0	0	0	0	0	2.41757	0	0	2.23382	0	0	0	0	0	2.99065	0	0	3.04884	0	0	3.4716	0	0	0	0	0	0	0	0	0	0	0	0	0	0	0	0	0	0	0
PB.5516.8	Ppil4	Ppil4-S-8	ISM	1.86468	2.04954	0	0	0	2.58199	0	0	0	0	3.27621	1.80981	2.66954	2.13636	0	2.27886	0	0	0	0	0	0	0	0	2.74483	0	0	0	0	0	0	0	0	0	0	0	0	0	0	0	0	0	0	0	0	0
PB.78037.2	Ip6k2	Ip6k2-S-2	FSM	0	0	0	0	0	0	0	0	0	0	0	0	0	2.13636	2.60293	0	0	0	0	0	0	0	0	0	0	2.71216	0	2.87225	0	0	0	0	0	0	0	3.47019	3.11271	2.96822	0	0	0	0	0	0	0	0
PB.29532.15	Igf2bp2	Igf2bp2-S-15	ISM	0	0	0	0	0	0	0	0	0	0	0	0	0	0	0	0	1.57395	0	1.92483	0	2.99065	0	0	0	0	0	0	0	0	0	0	0	0	0	0	0	0	0	0	0	0	0	0	0	0	0
PB.44781.1	Phf20	Phf20-S-1	ISM	2.47719	0	2.11911	0	2.2995	0	0	0	0	0	3.00104	1.80981	2.04338	0	2.23382	0	0	2.01354	1.92483	0	0	0	0	0	0	0	0	0	0	0	0	0	0	0	0	0	0	0	0	0	0	0	0	0	0	0
PB.76244.485	Glce	Glce-S-485	NNC	0	0	0	0	0	0	0	2.055	0	0	0	0	2.04338	0	1.64244	1.6832	0	0	0	0	2.99065	0	0	0	0	4.04737	0	2.87225	0	0	0	0	0	0	0	0	0	0	0	0	0	0	0	0	0	0
PB.46265.6	Ralyl	Ralyl-S-6	NNC	0	0	2.11911	0	0	0	0	0	0	0	0	0	2.66954	0	0	0	0	0	0	2.84395	2.99065	3.43962	0	3.71799	0	0	0	2.87225	0	0	0	0	0	0	0	0	0	0	0	0	0	0	0	0	0	0
PB.29430.70	Abcf3	Abcf3-S-70	ISM	0	0	0	0	0	0	0	0	0	0	0	0	0	0	0	0	1.57395	0	0	0	0	0	0	3.04884	0	0	2.80904	0	0	0	0	0	0	0	3.13018	0	0	0	0	0	0	0	0	0	0	0
PB.41077.40	Tor1a	Tor1a-S-40	NNC	0	0	0	0	0	0	2.72941	0	0	0	1.99726	0	2.04338	0	0	1.6832	0	0	0	0	0	0	0	0	0	2.71216	0	0	0	0	0	0	0	0	0	0	0	0	0	0	0	0	0	0	0	0
PB.23556.39	Ktn1	Ktn1-S-39	ISM	0	3.72776	0	0	0	1.96174	0	0	2.19357	0	3.27621	2.41757	3.87154	0	1.64244	3.69994	1.57395	3.29432	2.54223	0	0	0	2.97402	0	0	0	0	0	0	0	0	0	0	0	0	0	0	0	0	0	0	0	0	0	0	0
PB.72320.30	Usp38	Usp38-S-30	ISM	0	0	0	0	0	1.96174	0	0	0	0	0	0	0	2.13636	0	0	1.57395	0	0	0	0	3.43962	2.97402	0	0	2.71216	2.80904	0	0	0	0	0	0	0	0	0	0	0	0	0	0	0	0	0	0	0
PB.35143.24	Epc1	Epc1-S-24	ISM	0	2.04954	2.11911	0	2.2995	0	0	0	0	0	2.62014	1.80981	2.66954	2.13636	1.64244	2.27886	0	0	0	0	0	0	0	0	2.74483	0	0	0	0	0	0	0	0	0	0	0	0	0	0	0	0	0	0	0	0	0
PB.71936.13	Isyna1	Isyna1-S-13	ISM	0	0	0	0	0	0	0	0	0	0	0	0	0	0	0	0	0	0	0	0	0	0	0	0	0	0	0	0	0	0	0	0	0	0	0	0	0	0	0	0	0	0	0	0	0	0
PB.67310.76	Nipa2	Nipa2-S-76	ISM	0	2.04954	0	0	0	0	0	0	0	0	0	0	0	0	0	1.6832	0	0	0	0	0	0	0	0	0	0	2.80904	0	0	0	3.01019	0	0	3.92256	0	0	0	0	0	0	0	0	0	0	0	0
PB.40993.220	Set	Set-S-220	ISM	0	0	0	0	0	0	0	0	0	0	0	0	0	0	0	0	0	0	0	0	0	0	0	0	0	0	0	0	0	0	0	3.31925	0	3.24901	0	0	0	0	3.11123	3.61942	0	0	3.6987	0	0	0
PB.41410.6	Rabgap1	Rabgap1-S-6	ISM	0	3.33425	2.11911	0	2.2995	1.96174	0	0	0	0	2.62014	0	0	0	2.23382	2.91945	0	2.01354	0	0	0	0	0	0	0	0	0	0	0	0	0	0	0	0	0	0	0	0	0	0	0	0	0	0	0	0
PB.5183.134	Cenpf	Cenpf-S-134	ISM	2.85426	4.12518	3.6275	2.79601	4.40333	3.77922	2.72941	2.055	2.82934	0	3.27621	3.60454	3.05164	3.42993	2.23382	4.38065	3.00213	4.36789	3.73715	0	0	0	0	0	2.74483	0	0	0	0	0	0	0	0	0	0	0	0	0	0	0	0	0	0	0	0	0
PB.16966.1	Daam1	Daam1-S-1	ISM	0	2.67612	2.11911	0	0	0	0	0	0	0	1.99726	0	3.05164	0	1.64244	2.91945	0	0	0	0	0	0	0	0	0	0	0	0	0	0	0	0	0	0	0	0	0	0	0	0	0	0	0	0	0	0
PB.36749.8	Csnk1a1	Csnk1a1-S-8	ISM	1.86468	0	0	0	0	1.96174	0	0	0	0	0	1.80981	0	2.13636	1.64244	0	0	0	0	0	0	0	0	0	0	0	0	0	0	0	0	0	0	0	0	0	0	0	0	0	0	0	0	0	0	0
PB.46688.2	Fxr1	Fxr1-S-2	ISM	2.85426	4.12518	3.13424	0	3.3289	2.58199	2.09948	0	0	0	3.00104	3.27889	4.11822	4.2227	1.64244	3.98142	1.57395	4.1881	2.54223	0	0	0	0	0	0	0	0	0	0	0	0	0	0	0	0	0	0	0	0	0	0	0	0	0	0	0
PB.55135.69	Dnajc11	Dnajc11-S-69	NIC	0	0	2.11911	0	2.2995	0	0	0	2.19357	0	0	1.80981	3.32743	2.13636	0	1.6832	0	0	0	0	0	0	0	0	0	0	0	0	0	0	0	0	0	0	0	0	0	0	0	0	0	0	0	0	0	0
PB.40267.73	Rbm17	Rbm17-S-73	FSM	0	0	0	0	0	0	2.09948	0	0	0	0	1.80981	2.04338	0	0	0	0	2.01354	0	0	0	0	0	0	0	0	0	0	4.62482	0	0	0	0	0	0	0	0	0	0	0	0	0	0	0	0	0
PB.44295.181	Crnkl1	Crnkl1-S-181	ISM	0	0	0	0	0	0	0	0	0	0	2.62014	1.80981	2.66954	0	1.64244	0	0	0	0	0	0	0	0	0	2.74483	0	0	0	0	0	0	0	0	0	0	0	0	0	0	0	0	0	0	0	0	0
PB.57353.90	Usp46	Usp46-S-90	NNC	3.12744	3.05837	4.08749	3.45816	4.15551	3.23659	2.09948	3.06435	2.82934	0	4.16958	5.19198	4.11822	5.19432	3.65091	4.74452	2.79133	3.51002	0	0	0	0	2.97402	0	2.74483	0	0	2.87225	0	0	0	0	0	0	0	0	0	0	0	0	0	0	0	0	0	0
PB.71683.23	Hpf1	Hpf1-S-23	ISM	1.86468	3.55023	3.13424	2.16213	2.94119	1.96174	0	0	0	0	3.66901	1.80981	2.66954	3.15298	1.64244	3.13174	0	2.63759	0	0	0	0	0	0	2.74483	0	0	0	0	0	0	0	0	0	0	0	0	0	0	0	0	0	0	0	0	0
PB.59472.8	Tmem132c	Tmem132c-S-8	FSM	1.86468	0	2.75031	0	0	0	0	0	3.21493	2.1791	1.99726	2.41757	0	0	1.64244	0	0	0	0	0	0	0	0	0	0	0	0	0	0	0	0	0	0	0	0	0	0	0	0	0	0	0	0	0	0	0
PB.35725.16	Wdr33	Wdr33-S-16	FSM	0	2.04954	0	0	0	0	0	0	0	2.1791	0	0	0	0	0	0	0	0	0	0	0	0	0	0	0	0	0	2.87225	0	0	0	3.99414	0	0	0	3.47019	0	0	0	0	0	0	0	0	0	0
PB.36.195	Tcea1	Tcea1-S-195	ISM	0	0	2.11911	0	0	0	2.09948	0	0	0	0	1.80981	2.04338	0	0	0	0	2.01354	0	0	0	0	0	0	0	2.71216	0	0	0	0	0	0	0	0	0	0	0	2.96822	0	0	0	0	0	0	0	0
PB.28982.291	Rsl1d1	Rsl1d1-S-291	ISM	4.11075	5.13643	4.70823	3.85307	4.28708	3.23659	3.11288	2.055	3.49252	0	4.69382	4.58574	5.91462	4.5859	4.57325	5.64012	2.79133	4.36789	3.19524	0	0	0	0	3.04884	4.08173	0	0	0	0	0	0	0	0	0	0	0	0	0	0	0	0	0	0	0	0	0
PB.26109.14	Laptm4b	Laptm4b-S-14	ISM	0	0	0	0	0	0	0	0	0	0	0	1.80981	2.66954	0	2.23382	0	0	0	0	0	0	0	2.97402	0	0	0	0	2.87225	0	0	0	0	0	0	0	0	0	0	0	0	0	0	0	0	0	0
PB.14302.215	Ccdc47	Ccdc47-S-215	ISM	1.86468	0	0	0	0	0	0	0	0	0	1.99726	0	0	0	0	2.27886	1.57395	0	0	0	0	0	0	0	0	0	0	0	0	0	0	0	0	0	0	0	0	0	0	0	0	0	0	0	0	0
PB.7119.94	Ccar1	Ccar1-S-94	FSM	0	2.04954	2.11911	0	0	0	0	0	0	0	0	0	2.04338	2.13636	0	1.6832	0	0	0	3.50757	0	0	0	0	0	0	0	0	0	0	0	0	0	0	0	0	0	0	0	0	0	0	0	0	0	0
PB.68649.5	Nlrp14	Nlrp14-S-5	ISM	0	0	0	0	0	0	0	0	0	0	1.99726	1.80981	2.04338	2.13636	1.64244	0	1.57395	0	0	0	0	0	0	0	0	0	0	0	0	0	0	0	0	0	0	0	0	0	0	0	0	0	0	0	0	0
PB.58772.3	Cox6a1	Cox6a1-S-3	NIC	0	0	0	0	0	0	0	0	0	0	0	0	0	0	0	0	0	0	0	0	0	0	0	0	0	0	0	0	0	4.4043	3.67839	0	3.77792	3.24901	3.80123	0	3.11271	4.31521	3.78185	0	0	4.81257	4.3794	4.56999	0	0
PB.48305.168	Psmd4	Psmd4-S-168	FSM	1.86468	2.04954	3.13424	0	2.2995	0	0	2.055	0	2.1791	0	2.41757	3.87154	2.76866	0	2.6496	1.57395	0	1.92483	0	0	0	0	0	0	0	0	0	0	0	0	0	0	0	0	0	0	0	0	0	0	0	0	0	0	0
PB.50051.98	Srsf11	Srsf11-S-98	ISM	1.86468	2.04954	0	0	0	0	0	0	0	0	2.62014	1.80981	2.66954	0	0	2.27886	1.57395	2.01354	0	0	2.99065	0	0	0	0	0	0	0	0	0	0	0	0	0	0	0	0	0	0	0	0	0	0	0	0	0
PB.42393.102	Sestd1	Sestd1-S-102	ISM	0	0	0	0	0	0	0	0	0	0	1.99726	0	2.66954	2.13636	0	1.6832	0	2.01354	0	0	0	0	0	0	0	2.71216	0	0	0	0	0	0	0	0	0	0	0	0	0	0	0	0	0	0	0	0
PB.47763.122	Arfip1	Arfip1-S-122	ISM	2.47719	2.04954	2.75031	0	3.60758	2.96193	2.09948	2.055	2.19357	0	0	2.79287	3.32743	2.76866	3.25834	3.80283	1.57395	2.63759	1.92483	0	0	0	0	0	0	0	0	0	0	0	0	0	0	0	0	0	0	0	0	0	0	0	0	0	0	0
PB.9636.8	Eif4enif1	Eif4enif1-S-8	ISM	0	0	0	0	0	0	0	0	0	0	0	1.80981	2.04338	2.13636	0	2.27886	1.57395	0	1.92483	0	0	0	0	0	0	0	0	0	0	0	0	0	0	0	3.13018	3.47019	0	0	0	0	0	0	0	0	0	0
PB.58431.42	Gm15446	Gm15446-S-42	FSM	0	0	0	0	0	0	0	0	0	0	0	0	0	2.13636	0	2.27886	0	0	0	0	0	0	0	0	0	0	0	0	0	0	0	0	0	0	0	0	0	0	0	0	0	0	0	0	0	0
PB.69675.3	Edrf1	Edrf1-S-3	ISM	1.86468	2.04954	0	0	2.2995	1.96174	0	0	0	0	0	2.79287	0	2.13636	1.64244	1.6832	0	0	0	0	0	0	0	0	0	0	0	0	0	0	0	0	0	0	0	0	0	0	0	0	0	0	0	0	0	0
PB.34569.161	Strn	Strn-S-161	ISM	0	2.04954	2.11911	0	2.94119	0	0	0	0	0	0	0	0	0	0	1.6832	0	0	0	0	0	0	0	0	2.74483	0	0	0	0	0	0	0	0	0	0	0	0	0	0	0	0	0	0	0	0	0
PB.22967.120	Appl1	Appl1-S-120	NNC	0	2.04954	0	0	0	1.96174	0	0	0	0	0	2.41757	2.04338	0	0	2.27886	0	0	0	0	0	0	0	0	0	0	0	0	0	0	0	0	0	0	0	0	0	0	0	0	0	0	0	0	0	0
PB.40078.38	Optn	Optn-S-38	ISM	0	2.04954	0	0	0	0	0	0	0	0	1.99726	0	2.04338	2.76866	1.64244	1.6832	0	0	0	0	0	0	0	0	0	0	0	0	0	0	0	0	0	0	0	0	0	0	0	0	0	0	0	0	0	0
PB.39147.5	Hells	Hells-S-5	ISM	0	0	0	0	0	0	0	0	0	0	0	0	0	0	0	1.6832	1.57395	0	0	0	0	0	0	0	2.74483	0	0	0	0	0	0	0	0	0	3.13018	0	0	0	0	0	0	0	0	3.88715	0	0
PB.35143.22	Epc1	Epc1-S-22	ISM	1.86468	2.04954	2.11911	0	0	0	0	0	0	0	2.62014	0	2.04338	0	0	2.91945	0	0	0	0	0	0	0	0	0	0	0	0	0	0	0	0	0	0	0	0	0	0	0	0	0	0	0	0	0	0
PB.49933.503	Nexn	Nexn-S-503	NIC	2.47719	3.05837	2.11911	2.16213	0	0	2.09948	0	0	0	2.62014	0	3.32743	3.15298	2.87192	3.13174	2.15772	3.01892	2.54223	0	0	0	0	0	0	0	0	0	0	0	0	0	0	0	0	0	0	0	0	0	0	0	0	0	0	0
PB.27422.26	Atf4	Atf4-S-26	FSM	0	0	0	0	0	0	0	0	0	0	0	0	0	0	1.64244	0	0	0	0	2.84395	0	0	0	0	2.74483	3.37154	0	0	0	0	0	0	0	0	0	0	0	0	0	0	0	0	0	0	5.28679	0
PB.36202.1	Rbm27	Rbm27-S-1	ISM	3.12744	3.33425	4.08749	3.18091	4.40333	3.62887	0	2.055	0	3.47672	4.56988	3.95302	4.22195	4.79163	2.23382	4.57904	3.17614	3.68734	0	3.50757	0	0	0	0	3.40532	0	2.80904	4.43537	0	0	0	0	0	0	0	0	0	0	0	0	0	0	0	0	0	0
PB.82052.121	Txlng	Txlng-S-121	ISM	1.86468	2.04954	0	2.16213	0	0	0	0	0	0	1.99726	2.41757	0	2.76866	0	2.27886	0	0	0	0	0	0	0	0	0	0	0	0	0	0	0	0	0	0	0	0	0	0	0	0	0	0	0	0	0	0
PB.24627.85	Gtf2f2	Gtf2f2-S-85	ISM	0	0	2.75031	2.16213	0	0	0	0	0	0	1.99726	3.27889	3.05164	3.15298	2.23382	2.91945	1.57395	2.01354	0	0	0	0	0	0	2.74483	0	0	0	0	0	0	0	0	0	0	0	0	0	0	0	0	0	0	0	0	0
PB.66146.2	Zfp60	Zfp60-S-2	FSM	1.86468	0	0	0	0	1.96174	0	0	0	0	0	0	2.04338	0	2.23382	1.6832	0	2.01354	1.92483	0	0	0	2.97402	0	0	0	0	0	0	0	0	0	0	0	0	0	0	0	0	0	0	0	0	0	0	0
PB.37790.2	D330050I16Rik	D330050I16Rik-S-2	FSM	0	0	0	2.16213	0	0	0	2.055	2.82934	2.81401	0	0	0	0	0	0	0	0	0	0	2.99065	0	0	0	0	0	0	0	0	0	0	0	3.77792	0	0	0	3.11271	0	0	0	0	0	0	0	0	0
PB.75373.58	Hspa8	Hspa8-S-58	ISM	1.86468	0	0	0	0	0	0	0	0	0	0	0	0	0	1.64244	2.27886	0	0	0	0	0	0	0	0	0	0	0	0	0	0	0	0	0	0	0	0	0	0	0	2.95272	0	0	0	0	0	0
PB.13872.80	Dnajc7	Dnajc7-S-80	ISM	0	2.04954	0	0	0	0	0	0	0	0	0	1.80981	2.66954	0	1.64244	3.13174	0	0	0	0	0	0	0	0	0	0	0	0	0	0	0	0	0	0	0	0	0	0	0	0	0	0	0	0	0	0
PB.53494.6	Clspn	Clspn-S-6	FSM	0	2.04954	0	0	0	1.96174	0	0	0	0	1.99726	0	0	2.13636	1.64244	1.6832	0	2.01354	0	0	0	0	0	0	0	0	0	0	0	0	0	0	0	0	0	0	0	0	0	0	0	0	0	0	0	0
PB.23732.15	Tox4	Tox4-S-15	ISM	0	2.04954	2.11911	0	0	0	0	0	0	0	0	0	2.04338	0	0	1.6832	0	0	0	0	0	0	0	0	2.74483	0	0	0	0	4.4043	0	0	3.10739	0	0	0	0	0	0	0	0	0	0	0	0	0
PB.3376.27	Slc45a3	Slc45a3-S-27	ISM	0	0	0	0	0	0	0	0	0	0	0	0	0	0	0	0	0	0	1.92483	3.50757	2.99065	0	0	0	0	3.37154	2.80904	3.5367	0	0	0	0	0	0	0	0	0	0	0	0	0	0	0	0	0	0
PB.11251.4	Rapgef6	Rapgef6-S-4	ISM	1.86468	2.04954	0	2.16213	0	0	0	0	0	0	0	1.80981	0	0	0	2.27886	0	0	0	0	0	0	0	0	0	0	0	0	0	0	0	0	0	0	0	0	0	0	0	0	0	0	0	0	0	0
PB.20278.133	Auh	Auh-S-133	NNC	0	0	2.75031	0	2.2995	0	0	0	2.19357	0	0	0	0	0	0	1.6832	0	2.63759	0	0	0	0	0	0	0	2.71216	2.80904	0	0	0	0	0	0	0	0	0	0	0	0	0	0	0	0	0	0	0
PB.35826.2	Pkd2l2	Pkd2l2-S-2	FSM	5.13621	5.13643	5.04213	3.45816	5.24361	4.46089	3.38938	4.01557	3.88779	4.15429	5.07655	5.69487	6.03412	6.10728	5.83702	6.20709	3.17614	4.76912	4.66694	2.84395	4.05518	0	2.97402	0	4.98784	0	2.80904	2.87225	0	0	0	0	0	0	0	0	0	0	0	0	0	0	0	0	0	0
PB.13040.103	Rps6kb1	Rps6kb1-S-103	ISM	0	2.04954	0	0	0	0	0	0	0	0	0	1.80981	2.04338	0	0	1.6832	0	0	0	0	0	0	0	0	2.74483	0	0	0	0	0	0	0	0	0	0	0	0	0	0	0	0	0	0	0	0	0
PB.79818.270	Mospd1	Mospd1-S-270	ISM	0	0	0	0	0	0	2.09948	0	0	0	0	1.80981	0	0	1.64244	1.6832	0	0	1.92483	0	0	0	0	0	0	0	0	0	0	0	0	0	0	0	0	0	0	0	0	0	0	0	0	0	0	0
PB.72740.116	Aktip	Aktip-S-116	NNC	3.12744	3.33425	2.75031	2.79601	2.94119	3.62887	2.72941	2.055	3.21493	2.1791	3.49177	2.79287	0	2.76866	3.08368	3.69994	2.15772	3.01892	2.54223	2.84395	2.99065	0	0	0	0	0	3.4716	2.87225	0	0	0	0	0	0	0	0	0	0	0	0	0	0	0	0	0	0
PB.36022.17	Ik	Ik-S-17	ISM	0	2.04954	0	0	0	0	0	0	0	0	0	0	2.04338	0	1.64244	2.27886	1.57395	0	0	0	0	0	0	0	0	0	0	0	0	0	0	0	0	0	0	0	0	0	0	0	0	0	0	0	0	0
PB.63068.309	D6Ertd527e	D6Ertd527e-S-309	FSM	0	0	0	0	0	0	0	0	0	0	0	2.41757	3.05164	0	0	1.6832	0	0	1.92483	0	0	0	0	0	0	0	0	2.87225	0	0	0	0	0	0	0	0	0	0	0	0	0	0	0	0	0	0
PB.59902.50	Prkrip1	Prkrip1-S-50	ISM	0	0	0	0	2.2995	0	0	0	0	0	0	1.80981	2.04338	0	1.64244	1.6832	0	2.01354	0	0	0	0	0	0	0	0	0	0	0	0	0	0	0	0	0	0	0	0	0	0	0	0	0	0	0	0
PB.41137.28	Nup214	Nup214-S-28	NNC	0	0	0	0	0	1.96174	0	0	0	0	0	0	2.04338	2.13636	1.64244	0	2.15772	0	1.92483	0	0	0	0	0	0	0	0	0	3.94143	0	0	0	0	0	0	0	0	0	0	0	0	0	0	0	0	0
PB.78078.240	Fbxw20	Fbxw20-S-240	ISM	0	0	0	0	0	0	0	0	0	0	1.99726	0	0	0	1.64244	0	0	2.01354	0	0	2.99065	0	0	0	0	2.71216	0	0	0	0	0	0	0	0	0	0	0	0	0	0	0	0	0	0	0	0
PB.80609.2	Gm14798	Gm14798-S-2	NNC	0	0	0	0	0	0	0	0	0	0	0	0	0	2.13636	0	0	0	0	0	0	0	0	0	0	0	0	0	0	0	4.4043	0	3.99414	3.10739	0	4.88483	0	0	2.96822	0	2.95272	0	4.12752	3.6987	0	0	0
PB.53376.100	Cdca8	Cdca8-S-100	FSM	4.01708	5.28404	4.48734	4.25144	4.84078	3.62887	3.38938	0	2.82934	2.1791	4.16958	4.77502	5.04653	4.65928	4.08343	5.06752	2.79133	3.51002	3.19524	0	0	0	0	0	4.08173	0	2.80904	0	0	0	0	3.31925	3.10739	0	0	0	0	0	0	0	0	0	0	0	0	0
PB.42036.11	Ppig	Ppig-S-11	ISM	1.86468	2.04954	0	0	0	3.23659	0	2.055	2.82934	0	1.99726	0	3.32743	2.76866	3.08368	1.6832	1.57395	0	0	0	0	0	0	0	0	0	0	0	0	0	0	0	0	0	0	0	0	0	0	0	0	0	0	0	0	0
PB.33237.26	Abcf1	Abcf1-S-26	ISM	0	0	0	0	0	0	0	0	0	0	0	0	0	0	0	0	0	0	1.92483	0	0	0	0	0	2.74483	0	0	0	0	0	0	0	0	0	0	0	0	2.96822	0	0	0	4.12752	4.3794	0	0	0
PB.2391.341	Ncl	Ncl-S-341	ISM	0	2.04954	0	0	0	1.96174	0	0	2.19357	0	2.62014	2.41757	2.04338	2.13636	2.87192	3.13174	0	0	0	0	0	0	0	0	0	0	0	0	0	0	0	0	0	0	0	0	0	0	0	0	0	0	0	0	0	0
PB.18137.42	Tcl1b2	Tcl1b2-S-42	NNC	0	0	0	2.79601	0	0	0	0	2.19357	2.1791	0	0	0	2.13636	0	0	0	2.01354	1.92483	0	0	0	0	0	0	2.71216	3.4716	0	0	0	0	0	0	0	0	0	0	0	0	0	0	0	0	0	0	0
PB.16157.24	Ankmy2	Ankmy2-S-24	ISM	0	0	0	0	0	0	0	0	0	0	0	0	0	0	0	0	0	0	0	0	0	0	0	0	0	0	0	0	0	0	0	0	0	0	0	0	0	0	0	0	0	4.12752	0	0	0	0
PB.52981.22	Rps8	Rps8-S-22	NNC	0	0	0	2.16213	0	0	0	0	0	0	0	0	0	0	0	0	0	0	0	0	0	0	0	0	0	0	0	0	0	0	3.01019	0	0	0	0	0	0	0	3.11123	2.95272	3.88458	0	0	0	0	0
PB.17446.69	Rbm25	Rbm25-S-69	NIC	0	3.05837	0	0	2.2995	1.96174	2.09948	2.055	0	0	3.27621	2.79287	2.66954	0	2.87192	2.91945	0	0	2.92112	0	0	0	0	0	0	0	0	0	0	0	0	0	0	0	0	0	0	0	0	0	0	0	0	0	0	0
PB.20223.1	Gm32834	Gm32834-S-1	FSM	3.12744	2.67612	2.75031	2.16213	2.2995	2.96193	3.11288	0	2.82934	3.19929	3.27621	3.73467	3.05164	3.15298	4.08343	3.30676	2.52389	2.01354	3.58696	0	0	0	0	4.11533	4.30149	2.71216	4.14909	3.5367	0	0	0	0	0	0	0	0	0	0	0	0	0	0	0	0	0	0
PB.28208.2	Slc48a1	Slc48a1-S-2	FSM	0	0	0	0	0	0	0	0	2.19357	0	3.00104	0	2.04338	0	0	1.6832	0	0	0	2.84395	0	0	0	0	0	0	0	0	0	0	0	0	0	0	0	0	0	0	0	0	0	0	0	0	0	0
PB.66182.8	Zfp780b	Zfp780b-S-8	NIC	0	0	0	0	0	0	0	0	0	0	0	0	0	0	0	0	0	0	0	0	0	0	0	0	0	0	0	0	0	0	3.67839	0	0	0	0	0	0	0	0	2.95272	0	0	0	0	0	0
PB.60616.24	Mtus2	Mtus2-S-24	ISM	0	0	0	0	0	0	0	0	0	0	0	0	0	0	0	0	0	0	0	0	0	0	0	3.04884	0	0	0	0	0	0	0	0	0	0	0	0	0	0	0	0	0	0	0	0	0	0
PB.13016.78	Brip1	Brip1-S-78	ISM	2.47719	2.04954	0	0	0	0	0	0	0	0	0	1.80981	0	0	1.64244	2.91945	0	0	0	0	0	0	0	0	0	0	0	0	0	0	0	0	0	0	0	0	0	0	0	0	0	0	0	0	0	0
PB.24289.38	Fzd3	Fzd3-S-38	ISM	0	0	0	0	0	1.96174	0	0	0	0	1.99726	0	0	0	0	1.6832	0	0	1.92483	0	2.99065	0	0	0	0	0	0	2.87225	0	0	0	0	0	0	0	0	0	0	0	0	0	0	0	0	0	0
PB.42311.2	Hnrnpa3	Hnrnpa3-S-2	ISM	2.47719	0	0	2.79601	0	3.23659	0	2.055	0	0	3.00104	2.41757	3.05164	2.13636	2.87192	2.27886	1.57395	2.63759	1.92483	0	0	0	0	0	0	0	0	0	0	0	0	0	0	0	0	0	0	0	0	2.95272	0	0	0	0	0	0
PB.7973.10	Gm4924	Gm4924-S-10	FSM	0	0	0	0	0	0	0	0	0	0	1.99726	1.80981	0	0	0	0	0	0	0	0	0	0	2.97402	0	2.74483	0	0	0	0	0	0	0	0	0	0	0	0	0	0	0	0	0	0	0	0	0
PB.24547.57	Gm49164	Gm49164-S-57	FSM	0	0	0	0	0	0	0	0	0	0	0	1.80981	0	0	0	0	0	0	1.92483	2.84395	2.99065	0	2.97402	0	0	3.37154	0	0	0	0	0	0	0	0	0	0	0	0	0	0	0	0	0	0	0	0
PB.66948.1	Myh14	Myh14-S-1	ISM	0	0	0	0	0	1.96174	0	0	0	0	0	0	0	0	0	0	0	0	0	0	0	0	0	0	0	0	0	0	0	0	0	0	0	0	0	0	0	0	0	0	0	0	0	0	0	0
PB.35351.52	Ttc39c	Ttc39c-S-52	ISM	1.86468	2.04954	2.11911	2.16213	0	2.96193	0	2.68196	2.82934	0	1.99726	2.41757	0	0	0	1.6832	1.57395	0	0	0	0	0	3.64129	0	0	0	0	0	0	0	0	0	0	0	0	0	0	0	0	0	0	0	0	0	0	0
PB.23556.69	Ktn1	Ktn1-S-69	ISM	0	2.67612	0	0	0	0	2.09948	0	0	0	0	0	2.04338	0	2.23382	1.6832	0	0	2.54223	0	0	0	0	0	0	0	0	0	0	0	0	0	0	0	0	0	0	0	0	0	0	0	0	0	0	0
PB.19746.10	Riok1	Riok1-S-10	FSM	1.86468	3.05837	3.13424	2.16213	3.60758	3.23659	0	0	0	0	2.62014	3.06512	4.11822	3.82454	2.87192	4.43406	0	3.68734	1.92483	0	0	0	2.97402	0	3.40532	0	0	0	0	0	0	0	0	0	0	3.47019	0	0	0	0	0	0	0	0	0	0
PB.73404.88	Cog4	Cog4-S-88	FSM	0	0	0	0	0	1.96174	0	0	0	0	1.99726	1.80981	0	2.76866	1.64244	1.6832	1.57395	0	0	0	2.99065	0	0	0	0	0	0	0	0	0	0	0	3.77792	3.92256	3.13018	0	0	0	3.11123	0	0	0	0	0	0	0
PB.20204.230	Spin1	Spin1-S-230	ISM	0	0	0	0	0	0	0	0	0	0	2.62014	0	2.04338	0	1.64244	1.6832	0	0	0	0	2.99065	0	0	0	0	0	0	0	0	0	0	0	0	0	0	0	0	0	0	0	0	0	0	0	0	0
PB.20969.21	Zfp58	Zfp58-S-21	FSM	1.86468	0	0	0	0	0	0	0	0	0	1.99726	1.80981	0	2.76866	1.64244	2.27886	0	0	0	0	0	0	0	0	0	0	0	0	0	0	0	0	0	0	0	0	0	0	0	0	0	0	0	0	0	0
PB.7701.140	Bsg	Bsg-S-140	FSM	0	0	0	0	0	0	0	0	0	0	0	0	0	0	0	0	0	0	0	0	0	0	0	0	0	0	0	0	0	0	0	0	0	0	0	0	0	0	0	0	0	0	0	0	0	0
PB.59902.47	Prkrip1	Prkrip1-S-47	ISM	2.47719	2.04954	2.75031	2.16213	3.3289	0	0	2.055	0	0	3.00104	3.60454	3.32743	3.42993	2.60293	3.58524	2.15772	0	1.92483	0	0	0	0	0	0	0	0	0	0	0	0	0	0	0	0	0	0	0	0	0	0	0	0	0	0	0
PB.11700.4	Ubb	Ubb-S-4	FSM	1.86468	0	2.11911	0	0	0	0	0	0	0	2.62014	0	0	2.13636	0	2.6496	0	0	0	0	0	0	0	0	0	0	0	0	0	0	0	0	0	0	0	0	0	0	0	0	0	0	0	0	0	0
PB.4313.5	Prdx6	Prdx6-S-5	ISM	0	0	0	0	0	1.96174	0	0	0	0	0	0	0	0	0	0	0	0	0	0	0	0	0	4.11533	0	0	0	0	0	0	0	0	0	0	0	0	3.11271	0	0	0	0	0	0	0	0	0
PB.26695.13	Tatdn1	Tatdn1-S-13	NIC	0	0	0	0	0	0	0	0	0	0	0	0	0	0	0	0	0	0	0	0	0	0	0	0	0	0	0	0	0	0	0	0	3.10739	0	0	0	0	0	0	0	0	0	0	0	0	0
PB.8026.10	D10Wsu102e	D10Wsu102e-S-10	FSM	2.47719	2.04954	0	2.16213	2.2995	0	0	0	0	2.1791	3.00104	0	2.04338	2.13636	0	2.91945	1.57395	3.01892	0	0	0	0	0	0	0	0	0	0	0	0	0	0	0	0	0	0	0	0	0	0	0	0	0	0	0	0
PB.42965.150	Caprin1	Caprin1-S-150	ISM	1.86468	0	0	0	0	0	0	0	0	0	0	0	2.66954	0	0	1.6832	1.57395	2.01354	0	0	0	0	0	0	0	0	0	0	0	0	0	0	0	0	0	0	0	0	0	0	0	0	0	0	0	0
PB.3247.7	Rab3gap1	Rab3gap1-S-7	ISM	1.86468	0	0	0	0	0	0	0	0	0	1.99726	1.80981	3.32743	0	1.64244	1.6832	0	0	0	0	0	0	0	0	0	0	0	0	0	0	0	0	0	0	0	0	0	0	0	0	0	0	0	0	0	0
PB.80317.83	Dkc1	Dkc1-S-83	ISM	0	2.04954	0	0	2.2995	1.96174	0	0	0	0	0	1.80981	2.04338	0	2.23382	2.91945	0	0	0	0	0	0	0	0	0	0	0	0	0	0	0	0	0	0	0	0	0	0	0	0	0	0	0	0	0	0
PB.75373.287	Hspa8	Hspa8-S-287	NIC	2.85426	2.67612	2.11911	2.16213	0	2.58199	4.18139	0	0	2.1791	3.00104	3.45491	0	2.76866	3.53637	3.13174	2.15772	2.63759	0	0	0	3.43962	3.64129	3.04884	2.74483	2.71216	0	0	0	0	3.67839	4.89932	4.68039	5.00789	3.13018	3.47019	3.78336	3.63534	0	4.51951	4.96939	4.12752	4.3794	0	0	0
PB.5033.106	Brox	Brox-S-106	ISM	2.85426	0	2.11911	0	0	0	0	2.055	0	0	0	0	2.66954	3.15298	1.64244	2.27886	0	0	0	0	0	0	0	0	0	0	0	0	0	0	0	0	0	0	0	0	0	0	0	0	0	0	0	0	0	0
PB.51374.21	Mrpl50	Mrpl50-S-21	FSM	0	0	0	0	0	0	0	0	0	0	0	0	0	0	0	0	0	0	0	0	0	0	0	3.04884	0	0	0	0	0	0	3.01019	0	0	0	0	0	0	0	0	0	0	0	0	0	0	0
PB.24046.11	Sap18	Sap18-S-11	ISM	0	0	2.11911	0	0	1.96174	0	0	0	0	0	0	2.04338	0	2.23382	2.6496	1.57395	0	0	2.84395	0	0	0	0	2.74483	0	0	0	0	0	0	0	0	0	0	0	0	0	0	0	0	0	0	0	0	0
PB.77428.8	Rnf7	Rnf7-S-8	FSM	0	0	0	0	0	0	0	0	0	0	0	0	0	0	0	0	0	0	0	0	0	0	0	0	0	0	0	0	0	0	0	0	0	0	0	0	0	0	0	2.95272	0	0	0	0	0	0
PB.46930.30	2610316D01Rik	2610316D01Rik-S-30	FSM	0	2.67612	0	0	2.2995	0	2.09948	2.055	0	0	1.99726	0	2.04338	2.76866	1.64244	2.6496	1.57395	0	1.92483	0	2.99065	0	0	0	0	0	0	2.87225	0	0	0	0	0	0	0	0	0	0	0	0	0	0	0	0	0	0
PB.8936.112	Cct2	Cct2-S-112	ISM	1.86468	0	2.11911	0	0	1.96174	2.09948	0	0	0	1.99726	0	0	0	1.64244	3.13174	1.57395	2.01354	0	0	0	0	0	0	0	0	0	0	0	0	0	0	0	0	0	0	0	0	0	0	0	0	0	0	0	0
PB.55087.1	Errfi1	Errfi1-S-1	FSM	2.47719	3.05837	3.13424	2.16213	0	0	0	2.055	0	0	3.00104	2.79287	2.04338	2.76866	2.23382	1.6832	2.15772	0	0	0	0	0	2.97402	0	2.74483	2.71216	0	3.5367	0	0	0	0	0	0	3.13018	3.47019	3.78336	0	0	0	0	0	0	0	0	0
PB.8637.5	Ccdc59	Ccdc59-S-5	ISM	3.12744	2.67612	3.80538	0	3.3289	0	0	2.055	0	0	2.62014	2.41757	2.66954	3.15298	2.60293	3.58524	1.57395	2.63759	0	0	0	0	0	0	0	0	0	0	0	0	0	0	0	0	0	0	0	0	0	0	0	0	0	0	0	0
PB.68971.122	Arl6ip1	Arl6ip1-S-122	ISM	0	2.04954	0	0	0	0	0	0	0	0	0	1.80981	0	2.13636	1.64244	0	0	2.01354	0	0	0	0	2.97402	0	0	0	0	0	0	0	0	0	0	0	0	0	0	0	0	0	0	0	0	0	0	0
PB.75772.30	Btg4	Btg4-S-30	FSM	2.47719	2.04954	3.13424	0	3.60758	0	0	0	2.19357	0	0	2.79287	3.54337	2.13636	1.64244	2.6496	0	0	1.92483	0	0	0	0	0	0	2.71216	0	2.87225	0	0	0	0	0	0	0	0	0	0	0	0	0	0	0	0	0	0
PB.27422.8	Atf4	Atf4-S-8	FSM	0	0	0	0	0	0	0	0	0	0	1.99726	0	3.05164	0	0	1.6832	0	0	0	0	0	0	0	0	0	2.71216	0	0	0	0	0	0	0	0	3.13018	0	0	0	0	0	0	0	0	0	0	0
PB.53217.134	Zmpste24	Zmpste24-S-134	ISM	0	2.04954	0	0	0	1.96174	0	0	0	0	0	1.80981	0	0	1.64244	2.27886	0	0	0	0	0	0	0	0	0	0	0	0	0	0	0	0	0	0	0	0	0	0	0	0	0	0	0	0	0	0
PB.55545.126	Dbf4	Dbf4-S-126	FSM	0	0	0	0	0	3.23659	0	0	0	0	0	2.41757	3.05164	3.15298	3.25834	3.13174	0	2.01354	2.54223	0	0	0	0	0	2.74483	0	0	0	0	0	0	0	0	0	0	0	0	0	0	0	0	0	0	0	0	0
PB.54823.32	Rex2	Rex2-S-32	NNC	0	0	0	0	0	0	0	0	0	0	0	0	0	0	0	0	0	0	0	0	0	0	0	0	0	0	0	0	0	0	0	0	0	0	0	0	0	0	0	0	0	0	3.6987	0	0	0
PB.58659.31	Alkbh2	Alkbh2-S-31	FSM	0	0	0	0	0	0	0	2.68196	0	0	0	0	0	0	0	0	0	0	0	2.84395	0	0	0	0	0	0	0	0	0	0	0	0	0	0	0	0	0	0	3.11123	0	0	0	0	0	0	0
PB.11272.14	Gpx3	Gpx3-S-14	FSM	5.03506	4.75353	5.04213	5.1368	4.60177	3.77922	5.06614	5.92793	5.60538	5.32202	4.34932	4.73095	4.00247	4.96217	3.65091	4.26443	5.73941	5.34076	5.53229	4.7387	5.02512	0	3.64129	0	4.08173	3.7655	4.70192	4.21519	4.62482	4.4043	3.01019	3.31925	3.77792	4.8269	3.80123	4.14766	4.46507	4.71621	3.11123	0	0	0	3.6987	3.88715	0	0
PB.27697.132	Pacsin2	Pacsin2-S-132	ISM	0	2.04954	2.11911	0	2.2995	0	0	0	0	0	0	0	3.32743	0	1.64244	2.6496	1.57395	0	0	0	0	0	0	0	2.74483	0	0	0	0	0	0	0	0	0	0	0	0	0	0	0	0	0	0	0	0	0
PB.40961.1	Trub2	Trub2-S-1	ISM	0	0	0	0	0	0	0	0	0	0	0	0	0	0	0	0	0	0	0	0	0	0	0	0	0	0	0	0	0	0	0	0	0	0	3.13018	0	0	2.96822	0	0	0	0	0	0	0	0
PB.23338.7	Prxl2a	Prxl2a-S-7	ISM	0	0	0	0	0	0	0	0	0	0	0	0	0	0	0	0	0	0	0	2.84395	0	0	0	0	0	2.71216	0	0	0	0	0	0	0	3.24901	0	0	0	0	0	0	0	0	0	0	0	0
PB.63871.79	Bms1	Bms1-S-79	ISM	0	2.04954	2.75031	0	0	1.96174	0	2.055	0	2.1791	3.81951	1.80981	3.72086	2.13636	2.23382	3.98142	2.52389	2.01354	3.19524	0	0	0	0	0	0	0	0	0	0	0	0	0	0	0	0	0	0	0	0	0	0	0	0	0	0	0
PB.1183.1	Wdr75	Wdr75-S-1	ISM	2.85426	0	0	0	2.94119	0	0	0	0	0	3.00104	2.79287	3.54337	3.42993	0	2.91945	0	2.63759	0	0	0	0	0	0	0	0	0	0	0	0	0	0	0	0	0	0	0	0	0	0	0	0	0	0	0	0
PB.61896.37	Cul1	Cul1-S-37	NNC	0	2.04954	2.11911	0	2.94119	0	0	0	0	0	1.99726	1.80981	2.66954	2.13636	0	1.6832	0	0	0	0	0	0	0	0	0	0	0	0	0	0	0	0	0	0	0	0	0	0	0	0	0	0	0	0	0	0
PB.72320.43	Usp38	Usp38-S-43	ISM	0	0	0	0	2.2995	0	0	0	0	0	0	1.80981	0	0	0	0	0	0	0	2.84395	3.65835	0	2.97402	0	2.74483	0	0	0	0	0	0	0	0	0	0	0	0	0	0	0	0	0	0	0	0	0
PB.33879.9	Chaf1a	Chaf1a-S-9	ISM	1.86468	0	0	0	0	0	0	0	0	0	0	1.80981	0	2.13636	0	0	0	0	1.92483	2.84395	0	0	0	0	0	0	0	0	0	0	0	0	0	0	0	0	0	0	0	0	0	0	0	0	0	0
PB.10158.54	C1d	C1d-S-54	NNC	0	0	0	0	0	0	0	0	0	0	0	0	0	0	0	0	0	0	0	0	0	0	0	0	3.79966	0	2.80904	0	0	0	0	3.31925	0	0	4.70402	3.47019	0	0	0	0	3.88458	0	0	0	0	0
PB.40137.22	Gm10857	Gm10857-S-22	FSM	1.86468	0	2.11911	2.16213	0	2.58199	2.09948	2.68196	0	2.1791	0	1.80981	0	2.13636	2.23382	0	2.79133	0	2.92112	0	2.99065	0	2.97402	0	2.74483	0	0	0	0	0	0	0	0	0	0	0	0	0	0	0	0	0	0	0	0	0
PB.36361.70	Cdo1	Cdo1-S-70	ISM	0	0	0	0	0	0	0	0	0	2.1791	0	1.80981	2.04338	2.13636	1.64244	2.6496	0	0	0	0	0	0	0	0	0	0	0	0	0	0	0	0	0	0	0	0	0	0	0	0	0	0	0	0	0	0
PB.66335.5	Fam98c	Fam98c-S-5	ISM	0	2.04954	0	0	0	0	0	0	0	0	0	0	2.04338	0	0	0	0	0	0	0	0	0	0	0	0	0	0	0	0	0	0	0	0	0	0	0	0	0	0	0	0	0	0	0	0	0
PB.39132.1	Plce1	Plce1-S-1	ISM	1.86468	0	0	0	0	0	0	0	2.19357	0	0	0	2.04338	0	1.64244	2.91945	0	0	0	0	0	0	0	0	0	0	0	2.87225	0	0	0	0	0	0	0	0	0	0	0	0	0	0	0	0	0	0
PB.31590.12	Gm49719	Gm49719-S-12	NNC	1.86468	0	0	0	0	1.96174	0	0	0	0	0	0	2.04338	2.13636	2.23382	0	0	0	0	0	2.99065	0	0	0	0	0	0	0	0	0	0	0	0	0	0	0	0	0	0	0	0	0	0	0	0	0
PB.14747.71	H3f3b	H3f3b-S-71	ISM	0	0	2.11911	0	0	0	2.09948	0	0	0	1.99726	0	0	0	0	0	0	0	1.92483	2.84395	0	0	0	0	0	0	0	0	0	0	0	0	0	0	0	0	0	0	0	0	0	0	0	0	0	0
PB.39642.112	Sfr1	Sfr1-S-112	NIC	3.34178	4.62952	4.63989	2.16213	2.2995	4.46089	2.72941	0	2.19357	0	4.63377	3.84979	5.04653	4.72764	4.48326	5.33267	2.52389	4.52023	3.19524	2.84395	0	0	0	0	2.74483	0	0	0	0	0	0	0	0	0	0	0	0	0	0	0	0	0	0	0	0	0
PB.74761.69	Ppan	Ppan-S-69	FSM	0	2.67612	2.11911	3.18091	3.60758	1.96174	2.72941	0	2.19357	2.1791	0	2.79287	0	3.15298	0	0	3.00213	2.01354	0	0	0	0	3.64129	0	2.74483	3.37154	2.80904	2.87225	0	0	4.76001	4.39345	4.17573	0	3.13018	4.83288	0	2.96822	4.1797	2.95272	0	0	0	0	0	0
PB.69584.23	Plekha1	Plekha1-S-23	ISM	1.86468	0	0	0	0	0	0	0	0	0	1.99726	1.80981	2.04338	2.76866	1.64244	0	0	0	0	0	0	0	0	0	0	0	0	0	0	0	0	0	0	0	0	0	0	0	0	0	0	0	0	0	0	0
PB.59472.3	Tmem132c	Tmem132c-S-3	FSM	2.85426	2.67612	3.41098	3.18091	2.94119	0	0	2.055	3.21493	3.69366	3.95029	3.06512	3.05164	3.15298	0	0	2.15772	0	1.92483	0	0	0	0	0	0	3.7655	0	2.87225	3.94143	0	0	0	0	0	0	0	0	0	0	0	0	0	0	0	0	0
PB.52008.155	Psip1	Psip1-S-155	ISM	0	0	0	0	0	0	0	0	0	0	0	2.41757	2.04338	2.13636	0	0	1.57395	0	1.92483	0	0	0	0	0	0	0	0	0	0	0	0	0	0	0	0	0	0	0	0	0	0	0	0	0	0	0
PB.42050.62	Ssb	Ssb-S-62	FSM	0	0	2.11911	0	0	0	0	0	0	0	0	0	2.04338	2.13636	1.64244	2.27886	0	0	0	0	0	0	0	0	0	0	0	2.87225	0	0	0	0	0	0	0	0	0	0	0	0	0	0	0	0	0	0
PB.7534.29	Gm5134	Gm5134-S-29	NNC	2.85426	3.72776	2.75031	3.18091	0	3.45185	2.09948	3.55633	3.49252	3.69366	3.49177	3.27889	3.72086	3.42993	3.25834	3.13174	3.17614	2.63759	2.92112	3.903	0	0	2.97402	3.04884	0	3.37154	4.14909	2.87225	3.94143	0	0	0	0	0	0	0	0	0	0	0	0	0	0	0	0	0
PB.24635.39	Gpalpp1	Gpalpp1-S-39	FSM	0	0	0	2.16213	0	0	0	0	0	0	0	1.80981	0	2.13636	0	0	0	0	0	2.84395	0	0	0	0	0	0	0	2.87225	0	0	0	3.31925	3.10739	3.92256	3.13018	3.47019	0	0	3.78185	4.01592	4.56739	0	0	0	4.19825	5.554
PB.24376.42	Cdca2	Cdca2-S-42	NIC	1.86468	0	0	0	0	0	0	0	2.19357	0	0	0	0	0	1.64244	0	0	2.01354	1.92483	0	0	0	0	0	0	0	0	0	0	0	0	0	0	0	0	0	0	0	0	0	0	0	0	0	0	0
PB.75216.11	Srpr	Srpr-S-11	ISM	1.86468	2.67612	2.11911	0	2.2995	1.96174	0	0	0	0	1.99726	3.06512	0	2.13636	1.64244	0	0	2.63759	1.92483	0	0	0	0	0	2.74483	0	0	0	0	0	0	0	0	0	0	0	0	0	0	0	0	0	0	0	0	0
PB.45031.51	Srsf6	Srsf6-S-51	ISM	0	0	0	0	0	0	0	0	0	0	0	0	0	0	0	0	0	0	0	0	0	0	0	0	0	0	0	0	0	0	0	3.31925	3.77792	3.24901	0	0	0	0	0	0	0	0	0	0	0	0
PB.75843.275	Cul5	Cul5-S-275	NIC	0	0	0	0	2.2995	0	0	2.055	0	0	0	0	2.04338	0	1.64244	3.58524	0	0	0	0	0	0	0	0	2.74483	0	0	0	0	0	0	0	0	0	0	0	0	0	0	0	0	0	0	0	0	0
PB.73029.163	Nae1	Nae1-S-163	ISM	0	2.04954	0	0	0	0	0	0	0	0	1.99726	0	2.04338	2.13636	0	2.27886	0	0	0	0	0	0	0	0	0	0	0	0	0	0	0	0	0	0	0	0	0	0	0	0	0	0	0	0	0	0
PB.71645.8	Hmgb2	Hmgb2-S-8	ISM	3.34178	3.05837	4.2034	2.79601	2.94119	1.96174	0	0	0	0	4.16958	4.04659	4.31593	3.15298	3.65091	4.43406	2.52389	3.01892	0	0	2.99065	0	0	0	3.79966	0	0	0	0	0	0	0	0	0	0	0	0	0	0	0	0	0	0	0	0	0
PB.58037.8	Cops4	Cops4-S-8	ISM	0	0	0	0	2.2995	0	0	0	0	0	1.99726	0	0	2.13636	1.64244	2.27886	1.57395	0	0	0	0	0	0	0	0	0	0	0	0	0	0	0	0	0	0	0	0	0	0	0	0	0	0	0	0	0
PB.16942.5	2700049A03Rik	2700049A03Rik-S-5	ISM	0	2.04954	2.11911	0	0	0	0	0	2.19357	0	2.62014	1.80981	0	0	1.64244	1.6832	0	0	0	0	0	0	0	0	0	2.71216	0	0	0	0	0	0	0	0	0	0	0	0	0	0	0	0	0	0	0	0
PB.8458.3	Eea1	Eea1-S-3	ISM	0	0	0	0	0	0	0	0	0	0	2.62014	1.80981	2.66954	2.13636	1.64244	0	1.57395	2.01354	0	0	0	0	0	0	0	0	0	0	0	0	0	0	0	0	0	0	0	0	0	0	0	0	0	0	0	0
PB.24186.3	Wdfy2	Wdfy2-S-3	NNC	0	0	0	0	0	0	0	0	0	0	0	0	0	0	0	0	0	0	0	0	0	0	0	3.04884	0	0	0	0	0	0	3.01019	0	0	0	3.13018	0	0	0	0	0	0	4.12752	0	0	0	0
PB.32588.121	Srpk1	Srpk1-S-121	ISM	1.86468	0	2.11911	0	0	1.96174	0	0	0	0	0	2.79287	2.04338	0	2.60293	1.6832	2.15772	2.63759	0	0	0	0	0	0	0	0	0	0	0	0	0	0	0	0	0	0	0	0	0	0	0	0	0	0	0	0
PB.50924.32	Dnaja1	Dnaja1-S-32	ISM	4.11075	3.05837	3.95635	3.18091	4.15551	3.62887	2.09948	2.055	2.19357	2.1791	4.42837	3.60454	4.22195	3.97556	3.75367	4.48476	0	4.28203	1.92483	0	0	0	0	0	0	0	0	0	0	0	0	0	0	0	0	0	0	0	0	0	0	0	0	0	0	0
PB.57203.71	Slc30a9	Slc30a9-S-71	FSM	1.86468	0	0	2.16213	2.2995	1.96174	2.09948	2.055	2.19357	0	0	0	0	2.13636	0	0	0	0	0	0	0	0	0	0	0	0	0	0	0	0	0	0	0	0	0	0	0	0	0	0	0	0	0	0	0	0
PB.66315.98	Actn4	Actn4-S-98	NNC	0	0	0	0	0	0	0	0	0	0	0	0	0	0	0	0	0	0	0	0	0	0	0	0	0	0	0	0	0	0	0	0	0	0	0	0	0	0	0	0	0	0	0	0	0	0
PB.14362.124	Kpna2	Kpna2-S-124	ISM	0	0	2.11911	0	0	0	0	0	0	0	0	0	2.04338	0	1.64244	0	0	2.01354	0	0	0	0	0	0	0	0	0	2.87225	0	0	0	0	0	0	0	0	0	0	0	0	0	0	0	0	0	0
PB.1497.98	Clk1	Clk1-S-98	ISM	0	2.04954	0	0	0	0	0	0	0	0	1.99726	1.80981	2.04338	2.13636	0	1.6832	0	0	0	0	0	0	0	0	0	0	0	0	0	0	0	0	0	0	0	0	0	0	0	0	0	0	0	0	0	0
PB.20431.2	Prr7	Prr7-S-2	FSM	0	0	0	0	0	0	0	0	0	0	0	1.80981	2.66954	2.13636	1.64244	0	0	0	0	2.84395	0	0	0	0	0	0	0	0	0	0	0	0	0	0	0	0	0	0	0	0	0	0	0	0	0	0
PB.31763.11	Mrpl18	Mrpl18-S-11	NNC	0	0	0	0	0	0	0	0	0	0	0	0	0	0	0	0	0	0	0	0	0	0	0	0	0	0	0	2.87225	0	0	0	0	3.10739	0	0	0	3.11271	0	3.11123	0	0	0	0	0	0	0
PB.36749.3	Csnk1a1	Csnk1a1-S-3	ISM	1.86468	2.67612	2.11911	0	0	2.96193	0	0	0	2.1791	1.99726	2.79287	3.54337	3.15298	2.60293	2.91945	1.57395	2.01354	1.92483	0	0	0	0	0	0	0	0	0	0	0	0	0	0	0	0	0	0	0	0	0	0	0	0	0	0	0
PB.24081.34	Cdadc1	Cdadc1-S-34	ISM	0	0	0	0	0	0	0	0	0	0	0	0	0	0	0	0	1.57395	0	0	0	0	0	0	0	0	0	0	0	0	0	0	0	0	0	0	0	0	0	0	0	0	0	0	0	0	0
PB.35157.41	Rab18	Rab18-S-41	ISM	1.86468	2.67612	2.11911	0	0	0	0	0	0	2.1791	1.99726	0	2.04338	2.13636	0	2.91945	0	0	1.92483	0	0	0	0	0	0	0	0	0	0	0	0	0	0	0	0	0	0	0	0	0	0	0	0	0	0	0
PB.6569.41	1700021F05Rik	1700021F05Rik-S-41	ISM	0	0	0	0	0	0	0	0	0	0	0	0	0	0	0	1.6832	0	0	0	0	0	0	0	0	0	0	0	0	0	0	0	0	0	0	0	3.47019	0	0	0	0	0	0	0	0	0	0
PB.49933.480	Nexn	Nexn-S-480	NIC	0	0	0	0	0	0	0	0	0	0	0	0	0	2.13636	0	1.6832	1.57395	3.01892	2.54223	0	0	0	0	0	0	0	0	0	0	0	0	0	0	0	0	0	0	0	0	0	0	0	0	0	0	0
PB.64673.284	Ldhb	Ldhb-S-284	ISM	0	0	0	0	0	0	2.09948	0	0	0	2.62014	0	3.05164	2.13636	2.60293	0	0	0	0	0	0	0	0	0	0	0	0	0	0	0	0	0	0	0	0	0	0	0	0	0	0	0	0	0	0	0
PB.53179.156	Ctps	Ctps-S-156	ISM	1.86468	0	0	0	0	1.96174	0	0	0	0	1.99726	1.80981	0	2.13636	1.64244	2.27886	0	2.01354	0	0	0	0	0	0	2.74483	0	0	0	0	0	0	0	0	0	0	0	0	0	0	0	0	0	0	0	0	0
PB.11184.80	Gdf9	Gdf9-S-80	FSM	0	0	0	0	0	2.58199	0	0	0	0	2.62014	1.80981	2.04338	0	2.23382	1.6832	2.52389	0	0	0	3.65835	0	0	3.04884	0	0	0	0	0	0	0	0	0	0	0	0	0	0	0	0	0	0	0	0	0	0
PB.50844.21	Lingo2	Lingo2-S-21	NNC	0	0	0	0	0	0	0	0	0	0	2.62014	1.80981	0	0	2.87192	1.6832	0	0	0	2.84395	0	0	0	0	4.08173	3.7655	0	0	0	0	0	0	0	0	0	0	0	0	0	0	0	0	0	0	0	0
PB.61896.40	Cul1	Cul1-S-40	FSM	0	2.04954	0	0	2.2995	0	0	0	0	0	0	2.79287	3.05164	3.42993	1.64244	2.6496	1.57395	0	0	0	0	0	0	0	0	0	0	0	0	0	0	0	0	0	0	0	0	0	0	0	0	0	0	0	0	0
PB.5597.2	Shprh	Shprh-S-2	FSM	0	2.04954	2.11911	0	0	0	0	0	0	0	0	0	0	2.13636	1.64244	1.6832	0	0	0	0	0	0	0	0	0	0	0	2.87225	0	0	0	0	0	0	0	0	0	0	0	0	0	0	0	0	0	0
PB.77379.94	U2surp	U2surp-S-94	ISM	0	0	2.11911	0	0	1.96174	0	0	0	0	1.99726	0	0	2.13636	1.64244	2.6496	0	0	0	0	0	0	0	0	0	0	0	0	0	0	0	0	0	0	0	0	0	0	0	0	0	0	0	0	0	0
PB.58430.49	A430073D23Rik	A430073D23Rik-S-49	NNC	0	0	0	0	0	0	0	0	0	0	0	0	0	0	0	0	0	0	0	0	0	0	0	0	0	0	0	0	0	0	0	0	0	0	0	0	0	0	0	0	0	0	0	0	0	0
PB.43002.59	Cstf3	Cstf3-S-59	ISM	1.86468	0	2.11911	0	0	0	0	0	0	0	0	0	2.04338	0	1.64244	0	0	2.01354	0	0	0	0	0	0	0	0	0	0	0	0	0	0	0	0	0	0	0	0	0	0	0	0	0	0	0	0
PB.22845.34	E330034G19Rik	E330034G19Rik-S-34	ISM	3.12744	4.3229	4.2034	3.45816	3.3289	1.96174	0	0	2.82934	0	3.81951	3.95302	4.22195	3.42993	3.08368	3.98142	0	2.01354	2.54223	0	2.99065	0	0	0	3.40532	0	0	0	0	0	0	0	0	0	0	0	0	0	0	0	0	0	0	0	0	0
PB.4180.50	Soat1	Soat1-S-50	FSM	1.86468	2.04954	0	0	0	0	0	2.055	0	0	1.99726	0	0	2.13636	1.64244	3.13174	0	0	0	0	0	0	0	0	0	0	0	0	0	0	0	0	0	0	0	0	0	0	0	0	0	0	0	0	0	0
PB.24476.59	Npm2	Npm2-S-59	NNC	0	2.04954	0	0	2.2995	0	0	0	0	0	0	1.80981	2.04338	0	2.23382	1.6832	0	2.01354	0	0	0	0	0	0	0	0	0	0	0	0	0	0	0	0	0	0	0	0	0	0	0	0	0	0	0	0
PB.10637.502	Npm1	Npm1-S-502	ISM	0	2.04954	2.11911	0	2.2995	0	0	0	0	0	1.99726	1.80981	2.04338	2.13636	0	3.45567	0	0	0	0	0	0	2.97402	0	0	0	0	0	0	0	0	0	0	0	0	0	0	0	0	0	0	0	0	0	0	0
PB.7563.65	Pcnt	Pcnt-S-65	NNC	2.47719	2.04954	2.11911	0	0	1.96174	0	0	0	0	0	1.80981	2.04338	2.13636	2.23382	3.30676	0	2.63759	0	0	0	0	0	0	0	0	0	0	0	0	0	0	0	0	0	0	0	0	0	0	0	0	0	0	0	0
PB.34365.51	Myl12a	Myl12a-S-51	NNC	1.86468	2.04954	0	0	2.2995	0	0	0	0	0	0	0	0	0	0	1.6832	0	0	0	0	0	0	0	0	0	2.71216	0	0	0	0	0	0	0	0	0	0	0	0	0	0	0	0	0	0	0	0
PB.66817.26	Zfp977	Zfp977-S-26	FSM	0	0	0	0	0	0	0	0	0	0	0	0	0	0	0	0	0	0	0	0	0	0	0	0	0	0	0	0	0	0	0	3.31925	0	0	3.13018	0	0	0	0	4.01592	0	0	3.6987	0	0	0
PB.24476.70	Npm2	Npm2-S-70	NNC	0	0	0	2.16213	0	1.96174	0	0	0	0	0	2.41757	0	0	0	0	0	0	0	0	0	3.43962	0	0	3.40532	0	0	0	0	0	0	0	0	0	0	0	0	0	0	0	0	0	0	0	0	0
PB.7300.5	Arid5b	Arid5b-S-5	NNC	2.47719	3.05837	2.75031	2.16213	4.28708	3.23659	2.09948	0	2.82934	0	3.66901	3.60454	3.72086	3.42993	3.25834	4.38065	2.52389	2.63759	2.54223	0	0	0	2.97402	0	3.40532	0	0	0	0	0	0	0	0	0	0	0	0	0	0	0	0	0	0	0	0	0
PB.42050.1	Ssb	Ssb-S-1	ISM	4.1964	4.69344	5.292	2.16213	4.40333	4.30866	2.72941	3.06435	2.19357	2.1791	4.90339	5.34939	5.62178	5.62524	4.93113	6.00195	2.52389	4.5885	3.8677	0	2.99065	0	0	0	0	0	0	0	0	0	0	0	0	0	0	0	0	0	0	0	0	0	0	0	0	0
PB.73431.91	Ddx19a	Ddx19a-S-91	FSM	2.47719	0	0	0	0	1.96174	0	2.055	0	0	1.99726	0	2.66954	2.13636	0	2.27886	0	0	0	0	0	0	0	0	0	0	0	0	0	0	0	0	0	0	0	0	0	0	0	0	0	0	0	0	0	0
PB.28061.91	Zcrb1	Zcrb1-S-91	ISM	5.55037	5.28404	6.3367	4.93744	5.52997	4.76322	4.18139	4.13134	3.70956	2.81401	5.22411	5.03876	6.0965	5.41636	4.69466	5.71509	3.84819	5.30917	3.73715	3.50757	0	0	0	0	2.74483	0	0	0	0	0	0	0	0	0	0	0	0	0	0	0	0	0	0	0	0	0
PB.43659.18	Dut	Dut-S-18	ISM	2.47719	2.04954	3.13424	0	0	0	2.09948	0	0	0	1.99726	0	2.66954	2.13636	0	1.6832	1.57395	2.01354	0	0	0	0	0	0	0	0	0	0	0	0	0	0	0	0	0	0	0	0	0	0	0	0	0	0	0	0
PB.36986.145	Ptpn2	Ptpn2-S-145	FSM	1.86468	0	2.11911	2.16213	2.2995	0	0	0	0	0	1.99726	1.80981	2.66954	0	2.23382	2.27886	0	0	0	0	0	0	0	0	0	0	0	0	0	0	3.01019	0	0	0	0	0	0	0	0	0	0	0	0	0	0	0
PB.53376.104	Cdca8	Cdca8-S-104	NNC	1.86468	2.04954	2.11911	0	0	0	0	0	0	0	0	0	0	0	0	1.6832	0	0	0	0	0	0	0	0	0	0	0	0	0	0	0	0	0	0	0	0	0	0	0	0	0	0	0	0	0	0
PB.22337.1	Hmgcs1	Hmgcs1-S-1	FSM	1.86468	0	2.11911	0	0	0	0	0	0	0	0	0	2.66954	2.13636	2.87192	2.27886	0	0	0	0	0	0	0	0	0	0	0	0	0	0	0	0	0	0	0	0	0	0	0	0	0	0	0	0	0	0
PB.7935.105	Tle6	Tle6-S-105	ISM	0	0	0	0	0	0	0	2.055	0	0	0	2.41757	0	2.13636	2.60293	2.27886	0	0	0	0	0	0	0	0	0	0	0	0	0	0	0	0	0	0	0	0	0	0	0	0	0	0	0	0	0	0
PB.55455.4	Akap9	Akap9-S-4	ISM	1.86468	0	0	0	0	0	0	0	0	0	0	1.80981	2.04338	0	1.64244	2.27886	1.57395	0	2.92112	0	2.99065	0	0	0	0	0	0	0	0	0	0	0	0	0	0	0	0	0	0	0	0	0	0	0	0	0
PB.70728.71	Gins4	Gins4-S-71	ISM	0	0	0	0	2.2995	0	0	0	0	0	2.62014	1.80981	2.04338	0	0	0	1.57395	0	0	0	0	0	0	0	0	0	0	0	0	0	0	0	0	0	0	0	0	0	0	0	0	0	0	0	0	0
PB.46688.6	Fxr1	Fxr1-S-6	ISM	2.47719	3.33425	3.41098	0	3.60758	1.96174	0	0	2.82934	0	4.56988	3.06512	4.00247	4.10675	2.87192	4.26443	0	3.68734	0	0	0	0	0	0	0	0	0	0	0	0	0	0	0	0	0	0	0	0	0	0	0	0	0	0	0	0
PB.16767.49	Mis18bp1	Mis18bp1-S-49	ISM	1.86468	3.05837	2.11911	0	2.2995	1.96174	0	0	2.19357	2.81401	1.99726	3.45491	3.05164	3.42993	3.40699	4.20083	0	0	1.92483	0	0	0	0	0	0	0	0	0	0	0	0	0	0	0	0	0	0	0	0	0	0	0	0	0	0	0
PB.2499.116	Hjurp	Hjurp-S-116	ISM	0	2.04954	2.11911	0	0	0	0	0	0	0	1.99726	0	0	0	1.64244	0	0	0	1.92483	0	0	0	0	0	0	0	0	0	0	0	0	0	0	0	0	0	0	0	0	0	0	0	0	0	0	0
PB.7669.52	Pdxk	Pdxk-S-52	ISM	0	0	0	0	0	0	0	0	0	0	0	0	0	0	0	0	0	0	0	0	0	0	2.97402	0	0	0	0	0	0	0	3.01019	3.99414	0	0	0	0	0	0	0	2.95272	0	0	4.3794	0	0	0
PB.58363.88	Tmed5	Tmed5-S-88	FSM	0	0	0	0	0	0	0	0	0	0	0	0	0	0	0	1.6832	0	0	0	0	0	0	0	0	0	0	0	0	0	0	0	0	0	3.24901	0	0	0	0	3.11123	2.95272	0	0	0	0	0	0
PB.11218.106	Rad50	Rad50-S-106	ISM	0	2.04954	0	0	0	0	0	0	0	0	1.99726	0	0	2.76866	0	2.91945	1.57395	0	0	0	0	0	0	0	0	0	0	0	0	0	0	0	0	0	0	0	0	0	0	0	0	0	0	0	0	0
PB.35826.8	Pkd2l2	Pkd2l2-S-8	NNC	1.86468	0	2.11911	0	2.2995	2.96193	2.09948	0	0	0	1.99726	2.41757	2.04338	3.15298	2.23382	2.6496	0	2.63759	2.54223	0	0	0	0	0	3.79966	0	0	0	0	0	0	0	0	0	0	0	0	0	0	0	0	0	0	0	0	0
PB.76244.424	Kif23	Kif23-S-424	ISM	0	2.04954	0	0	0	0	0	0	0	0	0	1.80981	0	2.76866	0	2.91945	1.57395	0	2.54223	0	0	0	0	0	0	0	0	0	0	0	0	0	0	0	0	0	0	0	0	0	0	0	0	0	0	0
PB.30210.1	Pla1a	Pla1a-S-1	NNC	0	2.04954	0	2.79601	0	0	0	2.055	0	2.1791	0	1.80981	2.04338	0	2.23382	0	0	0	0	0	0	0	0	0	0	0	0	2.87225	0	0	0	0	0	0	0	0	0	0	0	0	0	0	0	0	0	0
PB.44682.287	Eif2s2	Eif2s2-S-287	ISM	0	0	0	0	0	0	0	0	0	0	0	0	0	0	0	0	0	0	0	0	2.99065	3.43962	0	0	0	0	0	0	0	0	0	3.31925	0	0	0	0	0	0	0	0	0	0	0	0	0	0
PB.43746.13	Blvra	Blvra-S-13	NIC	5.19837	4.56122	4.70823	3.67498	4.60177	4.22287	3.78354	3.73388	4.17034	3.87183	4.26348	3.73467	2.66954	3.64657	2.23382	3.58524	4.13053	4.08443	3.73715	3.50757	4.05518	0	0	0	0	2.71216	0	0	0	0	0	0	0	0	0	0	0	0	0	0	3.88458	0	0	3.88715	0	0
PB.42050.36	Ssb	Ssb-S-36	FSM	2.47719	2.67612	0	2.16213	3.3289	2.58199	0	2.055	2.19357	0	4.26348	3.27889	3.72086	2.13636	3.65091	4.919	0	3.68734	2.92112	0	0	0	3.64129	0	0	0	0	0	0	0	0	0	0	0	0	0	0	0	0	0	0	0	0	0	0	0
PB.60440.31	Pdap1	Pdap1-S-31	ISM	3.51819	3.55023	3.6275	2.16213	3.3289	2.58199	2.72941	0	2.19357	0	3.00104	3.27889	4.11822	4.32659	2.87192	2.91945	0	2.01354	2.54223	2.84395	0	0	0	0	0	0	0	0	0	0	0	3.99414	0	0	0	0	0	0	0	0	0	0	0	0	0	0
PB.71645.18	Hmgb2	Hmgb2-S-18	FSM	4.34839	4.12518	4.56652	3.18091	3.3289	3.45185	2.09948	0	2.19357	2.1791	4.42837	3.95302	5.277	3.97556	3.93208	4.6652	2.15772	3.01892	2.54223	3.903	3.65835	0	3.64129	3.04884	3.40532	0	2.80904	0	0	0	0	0	3.10739	0	0	0	0	0	0	0	0	0	0	0	0	0
PB.49933.521	Nexn	Nexn-S-521	NIC	0	2.04954	0	0	2.2995	0	0	0	0	0	0	1.80981	2.04338	0	1.64244	0	0	0	0	0	0	0	0	0	0	0	0	0	0	0	0	0	0	0	0	0	0	0	0	0	0	0	0	0	0	0
PB.81745.51	Smc1a	Smc1a-S-51	ISM	1.86468	2.04954	0	0	0	1.96174	0	0	0	0	1.99726	0	2.04338	2.76866	1.64244	2.91945	1.57395	0	0	0	0	3.43962	0	0	0	0	0	0	0	0	0	0	0	0	0	0	0	0	0	0	0	0	0	0	0	0
PB.6432.48	Cdc40	Cdc40-S-48	ISM	0	0	2.11911	2.16213	2.2995	1.96174	0	2.055	0	0	2.62014	2.41757	2.66954	2.76866	2.23382	2.27886	0	2.01354	1.92483	0	0	0	0	0	0	0	0	0	0	0	0	0	0	0	0	0	0	0	0	0	0	0	0	0	0	0
PB.2333.21	Gm10553	Gm10553-S-21	FSM	0	0	0	0	0	0	0	0	0	0	0	0	0	0	0	0	0	0	0	0	0	0	0	0	0	0	0	0	0	0	0	0	0	0	0	0	3.11271	0	3.11123	0	3.88458	0	0	0	0	0
PB.39724.8	Smndc1	Smndc1-S-8	ISM	2.85426	2.04954	2.75031	2.79601	2.2995	0	0	2.055	0	2.81401	1.99726	0	0	0	2.23382	1.6832	1.57395	0	1.92483	2.84395	0	0	2.97402	3.04884	0	0	0	2.87225	0	0	3.01019	0	0	0	0	3.47019	3.11271	0	0	0	0	0	3.6987	0	0	0
PB.15692.108	Gm49698	Gm49698-S-108	NNC	0	0	2.11911	2.16213	2.94119	1.96174	2.09948	0	0	2.1791	0	0	2.04338	0	0	0	1.57395	0	0	0	0	0	0	0	0	0	0	0	0	0	0	0	0	0	0	0	0	0	0	0	0	0	0	0	0	0
PB.17446.19	Rbm25	Rbm25-S-19	NIC	0	2.04954	2.11911	0	2.2995	0	0	0	0	2.1791	0	1.80981	0	2.13636	1.64244	1.6832	0	0	0	0	0	0	0	0	0	0	0	0	0	0	0	0	0	0	0	0	0	0	0	0	0	0	0	0	0	0
PB.20860.182	Nlrp4f	Nlrp4f-S-182	ISM	2.85426	2.67612	3.41098	0	2.94119	1.96174	2.09948	0	2.19357	0	2.62014	3.60454	3.05164	3.15298	1.64244	3.89611	0	2.63759	0	3.50757	0	0	0	0	2.74483	0	0	0	0	0	0	0	0	0	0	0	0	0	0	0	0	0	0	0	0	0
PB.71643.36	2500002B13Rik	2500002B13Rik-S-36	NNC	0	0	0	0	0	0	2.09948	0	0	0	0	0	0	0	0	0	0	0	0	0	0	0	0	0	0	0	0	0	0	0	0	0	3.77792	0	0	0	0	0	0	0	0	0	0	0	0	0
PB.76244.433	Kif23	Kif23-S-433	ISM	0	0	0	0	0	0	0	0	0	0	1.99726	0	0	3.15298	1.64244	2.27886	0	0	0	0	0	0	0	0	2.74483	0	0	0	0	0	0	0	0	0	0	0	0	0	0	0	0	0	0	0	0	0
PB.55135.6	Dnajc11	Dnajc11-S-6	ISM	0	0	0	0	0	0	0	0	0	0	0	0	0	0	0	0	0	0	0	0	0	0	0	0	0	0	0	0	0	0	0	0	0	0	0	0	0	0	0	0	0	0	0	0	0	0
PB.18087.32	Ddx24	Ddx24-S-32	FSM	3.51819	3.05837	3.6275	3.45816	4.15551	4.12902	3.38938	0	2.19357	2.1791	3.27621	3.84979	4.55422	4.5859	3.93208	4.88646	2.79133	3.68734	3.73715	0	0	0	2.97402	0	0	0	0	2.87225	0	0	0	0	0	0	0	0	0	0	0	0	0	0	0	0	0	0
PB.17446.18	Rbm25	Rbm25-S-18	NIC	0	2.04954	0	0	3.3289	1.96174	0	0	0	0	2.62014	2.79287	3.05164	0	2.23382	1.6832	0	0	1.92483	0	0	0	0	0	0	0	0	0	0	0	0	0	0	0	0	0	0	0	0	0	0	0	0	0	0	0
PB.58330.110	Evi5	Evi5-S-110	ISM	2.85426	3.33425	2.11911	2.79601	0	1.96174	2.09948	2.055	0	2.1791	1.99726	3.27889	4.22195	0	0	1.6832	2.15772	4.08443	2.54223	0	0	0	0	0	0	0	0	0	0	0	0	0	0	0	0	0	0	0	0	0	0	0	0	0	0	0
PB.2391.363	Ncl	Ncl-S-363	ISM	2.85426	4.00941	0	2.16213	0	0	2.09948	2.055	0	0	3.66901	3.60454	3.87154	3.42993	3.53637	4.43406	0	4.1881	2.54223	0	0	0	0	0	0	0	0	0	0	0	0	0	0	0	0	0	0	0	0	0	0	0	0	0	0	0
PB.74767.147	Dnmt1	Dnmt1-S-147	NIC	1.86468	0	0	0	0	0	0	0	2.19357	0	1.99726	0	0	0	1.64244	0	0	0	0	2.84395	0	0	0	0	0	0	0	0	0	0	0	0	0	0	0	0	0	0	0	0	0	0	0	0	0	0
PB.44983.3	Top1	Top1-S-3	ISM	3.51819	3.87847	3.41098	3.18091	2.94119	3.77922	2.72941	0	3.21493	2.81401	3.81951	3.60454	4.8032	4.10675	4.61538	5.01073	2.52389	3.68734	3.73715	0	2.99065	0	0	3.04884	0	0	0	0	0	0	0	0	0	0	0	0	0	0	0	0	0	0	0	0	0	0
PB.16966.3	Daam1	Daam1-S-3	ISM	0	0	0	0	0	0	0	2.055	0	0	1.99726	0	2.04338	2.13636	0	1.6832	0	0	0	0	0	0	0	0	0	0	0	0	0	0	0	0	0	0	0	0	0	0	0	0	0	0	0	0	0	0
PB.62157.18	Tax1bp1	Tax1bp1-S-18	ISM	0	2.04954	0	0	0	0	0	2.055	0	2.1791	1.99726	0	2.04338	2.13636	0	2.27886	0	0	0	0	0	0	0	0	0	0	0	0	0	0	0	0	0	0	0	0	0	0	0	0	0	0	0	0	0	0
PB.21182.14	Gm47469	Gm47469-S-14	ISM	0	0	0	0	0	0	0	0	0	0	0	0	0	0	0	0	0	0	0	0	0	0	0	0	0	0	0	0	0	0	0	0	0	0	0	0	0	0	0	0	0	0	0	0	0	0
PB.57608.3	Utp3	Utp3-S-3	FSM	0	0	2.11911	2.16213	0	0	2.09948	0	0	0	1.99726	2.41757	2.04338	0	0	2.91945	0	2.01354	0	0	0	0	0	0	0	0	0	0	0	0	0	0	0	0	0	0	0	0	0	0	0	0	0	0	0	0
PB.21865.772	Ccnb1	Ccnb1-S-772	ISM	0	2.04954	0	0	2.2995	0	0	0	0	0	0	1.80981	2.66954	0	1.64244	0	0	0	0	0	0	0	0	0	0	0	0	0	0	0	0	0	0	0	0	0	0	0	0	0	0	0	0	0	0	0
PB.18166.25	Papola	Papola-S-25	ISM	0	2.04954	0	0	2.2995	0	0	0	0	0	3.00104	0	2.66954	0	0	0	1.57395	0	1.92483	0	0	0	0	0	0	0	0	0	0	0	0	0	0	0	0	0	0	0	0	0	0	0	0	0	0	0
PB.56628.14	Lyar	Lyar-S-14	FSM	2.47719	2.04954	2.75031	2.16213	2.94119	0	0	0	0	0	2.62014	2.41757	3.54337	3.42993	3.08368	3.89611	1.57395	3.29432	2.54223	2.84395	0	0	0	0	0	0	0	0	0	0	0	0	0	0	0	0	0	0	0	0	0	0	0	0	0	0
PB.1345.42	Osgepl1	Osgepl1-S-42	ISM	0	0	0	0	0	0	0	0	0	0	0	0	0	2.13636	0	1.6832	0	0	0	0	0	0	0	0	0	3.37154	0	0	0	0	0	0	0	0	0	0	0	0	0	0	0	0	0	0	0	0
PB.8833.450	Tbc1d15	Tbc1d15-S-450	ISM	1.86468	2.04954	0	0	0	0	0	2.055	0	0	1.99726	0	2.04338	2.13636	0	1.6832	0	2.01354	0	0	0	0	0	0	2.74483	0	0	0	0	0	0	0	0	0	0	0	0	0	0	0	0	0	0	0	0	0
PB.39642.10	Sfr1	Sfr1-S-10	NNC	2.47719	0	0	0	0	0	0	0	2.19357	0	1.99726	1.80981	0	2.13636	0	0	0	0	0	0	0	0	0	0	0	0	0	0	0	0	0	0	0	0	0	0	0	0	0	0	0	0	0	0	0	0
PB.17446.11	Rbm25	Rbm25-S-11	NIC	1.86468	0	0	0	0	2.58199	0	0	0	0	0	0	2.04338	2.13636	0	0	0	2.01354	0	0	0	0	0	0	0	0	0	0	0	0	0	0	0	0	0	0	0	0	0	0	0	0	0	0	0	0
PB.7000.11	Pcbd1	Pcbd1-S-11	NNC	1.86468	0	2.11911	0	0	1.96174	0	2.055	0	0	0	0	2.04338	0	1.64244	2.27886	0	2.01354	0	2.84395	0	0	0	0	0	0	0	0	0	0	0	0	0	0	0	0	0	0	0	0	0	0	0	0	0	0
PB.59371.23	Tctn2	Tctn2-S-23	ISM	1.86468	0	0	2.16213	0	1.96174	2.09948	0	0	0	0	0	0	0	0	0	0	0	0	0	0	0	0	0	0	3.37154	0	0	0	0	0	0	0	0	0	0	0	0	0	0	0	0	0	0	0	0
PB.11706.2	2410006H16Rik	2410006H16Rik-S-2	NNC	0	0	2.11911	2.16213	0	1.96174	0	2.055	0	0	0	0	2.04338	0	0	1.6832	0	0	0	0	0	0	0	0	0	0	0	0	0	0	0	0	0	0	0	0	0	0	0	0	0	0	0	0	0	0
PB.72530.37	Orc6	Orc6-S-37	ISM	0	0	0	0	0	0	0	0	0	0	1.99726	2.41757	2.04338	2.76866	0	2.27886	0	0	0	0	0	0	0	0	3.79966	0	0	0	0	0	0	0	0	0	0	0	0	0	0	0	0	0	0	0	0	0
PB.25715.19	Golph3	Golph3-S-19	FSM	0	0	0	0	0	0	0	2.055	0	0	0	1.80981	2.04338	2.13636	0	0	1.57395	0	0	0	0	0	0	0	0	2.71216	0	0	0	0	0	0	0	0	0	3.47019	0	0	3.11123	0	0	0	0	0	0	0
PB.18355.221	Hsp90aa1	Hsp90aa1-S-221	ISM	1.86468	2.04954	2.11911	0	2.2995	0	0	0	0	0	0	0	2.04338	0	1.64244	2.27886	0	0	0	0	0	0	0	0	0	0	0	0	0	0	0	0	0	0	0	0	0	0	0	0	0	0	0	0	0	0
PB.25506.7	Rictor	Rictor-S-7	FSM	0	0	0	0	0	0	0	0	0	0	0	0	0	0	0	0	0	0	0	0	0	0	0	0	0	0	0	0	0	0	0	0	0	0	0	0	0	0	0	0	0	0	0	0	0	0
PB.20204.114	Spin1	Spin1-S-114	ISM	0	2.04954	0	2.16213	0	1.96174	0	0	0	0	2.62014	2.79287	0	2.13636	0	2.91945	2.15772	0	0	0	2.99065	0	0	0	3.79966	3.7655	0	3.93241	0	0	0	0	0	0	0	0	0	0	0	0	0	0	0	0	0	0
PB.958.25	Eif5b	Eif5b-S-25	ISM	0	0	0	0	2.2995	0	0	0	0	0	2.62014	1.80981	0	2.13636	1.64244	1.6832	0	2.01354	0	0	0	0	0	0	0	0	0	0	0	0	0	0	0	0	0	0	0	0	0	0	0	0	0	0	0	0
PB.36181.97	Prelid2	Prelid2-S-97	NNC	0	0	0	2.16213	0	0	0	0	0	0	0	0	0	0	0	1.6832	0	0	0	0	0	0	0	0	0	0	0	0	0	0	0	0	3.10739	0	3.13018	0	0	0	0	2.95272	0	0	0	0	0	0
PB.62157.22	Tax1bp1	Tax1bp1-S-22	ISM	0	2.04954	0	0	0	0	0	0	0	0	2.62014	0	2.04338	2.13636	2.87192	2.27886	0	2.01354	2.54223	0	0	0	0	0	0	0	0	0	0	0	0	0	0	0	0	0	0	0	0	0	0	0	0	0	0	0
PB.8043.14	1500009L16Rik	1500009L16Rik-S-14	NIC	0	0	0	0	0	0	0	0	0	0	0	0	0	0	0	0	0	0	0	0	0	0	0	0	0	0	0	0	0	0	0	0	0	0	0	0	0	0	0	0	0	0	0	0	0	0
PB.63353.20	Kbtbd8	Kbtbd8-S-20	ISM	1.86468	3.55023	0	0	2.2995	0	0	0	0	0	0	0	3.05164	0	1.64244	1.6832	0	2.01354	0	0	0	0	0	0	0	0	2.80904	0	0	0	0	0	0	0	0	0	0	0	0	0	0	0	0	0	0	0
PB.43746.58	Blvra	Blvra-S-58	NNC	0	0	2.11911	0	0	0	2.72941	3.06435	0	2.1791	0	1.80981	0	2.76866	0	0	1.57395	2.01354	0	0	0	0	0	0	0	2.71216	0	0	0	0	0	0	0	0	0	0	0	0	0	0	0	0	0	0	0	0
PB.72485.21	Gcdh	Gcdh-S-21	ISM	0	0	0	0	0	0	0	0	0	0	0	0	0	0	0	0	0	0	0	0	0	0	2.97402	0	0	0	0	0	0	0	0	0	0	0	0	0	0	0	0	0	0	4.12752	0	0	0	0
PB.35626.60	Slc39a6	Slc39a6-S-60	ISM	0	2.67612	0	0	0	2.58199	0	0	2.19357	0	1.99726	3.06512	2.66954	2.13636	2.60293	2.91945	0	0	0	0	0	0	0	0	0	0	0	2.87225	0	0	0	0	0	0	0	0	0	0	0	0	0	0	0	0	0	0
PB.40802.109	Surf4	Surf4-S-109	FSM	0	0	0	0	0	0	0	0	0	0	0	1.80981	0	2.13636	0	1.6832	0	0	0	2.84395	0	0	0	0	0	0	0	0	0	0	3.01019	0	0	0	0	0	0	0	0	0	0	0	0	0	0	0
PB.21810.37	Smn1	Smn1-S-37	ISM	1.86468	2.04954	2.11911	0	3.3289	1.96174	0	0	0	0	2.62014	2.79287	3.32743	2.76866	2.23382	1.6832	0	2.01354	0	0	0	0	0	0	0	0	0	0	0	0	0	0	0	0	0	0	0	0	0	0	0	0	0	0	0	0
PB.25698.12	Zfr	Zfr-S-12	ISM	0	0	0	0	0	0	0	0	0	0	1.99726	1.80981	0	0	0	0	1.57395	0	0	0	0	0	3.64129	0	0	0	0	0	0	0	0	0	0	0	0	0	3.78336	0	0	0	0	0	0	0	0	0
PB.53494.1	Clspn	Clspn-S-1	ISM	3.12744	4.12518	3.80538	2.16213	3.60758	1.96174	2.09948	2.055	3.21493	0	3.49177	3.84979	4.40183	3.82454	3.08368	4.38065	2.15772	3.29432	3.41016	0	0	0	0	0	0	0	2.80904	0	0	0	0	0	0	0	0	0	0	0	0	0	0	0	0	0	0	0
PB.35826.3	Pkd2l2	Pkd2l2-S-3	NIC	3.12744	3.33425	3.41098	2.16213	2.94119	3.23659	2.09948	2.68196	3.49252	2.1791	3.27621	3.60454	3.32743	4.50671	4.2746	4.32423	2.15772	3.29432	3.41016	0	0	0	0	3.04884	2.74483	0	0	0	0	0	0	0	0	0	0	0	0	0	0	0	0	0	0	0	0	0
PB.7960.66	Zfp873	Zfp873-S-66	FSM	4.01708	3.87847	4.2034	4.13543	4.15551	4.22287	3.93443	3.73388	4.03901	4.15429	3.81951	3.84979	4.00247	3.82454	3.75367	3.58524	3.99929	4.08443	3.58696	2.84395	0	4.1166	4.03797	4.61961	2.74483	0	0	2.87225	0	0	0	0	3.10739	3.24901	0	0	0	0	0	0	0	0	3.6987	0	0	0
PB.46136.83	Tpd52	Tpd52-S-83	ISM	1.86468	2.04954	0	0	0	1.96174	0	3.06435	2.19357	2.1791	1.99726	0	2.04338	2.13636	1.64244	2.6496	0	0	2.54223	0	2.99065	0	2.97402	0	0	0	3.86665	0	0	0	0	0	0	0	3.13018	0	0	0	0	0	0	0	0	0	0	0
PB.55792.147	Phtf2	Phtf2-S-147	ISM	0	0	2.11911	2.16213	0	0	0	0	0	0	0	0	0	2.76866	0	3.13174	0	0	0	0	0	0	0	0	0	0	0	2.87225	0	0	0	0	0	0	0	0	0	0	0	0	0	0	0	0	0	0
PB.353.112	Ube2w	Ube2w-S-112	ISM	0	0	2.75031	0	0	0	0	0	0	0	1.99726	2.41757	2.04338	2.13636	2.60293	2.91945	0	2.63759	0	0	0	0	0	0	0	0	0	0	0	0	0	0	0	0	0	0	0	0	0	0	0	0	0	0	0	0
PB.22119.250	Gpbp1	Gpbp1-S-250	ISM	0	2.04954	0	0	0	0	0	0	0	0	0	1.80981	2.04338	0	0	0	0	0	0	0	0	0	0	3.04884	2.74483	0	0	0	0	0	0	0	0	0	0	0	0	0	0	0	0	0	0	0	0	0
PB.78445.1	Xylb	Xylb-S-1	FSM	0	0	0	0	0	0	0	0	0	0	0	0	0	0	0	0	0	0	0	0	0	0	0	0	0	0	0	0	0	0	3.01019	5.0804	3.10739	0	3.80123	4.14766	3.78336	2.96822	0	0	0	0	3.6987	0	0	0
PB.67472.2	Tjp1	Tjp1-S-2	ISM	0	0	0	0	0	0	2.09948	0	0	0	0	1.80981	0	2.13636	1.64244	0	1.57395	2.01354	0	0	0	0	0	0	0	0	0	0	0	0	0	0	0	0	0	0	0	0	0	0	0	0	0	0	0	0
PB.77268.25	Mthfs	Mthfs-S-25	FSM	0	2.67612	0	2.16213	0	0	0	0	0	0	0	0	0	0	0	0	0	0	0	0	0	0	0	0	3.40532	0	0	0	0	0	0	0	0	0	0	0	0	0	0	0	0	0	0	0	0	0
PB.54714.38	Oog2	Oog2-S-38	FSM	0	2.04954	0	0	0	1.96174	0	0	0	0	0	1.80981	2.66954	0	2.87192	0	0	0	0	3.50757	2.99065	0	3.64129	0	3.79966	3.37154	0	0	3.94143	0	0	0	0	0	3.13018	0	0	0	0	0	0	0	0	0	0	0
PB.63822.19	Tmem72	Tmem72-S-19	FSM	0	0	2.11911	0	0	0	0	0	0	0	3.00104	0	0	2.76866	2.60293	2.6496	0	2.01354	0	0	0	0	0	0	0	0	0	0	0	0	0	0	0	0	0	0	0	0	0	0	0	0	0	0	0	0
PB.53376.107	Cdca8	Cdca8-S-107	FSM	0	2.04954	2.11911	2.16213	0	0	0	0	2.19357	2.1791	3.00104	2.41757	2.66954	2.13636	0	2.27886	0	2.01354	0	0	0	0	0	0	0	0	0	0	0	0	0	0	0	0	0	0	0	0	0	0	0	0	0	0	0	0
PB.49933.502	Nexn	Nexn-S-502	ISM	3.91372	4.3229	3.95635	3.45816	4.28708	2.58199	2.72941	2.68196	3.21493	2.81401	4.16958	4.13214	4.40183	4.4207	4.38436	4.57904	2.15772	4.71246	4.61034	2.84395	0	0	2.97402	0	4.08173	2.71216	0	0	0	0	0	3.31925	0	0	0	0	0	0	0	0	0	0	0	0	0	0
PB.2368.7	Psmd1	Psmd1-S-7	ISM	2.47719	3.05837	2.11911	0	2.2995	2.58199	0	2.68196	0	0	3.00104	2.79287	2.66954	2.76866	3.25834	3.98142	2.15772	3.29432	3.41016	0	0	0	0	0	0	0	0	2.87225	0	0	0	0	0	0	0	0	0	0	0	0	0	0	0	0	0	0
PB.52872.128	Mknk1	Mknk1-S-128	NNC	1.86468	2.04954	0	0	0	0	2.09948	0	2.19357	2.1791	0	0	0	0	0	0	1.57395	0	0	0	0	0	0	0	0	0	0	0	0	0	0	0	0	0	0	0	0	0	0	0	0	0	0	0	0	0
PB.60064.1	6330418K02Rik	6330418K02Rik-S-1	FSM	0	0	0	0	0	0	0	0	0	0	0	0	0	0	0	0	0	0	0	0	0	0	0	0	0	0	0	0	0	0	0	0	0	0	0	0	0	0	3.11123	0	0	0	0	0	0	0
PB.26312.48	Atp6v1c1	Atp6v1c1-S-48	ISM	0	0	2.11911	0	0	0	0	0	0	0	3.00104	0	2.04338	2.13636	0	1.6832	0	0	0	0	2.99065	0	0	0	0	0	0	0	0	0	0	0	0	0	0	0	0	0	0	0	0	0	0	0	0	0
PB.21014.1	Gm48419	Gm48419-S-1	FSM	0	0	0	2.16213	2.2995	0	2.09948	2.055	2.19357	2.1791	0	0	0	0	0	0	1.57395	0	0	0	0	0	2.97402	3.04884	0	3.37154	4.14909	0	0	0	3.01019	4.39345	4.17573	4.60576	5.28777	3.47019	4.46507	4.53568	5.46779	4.70001	6.06336	6.31031	5.28814	6.06598	5.28679	5.554
PB.30650.89	E330017A01Rik	E330017A01Rik-S-89	FSM	0	0	2.11911	0	2.2995	0	0	0	0	2.1791	2.62014	1.80981	0	0	2.60293	3.13174	1.57395	0	1.92483	0	0	0	0	0	0	0	0	2.87225	0	0	0	0	0	0	0	0	0	0	0	0	0	0	0	0	0	0
PB.32710.54	Tbc1d22b	Tbc1d22b-S-54	ISM	0	0	2.11911	0	0	0	2.72941	2.055	0	2.1791	0	0	0	0	0	0	0	0	0	0	0	0	0	0	0	0	0	0	0	0	0	0	0	0	0	3.47019	0	0	0	0	0	0	0	0	0	0
PB.47502.31	Trim59	Trim59-S-31	FSM	0	0	0	0	0	0	0	0	0	0	0	1.80981	0	0	1.64244	0	0	0	0	2.84395	0	0	2.97402	3.04884	0	0	2.80904	0	0	0	0	0	0	0	0	0	0	0	0	0	0	0	0	0	0	0
PB.6927.78	Micu1	Micu1-S-78	ISM	0	0	0	0	0	0	0	0	0	0	0	0	0	0	0	0	0	0	0	0	0	0	0	0	0	0	0	0	0	0	3.01019	0	3.77792	0	0	3.47019	0	0	0	2.95272	0	0	0	0	0	0
PB.21680.37	Nsa2	Nsa2-S-37	ISM	1.86468	2.67612	3.41098	2.79601	2.94119	0	0	0	0	0	1.99726	2.79287	3.05164	2.76866	2.60293	2.6496	1.57395	3.01892	1.92483	0	2.99065	0	0	0	0	0	0	0	0	0	0	0	0	0	0	0	0	0	0	0	0	0	0	0	0	0
PB.31546.113	Tulp4	Tulp4-S-113	NNC	0	0	0	0	0	0	0	0	0	0	0	0	2.04338	0	0	0	0	0	1.92483	0	0	4.1166	0	0	0	0	0	2.87225	0	0	0	3.31925	3.77792	0	0	0	0	0	0	0	0	0	0	0	0	0
PB.40635.82	Ehmt1	Ehmt1-S-82	ISM	0	0	0	0	0	0	0	0	0	0	0	0	0	0	0	0	1.57395	0	0	0	0	0	0	0	0	0	0	0	0	0	0	0	3.10739	3.24901	0	0	3.11271	0	0	0	0	0	0	0	0	0
PB.39724.31	Smndc1	Smndc1-S-31	ISM	0	0	0	0	0	0	0	0	0	0	0	0	0	0	1.64244	0	0	0	0	0	0	0	0	0	0	0	0	0	0	0	3.01019	0	0	0	0	0	0	0	0	0	0	0	0	0	0	0
PB.63973.35	Cecr2	Cecr2-S-35	ISM	2.47719	3.05837	2.75031	0	2.2995	0	0	0	2.19357	0	1.99726	1.80981	3.05164	3.64657	3.08368	3.69994	2.52389	3.29432	3.41016	0	2.99065	0	0	0	0	0	0	0	0	0	0	0	0	0	0	0	0	0	0	0	0	0	0	0	0	0
PB.54132.127	Syf2	Syf2-S-127	ISM	0	2.04954	2.11911	0	2.2995	0	2.09948	0	0	0	1.99726	3.27889	2.04338	2.13636	2.23382	2.27886	1.57395	0	0	0	0	0	0	0	2.74483	0	0	0	0	0	0	0	0	0	0	0	0	0	0	0	0	0	0	0	0	0
PB.53867.8	Dnajc8	Dnajc8-S-8	ISM	1.86468	3.33425	3.95635	3.18091	2.2995	1.96174	0	2.055	0	0	3.00104	3.06512	4.00247	4.10675	3.08368	4.43406	0	2.63759	2.54223	0	0	0	0	3.04884	3.79966	0	0	0	0	0	0	0	0	0	0	0	0	0	0	0	0	0	0	0	0	0
PB.12244.2	Mettl16	Mettl16-S-2	ISM	0	0	0	0	0	0	0	0	0	0	0	1.80981	0	0	0	1.6832	0	0	0	2.84395	0	0	0	0	0	0	0	0	0	0	0	0	0	0	0	0	0	2.96822	0	0	0	4.12752	0	0	0	0
PB.34857.1	Ttc7	Ttc7-S-1	FSM	1.86468	2.67612	3.13424	3.18091	2.94119	1.96174	3.38938	3.34029	2.19357	2.1791	0	1.80981	3.54337	0	1.64244	1.6832	0	3.01892	2.54223	0	0	0	0	0	0	2.71216	0	0	0	0	0	0	0	0	0	4.14766	0	0	0	0	0	0	0	0	0	0
PB.42950.91	Ehf	Ehf-S-91	NIC	1.86468	0	0	0	0	0	0	0	0	0	0	0	3.05164	2.13636	0	0	1.57395	0	0	0	0	0	0	0	0	0	0	2.87225	0	0	0	0	0	0	0	0	0	0	0	0	0	0	0	0	0	0
PB.54134.16	Tmem50a	Tmem50a-S-16	ISM	0	0	0	0	0	0	0	0	0	0	0	0	0	0	0	0	0	0	0	0	0	0	0	0	0	0	0	0	0	0	3.01019	0	0	0	3.13018	0	0	0	0	0	0	0	0	0	0	0
PB.17243.3	Eif2s1	Eif2s1-S-3	ISM	1.86468	0	2.11911	0	2.2995	0	0	0	0	0	1.99726	0	0	0	1.64244	0	0	0	0	0	0	0	0	0	0	0	0	0	0	0	0	0	0	0	0	0	0	0	0	0	0	0	0	0	0	0
PB.19405.125	Gmnn	Gmnn-S-125	ISM	0	2.04954	2.11911	0	2.94119	0	0	0	0	0	2.62014	0	2.04338	2.76866	1.64244	2.6496	0	0	0	0	0	0	0	0	2.74483	0	0	0	0	0	0	0	0	0	0	0	0	0	0	0	0	0	0	0	0	0
PB.22845.36	E330034G19Rik	E330034G19Rik-S-36	FSM	2.47719	3.05837	0	0	3.3289	3.23659	0	0	0	0	3.27621	3.06512	4.00247	2.13636	2.60293	2.91945	0	0	1.92483	0	0	0	0	0	0	0	0	2.87225	0	0	0	0	0	0	0	0	0	0	0	0	0	0	0	0	0	0
PB.24515.81	Fndc3a	Fndc3a-S-81	ISM	2.47719	2.67612	2.11911	2.79601	3.3289	2.58199	0	0	0	0	1.99726	3.95302	0	3.97556	1.64244	3.98142	0	3.01892	1.92483	0	0	0	0	0	0	0	0	0	0	0	0	0	0	0	0	0	0	0	0	0	0	0	0	0	0	0
PB.62242.76	Ggct	Ggct-S-76	FSM	3.12744	3.55023	3.13424	0	2.94119	2.58199	0	2.055	0	0	3.49177	2.41757	4.11822	3.42993	0	2.6496	1.57395	0	0	0	0	0	0	0	2.74483	0	0	0	0	0	0	0	0	0	0	0	0	0	0	0	0	0	0	0	0	0
PB.26711.6	Nsmce2	Nsmce2-S-6	ISM	0	0	0	2.16213	0	0	0	0	0	0	0	0	0	2.13636	2.23382	0	0	0	0	0	0	0	0	0	0	0	0	0	0	0	4.5794	3.31925	4.68039	3.24901	3.80123	4.14766	3.78336	2.96822	4.68438	4.01592	4.56739	4.12752	0	0	0	0
PB.59286.129	Rsrc2	Rsrc2-S-129	ISM	0	2.67612	0	0	0	0	0	2.055	0	0	0	0	2.04338	0	0	2.27886	0	0	0	0	0	0	0	0	0	0	0	2.87225	0	0	0	0	0	0	0	0	0	0	0	0	0	0	0	0	0	0
PB.31173.15	Gm41492	Gm41492-S-15	NNC	0	0	0	2.16213	0	1.96174	0	2.055	0	0	1.99726	2.79287	0	2.13636	2.23382	2.27886	0	0	1.92483	2.84395	0	0	0	3.04884	3.40532	2.71216	3.4716	2.87225	0	0	0	0	0	0	0	0	0	0	0	0	0	0	0	0	0	0
PB.72221.108	Arhgap10	Arhgap10-S-108	ISM	2.47719	2.04954	0	0	0	0	0	0	0	0	1.99726	1.80981	2.04338	3.15298	0	1.6832	0	0	1.92483	0	0	0	0	0	0	0	0	0	0	0	0	0	0	0	0	0	0	0	0	0	0	0	0	0	0	0
PB.24476.71	Npm2	Npm2-S-71	ISM	0	0	0	0	0	2.58199	0	0	0	0	1.99726	2.79287	3.54337	2.76866	2.60293	3.30676	0	0	0	2.84395	3.65835	0	3.64129	3.04884	4.30149	0	2.80904	2.87225	3.94143	0	3.01019	0	0	0	0	0	0	0	0	0	0	0	0	0	0	0
PB.82093.73	Zrsr2	Zrsr2-S-73	ISM	3.66809	4.22892	3.6275	2.79601	3.82529	3.45185	2.09948	2.055	3.21493	2.1791	3.81951	3.95302	4.40183	4.65928	3.75367	4.06003	2.79133	3.96874	3.19524	0	0	0	0	0	0	0	0	0	0	0	0	0	0	0	0	0	0	0	0	0	0	0	0	0	0	0
PB.1500.103	Orc2	Orc2-S-103	ISM	0	0	0	0	0	0	0	2.055	0	2.81401	0	1.80981	2.04338	2.13636	1.64244	1.6832	0	2.01354	0	0	0	0	0	0	0	0	0	0	0	0	0	0	0	0	0	0	0	0	0	0	0	0	0	0	0	0
PB.80264.72	Taz	Taz-S-72	ISM	2.47719	0	0	2.16213	0	0	2.09948	0	0	0	0	0	0	0	1.64244	0	2.15772	2.01354	0	0	0	3.43962	2.97402	0	2.74483	0	0	0	0	0	0	0	0	0	0	0	0	0	0	0	0	0	0	0	0	0
PB.66057.14	Nlrp9a	Nlrp9a-S-14	ISM	0	0	0	0	0	0	0	2.055	0	0	0	0	0	0	0	0	0	0	1.92483	2.84395	0	0	0	3.71799	3.40532	3.37154	0	0	0	0	0	0	0	0	0	0	0	0	0	0	0	0	0	0	0	0
PB.28982.272	Rsl1d1	Rsl1d1-S-272	FSM	0	2.04954	2.11911	0	0	1.96174	0	0	0	0	0	2.41757	0	3.42993	2.23382	2.91945	0	2.01354	0	0	0	0	0	0	0	0	0	0	0	0	0	0	0	0	0	0	0	0	0	0	0	0	0	0	0	0
PB.68971.53	Rps15a	Rps15a-S-53	ISM	0	0	0	0	0	0	0	0	0	0	0	0	0	0	1.64244	0	0	0	0	0	0	0	0	0	0	0	0	0	0	0	0	0	0	0	0	0	0	0	0	0	0	0	0	0	0	0
PB.15648.1	5730507C01Rik	5730507C01Rik-S-1	FSM	3.51819	0	0	0	0	0	0	2.68196	2.19357	3.47672	0	0	0	2.76866	1.64244	0	3.00213	2.01354	1.92483	0	0	0	0	0	0	0	0	0	0	0	0	0	0	0	0	0	0	0	0	0	0	0	0	0	0	0
PB.3756.20	Aspm	Aspm-S-20	FSM	2.47719	3.05837	2.75031	2.16213	0	1.96174	0	0	0	0	3.00104	3.45491	2.66954	2.13636	1.64244	2.6496	0	0	0	0	0	0	0	0	0	0	0	0	0	0	0	0	0	0	0	0	0	0	0	0	0	0	0	0	0	0
PB.8445.6	Gm47708	Gm47708-S-6	FSM	0	0	0	0	0	0	2.09948	0	0	0	0	0	0	0	0	2.27886	0	0	0	0	0	0	0	0	0	0	0	0	0	0	0	0	0	0	0	0	0	0	0	0	0	0	0	0	0	0
PB.36022.18	Ik	Ik-S-18	ISM	0	0	2.11911	2.16213	0	0	0	0	0	0	2.62014	1.80981	2.04338	3.42993	0	2.27886	0	0	1.92483	0	0	0	0	0	0	0	0	0	0	0	0	0	0	0	0	0	0	0	0	0	0	0	0	0	0	0
PB.32952.7	Zfp955b	Zfp955b-S-7	FSM	0	2.67612	2.11911	0	2.2995	0	0	0	0	0	0	1.80981	2.04338	2.13636	0	0	0	2.01354	0	0	0	0	0	0	0	0	0	0	0	0	0	0	0	0	0	0	0	0	0	0	0	0	0	0	0	0
PB.53264.80	Pabpc4	Pabpc4-S-80	NIC	2.47719	2.04954	0	2.16213	2.2995	1.96174	0	0	0	0	2.62014	2.41757	2.66954	2.76866	1.64244	0	1.57395	3.01892	2.54223	0	0	0	0	0	3.40532	0	0	0	0	0	0	0	0	0	0	0	0	0	0	0	0	0	0	0	0	0
PB.77248.16	Mthfsl	Mthfsl-S-16	FSM	0	0	0	0	2.94119	1.96174	2.09948	0	0	0	1.99726	1.80981	0	0	0	0	0	2.01354	0	0	0	0	0	0	2.74483	0	0	2.87225	0	0	0	0	0	0	0	0	0	0	0	0	0	0	0	0	0	0
PB.27279.33	Triobp	Triobp-S-33	FSM	0	0	0	0	0	0	0	0	0	2.1791	1.99726	0	0	0	1.64244	1.6832	2.15772	0	0	0	0	0	0	0	0	0	0	0	0	0	0	0	0	0	0	0	0	0	0	0	0	0	0	0	0	0
PB.79491.5	Nkap	Nkap-S-5	ISM	0	2.67612	2.75031	0	2.2995	1.96174	2.09948	2.055	0	0	0	2.41757	2.04338	2.13636	3.08368	2.27886	1.57395	0	0	0	0	0	0	0	0	0	0	0	0	0	0	0	0	0	0	0	0	0	0	0	0	0	0	0	0	0
PB.43301.10	Bub1b	Bub1b-S-10	ISM	0	2.67612	0	0	0	2.58199	0	0	0	0	1.99726	2.41757	0	2.13636	0	2.27886	2.15772	0	1.92483	0	0	0	0	0	0	0	0	0	0	0	0	0	0	0	0	0	0	0	0	0	0	0	0	0	0	0
PB.76529.61	Usp3	Usp3-S-61	ISM	1.86468	2.67612	3.13424	2.16213	3.3289	2.58199	0	0	0	0	3.00104	2.79287	3.54337	2.76866	3.25834	3.13174	0	2.63759	1.92483	2.84395	2.99065	0	0	0	0	2.71216	0	0	0	0	0	0	0	0	0	0	0	0	0	0	0	0	0	0	0	0
PB.9462.9	Baz2a	Baz2a-S-9	NNC	0	0	0	0	0	1.96174	0	0	0	0	1.99726	2.79287	2.04338	2.13636	0	1.6832	0	0	1.92483	0	0	0	0	3.04884	0	0	0	0	3.94143	0	0	0	0	0	0	0	0	0	0	0	0	0	0	0	0	0
PB.50985.134	Dcaf12	Dcaf12-S-134	ISM	0	0	0	0	0	0	0	0	0	2.1791	1.99726	0	2.04338	0	0	1.6832	0	0	0	0	0	0	3.64129	3.04884	0	0	0	0	0	0	3.67839	3.31925	0	3.92256	4.19922	4.83288	4.18122	0	0	0	0	0	0	0	0	0
PB.35636.81	Tpgs2	Tpgs2-S-81	NNC	0	0	0	0	0	0	0	0	0	0	0	1.80981	2.04338	2.13636	2.23382	0	0	0	0	0	2.99065	3.43962	0	0	0	0	2.80904	2.87225	0	0	0	0	0	0	0	0	0	0	0	0	0	0	0	0	0	0
PB.12445.47	Nsrp1	Nsrp1-S-47	ISM	0	2.04954	2.75031	2.16213	3.82529	0	0	0	0	0	1.99726	0	2.04338	2.76866	2.23382	2.91945	0	0	0	0	0	0	2.97402	0	0	0	0	0	0	0	0	0	0	0	3.13018	0	0	0	0	0	0	0	0	0	0	0
PB.35278.52	Esco1	Esco1-S-52	ISM	0	0	0	0	0	0	0	0	0	0	0	0	2.04338	0	1.64244	1.6832	0	2.01354	0	0	0	0	0	0	0	0	0	0	0	0	0	0	3.10739	3.24901	0	3.47019	0	0	0	0	0	0	0	0	0	0
PB.12620.91	Nlk	Nlk-S-91	NNC	0	0	0	0	0	0	0	0	0	0	0	0	0	0	0	0	0	0	0	0	0	0	0	0	0	0	0	0	0	0	0	0	0	0	0	3.47019	3.11271	0	0	0	0	0	0	0	0	0
PB.23396.1	Gm21154	Gm21154-S-1	NNC	0	0	0	0	0	0	0	0	0	0	0	0	0	0	2.23382	1.6832	2.15772	2.01354	1.92483	2.84395	0	0	0	0	0	0	0	0	0	0	0	0	0	0	0	0	0	0	0	0	0	0	0	0	0	0
PB.62157.6	Tax1bp1	Tax1bp1-S-6	NNC	0	2.67612	0	0	0	0	0	0	0	0	2.62014	1.80981	2.04338	0	0	1.6832	0	0	0	0	0	0	0	0	0	0	0	0	0	0	0	0	0	0	0	0	0	0	0	0	0	0	0	0	0	0
PB.33938.8	Rpl36	Rpl36-S-8	ISM	0	0	0	0	0	0	0	0	0	0	0	0	0	0	0	0	1.57395	0	0	0	0	0	0	0	0	0	0	0	0	0	0	3.31925	0	0	0	3.47019	0	0	0	0	0	0	0	0	0	0
PB.54498.75	Padi6	Padi6-S-75	ISM	3.51819	3.33425	2.11911	0	2.2995	1.96174	0	2.055	0	0	2.62014	2.79287	0	4.2227	2.23382	3.30676	0	2.01354	0	0	0	0	0	0	0	0	0	0	0	0	0	0	0	0	0	0	0	0	0	0	0	0	0	0	0	0
PB.480.3	Khdc1a	Khdc1a-S-3	FSM	0	0	0	0	0	0	0	0	0	0	0	2.41757	0	0	1.64244	0	0	0	0	0	0	0	0	3.04884	2.74483	0	0	2.87225	3.94143	0	0	3.31925	0	0	0	4.14766	0	0	0	2.95272	0	4.12752	0	0	0	0
PB.15348.137	Ubxn2a	Ubxn2a-S-137	FSM	0	2.04954	0	0	0	0	0	0	2.19357	0	0	0	0	0	0	0	1.57395	0	0	0	0	0	2.97402	0	0	0	0	0	0	0	0	0	0	0	3.13018	0	0	0	0	0	0	0	0	0	0	0
PB.12445.28	Nsrp1	Nsrp1-S-28	FSM	4.11075	4.75353	4.77221	3.85307	4.60177	4.653	3.38938	2.68196	3.49252	0	5.18921	4.85773	5.20592	4.72764	4.73206	5.67079	3.32431	5.13423	4.77136	0	3.65835	0	2.97402	0	0	0	2.80904	0	0	0	0	0	0	0	0	0	0	0	0	2.95272	0	0	0	0	0	0
PB.75373.9	Hspa8	Hspa8-S-9	ISM	0	0	2.11911	0	0	0	0	0	0	0	0	2.41757	2.04338	0	0	2.6496	1.57395	2.01354	0	0	0	0	0	0	0	0	0	0	0	0	0	0	0	0	0	0	0	0	0	0	0	0	0	0	0	0
PB.32117.61	Tnfrsf12a	Tnfrsf12a-S-61	FSM	0	0	0	0	0	0	0	0	0	0	0	0	2.04338	0	0	0	2.15772	0	0	0	0	0	0	0	0	0	0	0	0	0	4.5794	0	3.77792	4.8269	4.48314	4.14766	3.11271	4.53568	4.86516	2.95272	4.56739	0	0	3.88715	0	5.554
PB.55455.2	Akap9	Akap9-S-2	ISM	0	2.04954	0	0	2.2995	0	0	0	0	0	0	2.41757	2.66954	2.13636	2.23382	2.6496	1.57395	0	2.54223	0	0	0	0	0	0	0	0	0	0	0	0	0	0	0	0	0	0	0	0	0	0	0	0	0	0	0
PB.60079.34	A430033K04Rik	A430033K04Rik-S-34	FSM	0	0	0	0	0	0	0	0	0	2.1791	1.99726	1.80981	2.66954	0	0	2.27886	0	0	0	0	0	0	0	0	0	0	0	0	0	0	0	0	0	0	0	0	0	0	0	0	0	0	0	0	0	0
PB.3247.8	Rab3gap1	Rab3gap1-S-8	ISM	0	0	2.11911	0	0	0	0	0	0	0	1.99726	0	2.66954	0	1.64244	2.27886	1.57395	0	1.92483	0	0	0	0	0	0	0	0	0	0	0	0	0	0	0	0	0	0	0	0	0	0	0	0	0	0	0
PB.32852.11	U2af1	U2af1-S-11	NNC	2.47719	0	0	2.16213	2.2995	0	0	0	0	0	0	0	0	0	0	2.27886	2.15772	2.63759	1.92483	0	0	0	0	0	0	0	2.80904	0	0	0	0	0	0	0	0	0	0	0	3.11123	0	0	0	0	0	0	0
PB.68853.135	Btbd10	Btbd10-S-135	ISM	1.86468	0	2.11911	0	0	0	0	0	0	0	3.00104	0	0	2.13636	0	0	0	0	0	0	0	0	0	0	2.74483	0	0	0	0	0	0	0	0	0	0	0	0	0	0	0	0	0	0	0	0	0
PB.43308.18	Knstrn	Knstrn-S-18	ISM	1.86468	2.04954	3.13424	0	3.3289	0	0	0	0	0	1.99726	0	2.04338	2.13636	2.23382	2.27886	0	0	0	0	0	0	0	0	0	0	0	0	0	0	0	0	0	0	0	0	0	0	0	0	0	0	0	0	0	0
PB.36202.2	Rbm27	Rbm27-S-2	ISM	1.86468	2.67612	3.13424	0	0	0	0	0	0	0	0	2.41757	3.05164	2.76866	0	0	0	0	0	0	0	0	0	0	0	0	0	0	0	0	0	0	0	0	0	0	0	0	0	0	0	0	0	0	0	0
PB.45765.1	2210418O10Rik	2210418O10Rik-S-1	FSM	0	0	0	0	0	0	0	0	0	0	0	0	0	0	0	1.6832	0	0	0	0	0	0	0	0	0	0	0	0	0	0	0	0	0	0	0	0	0	0	0	0	0	0	0	0	0	0
PB.81361.15	Sytl4	Sytl4-S-15	ISM	1.86468	0	2.11911	2.16213	0	0	2.09948	2.055	0	2.1791	0	0	2.04338	0	0	2.27886	2.79133	2.63759	0	2.84395	0	0	0	3.04884	0	0	0	2.87225	3.94143	0	0	0	0	0	0	0	0	0	0	0	3.88458	0	0	0	0	0
PB.75772.66	Btg4	Btg4-S-66	ISM	0	0	0	0	2.2995	0	2.09948	0	2.19357	0	2.62014	1.80981	2.66954	2.76866	0	2.27886	0	0	1.92483	0	0	0	0	0	3.40532	0	0	3.5367	0	0	0	0	0	0	0	0	0	0	0	0	0	0	0	0	0	0
PB.30650.30	St3gal6	St3gal6-S-30	FSM	0	0	0	0	0	0	0	0	0	0	1.99726	0	0	0	0	0	0	0	0	0	0	0	0	0	0	0	0	0	0	0	3.01019	0	0	0	0	0	0	0	0	0	0	0	0	0	0	0
PB.69316.38	Hirip3	Hirip3-S-38	ISM	1.86468	0	2.11911	0	0	0	2.09948	0	0	0	0	0	0	0	1.64244	2.27886	0	0	0	0	0	0	0	0	0	0	0	0	0	0	0	0	0	0	0	0	0	0	0	0	0	0	0	0	0	0
PB.58028.11	Sec31a	Sec31a-S-11	ISM	2.47719	0	2.75031	0	2.2995	3.23659	0	2.055	2.19357	2.81401	0	2.41757	3.05164	0	2.87192	2.27886	2.15772	3.01892	2.92112	2.84395	0	0	0	3.04884	0	2.71216	0	2.87225	0	0	0	0	0	0	3.13018	3.47019	0	0	0	0	0	0	0	0	0	0
PB.71752.594	Trim61	Trim61-S-594	FSM	3.12744	3.87847	3.80538	2.16213	4.40333	2.96193	3.11288	2.055	2.19357	0	5.07655	4.13214	5.04653	3.82454	3.93208	4.06003	1.57395	3.01892	1.92483	0	0	3.43962	0	0	3.40532	0	0	0	0	0	0	0	0	0	0	0	0	0	0	0	0	0	0	0	0	0
PB.59027.183	Oas1e	Oas1e-S-183	ISM	0	0	0	2.16213	0	1.96174	0	0	0	0	2.62014	2.79287	2.04338	2.13636	3.40699	2.27886	2.52389	0	1.92483	3.50757	3.65835	0	0	0	3.79966	3.37154	2.80904	0	0	0	0	0	0	0	0	0	0	0	0	0	0	0	0	0	0	0
PB.13872.76	Dnajc7	Dnajc7-S-76	ISM	0	0	2.11911	0	0	0	0	0	0	0	2.62014	0	0	0	0	1.6832	1.57395	2.01354	0	2.84395	0	0	0	0	0	0	0	0	0	0	0	0	0	0	0	0	0	0	0	0	0	0	0	0	0	0
PB.44781.57	Phf20	Phf20-S-57	NIC	3.34178	3.87847	2.75031	2.79601	3.60758	3.62887	2.72941	3.34029	2.19357	2.81401	3.49177	3.95302	4.40183	4.2227	4.21485	4.70564	3.00213	3.68734	3.73715	0	0	0	0	3.04884	3.79966	0	2.80904	2.87225	0	0	0	0	0	0	0	0	0	0	0	0	0	0	0	0	0	0
PB.53783.6	Srsf4	Srsf4-S-6	ISM	1.86468	2.04954	0	0	2.2995	0	0	0	0	0	0	1.80981	2.04338	0	0	0	0	0	0	0	0	0	0	0	0	0	0	0	0	0	0	3.31925	0	0	0	0	0	0	0	0	0	0	0	0	0	0
PB.14747.92	H3f3b	H3f3b-S-92	ISM	0	0	2.11911	0	2.94119	1.96174	0	2.055	0	2.81401	1.99726	1.80981	2.04338	0	0	1.6832	1.57395	0	0	0	0	0	0	0	2.74483	0	0	0	0	0	0	0	0	0	0	0	0	0	0	0	0	0	0	0	0	0
PB.38679.12	Smarca2	Smarca2-S-12	FSM	2.85426	2.67612	3.6275	2.16213	2.94119	1.96174	2.09948	0	2.19357	0	3.49177	3.27889	2.66954	3.42993	3.25834	4.32423	2.15772	3.29432	0	0	0	0	0	3.04884	4.08173	0	0	0	0	0	0	0	0	0	0	0	0	0	0	0	0	0	0	0	0	0
PB.41387.145	Rbm18	Rbm18-S-145	FSM	1.86468	2.04954	0	0	0	0	0	0	2.19357	0	0	1.80981	2.66954	0	2.60293	0	0	0	0	0	0	0	0	0	0	0	0	0	0	0	0	0	0	0	0	0	0	0	0	3.61942	0	0	0	0	0	0
PB.19893.3	Hivep1	Hivep1-S-3	NNC	0	0	0	0	0	0	0	0	0	0	3.27621	1.80981	0	2.13636	1.64244	0	0	0	0	0	0	0	0	0	0	0	2.80904	2.87225	0	0	0	0	0	0	0	0	0	0	0	0	0	0	0	0	0	0
PB.73990.14	Rpl13	Rpl13-S-14	ISM	1.86468	0	0	2.79601	2.94119	0	0	0	2.19357	0	2.62014	0	2.04338	0	0	1.6832	0	0	0	0	0	0	0	0	0	0	0	0	0	0	0	0	0	0	0	0	0	0	0	0	0	0	0	0	0	0
PB.67447.69	Mphosph10	Mphosph10-S-69	ISM	0	2.04954	0	0	0	0	0	2.055	2.19357	0	0	1.80981	2.04338	0	2.23382	0	1.57395	2.63759	0	0	0	0	0	0	0	0	0	0	0	0	0	0	0	0	0	0	0	0	0	0	0	0	0	0	0	0
PB.36028.9	Zmat2	Zmat2-S-9	ISM	1.86468	0	3.41098	0	0	0	0	2.055	0	0	2.62014	0	0	0	0	1.6832	1.57395	2.63759	0	0	0	0	0	0	0	0	0	0	0	0	0	0	0	0	0	0	0	0	0	0	0	0	0	0	0	0
PB.59045.78	Rpl6	Rpl6-S-78	NIC	0	0	0	0	0	2.58199	2.09948	0	0	0	1.99726	1.80981	0	0	2.60293	1.6832	1.57395	0	1.92483	0	0	3.43962	0	0	3.40532	0	0	0	0	4.4043	4.91294	0	0	4.3214	4.48314	3.47019	3.78336	0	5.15091	4.01592	3.88458	0	4.78067	4.97199	4.88385	0
PB.17246.56	Atp6v1d	Atp6v1d-S-56	ISM	3.12744	2.67612	3.41098	2.16213	2.94119	2.96193	0	0	0	0	2.62014	4.04659	3.05164	3.42993	2.60293	4.48476	0	2.01354	2.92112	0	0	0	0	0	0	0	0	0	0	0	0	0	0	0	0	0	0	0	0	0	0	0	0	0	0	0
PB.11690.22	Pigl	Pigl-S-22	ISM	0	0	0	0	0	0	0	0	0	0	0	0	0	0	0	0	0	0	0	2.84395	0	0	0	0	0	0	0	0	0	0	0	0	0	0	0	0	0	0	0	0	0	0	0	0	0	0
PB.78709.820	mt-Nd5	mt-Nd5-S-820	FSM	5.06992	5.55313	5.04213	5.65429	5.5987	5.50317	4.75005	4.75975	5.17206	5.15585	5.94837	5.62366	5.95025	5.10782	5.49195	6.0444	4.84614	4.96825	4.99281	5.83146	5.5081	5.80792	5.75795	5.94732	5.97679	5.28758	5.23713	4.61571	4.62482	6.69582	5.73547	6.11782	5.95461	6.38916	6.1786	6.07994	7.11107	6.88678	6.70447	6.63809	6.06336	5.72398	5.97876	6.1711	6.26446	5.554
PB.50394.116	Otud6b	Otud6b-S-116	ISM	1.86468	0	0	0	2.2995	0	0	2.055	0	0	0	0	0	2.13636	0	1.6832	0	0	0	0	0	0	0	0	0	0	0	0	0	0	0	0	0	0	0	0	0	0	0	0	0	0	0	0	0	0
PB.42088.24	Gorasp2	Gorasp2-S-24	FSM	1.86468	0	0	0	0	0	0	2.055	2.19357	0	0	0	0	2.76866	0	0	0	0	0	0	0	0	0	0	0	2.71216	2.80904	0	0	0	0	0	0	0	0	0	0	0	0	0	0	0	0	0	0	0
PB.75120.3	Nfrkb	Nfrkb-S-3	NIC	2.47719	3.33425	2.75031	2.16213	2.2995	0	2.09948	0	0	0	1.99726	3.06512	3.54337	2.76866	2.87192	4.20083	0	3.01892	1.92483	0	0	0	0	0	0	0	0	0	0	0	0	0	0	0	0	0	0	0	0	0	0	0	0	0	0	0
PB.75772.165	Btg4	Btg4-S-165	FSM	0	0	0	0	0	0	0	0	0	0	0	0	2.04338	0	1.64244	1.6832	0	2.01354	0	0	0	0	2.97402	0	2.74483	2.71216	0	0	0	0	0	0	0	0	0	0	0	0	0	0	0	0	0	0	0	0
PB.10819.24	Slu7	Slu7-S-24	FSM	0	2.04954	0	0	0	0	0	0	0	0	1.99726	0	0	2.76866	1.64244	1.6832	1.57395	2.01354	0	0	0	0	0	0	0	0	0	0	0	0	0	0	0	0	0	0	0	0	0	0	0	0	0	0	0	0
PB.46388.130	Gyg	Gyg-S-130	ISM	0	0	0	0	0	0	0	0	2.19357	0	1.99726	0	0	2.76866	0	1.6832	0	0	0	0	0	0	0	0	0	0	0	0	0	0	0	0	0	0	0	0	0	0	0	0	0	0	0	0	0	0
PB.15475.12	Smc6	Smc6-S-12	ISM	0	2.04954	0	0	2.2995	1.96174	2.09948	0	0	0	0	1.80981	3.05164	2.13636	0	1.6832	0	0	0	0	0	0	0	0	0	0	0	0	0	0	0	0	0	0	0	0	0	0	0	0	0	0	0	0	0	0
PB.39840.244	Ccdc186	Ccdc186-S-244	ISM	0	2.04954	0	0	2.2995	1.96174	0	2.055	0	0	1.99726	3.45491	2.04338	0	2.60293	2.6496	0	3.29432	0	0	0	0	0	0	0	0	0	0	0	0	0	0	0	0	0	0	0	0	0	0	0	0	0	0	0	0
PB.24476.73	Npm2	Npm2-S-73	NNC	0	0	0	0	0	0	0	0	0	0	0	1.80981	0	0	1.64244	0	0	0	1.92483	0	0	3.43962	0	0	2.74483	0	0	0	0	0	0	0	0	0	0	0	0	0	0	0	0	0	0	0	0	0
PB.21844.73	Rad17	Rad17-S-73	ISM	1.86468	2.04954	2.11911	0	0	0	2.09948	0	0	0	1.99726	2.41757	2.66954	2.76866	2.23382	3.13174	0	0	0	0	0	0	0	0	0	0	0	0	0	0	0	0	0	0	0	0	0	0	0	0	0	0	0	0	0	0
PB.50702.3	Casp8ap2	Casp8ap2-S-3	ISM	0	2.04954	2.75031	0	2.2995	1.96174	0	2.055	0	0	2.62014	3.06512	4.00247	3.42993	2.87192	3.13174	1.57395	2.01354	1.92483	0	0	0	0	0	0	0	0	0	0	0	0	0	0	0	0	0	0	0	0	0	0	0	0	0	0	0
PB.41319.3	Hspa5	Hspa5-S-3	ISM	1.86468	2.67612	0	0	2.2995	0	0	0	0	0	2.62014	3.06512	0	0	0	3.30676	0	0	0	0	0	0	0	0	3.40532	0	0	0	0	0	0	0	0	0	0	0	0	0	0	0	0	0	0	0	0	0
PB.55555.1	Abcb1b	Abcb1b-S-1	ISM	0	0	0	0	0	0	0	0	0	0	0	0	0	0	0	0	0	0	0	0	0	0	0	0	0	0	0	0	0	0	0	3.31925	0	3.24901	0	0	0	0	0	0	0	0	0	0	0	0
PB.30577.1	Zbtb11os1	Zbtb11os1-S-1	FSM	0	0	0	0	0	0	0	0	0	0	0	0	0	0	0	0	0	0	0	0	0	0	0	0	0	0	0	0	0	0	0	0	0	0	0	0	0	0	0	0	0	0	0	0	0	0
PB.67310.65	Nipa2	Nipa2-S-65	FSM	0	0	0	0	0	0	0	0	0	0	0	0	0	0	0	0	0	0	0	0	0	0	0	0	0	0	0	0	0	0	0	0	0	0	0	0	0	0	0	2.95272	0	0	0	0	0	0
PB.62157.26	Tax1bp1	Tax1bp1-S-26	ISM	1.86468	2.67612	2.75031	0	0	0	0	0	0	0	2.62014	0	3.32743	0	2.23382	3.45567	0	2.63759	1.92483	0	0	0	0	0	0	0	0	0	0	0	0	0	0	0	0	0	0	0	0	0	0	0	0	0	0	0
PB.14679.26	Atp5h	Atp5h-S-26	FSM	0	0	0	2.16213	0	0	0	0	0	0	0	1.80981	0	0	0	0	0	0	0	0	0	0	0	0	0	0	0	0	0	0	0	0	0	0	0	0	0	0	0	0	0	0	0	0	4.19825	0
PB.49803.2	Znhit6	Znhit6-S-2	ISM	2.47719	2.04954	2.11911	0	0	2.58199	0	0	0	0	0	1.80981	0	2.13636	2.23382	3.13174	0	2.01354	0	0	0	0	0	0	0	0	0	0	0	0	0	0	0	0	0	0	0	0	0	0	0	0	0	0	0	0
PB.69738.38	9430038I01Rik	9430038I01Rik-S-38	ISM	0	0	0	2.16213	0	0	0	2.055	2.19357	0	1.99726	2.41757	0	0	0	0	0	0	0	0	0	0	0	0	0	0	0	0	0	0	0	0	0	0	0	0	0	0	0	0	0	0	0	0	0	0
PB.69285.89	Bola2	Bola2-S-89	FSM	0	0	0	0	0	0	0	0	0	0	0	0	0	0	0	0	0	0	0	0	0	0	0	0	0	0	0	0	0	0	3.01019	0	0	0	0	0	0	0	0	0	0	0	0	0	0	0
PB.31112.80	Tiam1	Tiam1-S-80	NIC	0	2.67612	2.11911	0	0	0	0	0	0	0	0	0	2.66954	0	1.64244	2.6496	0	0	0	0	0	0	2.97402	0	0	0	0	0	0	0	0	0	0	0	0	0	0	0	0	0	0	0	0	0	0	0
PB.16804.19	Gm47432	Gm47432-S-19	FSM	0	0	0	0	0	0	0	0	0	0	0	1.80981	0	0	2.60293	0	0	0	0	4.18562	0	3.43962	0	3.04884	2.74483	3.37154	0	0	0	0	0	0	0	0	0	0	0	0	0	0	0	0	0	0	0	0
PB.26275.125	Rrm2b	Rrm2b-S-125	ISM	2.85426	2.04954	2.11911	0	0	2.58199	0	0	2.19357	2.1791	0	1.80981	3.05164	2.13636	1.64244	3.80283	1.57395	2.63759	0	0	2.99065	0	0	0	0	0	0	0	0	0	0	0	0	0	0	0	0	0	0	0	0	0	0	0	0	0
PB.43024.108	Depdc7	Depdc7-S-108	ISM	0	0	2.11911	0	0	2.58199	0	0	0	0	2.62014	0	0	0	2.87192	2.27886	0	2.01354	0	0	0	0	0	0	0	0	0	0	0	0	0	0	0	0	0	0	0	0	0	0	0	0	0	0	0	0
PB.78307.21	Cmtm7	Cmtm7-S-21	NNC	0	0	0	0	0	0	2.09948	0	0	0	0	0	0	0	0	1.6832	0	0	0	0	0	0	0	0	0	0	0	0	0	0	0	0	0	0	0	0	0	0	0	0	0	0	0	0	0	0
PB.59026.107	Oas1h	Oas1h-S-107	ISM	1.86468	0	0	0	2.2995	0	2.09948	0	2.82934	0	3.00104	1.80981	2.04338	0	3.08368	1.6832	0	0	0	0	0	3.43962	0	3.71799	3.40532	0	0	2.87225	0	0	0	0	0	0	0	0	0	0	0	0	0	0	0	0	0	0
PB.43264.22	Fam98b	Fam98b-S-22	ISM	1.86468	0	2.75031	0	2.94119	1.96174	0	0	0	2.1791	0	1.80981	2.04338	4.10675	0	2.91945	0	2.01354	0	2.84395	0	0	0	0	0	0	0	0	0	0	0	0	0	0	0	0	0	0	0	0	0	0	0	0	0	0
PB.65775.17	Nlrp9b	Nlrp9b-S-17	FSM	0	2.04954	0	0	0	0	0	0	0	0	1.99726	2.41757	0	2.76866	0	2.6496	0	0	0	0	0	0	0	0	0	0	2.80904	0	0	0	0	0	0	0	0	0	0	0	0	0	0	0	0	0	0	0
PB.14210.153	Cdc27	Cdc27-S-153	ISM	0	2.67612	0	2.16213	0	0	2.09948	0	0	0	0	2.41757	2.66954	2.13636	1.64244	2.6496	0	0	0	0	0	0	0	0	0	0	0	0	0	0	0	0	0	0	0	0	0	0	0	0	0	0	0	0	0	0
PB.29688.4	Ccdc50	Ccdc50-S-4	ISM	0	0	0	0	0	1.96174	0	0	0	0	1.99726	1.80981	2.66954	0	0	2.91945	1.57395	2.01354	0	0	0	0	2.97402	0	0	0	0	0	0	0	0	0	0	0	0	0	0	0	0	0	0	0	0	0	0	0
PB.20204.263	Spin1	Spin1-S-263	FSM	0	0	0	0	2.2995	0	0	0	0	0	0	1.80981	0	2.13636	1.64244	0	0	0	0	0	2.99065	0	0	0	0	3.37154	0	0	0	0	0	0	0	0	0	0	0	0	0	0	0	0	0	0	0	0
PB.75349.38	Olfr976	Olfr976-S-38	FSM	0	0	0	0	0	0	0	0	0	0	0	1.80981	2.04338	0	0	0	0	0	0	0	0	0	0	0	0	2.71216	2.80904	3.5367	0	0	0	0	0	0	0	0	0	0	0	0	0	0	0	0	0	0
PB.71474.31	Cdkn2aip	Cdkn2aip-S-31	ISM	0	0	0	0	0	0	0	0	0	0	0	0	2.04338	2.13636	1.64244	1.6832	0	0	1.92483	0	0	0	0	0	0	0	0	0	0	0	0	0	0	0	0	0	0	0	0	0	0	0	0	0	0	0
PB.35826.16	Pkd2l2	Pkd2l2-S-16	NNC	2.85426	2.04954	2.75031	2.16213	2.2995	1.96174	0	2.055	0	2.1791	2.62014	2.41757	3.54337	3.42993	3.65091	4.13291	0	2.63759	2.54223	0	2.99065	0	0	0	2.74483	0	0	0	0	0	0	0	0	0	0	0	0	0	0	0	0	0	0	0	0	0
PB.26698.14	Mtss1	Mtss1-S-14	ISM	2.47719	0	2.11911	0	0	0	0	2.055	0	2.1791	0	0	3.32743	0	0	0	0	0	0	0	0	0	0	0	0	0	0	0	0	0	0	0	0	0	0	0	0	0	0	0	0	0	0	0	0	0
PB.55435.4	Fam133b	Fam133b-S-4	ISM	3.12744	2.67612	3.41098	2.16213	3.3289	3.23659	0	0	2.19357	2.81401	1.99726	3.27889	3.87154	3.42993	3.40699	4.26443	0	3.01892	2.54223	0	0	0	0	0	0	0	0	2.87225	0	0	0	0	0	0	0	0	0	0	0	0	0	0	0	0	0	0
PB.44104.14	AL731706.1	AL731706.1-S-14	FSM	0	0	0	0	2.2995	1.96174	0	0	0	0	0	1.80981	0	2.13636	1.64244	2.27886	1.57395	0	0	2.84395	0	0	0	0	2.74483	0	0	0	0	0	0	3.31925	3.10739	3.24901	0	0	3.11271	4.03197	3.78185	0	0	0	3.6987	0	0	0
PB.14302.110	Ccdc47	Ccdc47-S-110	ISM	0	0	2.11911	0	0	0	2.09948	2.055	0	0	0	0	2.04338	0	1.64244	0	0	0	1.92483	0	0	0	0	0	0	0	0	0	0	4.4043	0	0	0	0	0	0	0	0	0	0	0	0	0	0	0	0
PB.78056.19	Shisa5	Shisa5-S-19	NNC	2.47719	0	2.11911	2.16213	0	0	0	2.055	2.19357	0	1.99726	1.80981	2.04338	0	2.23382	0	2.52389	2.01354	1.92483	0	0	0	0	0	2.74483	2.71216	2.80904	0	0	0	0	0	0	0	0	0	0	0	0	0	0	0	0	0	0	0
PB.21017.2	Gm8016	Gm8016-S-2	FSM	0	0	0	2.16213	0	0	0	0	0	0	0	0	0	0	0	0	0	2.01354	0	0	0	0	0	0	0	0	2.80904	0	0	0	0	0	0	0	0	0	3.11271	2.96822	3.11123	0	0	4.12752	0	0	0	0
PB.4299.6	Cenpl	Cenpl-S-6	FSM	0	0	0	0	0	0	0	2.055	0	0	0	0	0	0	0	0	0	0	0	0	0	0	0	0	0	0	0	0	0	0	3.01019	0	0	3.24901	0	0	0	0	3.11123	0	0	0	0	0	0	0
PB.20297.69	Sptlc1	Sptlc1-S-69	ISM	0	0	2.11911	0	0	0	0	2.055	0	0	0	0	2.04338	0	1.64244	0	0	0	0	0	2.99065	0	0	0	0	0	0	0	0	0	0	0	0	0	0	0	0	0	0	0	0	0	0	0	0	0
PB.24892.31	Pcdh9	Pcdh9-S-31	FSM	0	0	2.11911	0	0	1.96174	0	0	0	0	0	0	0	2.76866	0	2.6496	0	0	0	0	3.65835	0	2.97402	0	0	0	0	0	0	0	0	0	0	0	0	0	0	0	0	0	0	0	0	0	0	0
PB.39268.103	Exosc1	Exosc1-S-103	ISM	1.86468	0	0	2.16213	2.2995	0	0	0	0	0	1.99726	0	0	0	0	1.6832	0	0	0	0	0	0	0	0	0	0	0	0	0	0	0	0	0	0	0	0	0	0	0	0	0	0	0	0	0	0
PB.47496.8	Smc4	Smc4-S-8	ISM	0	2.67612	0	3.18091	0	2.58199	2.09948	2.055	2.19357	0	0	0	3.54337	2.76866	2.23382	3.58524	1.57395	2.63759	1.92483	0	0	0	0	0	0	0	0	0	0	0	0	0	0	0	0	3.47019	0	0	0	0	0	0	0	0	0	0
PB.11283.395	Ccdc69	Ccdc69-S-395	FSM	3.34178	2.04954	2.11911	0	3.3289	1.96174	0	0	2.82934	0	3.00104	2.41757	2.66954	3.64657	3.08368	3.69994	0	0	0	0	0	0	0	0	0	0	0	2.87225	0	0	0	0	0	0	0	0	0	0	0	0	0	0	0	0	0	0
PB.46360.75	Armc1	Armc1-S-75	ISM	1.86468	0	2.11911	2.16213	0	0	0	0	0	0	1.99726	0	0	2.76866	0	0	1.57395	0	0	0	0	0	0	0	0	0	0	0	0	0	0	0	0	0	0	0	0	0	0	0	0	0	0	0	0	0
PB.34940.8	Foxn2	Foxn2-S-8	ISM	0	0	2.11911	0	2.94119	0	0	0	0	0	1.99726	0	2.04338	0	0	2.27886	0	2.01354	0	0	0	0	0	0	0	0	0	0	0	0	0	0	0	0	0	0	0	0	0	0	0	0	0	0	0	0
PB.9277.200	Usp15	Usp15-S-200	ISM	1.86468	3.05837	0	0	2.94119	1.96174	0	2.055	0	0	3.00104	2.41757	0	3.15298	1.64244	3.30676	0	2.01354	0	0	0	0	0	0	2.74483	0	0	0	0	0	0	0	0	0	0	0	0	0	0	0	0	0	0	0	0	0
PB.29869.3	Wdr53	Wdr53-S-3	FSM	0	0	0	0	0	1.96174	0	0	0	0	0	0	0	0	1.64244	1.6832	0	0	0	0	0	0	0	0	0	0	0	0	0	0	0	0	0	0	3.13018	0	0	0	0	2.95272	0	0	0	0	0	0
PB.45988.12	Uckl1	Uckl1-S-12	FSM	0	0	2.75031	0	0	1.96174	0	2.68196	2.19357	2.1791	0	1.80981	0	0	1.64244	1.6832	2.15772	0	1.92483	0	0	0	0	3.04884	0	3.37154	0	0	0	0	0	0	0	0	0	0	0	0	0	0	0	0	0	0	0	0
PB.62601.45	Mrpl35	Mrpl35-S-45	FSM	0	2.04954	0	0	0	0	0	0	0	0	0	0	0	2.13636	1.64244	0	0	2.01354	0	0	0	0	0	0	0	0	0	0	0	0	0	0	0	0	0	0	0	0	0	0	0	0	0	0	0	0
PB.52709.56	Prpf38a	Prpf38a-S-56	ISM	0	2.04954	0	0	0	0	0	0	0	0	1.99726	1.80981	0	2.76866	1.64244	2.27886	0	0	0	0	0	0	0	0	0	0	0	0	0	0	0	0	0	0	0	0	0	0	0	0	0	0	0	0	0	0
PB.43159.23	Katnbl1	Katnbl1-S-23	ISM	0	2.04954	0	0	0	0	0	0	0	0	1.99726	0	2.04338	0	1.64244	2.27886	0	0	0	0	0	0	0	0	2.74483	0	0	0	0	0	0	0	0	0	0	0	0	0	0	0	0	0	0	0	0	0
PB.42050.46	Ssb	Ssb-S-46	ISM	2.85426	2.04954	3.41098	0	0	0	0	2.055	0	0	3.27621	3.27889	3.72086	3.82454	2.87192	4.06003	0	0	1.92483	0	0	0	0	0	0	0	0	0	0	0	0	0	0	0	0	0	0	0	0	0	0	0	0	0	0	0
PB.68174.9	Ccdc90b	Ccdc90b-S-9	ISM	0	2.04954	2.75031	0	2.2995	0	0	0	0	0	2.62014	0	2.04338	3.64657	0	2.6496	0	2.01354	0	0	0	0	0	0	2.74483	0	0	0	0	0	0	0	0	0	0	0	0	0	0	0	0	0	0	0	0	0
PB.43175.40	Aven	Aven-S-40	ISM	0	0	2.11911	0	0	1.96174	0	0	0	0	0	0	0	2.13636	1.64244	0	0	2.01354	0	0	0	0	0	0	0	0	2.80904	0	0	0	0	0	0	0	0	0	0	0	0	0	0	0	0	0	0	0
PB.77094.62	Mei4	Mei4-S-62	NNC	1.86468	0	0	2.16213	0	0	0	0	2.19357	2.1791	1.99726	1.80981	2.66954	0	0	1.6832	1.57395	0	1.92483	0	0	0	2.97402	0	0	0	0	0	0	0	0	0	0	0	0	0	0	0	0	0	0	0	0	0	0	0
PB.49933.535	Nexn	Nexn-S-535	NIC	0	0	0	0	0	1.96174	0	0	0	0	0	2.41757	0	0	0	1.6832	1.57395	2.01354	0	0	0	0	0	0	0	0	0	0	0	0	0	0	0	0	0	0	0	0	0	0	0	0	0	0	0	0
PB.74763.4	Eif3g	Eif3g-S-4	ISM	0	0	0	0	0	0	0	0	0	0	0	0	0	0	1.64244	0	0	2.01354	0	0	2.99065	0	0	0	0	0	0	0	0	0	4.5794	3.31925	3.77792	0	0	0	3.78336	3.63534	0	2.95272	3.88458	0	0	0	4.19825	0
PB.67149.67	Tsg101	Tsg101-S-67	ISM	0	0	0	0	0	0	0	2.055	0	0	0	1.80981	2.66954	2.76866	0	0	1.57395	0	0	0	0	0	0	0	0	0	0	0	0	0	0	0	0	0	0	0	0	0	0	0	0	0	0	0	0	0
PB.78112.52	Elp6	Elp6-S-52	NNC	0	0	0	0	0	0	0	2.055	0	0	0	0	0	0	0	0	0	0	0	0	0	0	0	0	0	0	0	0	0	0	0	0	0	0	0	0	3.11271	2.96822	0	0	0	0	0	0	0	0
PB.44781.32	Phf20	Phf20-S-32	NNC	2.85426	3.33425	2.11911	3.18091	2.94119	1.96174	2.09948	0	2.82934	0	3.27621	4.04659	3.87154	3.42993	3.08368	2.6496	2.52389	3.68734	3.58696	0	0	0	0	3.04884	0	0	0	0	0	0	0	0	0	0	0	0	0	0	0	0	0	0	0	0	0	0
PB.22765.7	Vcl	Vcl-S-7	NNC	0	0	2.11911	0	2.2995	0	0	0	0	0	0	0	0	0	2.60293	1.6832	0	2.01354	0	0	0	0	0	0	0	0	0	0	0	0	0	0	0	0	0	0	0	0	0	0	0	0	0	0	0	0
PB.15475.23	Smc6	Smc6-S-23	ISM	1.86468	2.67612	0	0	0	0	2.09948	0	0	0	1.99726	1.80981	2.04338	0	0	2.27886	0	0	0	0	0	0	0	0	0	0	0	0	0	0	0	0	0	0	0	0	0	0	0	0	0	0	0	0	0	0
PB.51317.1	Sec61b	Sec61b-S-1	FSM	7.26918	7.31949	7.2068	7.277	7.30645	7.41661	7.19527	6.88876	7.11956	7.18375	7.37749	7.26654	6.75778	7.5002	7.01926	7.33341	6.8109	6.88852	6.70283	6.44914	6.55143	6.24218	6.44951	6.76262	7.04873	6.93489	6.5984	7.2092	7.18068	5.49473	5.04555	4.39345	5.26405	4.60576	4.70402	4.83288	4.68591	5.31827	5.55445	5.10244	4.96939	4.12752	4.3794	5.25794	5.97741	0
PB.28329.27	Spats2	Spats2-S-27	FSM	0	0	0	0	0	0	0	0	0	0	0	0	2.04338	0	0	0	0	0	0	0	2.99065	3.43962	0	0	0	0	2.80904	0	0	0	0	0	0	0	0	0	0	0	0	2.95272	0	0	0	0	0	0
PB.67149.63	Tsg101	Tsg101-S-63	ISM	1.86468	2.04954	0	0	0	0	0	0	0	0	0	0	0	2.13636	2.87192	2.6496	0	0	0	0	0	0	0	0	0	0	0	0	0	0	0	0	0	0	0	0	0	0	0	0	0	0	0	0	0	0
PB.55337.10	Cdk11b	Cdk11b-S-10	ISM	2.85426	0	2.11911	0	2.2995	0	0	0	0	0	2.62014	1.80981	3.54337	2.13636	2.23382	1.6832	1.57395	2.01354	1.92483	0	0	0	0	0	0	0	0	0	0	0	0	0	0	0	0	0	0	0	0	0	0	0	0	0	0	0
PB.4313.44	Prdx6	Prdx6-S-44	ISM	0	0	0	0	0	1.96174	0	0	0	0	0	0	0	0	0	0	0	0	0	0	0	3.43962	0	0	2.74483	0	0	0	0	0	0	0	0	0	0	0	0	0	0	0	0	0	0	0	0	0
PB.44611.25	Mapre1	Mapre1-S-25	ISM	1.86468	2.67612	0	0	2.94119	0	0	0	0	0	3.00104	0	2.04338	2.76866	0	1.6832	0	0	0	0	0	0	0	0	0	0	0	0	0	0	0	0	0	0	0	0	0	0	0	0	0	0	0	0	0	0
PB.47496.6	Smc4	Smc4-S-6	ISM	1.86468	2.04954	0	0	2.2995	0	0	0	2.19357	0	0	0	2.66954	0	1.64244	0	0	2.63759	1.92483	0	0	0	0	0	0	0	2.80904	0	0	0	0	0	0	0	0	0	0	0	0	0	0	0	0	0	0	0
PB.72530.14	Orc6	Orc6-S-14	ISM	1.86468	2.67612	2.11911	0	2.2995	1.96174	0	0	0	0	3.00104	2.79287	3.32743	0	2.23382	3.30676	1.57395	2.01354	0	0	0	0	0	0	0	0	0	0	0	0	0	0	0	0	0	0	0	0	0	0	0	0	0	0	0	0
PB.52920.193	Nasp	Nasp-S-193	FSM	4.59683	4.56122	4.70823	4.00418	4.28708	4.38767	2.72941	3.34029	3.21493	0	5.07655	5.03876	5.00237	5.51126	4.15129	5.4333	3.17614	4.36789	3.58696	2.84395	0	0	0	0	3.40532	0	0	0	0	0	0	0	0	0	0	0	0	0	0	0	0	0	0	0	0	0
PB.42040.19	Phospho2	Phospho2-S-19	FSM	1.86468	0	0	0	0	0	0	0	0	0	0	2.41757	0	2.13636	0	0	0	0	0	0	0	0	0	0	0	2.71216	0	0	0	0	0	0	0	0	0	0	0	0	0	0	0	0	0	0	0	0
PB.59026.183	Oas1d	Oas1d-S-183	ISM	0	2.04954	0	0	0	0	0	0	0	0	0	1.80981	0	0	0	1.6832	0	2.01354	1.92483	0	0	0	0	0	0	0	0	0	0	0	0	0	0	0	0	0	0	0	0	0	0	0	0	3.88715	0	0
PB.20439.51	Ddx41	Ddx41-S-51	ISM	1.86468	2.04954	2.11911	0	0	0	0	0	0	0	1.99726	0	0	2.13636	0	0	1.57395	2.01354	0	0	0	0	0	0	0	0	0	0	0	0	0	0	0	0	0	0	0	0	0	0	0	0	3.6987	0	0	0
PB.9456.6	Naca	Naca-S-6	ISM	0	0	0	0	0	0	0	0	0	0	1.99726	2.79287	0	0	0	1.6832	0	0	1.92483	0	0	0	0	0	0	2.71216	0	0	0	0	0	0	0	0	0	0	0	0	0	0	0	0	0	0	0	0
PB.17446.79	Rbm25	Rbm25-S-79	ISM	0	0	2.11911	0	2.2995	0	0	0	0	2.1791	1.99726	0	3.32743	0	0	1.6832	0	2.01354	0	0	0	0	0	0	0	0	0	0	0	0	0	0	0	0	0	0	0	0	0	0	0	0	0	0	0	0
PB.17357.35	Srsf5	Srsf5-S-35	ISM	0	2.04954	0	0	2.94119	0	0	0	2.19357	0	0	1.80981	0	2.13636	1.64244	1.6832	0	0	0	0	0	0	0	0	2.74483	0	0	0	0	0	0	0	0	0	0	0	3.11271	0	0	0	0	0	0	0	0	0
PB.79493.57	Upf3b	Upf3b-S-57	ISM	2.85426	3.05837	0	2.79601	0	2.58199	0	0	0	0	0	1.80981	3.32743	2.76866	1.64244	2.91945	2.15772	2.63759	1.92483	0	0	0	0	0	0	2.71216	0	0	0	0	0	0	0	0	0	0	0	0	0	0	0	0	0	0	0	0
PB.29865.13	Bex6	Bex6-S-13	FSM	0	0	0	0	0	0	0	0	0	0	0	0	0	0	0	0	0	0	0	0	0	0	0	0	0	0	0	0	0	0	0	0	4.68039	3.24901	0	0	0	0	3.11123	3.61942	0	0	0	3.88715	0	0
PB.23078.39	Sfmbt1	Sfmbt1-S-39	ISM	0	0	0	0	2.94119	1.96174	0	2.055	0	0	0	0	2.04338	0	0	0	2.15772	2.01354	0	0	0	0	0	0	0	2.71216	0	0	0	0	0	0	0	0	0	0	0	0	0	0	0	0	0	0	0	0
PB.38805.1	Uhrf2	Uhrf2-S-1	FSM	0	0	0	0	0	0	0	0	2.19357	0	0	0	0	0	0	0	0	0	0	0	0	0	0	0	0	0	0	0	0	0	0	0	0	0	3.80123	0	3.11271	0	0	0	0	0	0	0	0	0
PB.24081.35	Cdadc1	Cdadc1-S-35	FSM	0	2.04954	0	0	0	0	0	0	0	0	0	0	0	0	1.64244	0	0	0	0	0	0	0	0	3.04884	0	0	0	0	0	0	0	3.31925	0	0	0	0	3.11271	0	0	0	0	0	0	0	0	0
PB.12843.30	Pex12	Pex12-S-30	FSM	0	0	2.11911	0	0	0	0	0	0	0	0	0	0	0	0	0	0	0	0	0	0	0	0	0	0	0	0	0	0	0	0	0	0	3.24901	0	0	0	0	0	0	0	0	0	0	0	0
PB.69861.44	Psmd13	Psmd13-S-44	ISM	0	0	0	0	0	0	0	0	0	0	0	0	0	0	0	0	0	0	0	0	0	0	0	0	0	0	0	0	0	0	0	0	0	0	0	3.47019	0	0	0	0	0	0	0	0	0	0
PB.62103.274	Hnrnpa2b1	Hnrnpa2b1-S-274	ISM	0	2.04954	0	0	0	0	0	0	0	0	2.62014	0	0	0	0	2.6496	0	0	1.92483	0	0	0	0	0	0	0	0	0	0	0	0	0	0	0	0	0	0	0	0	0	0	0	0	0	0	0
PB.11018.140	Canx	Canx-S-140	ISM	0	0	0	0	0	0	0	0	0	0	0	0	2.04338	2.13636	0	1.6832	1.57395	0	0	0	0	0	0	0	0	0	0	0	0	0	0	0	0	0	0	0	0	0	0	0	0	0	0	0	0	0
PB.3756.27	Aspm	Aspm-S-27	NIC	0	0	2.11911	0	0	0	0	0	0	0	1.99726	2.41757	0	2.13636	0	1.6832	0	0	0	0	0	0	0	0	0	0	0	0	0	0	0	0	0	0	0	0	0	0	0	0	0	0	0	0	0	0
PB.44523.37	Tpx2	Tpx2-S-37	ISM	0	0	0	0	0	1.96174	0	0	0	0	1.99726	0	0	0	0	2.6496	0	2.01354	0	0	0	0	0	0	2.74483	0	0	2.87225	0	0	0	0	0	0	0	0	0	0	0	0	0	0	0	0	0	0
PB.32624.7	Pxt1	Pxt1-S-7	ISM	1.86468	2.04954	2.11911	0	2.2995	0	0	0	0	2.1791	3.00104	2.41757	2.04338	2.13636	1.64244	2.27886	2.52389	3.01892	1.92483	0	0	3.43962	0	0	3.40532	2.71216	0	0	0	0	3.01019	0	0	0	0	3.47019	0	0	0	0	0	0	0	0	0	0
PB.77182.190	Me1	Me1-S-190	ISM	1.86468	2.67612	2.11911	0	0	2.58199	2.09948	0	0	0	0	0	2.04338	2.76866	1.64244	2.6496	0	0	1.92483	0	0	0	3.64129	0	2.74483	2.71216	0	0	3.94143	0	0	0	0	0	0	0	0	0	0	0	0	0	0	0	0	0
PB.61444.52	Mkln1	Mkln1-S-52	NNC	1.86468	2.67612	0	0	0	0	2.72941	0	0	2.1791	0	0	0	0	1.64244	0	0	0	1.92483	0	2.99065	0	0	0	0	0	0	0	0	0	0	0	0	0	0	0	0	0	0	0	0	0	0	0	0	0
PB.54177.11	Ncmap	Ncmap-S-11	ISM	0	0	0	0	0	0	0	0	0	0	0	0	0	0	0	0	0	0	0	0	0	0	0	0	0	0	0	0	0	0	0	0	0	3.24901	3.80123	0	0	2.96822	0	2.95272	0	0	0	0	0	0
PB.26306.127	Azin1	Azin1-S-127	ISM	0	2.04954	0	0	0	0	0	0	0	0	0	0	0	2.13636	0	0	0	2.01354	0	0	0	3.43962	0	0	0	0	0	0	0	0	0	0	0	0	0	0	0	0	0	0	0	0	0	0	0	0
PB.42828.518	Accsl	Accsl-S-518	ISM	0	0	0	0	0	0	0	0	0	0	0	1.80981	0	0	1.64244	1.6832	0	0	0	0	2.99065	0	0	0	0	0	0	2.87225	0	0	0	0	0	0	0	0	0	0	0	0	0	0	0	0	0	0
PB.37011.42	Rnmt	Rnmt-S-42	ISM	0	0	2.11911	0	0	0	0	0	0	0	1.99726	0	0	0	0	0	0	0	0	0	0	0	0	0	0	0	0	0	0	0	0	0	0	3.24901	0	3.47019	0	0	0	0	0	0	0	0	0	0
PB.82482.38	AC163611.2	AC163611.2-S-38	NNC	0	0	0	0	0	0	0	0	0	0	0	1.80981	0	0	2.23382	1.6832	0	0	0	2.84395	0	0	0	3.04884	2.74483	0	2.80904	0	0	0	0	0	0	0	0	0	0	0	0	0	0	0	0	0	0	0
PB.34569.151	Strn	Strn-S-151	ISM	0	3.55023	0	0	3.3289	0	0	0	2.19357	0	1.99726	2.79287	2.66954	3.15298	1.64244	2.91945	0	3.01892	0	0	0	0	0	0	3.40532	0	0	0	0	0	0	0	0	0	0	0	0	0	0	0	0	0	0	0	0	0
PB.10813.8	Gm12144	Gm12144-S-8	NNC	0	2.04954	2.11911	2.16213	2.2995	0	0	0	0	2.1791	0	2.41757	0	0	1.64244	0	1.57395	2.01354	1.92483	0	0	0	0	0	0	0	0	0	3.94143	0	0	0	0	0	0	0	0	0	0	0	3.88458	0	0	0	0	0
PB.932.38	Unc50	Unc50-S-38	ISM	0	0	0	0	0	2.58199	0	0	0	0	1.99726	2.41757	2.66954	2.13636	3.75367	1.6832	0	2.01354	0	0	0	0	0	0	0	0	2.80904	3.93241	0	0	0	0	0	0	0	0	0	0	0	0	0	0	0	0	0	0
PB.9120.44	Llph	Llph-S-44	ISM	0	0	0	0	0	0	0	0	0	0	0	0	0	0	1.64244	0	0	0	0	2.84395	0	0	0	0	0	0	2.80904	0	0	0	3.67839	0	0	4.60576	3.80123	0	0	3.63534	4.1797	0	0	4.12752	0	0	0	0
PB.63871.98	Bms1	Bms1-S-98	ISM	1.86468	2.04954	0	0	0	2.58199	0	0	0	0	1.99726	2.41757	2.66954	3.15298	2.87192	3.13174	0	0	0	0	0	0	0	0	0	0	0	0	0	0	0	0	0	0	0	0	0	0	0	0	0	0	0	0	0	0
PB.62157.21	Tax1bp1	Tax1bp1-S-21	ISM	2.47719	2.67612	0	0	2.2995	0	0	0	0	0	3.00104	0	0	3.15298	0	2.27886	0	2.01354	1.92483	0	0	0	0	0	0	0	0	0	0	0	0	0	0	0	0	0	0	0	0	0	0	0	0	0	0	0
PB.24313.131	Esco2	Esco2-S-131	ISM	2.85426	3.72776	2.75031	3.18091	3.60758	1.96174	0	0	2.19357	0	3.95029	3.60454	3.32743	3.97556	3.65091	4.57904	2.79133	3.29432	3.19524	0	0	0	0	0	3.40532	0	0	0	0	0	0	0	0	0	0	0	0	0	0	0	0	0	0	0	0	0
PB.34365.9	Myl12a	Myl12a-S-9	NNC	2.47719	2.04954	2.75031	2.16213	2.2995	0	0	2.055	0	0	0	1.80981	2.04338	2.13636	0	0	1.57395	2.01354	0	0	0	0	0	0	0	0	0	0	0	0	0	0	0	0	0	0	0	0	0	0	0	0	0	0	0	0
PB.33514.1	Slc35b2	Slc35b2-S-1	FSM	0	0	0	0	0	0	0	0	0	0	0	0	0	0	0	0	0	0	0	0	0	0	0	0	0	0	0	0	0	0	3.01019	3.31925	0	0	0	3.47019	0	0	0	2.95272	0	0	0	0	4.19825	0
PB.34885.5	Msh2	Msh2-S-5	ISM	0	0	0	0	0	0	0	0	0	0	0	0	0	0	0	0	0	0	0	0	0	0	0	0	0	0	0	0	0	0	0	0	0	0	0	0	0	0	3.11123	0	0	0	0	0	4.19825	0
PB.21783.21	Map1b	Map1b-S-21	ISM	0	0	0	0	2.2995	1.96174	0	0	0	0	0	1.80981	0	0	0	2.27886	0	3.01892	0	0	0	0	0	0	0	2.71216	0	0	0	0	0	0	0	0	0	0	0	0	0	0	0	0	0	0	0	0
PB.33295.15	Zfp57	Zfp57-S-15	FSM	0	0	0	0	0	0	0	0	0	0	1.99726	1.80981	0	2.76866	1.64244	1.6832	0	0	0	0	0	0	0	0	0	0	2.80904	0	0	0	0	0	0	0	0	0	0	0	0	0	0	0	0	0	0	0
PB.78794.121	Bmp15	Bmp15-S-121	FSM	0	0	0	0	0	2.58199	0	0	0	0	1.99726	2.41757	2.04338	0	0	1.6832	1.57395	0	0	2.84395	0	0	2.97402	0	3.40532	2.71216	0	0	0	0	0	0	0	0	0	0	0	0	0	0	0	0	0	0	0	0
PB.57371.2	Fip1l1	Fip1l1-S-2	ISM	0	0	3.41098	0	2.94119	1.96174	2.09948	2.055	0	0	3.66901	2.41757	0	3.15298	2.23382	2.6496	2.15772	2.01354	0	0	0	0	0	0	0	0	0	0	0	0	0	0	0	0	0	0	0	0	0	0	0	0	0	0	0	0
PB.40333.12	Gm13269	Gm13269-S-12	NNC	3.34178	3.05837	2.75031	3.45816	3.3289	3.9099	0	0	0	0	2.62014	2.79287	3.87154	2.13636	3.65091	2.91945	2.15772	2.01354	2.92112	3.50757	2.99065	0	0	3.04884	3.40532	2.71216	3.86665	4.21519	0	0	0	0	0	0	3.13018	0	0	0	0	0	0	0	0	0	0	0
PB.38102.18	Ubxn1	Ubxn1-S-18	ISM	0	2.04954	0	0	2.2995	0	0	0	0	0	1.99726	2.41757	0	0	0	0	0	0	0	0	0	0	0	0	0	0	0	0	0	0	0	0	0	0	0	0	0	0	0	0	0	0	0	0	0	0
PB.64532.186	E330021D16Rik	E330021D16Rik-S-186	NNC	2.47719	2.04954	2.11911	0	2.94119	0	0	0	0	0	1.99726	0	0	2.13636	1.64244	1.6832	1.57395	0	0	0	0	0	0	0	0	0	0	0	0	0	0	0	0	0	0	0	0	0	0	0	0	0	0	0	0	0
PB.34569.156	Strn	Strn-S-156	ISM	0	2.04954	0	0	0	1.96174	0	0	0	0	2.62014	2.79287	0	0	0	2.27886	0	0	0	0	2.99065	3.43962	0	0	2.74483	0	0	0	0	0	0	0	0	0	0	0	0	0	0	0	0	0	0	0	0	0
PB.39840.225	Ccdc186	Ccdc186-S-225	ISM	2.47719	0	2.75031	0	3.60758	1.96174	2.72941	2.68196	0	0	2.62014	1.80981	3.54337	2.13636	0	3.13174	0	3.29432	0	0	0	0	0	0	0	0	2.80904	0	0	0	0	0	0	0	0	0	0	0	0	0	0	0	0	0	0	0
PB.37780.3	Sf3b2	Sf3b2-S-3	ISM	0	2.04954	0	2.79601	2.2995	2.58199	0	0	0	0	1.99726	1.80981	3.05164	2.76866	2.23382	2.27886	0	0	1.92483	3.50757	4.05518	0	3.64129	4.11533	0	0	0	0	0	0	0	0	0	0	0	0	0	0	0	0	4.56739	0	0	0	0	0
PB.28402.125	Atf1	Atf1-S-125	ISM	0	0	0	0	0	0	0	0	0	0	0	0	0	0	0	0	0	0	0	0	0	0	0	0	0	0	0	0	0	0	0	0	3.77792	3.24901	3.13018	3.47019	3.11271	0	3.11123	0	0	0	0	0	0	0
PB.37165.41	Rpl17	Rpl17-S-41	ISM	1.86468	0	0	0	0	0	0	0	0	0	1.99726	0	0	0	1.64244	2.27886	0	0	0	0	2.99065	0	0	0	0	0	0	0	0	0	0	0	0	0	0	0	0	0	0	0	0	0	0	0	0	0
PB.2293.6	4933436I20Rik	4933436I20Rik-S-6	NNC	1.86468	2.04954	2.11911	2.79601	2.2995	0	0	0	0	0	2.62014	1.80981	0	0	0	2.27886	1.57395	0	1.92483	2.84395	0	0	0	3.04884	0	0	0	0	0	0	0	0	0	0	0	0	0	0	0	0	0	0	0	0	0	0
PB.69336.65	Kif22	Kif22-S-65	ISM	1.86468	0	0	0	2.2995	0	0	0	0	0	0	1.80981	0	2.13636	0	1.6832	0	0	0	0	0	0	0	0	0	0	0	0	0	0	0	0	0	0	0	0	0	0	0	0	0	0	0	0	0	0
PB.54772.70	Gm13212	Gm13212-S-70	NNC	0	0	0	0	0	0	0	0	0	0	0	0	0	0	0	0	0	0	0	0	0	0	0	0	0	0	0	0	0	0	0	0	0	0	0	0	0	0	0	0	0	0	0	0	0	0
PB.63760.84	Raf1	Raf1-S-84	ISM	1.86468	0	0	0	0	0	0	0	0	0	1.99726	0	2.04338	0	0	0	1.57395	0	0	0	0	0	0	0	0	0	0	2.87225	0	0	0	0	0	0	0	0	0	0	0	0	0	0	0	0	0	0
PB.44781.66	Phf20	Phf20-S-66	NNC	0	2.04954	0	2.16213	0	0	0	0	0	0	0	1.80981	2.04338	2.13636	0	1.6832	0	2.63759	0	0	0	0	0	0	0	0	0	0	0	0	0	0	0	0	0	0	0	0	0	0	0	0	0	0	0	0
PB.21590.146	Zbed3	Zbed3-S-146	FSM	0	0	0	0	0	1.96174	2.72941	0	0	0	3.00104	1.80981	2.04338	2.13636	0	1.6832	0	2.01354	0	0	0	0	0	0	0	0	0	0	0	0	0	0	0	0	0	0	0	0	0	0	0	0	0	0	0	0
PB.22325.11	4833420G17Rik	4833420G17Rik-S-11	ISM	0	0	2.75031	0	0	0	0	0	0	0	0	0	0	0	0	1.6832	1.57395	0	0	0	0	3.43962	0	0	0	0	0	0	0	0	0	3.31925	0	0	0	0	0	0	0	3.61942	0	0	0	0	0	0
PB.58037.1	Cops4	Cops4-S-1	FSM	0	0	0	0	0	0	0	0	0	2.1791	1.99726	0	2.04338	2.13636	0	2.27886	0	0	0	0	0	0	0	0	0	0	0	0	0	0	0	0	0	0	0	0	0	0	0	0	0	0	0	0	0	0
PB.78318.184	Gpd1l	Gpd1l-S-184	ISM	0	0	0	0	0	0	0	0	0	0	0	0	0	0	0	0	0	0	0	0	0	0	0	0	2.74483	0	0	0	0	0	0	0	0	0	0	0	0	0	3.11123	0	0	0	0	3.88715	0	0
PB.32270.96	Jpt2	Jpt2-S-96	FSM	0	0	2.11911	0	2.2995	0	0	0	0	0	0	0	0	2.13636	0	0	0	0	0	2.84395	0	0	0	0	2.74483	0	0	0	0	0	0	0	0	0	0	0	0	0	0	0	0	0	0	0	0	0
PB.63789.49	H1foo	H1foo-S-49	ISM	0	3.33425	2.11911	2.16213	2.2995	0	0	0	2.82934	0	3.00104	2.41757	2.66954	0	0	2.6496	1.57395	0	0	0	0	0	0	0	0	0	0	0	0	0	0	0	0	0	0	0	0	0	0	0	0	0	0	0	0	0
PB.74570.4	Cwc15	Cwc15-S-4	ISM	1.86468	0	3.13424	0	0	1.96174	2.09948	0	0	0	3.49177	0	3.05164	2.13636	2.60293	2.91945	1.57395	0	1.92483	0	0	0	0	0	0	0	0	0	0	0	0	0	0	0	0	0	0	0	0	0	0	0	0	0	0	0
PB.72554.127	Dnaja2	Dnaja2-S-127	ISM	0	0	0	0	0	1.96174	0	0	0	0	0	0	2.04338	0	0	1.6832	2.15772	2.01354	0	0	0	0	0	0	0	0	0	0	0	0	0	0	0	0	0	0	0	0	0	0	0	0	0	0	0	0
PB.28474.42	Slc4a8	Slc4a8-S-42	ISM	0	2.04954	0	0	0	0	0	0	0	0	0	1.80981	0	0	1.64244	0	0	0	0	3.50757	2.99065	0	0	0	2.74483	2.71216	0	0	3.94143	0	0	0	0	0	0	0	0	0	0	0	0	0	0	0	0	0
PB.14210.147	Cdc27	Cdc27-S-147	ISM	0	2.04954	0	0	0	0	0	0	2.19357	0	0	1.80981	0	2.13636	1.64244	0	0	0	0	0	0	0	0	0	0	0	0	0	0	0	0	0	0	0	0	0	0	0	0	0	0	0	0	0	0	0
PB.68867.83	Copb1	Copb1-S-83	ISM	0	0	0	0	0	0	0	0	0	0	1.99726	2.79287	0	0	1.64244	2.27886	0	2.63759	0	0	0	0	0	0	0	0	0	0	0	0	0	0	0	0	0	0	0	0	0	0	0	0	0	0	0	0
PB.24750.9	Sugt1	Sugt1-S-9	ISM	1.86468	3.87847	3.95635	0	2.94119	0	0	0	0	0	1.99726	2.41757	3.32743	3.42993	2.87192	3.89611	0	2.01354	1.92483	0	0	0	0	0	2.74483	0	0	0	0	0	0	0	0	0	0	0	0	0	0	0	0	0	0	0	0	0
PB.30136.4	Golgb1	Golgb1-S-4	NNC	0	2.67612	0	0	2.94119	2.58199	0	0	2.19357	2.1791	1.99726	1.80981	2.66954	3.15298	1.64244	3.30676	0	3.01892	0	0	0	0	0	0	0	0	0	0	0	0	0	0	0	0	0	0	0	0	0	0	0	0	0	0	0	0
PB.42753.49	Arhgap1	Arhgap1-S-49	ISM	1.86468	0	0	0	0	0	0	0	0	0	0	0	0	0	0	0	0	2.01354	0	0	0	0	0	0	0	0	0	0	0	0	0	0	0	0	0	0	0	0	0	0	0	0	0	0	0	0
PB.44033.189	Gpcpd1	Gpcpd1-S-189	ISM	2.47719	3.33425	0	0	0	0	0	0	0	0	0	0	2.66954	0	2.23382	2.27886	0	0	0	0	0	0	0	0	0	0	0	0	0	0	0	0	0	0	0	0	0	0	0	0	0	0	0	0	0	0
PB.73405.74	Sf3b3	Sf3b3-S-74	ISM	0	0	0	0	2.2995	0	0	0	0	0	0	0	2.04338	2.76866	1.64244	0	0	2.63759	0	0	0	0	0	0	0	0	0	0	0	0	0	0	0	0	0	0	0	0	0	0	0	0	0	0	0	0
PB.46108.81	Il7	Il7-S-81	ISM	1.86468	0	0	0	2.94119	1.96174	0	0	0	0	2.62014	2.41757	2.04338	0	1.64244	2.91945	0	3.01892	0	0	0	0	0	0	0	0	0	0	0	0	0	0	0	0	0	0	0	0	0	0	0	0	0	0	0	0
PB.41025.9	Dolk	Dolk-S-9	FSM	0	0	0	0	0	0	0	0	0	0	0	0	0	0	0	0	0	2.01354	0	0	0	0	0	0	0	0	0	0	0	0	3.01019	3.31925	3.10739	0	4.48314	3.47019	0	3.63534	3.78185	3.61942	0	0	0	0	0	0
PB.3756.22	Aspm	Aspm-S-22	NIC	2.47719	2.04954	0	0	0	0	2.09948	0	0	0	3.49177	3.84979	3.05164	2.76866	0	3.30676	0	0	0	0	0	0	0	0	0	0	0	0	0	0	0	0	0	0	0	0	0	0	0	0	0	0	0	0	0	0
PB.60079.6	A430033K04Rik	A430033K04Rik-S-6	FSM	1.86468	0	2.11911	0	0	0	0	0	0	0	1.99726	2.41757	3.05164	3.42993	2.60293	3.45567	0	0	0	0	2.99065	0	0	0	0	0	0	0	0	0	0	0	0	0	0	0	0	0	0	0	0	0	0	0	0	0
PB.47496.23	Smc4	Smc4-S-23	ISM	0	2.04954	0	0	2.2995	0	0	0	0	0	0	1.80981	0	0	0	1.6832	0	2.01354	0	0	0	0	0	0	0	0	0	0	0	0	0	0	0	0	0	0	0	0	0	0	0	0	0	0	0	0
PB.28061.87	Zcrb1	Zcrb1-S-87	FSM	0	0	3.13424	0	0	1.96174	0	0	0	0	1.99726	0	0	2.13636	1.64244	2.27886	0	0	0	0	0	0	0	3.04884	0	0	0	0	3.94143	0	0	0	0	0	0	0	0	0	0	0	0	0	0	0	0	0
PB.77767.8	Nek11	Nek11-S-8	NNC	0	2.04954	0	0	0	0	0	0	2.82934	0	0	0	0	0	0	1.6832	0	2.01354	0	0	0	0	0	0	0	0	2.80904	0	0	0	0	0	0	0	0	0	0	0	0	0	0	0	0	0	0	0
PB.49933.523	Nexn	Nexn-S-523	NIC	0	0	0	2.16213	0	1.96174	0	0	0	2.1791	0	0	0	0	0	2.27886	0	2.01354	1.92483	0	0	0	0	0	0	0	0	0	0	0	0	0	0	0	0	0	0	0	0	0	0	0	0	0	0	0
PB.24354.93	Ppp2r2a	Ppp2r2a-S-93	ISM	0	2.67612	0	0	2.2995	2.58199	0	0	0	0	1.99726	1.80981	2.66954	2.13636	0	2.6496	0	2.01354	0	0	0	0	0	0	0	0	0	0	0	0	0	0	0	0	0	0	0	0	0	0	0	0	0	0	0	0
PB.65951.60	Rps19	Rps19-S-60	NIC	0	0	0	0	0	0	0	0	0	0	0	0	0	0	0	0	0	0	0	0	0	0	0	0	3.40532	0	0	0	0	0	0	0	0	0	0	0	0	0	3.11123	0	0	0	0	0	0	0
PB.40333.30	Gm13269	Gm13269-S-30	NNC	0	0	0	2.16213	0	0	0	0	0	0	0	0	0	0	0	1.6832	0	3.01892	1.92483	0	0	3.43962	0	0	0	0	0	0	0	0	0	0	0	0	0	0	0	0	0	0	0	0	0	0	0	0
PB.37165.10	Rpl17	Rpl17-S-10	ISM	1.86468	0	0	0	0	2.96193	2.09948	0	2.19357	0	1.99726	2.79287	3.05164	2.13636	3.25834	1.6832	0	2.01354	1.92483	0	0	0	2.97402	0	2.74483	0	0	0	0	0	0	0	0	0	0	0	0	0	0	0	0	0	0	0	0	0
PB.70030.163	Nap1l4	Nap1l4-S-163	ISM	3.12744	3.05837	0	0	2.94119	2.58199	0	0	0	0	3.00104	3.06512	2.66954	3.64657	2.60293	3.30676	0	0	0	0	2.99065	0	0	0	0	0	0	0	0	0	0	0	0	0	0	0	0	0	0	0	0	0	0	0	0	0
PB.20583.332	Hnrnpk	Hnrnpk-S-332	ISM	0	0	0	0	2.2995	0	0	0	0	0	1.99726	1.80981	0	2.13636	0	0	0	2.01354	0	0	0	0	0	0	0	0	0	0	0	0	0	0	0	0	0	0	0	0	0	0	0	0	0	0	0	0
PB.23556.45	Ktn1	Ktn1-S-45	ISM	0	0	2.11911	0	0	1.96174	0	0	0	0	0	1.80981	2.66954	2.13636	1.64244	3.30676	0	3.83791	0	0	0	0	0	0	0	0	0	0	0	0	0	0	0	0	0	0	0	0	0	0	0	0	0	0	0	0
PB.25235.9	Dnajc3	Dnajc3-S-9	ISM	2.47719	2.04954	3.13424	0	2.2995	0	0	2.055	2.19357	0	3.27621	2.79287	3.54337	2.13636	2.60293	3.58524	2.15772	3.29432	1.92483	0	0	0	0	0	0	0	0	0	0	0	0	0	0	0	0	0	0	0	0	0	0	0	0	0	0	0
[truncated: 115 more columns]
