# Supplementary material for: Single-cell full-length isoform sequencing reveals an abundance of 3’ prime partial transcripts in maternally inherited RNAs
Source: Research Square preprint supplement (doi:10.21203/rs.3.rs-1752209/v1), 2022-06-15
Supplement: Supplementary file 6 [file c270a2eaf47d03ebb625a114.xlsx]

## Sheet: Extended data table 5
Raw PB ID	Gene name	IsoformID	Isoform type by SQANTI3	GFP OE	Ncl-S-350 OE	Srsf4 OE
PB.37625.350	Ap3b1	Ap3b1-S-350	ISM	0.00612031	0.0182497	0.0152311
PB.36138.62	Ninj1	Ninj1-S-62	ISM	0.0272511	0.0152311	0.0242596
PB.152386.35	Gm8994	Gm8994-S-35	FSM	0	0.0122034	0.0212592
PB.114693.5	Hspa4l	Hspa4l-S-5	ISM	0.00306484	0.0122034	0.0182497
PB.135184.262	Ubc	Ubc-S-262	FSM	0	0.0242596	0.0182497
PB.131696.438	Hadha	Hadha-S-438	ISM	0.00306484	0.0595801	0.0624679
PB.112102.96	Trmt13	Trmt13-S-96	ISM	0.00306484	0.0508662	0.0450145
PB.166331.338	Vps35	Vps35-S-338	ISM	0.00916647	0.171633	0.169044
PB.49086.1061	Rad21	Rad21-S-1061	ISM	0.00612031	0.00916647	0.0710817
PB.143136.363	Tnpo3	Tnpo3-S-363	ISM	0	0.0212592	0.00306484
PB.151983.1439	Chd4	Chd4-S-1439	ISM	0.00306484	0.0182497	0.0595801
PB.91384.553	Cyb5r1	Cyb5r1-S-553	FSM	0	0.0212592	0.0182497
PB.157404.844	Atxn2l	Atxn2l-S-844	ISM	0.00306484	0.0450145	0.0595801
PB.72283.716	Kdm3b	Kdm3b-S-716	ISM	0	0.0508662	0.0739365
PB.49298.158	Tatdn1	Tatdn1-S-158	NNC	0.0122034	0.0182497	0.00916647
PB.23322.73	Vcpkmt	Vcpkmt-S-73	ISM	0.00612031	0.0332074	0.0653474
PB.156984.264	Plekha7	Plekha7-S-264	ISM	0	0.0391284	0.0537793
PB.136447.353	Fam133b	Fam133b-S-353	ISM	0.0361723	0.0479447	0.0302337
PB.141437.647	Zcwpw1	Zcwpw1-S-647	ISM	0.00916647	0.0450145	0.0479447
PB.25176.1844	Hsp90aa1	Hsp90aa1-S-1844	ISM	0	0.0212592	0.0182497
PB.14939.871	Ftsj3	Ftsj3-S-871	ISM	0.00306484	0.00916647	0.0272511
PB.150158.45	Dctn1	Dctn1-S-45	ISM	0	0.0152311	0.00612031
PB.124632.719	Ube4b	Ube4b-S-719	ISM	0	0.0272511	0.0566839
PB.73875.10	Smad2	Smad2-S-10	ISM	0.00612031	0.0332074	0.0332074
PB.166470.256	Brd7	Brd7-S-256	ISM	0.00916647	0.123977	0.0964865
PB.14417.515	Kpnb1	Kpnb1-S-515	ISM	0	0.00612031	0.0182497
PB.2472.1205	Ddx50	Ddx50-S-1205	NIC	0	0.0212592	0.0122034
PB.40260.565	Sncg	Sncg-S-565	ISM	0	0.0332074	0.0391284
PB.72343.396	Matr3	Matr3-S-396	ISM	0.00306484	0.0624679	0.0391284
PB.59733.5	Spice1	Spice1-S-5	ISM	0.0152311	0.0182497	0.0302337
PB.4680.385	Mdm2	Mdm2-S-385	ISM	0.00916647	0.0212592	0.0152311
PB.120148.247	Topors	Topors-S-247	FSM	0	0.0212592	0.0212592
PB.56854.253	Dzip3	Dzip3-S-253	ISM	0.00306484	0.0361723	0.0272511
PB.175706.5697	Eef1a1	Eef1a1-S-5697	ISM	0.335786	1.6532	1.78204
PB.153769.580	Actn4	Actn4-S-580	FSM	0.00306484	0.00612031	0.0302337
PB.159660.21	Etfb	Etfb-S-21	FSM	0.0796219	0.490005	0.578147
PB.171962.1307	Pdpr	Pdpr-S-1307	ISM	0	0.00916647	0.0212592
PB.171808.607	Pskh1	Pskh1-S-607	ISM	0.00612031	0	0.0152311
PB.130211.7715	Zfp988	Zfp988-S-7715	NNC	0.00612031	0.0710817	0.113071
PB.125688.569	Pnisr	Pnisr-S-569	FSM	0	0.0242596	0.00916647
PB.153953.326	Tdrd12	Tdrd12-S-326	ISM	0.00306484	0.0936954	0.0739365
PB.100933.3712	Gm14406	Gm14406-S-3712	FSM	0.0964865	0.0302337	0.0479447
PB.172482.841	Rpl13	Rpl13-S-841	NIC	0.113071	0.00612031	0.0182497
PB.9495.14	Ppp1r12a	Ppp1r12a-S-14	ISM	0.00612031	0.0479447	0.0420758
PB.123188.539	Kdm4a	Kdm4a-S-539	ISM	0.00306484	0.0182497	0.0566839
PB.137536.29	Gpn1	Gpn1-S-29	ISM	0.00306484	0.0710817	0.0624679
PB.98290.1384	Ubr1	Ubr1-S-1384	ISM	0.00306484	0.0391284	0.0595801
PB.59754.55	Nepro	Nepro-S-55	ISM	0.00306484	0.0152311	0.0242596
PB.15621.626	Fasn	Fasn-S-626	ISM	0.00306484	0.0450145	0.0479447
PB.146232.412	Sec13	Sec13-S-412	FSM	0.00306484	0.0272511	0.0450145
PB.129507.156	Pum1	Pum1-S-156	NNC	0	0.0182497	0.00612031
PB.58676.4	Crkl	Crkl-S-4	ISM	0.00306484	0.0242596	0.0653474
PB.114694.3	Plk4	Plk4-S-3	FSM	0	0.0361723	0
PB.167310.504	Cfdp1	Cfdp1-S-504	ISM	0.0767832	0.248731	0.253507
PB.126661.14	Smc2	Smc2-S-14	ISM	0.0824525	0.0767832	0.0566839
PB.144782.233	Kdm3a	Kdm3a-S-233	ISM	0.00612031	0.0796219	0.107574
PB.62398.371	Cbs	Cbs-S-371	ISM	0	0.0212592	0.00612031
PB.186564.151	Gnl3l	Gnl3l-S-151	ISM	0.0624679	0.246335	0.318078
PB.154308.2073	Nucb1	Nucb1-S-2073	ISM	0	0.0152311	0.0152311
PB.14939.508	Ccdc47	Ccdc47-S-508	ISM	0	0.0653474	0.0508662
PB.156754.936	Eif4g2	Eif4g2-S-936	ISM	0.0122034	0.204691	0.212167
PB.31758.1411	Hnrnpk	Hnrnpk-S-1411	ISM	0	0.0182497	0.0420758
PB.140326.20	Tchp	Tchp-S-20	ISM	0	0.0152311	0.0152311
PB.51476.126	Drosha	Drosha-S-126	ISM	0.00612031	0.0272511	0.0332074
PB.85102.210	Cep350	Cep350-S-210	ISM	0	0.00916647	0.0152311
PB.118646.197	Usp33	Usp33-S-197	FSM	0	0.00306484	0.0152311
PB.52783.27	Nsmce2	Nsmce2-S-27	ISM	0	0.0152311	0.0272511
PB.16598.89	Pus10	Pus10-S-89	ISM	0.00306484	0.00916647	0.0302337
PB.105342.19	Fam98b	Fam98b-S-19	ISM	0	0.0212592	0.0212592
PB.16582.50	Xpo1	Xpo1-S-50	ISM	0.00306484	0.0391284	0.0361723
PB.50843.669	Ddx23	Ddx23-S-669	NIC	0.00612031	0.00916647	0.0302337
PB.148432.34	Cald1	Cald1-S-34	ISM	0.00306484	0.0272511	0.0450145
PB.148274.519	Nrf1	Nrf1-S-519	ISM	0.00612031	0.0508662	0.0332074
PB.73834.66	Rpl17	Rpl17-S-66	NNC	0	0.0391284	0.0122034
PB.19769.11	Msl1	Msl1-S-11	FSM	0.00306484	0.0122034	0.0302337
PB.41424.43	Hmbox1	Hmbox1-S-43	ISM	0	0.00916647	0.0182497
PB.176316.477	Rnf7	Rnf7-S-477	FSM	0.00306484	0.0332074	0.0332074
PB.174491.301	Cul5	Cul5-S-301	NIC	0.00612031	0.0182497	0.0272511
PB.170134.761	Hmgb2	Hmgb2-S-761	ISM	0.0182497	0.115809	0.372406
PB.156879.227	Copb1	Copb1-S-227	ISM	0.00306484	0.0710817	0.0682187
PB.157404.1427	Eif3c	Eif3c-S-1427	FSM	0.0122034	0.169044	0.142781
PB.107462.561	Ncoa3	Ncoa3-S-561	ISM	0	0.0182497	0.0302337
PB.7790.1180	Herc4	Herc4-S-1180	ISM	0	0.0122034	0.0182497
PB.161768.128	Ipo7	Ipo7-S-128	ISM	0.0122034	0.0450145	0.0796219
PB.166312.361	Rad23a	Rad23a-S-361	FSM	0.00306484	0.0152311	0
PB.156984.989	Pik3c2a	Pik3c2a-S-989	ISM	0	0.0242596	0.0122034
PB.89279.10	Smarcal1	Smarcal1-S-10	ISM	0.0361723	0.00916647	0.00916647
PB.110970.101	Prcc	Prcc-S-101	ISM	0	0.0152311	0.00916647
PB.62080.275	Stub1	Stub1-S-275	ISM	0	0.0152311	0.00612031
PB.106022.7	Smox	Smox-S-7	ISM	0.267699	0.123977	0.194635
PB.137818.27	Lyar	Lyar-S-27	NIC	0.00612031	0.0212592	0.0182497
PB.171207.588	Farsa	Farsa-S-588	ISM	0	0.00612031	0.0152311
PB.25917.65	Smc6	Smc6-S-65	ISM	0	0.0152311	0.0242596
PB.118487.21	Znhit6	Znhit6-S-21	ISM	0.00916647	0.0182497	0.0182497
PB.142170.28	Brca2	Brca2-S-28	ISM	0.00306484	0.00612031	0.0182497
PB.32717.203	Rasa1	Rasa1-S-203	ISM	0.00612031	0.0908965	0.0653474
PB.115650.2	Nmd3	Nmd3-S-2	ISM	0.00612031	0.0653474	0.0964865
PB.159773.101	Gys1	Gys1-S-101	ISM	0	0.0122034	0.0152311
PB.74456.197	Sf3b2	Sf3b2-S-197	ISM	0	0.0152311	0.0182497
PB.8143.176	Specc1l	Specc1l-S-176	ISM	0	0.00306484	0.0152311
PB.148432.66	Cald1	Cald1-S-66	ISM	0	0.00916647	0.0152311
PB.131736.1147	Ppm1g	Ppm1g-S-1147	ISM	0.0152311	0.174215	0.204691
PB.134611.1882	Rnf10	Rnf10-S-1882	ISM	0	0.0212592	0.0272511
PB.30593.90	E2f3	E2f3-S-90	ISM	0	0.0361723	0.0332074
PB.62451.121	Zfp799	Zfp799-S-121	FSM	0.00306484	0.0361723	0.0242596
PB.154636.230	Nipa2	Nipa2-S-230	NIC	0.0152311	0	0
PB.155548.681	Iqgap1	Iqgap1-S-681	ISM	0.00306484	0.0537793	0.0595801
PB.79245.3	Sfr1	Sfr1-S-3	NNC	0.497499	0.879178	0.978559
PB.64018.162	Eif2ak2	Eif2ak2-S-162	ISM	0.00612031	0.0479447	0.0361723
PB.133066.96	Usp46	Usp46-S-96	NIC	0	0.00306484	0.0152311
PB.84205.494	Mdm4	Mdm4-S-494	NIC	0.00306484	0.0391284	0.0302337
PB.44021.346	Tkt	Tkt-S-346	ISM	0	0.0152311	0.00306484
PB.162270.342	Plk1	Plk1-S-342	ISM	0.0767832	0.397471	0.535945
PB.68273.1181	Rock1	Rock1-S-1181	ISM	0	0.00916647	0.0242596
PB.167290.301	Sf3b3	Sf3b3-S-301	ISM	0.00306484	0.00916647	0.0242596
PB.101870.27	Etl4	Etl4-S-27	ISM	0	0.00306484	0.0182497
PB.20045.24	Meioc	Meioc-S-24	FSM	0.00306484	0.0152311	0.0152311
PB.176716.297	Mapkapk3	Mapkapk3-S-297	ISM	0.00306484	0.0182497	0.0272511
PB.14570.964	Top2a	Top2a-S-964	ISM	0.0450145	0.181921	0.207189
PB.82262.241	Bard1	Bard1-S-241	ISM	0.0479447	0.255886	0.346697
PB.179753.25	Adpgk	Adpgk-S-25	FSM	0	0.0272511	0.0272511
PB.134517.178	Sart3	Sart3-S-178	ISM	0.0212592	0.0182497	0.0450145
PB.180115.21	Clpx	Clpx-S-21	ISM	0	0.00916647	0.0332074
PB.91130.31	Eif2d	Eif2d-S-31	ISM	0.00916647	0.0212592	0.0302337
PB.102474.488	Rpl12	Rpl12-S-488	ISM	0.0302337	0.0302337	0.0624679
PB.102304.500	Odf2	Odf2-S-500	NIC	0	0.0242596	0.0152311
PB.43692.122	Adk	Adk-S-122	ISM	0.00612031	0.0508662	0.0361723
PB.85973.446	Adss	Adss-S-446	ISM	0.0739365	0.313602	0.613667
PB.8600.805	Eef2	Eef2-S-805	ISM	0.0361723	0.33359	0.353186
PB.32069.532	Zfp87	Zfp87-S-532	FSM	0	0.00612031	0.0152311
PB.94856.233	Ehmt1	Ehmt1-S-233	ISM	0.00612031	0.0332074	0.0242596
PB.141007.648	Nipsnap2	Nipsnap2-S-648	ISM	0.00916647	0.00612031	0.0182497
PB.93742.7	D1Pas1	D1Pas1-S-7	FSM	0	0.0152311	0.0152311
PB.166833.800	Cnot1	Cnot1-S-800	ISM	0.00306484	0.0242596	0.0122034
PB.182243.85	Clasp2	Clasp2-S-85	NIC	0	0	0.0152311
PB.126204.39	Dnaja1	Dnaja1-S-39	FSM	0.0122034	0.0420758	0.0332074
PB.10711.178	Fignl1	Fignl1-S-178	FSM	0.00306484	0.0391284	0.0182497
PB.102740.144	Rabgap1	Rabgap1-S-144	ISM	0	0.00916647	0.0212592
PB.171962.369	Cog4	Cog4-S-369	ISM	0.00306484	0.0212592	0.0182497
PB.11396.146	Cfap36	Cfap36-S-146	ISM	0.107574	0.447755	0.521473
PB.85884.105	Fh1	Fh1-S-105	ISM	0.00306484	0.00916647	0.0182497
PB.131305.248	Dnajc2	Dnajc2-S-248	ISM	0.0767832	0.121262	0.121262
PB.90156.27	Ing5	Ing5-S-27	ISM	0.00306484	0.0182497	0.0182497
PB.51703.305	Myo10	Myo10-S-305	NNC	0.00612031	0.0537793	0.0595801
PB.180142.7	Herc1	Herc1-S-7	FSM	0	0.0796219	0.0710817
PB.81135.443	Rev1	Rev1-S-443	ISM	0	0.0152311	0.00916647
PB.153554.245	Hnrnpul1	Hnrnpul1-S-245	NNC	0	0.0152311	0.00612031
PB.101724.212	Mllt10	Mllt10-S-212	NIC	0.0908965	0.33359	0.374519
PB.171544.7	Coq9	Coq9-S-7	ISM	0	0.0152311	0.00916647
PB.123354.219	Zmpste24	Zmpste24-S-219	ISM	0.0450145	0.25826	0.27705
PB.69149.2180	Etf1	Etf1-S-2180	ISM	0.0242596	0.0710817	0.0992699
PB.59772.3	Atg3	Atg3-S-3	ISM	0.0152311	0.142781	0.17679
PB.124012.922	Srrm1	Srrm1-S-922	ISM	0.0152311	0.145438	0.251122
PB.134195.294	Zfp644	Zfp644-S-294	NNC	0.00306484	0.00916647	0.0152311
PB.129819.8	Hspg2	Hspg2-S-8	ISM	0	0.00612031	0.0152311
PB.97681.846	Caprin1	Caprin1-S-846	ISM	0	0.0122034	0.0152311
PB.3716.117	Scyl2	Scyl2-S-117	ISM	0	0.0152311	0.0182497
PB.61973.109	Kctd5	Kctd5-S-109	ISM	0	0.0152311	0.00306484
PB.84969.1660	Dhx9	Dhx9-S-1660	ISM	0.00306484	0.0182497	0.00612031
PB.136603.329	Slc25a40	Slc25a40-S-329	NIC	0.00306484	0.0152311	0.0361723
PB.13983.304	Aatf	Aatf-S-304	ISM	0	0.00306484	0.0361723
PB.66645.273	Uhrf1	Uhrf1-S-273	ISM	0	0.00612031	0.0212592
PB.93081.54	Copa	Copa-S-54	ISM	0	0.0242596	0.0450145
PB.29265.7	Dync1h1	Dync1h1-S-7	ISM	0	0.0391284	0.0653474
PB.149942.611	Immt	Immt-S-611	NIC	0	0.00916647	0.0152311
PB.15538.386	Eif4a3	Eif4a3-S-386	ISM	0.00612031	0.0624679	0.0508662
PB.180554.309	Ccpg1	Ccpg1-S-309	FSM	0.00916647	0.153369	0.158621
PB.111523.236	Wdr3	Wdr3-S-236	ISM	0	0.0242596	0.0272511
PB.159556.194	Gm37494	Gm37494-S-194	FSM	0.00612031	0.0302337	0.0391284
PB.146663.299	Ncapd2	Ncapd2-S-299	ISM	0	0.0242596	0.0182497
PB.137423.602	Dnajb6	Dnajb6-S-602	ISM	0.00612031	0.00306484	0.0152311
PB.13420.329	Pafah1b1	Pafah1b1-S-329	ISM	0.0122034	0.0739365	0.0880898
PB.10478.551	Ewsr1	Ewsr1-S-551	ISM	0.00916647	0.0122034	0.0272511
PB.81011.202	Uggt1	Uggt1-S-202	ISM	0	0.0272511	0.0272511
PB.108027.234	Zgpat	Zgpat-S-234	ISM	0	0.0152311	0.0182497
PB.167290.1749	Glg1	Glg1-S-1749	ISM	0	0.0242596	0.00916647
PB.44102.539	Parg	Parg-S-539	ISM	0	0.0182497	0.0302337
PB.130324.192	Lzic	Lzic-S-192	NIC	0	0.00306484	0.0152311
PB.126308.84	Creb3	Creb3-S-84	ISM	0	0.0212592	0.00612031
PB.171830.1657	Sntb2	Sntb2-S-1657	FSM	0.00306484	0.0302337	0.0212592
PB.108547.172	Armc1	Armc1-S-172	ISM	0.00306484	0.107574	0.0908965
PB.157462.184	Tial1	Tial1-S-184	ISM	0.00306484	0.00612031	0.0182497
PB.186876.181	Yy2	Yy2-S-181	FSM	0	0.0212592	0.0272511
PB.88748.13	Sgo2a	Sgo2a-S-13	ISM	0.0242596	0.231834	0.331389
PB.27932.6	Hif1a	Hif1a-S-6	ISM	0.00612031	0.0824525	0.104813
PB.62497.199	Brd2	Brd2-S-199	FSM	0.0182497	0.0710817	0.0908965
PB.82753.1755	Trip12	Trip12-S-1755	ISM	0.00612031	0.0595801	0.0450145
PB.175332.123	Fam81a	Fam81a-S-123	ISM	0	0.00916647	0.0272511
PB.88148.32	Tpp2	Tpp2-S-32	FSM	0	0.0152311	0.00306484
PB.137220.2	2900005J15Rik	2900005J15Rik-S-2	FSM	0	0.00306484	0.0182497
PB.45847.6	Nufip1	Nufip1-S-6	ISM	0.00306484	0.0272511	0.0332074
PB.19017.5	Lig3	Lig3-S-5	ISM	0.00306484	0.0152311	0.0653474
PB.101724.210	Mllt10	Mllt10-S-210	ISM	0.110326	0.279374	0.302322
PB.86443.483	Cenpf	Cenpf-S-483	ISM	0.00306484	0.0122034	0.0302337
PB.167290.2337	Rfwd3	Rfwd3-S-2337	ISM	0	0.0122034	0.0479447
PB.107503.3	Arfgef2	Arfgef2-S-3	ISM	0	0.0332074	0.0152311
PB.62447.99	Zfp871	Zfp871-S-99	FSM	0.00916647	0.0182497	0.0182497
PB.15324.249	Galk1	Galk1-S-249	ISM	0	0.0212592	0.00306484
PB.62949.3604	Hsp90ab1	Hsp90ab1-S-3604	NNC	0	0.0152311	0.0122034
PB.157198.398	Gga2	Gga2-S-398	ISM	0	0.0182497	0.0361723
PB.31335.251	Dek	Dek-S-251	ISM	0	0.00916647	0.0212592
PB.65015.596	Tcp1	Tcp1-S-596	ISM	0	0.0152311	0.0212592
PB.174310.198	Rexo2	Rexo2-S-198	ISM	0.00306484	0.00306484	0.0212592
PB.54058.62	Ncaph2	Ncaph2-S-62	ISM	0.00306484	0.0122034	0.0152311
PB.118802.37	Cryz	Cryz-S-37	ISM	0.00612031	0.121262	0.148089
PB.123138.1912	Akr1a1	Akr1a1-S-1912	ISM	0.00612031	0.0332074	0.0122034
PB.182404.120	Golga4	Golga4-S-120	NNC	0	0.0361723	0.0122034
PB.166959.201	Nae1	Nae1-S-201	ISM	0.00306484	0.0182497	0.0302337
PB.185267.42	Ercc6l	Ercc6l-S-42	FSM	0	0.0936954	0.134765
PB.85180.85	Rasal2	Rasal2-S-85	ISM	0.0122034	0.0653474	0.0479447
PB.118640.37	Fubp1	Fubp1-S-37	ISM	0	0.0212592	0.0508662
PB.109425.184	Sclt1	Sclt1-S-184	ISM	0	0.0152311	0.00612031
PB.140667.955	Gpn3	Gpn3-S-955	ISM	0.00306484	0.0710817	0.0739365
PB.134368.613	Ep400	Ep400-S-613	ISM	0.00916647	0.00612031	0.0182497
PB.55949.465	Apod	Apod-S-465	ISM	0.0122034	0.00306484	0.0212592
PB.65554.368	Pim1	Pim1-S-368	ISM	0	0.0182497	0.00916647
PB.140343.80	Rplp0	Rplp0-S-80	ISM	0.00612031	0.00916647	0.0272511
PB.135931.186	Radil	Radil-S-186	ISM	0.00612031	0.0852751	0.0450145
PB.3205.445	Mbd3	Mbd3-S-445	ISM	0	0.0152311	0.0212592
PB.41770.71	Gpalpp1	Gpalpp1-S-71	ISM	0.00306484	0.0212592	0.0182497
PB.102612.38	Hspa5	Hspa5-S-38	ISM	0	0.0796219	0.0450145
PB.38233.105	Trim23	Trim23-S-105	ISM	0	0.0302337	0.0242596
PB.80800.291	Phf3	Phf3-S-291	NIC	0.00612031	0.0152311	0.00612031
PB.70781.75	Katnal2	Katnal2-S-75	NNC	0	0.0182497	0.00916647
PB.22376.184	Ifrd1	Ifrd1-S-184	ISM	0.137444	0.803773	0.872786
PB.57717.246	Ltn1	Ltn1-S-246	ISM	0.00306484	0.0332074	0.0420758
PB.48315.373	Stk3	Stk3-S-373	ISM	0.00306484	0.0272511	0.0242596
PB.89417.8	Ankzf1	Ankzf1-S-8	ISM	0.00306484	0.00612031	0.0152311
PB.5216.577	Akap12	Akap12-S-577	NNC	0.00612031	0.0964865	0.0908965
PB.111264.890	Prpf3	Prpf3-S-890	ISM	0.00306484	0.0302337	0.0272511
PB.129763.1144	Luzp1	Luzp1-S-1144	ISM	0.0566839	0.179359	0.241525
PB.67232.9	Zbtb14	Zbtb14-S-9	FSM	0	0.0182497	0.00306484
PB.105431.8	Spint1	Spint1-S-8	ISM	0	0.00612031	0.0182497
PB.18696.1024	Ywhae	Ywhae-S-1024	FSM	0.00612031	0.212167	0.331389
PB.121509.74	Mpdz	Mpdz-S-74	ISM	0	0.0152311	0.0122034
PB.140345.9	Rab35	Rab35-S-9	FSM	0.00916647	0.17679	0.134765
PB.73162.237	Lmnb1	Lmnb1-S-237	ISM	0.00916647	0.192105	0.153369
PB.25176.1830	Hsp90aa1	Hsp90aa1-S-1830	ISM	0	0.0566839	0.0739365
PB.9399.28	Gm21293	Gm21293-S-28	FSM	0	0.0242596	0.0242596
PB.123627.352	Thrap3	Thrap3-S-352	NIC	0.00306484	0.0242596	0.0182497
PB.21594.160	Lpin1	Lpin1-S-160	ISM	0.00612031	0.0302337	0.0361723
PB.105832.4	Mrps5	Mrps5-S-4	ISM	0	0.00916647	0.0212592
PB.191377.81	Kdm5c	Kdm5c-S-81	ISM	0	0.0182497	0.0391284
PB.140803.34	Zfp664	Zfp664-S-34	NIC	0.00306484	0.00612031	0.0212592
PB.159850.49	Gtf2h1	Gtf2h1-S-49	ISM	0.00612031	0.0479447	0.0537793
PB.105456.164	Mga	Mga-S-164	ISM	0.00306484	0.0212592	0.0212592
PB.176134.351	Morf4l1	Morf4l1-S-351	ISM	0.229397	0.828205	1.17486
PB.117225.7	Psrc1	Psrc1-S-7	ISM	0.00612031	0.0361723	0.0566839
PB.51858.66	Mtdh	Mtdh-S-66	ISM	0	0.0479447	0.0361723
PB.177986.66	Mre11a	Mre11a-S-66	NIC	0	0.0152311	0.00306484
PB.152762.12	Med21	Med21-S-12	FSM	0	0	0.0272511
PB.130211.7729	Zfp982	Zfp982-S-7729	NNC	0.0272511	0.0479447	0.0302337
PB.4850.189	Helb	Helb-S-189	ISM	0.0391284	0.591828	0.553746
PB.129819.531	Usp48	Usp48-S-531	ISM	0	0.00306484	0.0152311
PB.5216.717	Akap12	Akap12-S-717	ISM	0.0152311	0.142781	0.194635
PB.86766.32	Atp6v1h	Atp6v1h-S-32	ISM	0.00916647	0.0479447	0.0824525
PB.24538.1848	Gm5039	Gm5039-S-1848	FSM	0.00306484	0.0361723	0.0332074
PB.24797.27	Rps6ka5	Rps6ka5-S-27	ISM	0	0.00916647	0.0212592
PB.137663.7	Add1	Add1-S-7	ISM	0.00306484	0.0152311	0.0332074
PB.138260.6	Zcchc4	Zcchc4-S-6	FSM	0.00306484	0.0152311	0.0182497
PB.128727.83	Eps15	Eps15-S-83	ISM	0	0.0361723	0.0302337
PB.65015.625	Tcp1	Tcp1-S-625	FSM	0	0.0302337	0.0332074
PB.36956.60	Nsun2	Nsun2-S-60	ISM	0.00612031	0.0182497	0.0242596
PB.176764.204	Dag1	Dag1-S-204	FSM	0	0.0739365	0.0508662
PB.149942.1259	Polr1a	Polr1a-S-1259	ISM	0	0.0302337	0.0332074
PB.89893.5	Dgkd	Dgkd-S-5	ISM	0.0420758	0.00612031	0.0272511
PB.33352.254	Srek1	Srek1-S-254	ISM	0.0767832	0.187026	0.214647
PB.53601.13	Eif3l	Eif3l-S-13	ISM	0.0450145	0.0796219	0.0936954
PB.83295.197	Ppip5k2	Ppip5k2-S-197	ISM	0.00612031	0.0152311	0.0152311
PB.148245.116	Calu	Calu-S-116	ISM	0.00306484	0.0122034	0.0242596
PB.18594.473	Mybbp1a	Mybbp1a-S-473	ISM	0	0.0122034	0.0182497
PB.181776.55	Amotl2	Amotl2-S-55	ISM	0.00306484	0.0450145	0.0508662
PB.139738.52	Cops4	Cops4-S-52	FSM	0.00916647	0.0182497	0.0242596
PB.86428.83	Kctd3	Kctd3-S-83	FSM	0	0.0152311	0.00612031
PB.28327.497	Rbm25	Rbm25-S-497	NIC	0.00916647	0.0122034	0.0152311
PB.151646.990	Hnrnpf	Hnrnpf-S-990	FSM	0	0.0212592	0.0182497
PB.88497.134	Osgepl1	Osgepl1-S-134	ISM	0.00916647	0.0361723	0.0852751
PB.34858.181	Hist1h1t	Hist1h1t-S-181	FSM	0	0.0152311	0.0242596
PB.137017.80	Tmem60	Tmem60-S-80	FSM	0.0479447	0.0624679	0.194635
PB.64018.675	Cebpz	Cebpz-S-675	ISM	0.0332074	0.161237	0.161237
PB.27431.7	Mia2	Mia2-S-7	ISM	0.0212592	0.166449	0.118539
PB.174392.280	Nkapd1	Nkapd1-S-280	FSM	0.00306484	0.0566839	0.0624679
PB.130211.4738	Zfp981	Zfp981-S-4738	NNC	0.00306484	0.0212592	0.0361723
PB.50604.158	Twf1	Twf1-S-158	ISM	0	0.0182497	0.0420758
PB.81620.214	Asdurf	Asdurf-S-214	FSM	0.0479447	0.380831	0.476755
PB.171264.1	Lonp2	Lonp2-S-1	ISM	0	0.0242596	0.0242596
PB.117625.46	Arhgap29	Arhgap29-S-46	ISM	0	0.0242596	0.0182497
PB.85993.702	Hnrnpu	Hnrnpu-S-702	ISM	0.0212592	0.431937	0.439877
PB.171988.314	Gabarapl2	Gabarapl2-S-314	FSM	0.0479447	0.33359	0.555509
PB.170625.7	Isyna1	Isyna1-S-7	ISM	0.0595801	0.00916647	0.0122034
PB.186197.260	Morf4l2	Morf4l2-S-260	FSM	0	0.00916647	0.0391284
PB.171207.437	Gadd45gip1	Gadd45gip1-S-437	FSM	0.0595801	0.33359	0.447755
PB.40885.1007	Acin1	Acin1-S-1007	ISM	0.00306484	0.0122034	0.0242596
PB.4642.327	Cnot2	Cnot2-S-327	ISM	0.00916647	0.0566839	0.0682187
PB.11762.484	Hmmr	Hmmr-S-484	ISM	0.00612031	0.0152311	0.0182497
PB.152400.4	Atf7ip	Atf7ip-S-4	ISM	0.0152311	0.0332074	0.102045
PB.135941.943	Actb	Actb-S-943	ISM	0.00916647	0.0992699	0.137444
PB.15832.276	Dbnl	Dbnl-S-276	ISM	0	0.0212592	0.0182497
PB.11061.114	Mdh1	Mdh1-S-114	ISM	0.00916647	0.123977	0.113071
PB.54836.962	Usp7	Usp7-S-962	ISM	0	0.0212592	0.00612031
PB.107900.594	Zfp965	Zfp965-S-594	FSM	0	0.0122034	0.0212592
PB.141007.124	Sfswap	Sfswap-S-124	ISM	0.00612031	0.0212592	0.0361723
PB.88823.264	Nop58	Nop58-S-264	NNC	0.00916647	0.00916647	0.0152311
PB.59915.3	Ift57	Ift57-S-3	ISM	0.00306484	0.0566839	0.0992699
PB.93509.7	Parp1	Parp1-S-7	ISM	0.00612031	0.0595801	0.0479447
PB.11854.94	Ublcp1	Ublcp1-S-94	ISM	0.0212592	0.0537793	0.0880898
PB.45895.1	Ccdc122	Ccdc122-S-1	ISM	0.0122034	0.0212592	0.00916647
PB.91243.81	Rbbp5	Rbbp5-S-81	ISM	0.00306484	0.0272511	0.0152311
PB.65900.209	Mdc1	Mdc1-S-209	FSM	0	0.0391284	0.0242596
PB.184453.412	Renbp	Renbp-S-412	ISM	0.00306484	0.0302337	0.0182497
PB.171323.9	Heatr3	Heatr3-S-9	ISM	0.00612031	0.0450145	0.0152311
PB.127046.9	Hsdl2	Hsdl2-S-9	ISM	0.00306484	0.00612031	0.0391284
PB.5216.1143	Akap12	Akap12-S-1143	NNC	0	0.0450145	0.00612031
PB.119386.71	Osgin2	Osgin2-S-71	FSM	0.00612031	0.0212592	0.0122034
PB.55003.250	Gspt1	Gspt1-S-250	ISM	0	0.0122034	0.0182497
PB.55002.544	Rsl1d1	Rsl1d1-S-544	ISM	0.246335	0.984311	0.975092
PB.9352.20	Cep290	Cep290-S-20	ISM	0.0420758	0.169044	0.163846
PB.180137.1582	Csnk1g1	Csnk1g1-S-1582	ISM	0	0.0122034	0.0212592
PB.151584.185	Washc2	Washc2-S-185	ISM	0.00306484	0.0361723	0.0537793
PB.14744.971	Ccdc43	Ccdc43-S-971	ISM	0	0.0152311	0.0332074
PB.72343.1483	Paip2	Paip2-S-1483	NIC	0.0508662	0.0450145	0.0332074
PB.22812.330	Hectd1	Hectd1-S-330	ISM	0	0.00612031	0.0152311
PB.32885.130	Zfyve16	Zfyve16-S-130	ISM	0	0.0212592	0.0212592
PB.44585.48	Ktn1	Ktn1-S-48	NIC	0.00612031	0.0332074	0.0361723
PB.114694.26	Plk4	Plk4-S-26	ISM	0	0.0152311	0.0122034
PB.6019.5	Stx7	Stx7-S-5	ISM	0	0.0152311	0.0152311
PB.136324.237	Hsph1	Hsph1-S-237	ISM	0	0.0391284	0.0566839
PB.95986.707	Prpf40a	Prpf40a-S-707	ISM	0.00306484	0.0212592	0.0479447
PB.27278.816	Srp54c	Srp54c-S-816	ISM	0.0122034	0.0796219	0.107574
PB.143554.539	Mkrn1	Mkrn1-S-539	ISM	0.0272511	0.306849	0.427944
PB.58676.1	Crkl	Crkl-S-1	ISM	0	0.00612031	0.0182497
PB.169213.186	Gsr	Gsr-S-186	ISM	0.0242596	0.0122034	0.0152311
PB.162026.7	Nucb2	Nucb2-S-7	ISM	0.00306484	0.0479447	0.00916647
PB.81108.65	Coa5	Coa5-S-65	FSM	0	0.0182497	0.00916647
PB.98725.238	Idh3b	Idh3b-S-238	ISM	0.00306484	0.0212592	0.0272511
PB.92128.172	Tor1aip2	Tor1aip2-S-172	FSM	0.00306484	0.0332074	0.0122034
PB.86270.17	Disp1	Disp1-S-17	NIC	0.0302337	0.00916647	0.00306484
PB.102304.1314	Gle1	Gle1-S-1314	ISM	0	0.0122034	0.0152311
PB.151516.8	Jagn1	Jagn1-S-8	FSM	0.00306484	0.0182497	0.0302337
PB.152508.4	Plekha5	Plekha5-S-4	NNC	0.107574	0.0391284	0.0653474
PB.51441.42	Zfr	Zfr-S-42	ISM	0.00306484	0.00306484	0.0242596
PB.99628.282	Ninl	Ninl-S-282	ISM	0.0212592	0.140116	0.222049
PB.80800.514	Phf3	Phf3-S-514	ISM	0.00306484	0.145438	0.0964865
PB.26154.11	Nol10	Nol10-S-11	ISM	0.00612031	0.0508662	0.0479447
PB.30353.255	Zscan26	Zscan26-S-255	FSM	0	0.0302337	0.0212592
PB.141014.21	Tmem248	Tmem248-S-21	ISM	0	0.0122034	0.0391284
PB.8638.168	Txnrd1	Txnrd1-S-168	ISM	0.00306484	0.0182497	0.0242596
PB.191371.140	Smc1a	Smc1a-S-140	ISM	0.0302337	0.229397	0.293206
PB.29444.8	Esyt2	Esyt2-S-8	ISM	0	0.0537793	0.0710817
PB.14677.1222	Brca1	Brca1-S-1222	ISM	0	0.00306484	0.0152311
PB.64086.215	Hnrnpll	Hnrnpll-S-215	ISM	0.00306484	0.0182497	0.0212592
PB.12138.575	Hnrnpab	Hnrnpab-S-575	ISM	0.0508662	0.295493	0.429943
PB.171808.969	Nfatc3	Nfatc3-S-969	ISM	0	0.0152311	0.00916647
PB.131696.503	Hadha	Hadha-S-503	ISM	0.0450145	0.361774	0.417889
PB.89258.7	Atic	Atic-S-7	FSM	0.00612031	0.0302337	0.0420758
PB.19547.9	Lrrc59	Lrrc59-S-9	ISM	0	0.155999	0.187026
PB.114693.3	Hspa4l	Hspa4l-S-3	ISM	0	0.0391284	0.0242596
PB.85692.124	Ufc1	Ufc1-S-124	FSM	0.0152311	0.0710817	0.0739365
PB.131253.589	Rsbn1l	Rsbn1l-S-589	ISM	0.0152311	0.00916647	0.0152311
PB.105420.76	Knl1	Knl1-S-76	FSM	0.00306484	0.0595801	0.0508662
PB.160626.90	Prc1	Prc1-S-90	ISM	0.0710817	0.519649	0.532347
PB.51230.6	Lifr	Lifr-S-6	ISM	0.00306484	0.0212592	0.0302337
PB.48288.443	Rpl30	Rpl30-S-443	FSM	0.0122034	0.00612031	0.0212592
PB.11453.865	Erlec1	Erlec1-S-865	ISM	0	0.0182497	0.00916647
PB.157406.125	Sephs2	Sephs2-S-125	FSM	0	0.0242596	0.00612031
PB.157622.417	Ctbp2	Ctbp2-S-417	ISM	0	0.0152311	0.0122034
PB.157404.5637	2022-09-01	Sept1-S-5637	FSM	0.00306484	0.0182497	0.0332074
PB.106417.27	Dtd1	Dtd1-S-27	ISM	0.00612031	0.0302337	0.0122034
PB.116958.30	Csde1	Csde1-S-30	ISM	0	0.0152311	0.00916647
PB.54667.321	Hnrnpa1	Hnrnpa1-S-321	ISM	0.0332074	0.382926	0.421923
PB.179777.220	Pkm	Pkm-S-220	ISM	0.00612031	0.224504	0.251122
PB.128901.12	Atpaf1	Atpaf1-S-12	ISM	0	0.0242596	0.0242596
PB.115618.298	Smc4	Smc4-S-298	ISM	0.0122034	0.0420758	0.0595801
PB.176764.211	Dag1	Dag1-S-211	NIC	0	0.0212592	0.00612031
PB.131305.271	Dnajc2	Dnajc2-S-271	NIC	0.00306484	0.0182497	0.00612031
PB.13420.270	Pafah1b1	Pafah1b1-S-270	ISM	0.0242596	0.0964865	0.0880898
PB.104280.5	Dnajc10	Dnajc10-S-5	ISM	0.0182497	0.262991	0.335786
PB.97760.298	Eif3m	Eif3m-S-298	FSM	0	0.0122034	0.0302337
PB.11020.158	Aftph	Aftph-S-158	ISM	0	0.0182497	0.0212592
PB.86270.264	Brox	Brox-S-264	ISM	0.00916647	0.0450145	0.0624679
PB.18594.72	Mybbp1a	Mybbp1a-S-72	FSM	0.00306484	0.0212592	0.0508662
PB.180535.19	Mns1	Mns1-S-19	ISM	0.0450145	0.0710817	0.0537793
PB.104400.19	Ssrp1	Ssrp1-S-19	ISM	0	0.0479447	0.0479447
PB.57270.128	4930453N24Rik	4930453N24Rik-S-128	ISM	0	0.0212592	0.0450145
PB.2472.1530	Ccar1	Ccar1-S-1530	ISM	0	0	0.0152311
PB.14789.488	Nsf	Nsf-S-488	ISM	0.00916647	0.0537793	0.0479447
PB.89084.4	Pikfyve	Pikfyve-S-4	ISM	0	0.0212592	0.0479447
PB.116508.372	Arnt	Arnt-S-372	ISM	0.00612031	0.0361723	0.0420758
PB.125400.78	Rbm12b2	Rbm12b2-S-78	FSM	0	0.00916647	0.0242596
PB.153554.386	Hnrnpul1	Hnrnpul1-S-386	ISM	0	0.00612031	0.0182497
PB.180115.3	Clpx	Clpx-S-3	FSM	0.00916647	0.0566839	0.0508662
PB.9399.69	Gm6763	Gm6763-S-69	FSM	0	0.0332074	0.0302337
PB.167022.214	Atp6v0d1	Atp6v0d1-S-214	ISM	0.00306484	0.0212592	0.0272511
PB.128211.24	Patj	Patj-S-24	ISM	0	0.00306484	0.0182497
PB.146283.229	Tamm41	Tamm41-S-229	ISM	0	0.0302337	0.0242596
PB.161518.685	Numa1	Numa1-S-685	NIC	0	0.0122034	0.0212592
PB.72661.613	Tcerg1	Tcerg1-S-613	ISM	0.00916647	0.0391284	0.0653474
PB.133377.120	Cenpc1	Cenpc1-S-120	ISM	0.00306484	0.0122034	0.0420758
PB.82753.1742	Trip12	Trip12-S-1742	ISM	0.0332074	0.253507	0.229397
PB.118244.4	Adh5	Adh5-S-4	ISM	0.0537793	0.603646	0.628512
PB.52931.67	Efr3a	Efr3a-S-67	ISM	0	0.0122034	0.0152311
PB.84845.174	Odr4	Odr4-S-174	ISM	0	0.0122034	0.0182497
PB.171131.4	Tbc1d9	Tbc1d9-S-4	ISM	0.00612031	0.0212592	0.0152311
PB.102612.13	Hspa5	Hspa5-S-13	ISM	0.00612031	0.171633	0.212167
PB.161768.1292	Swap70	Swap70-S-1292	FSM	0	0.0212592	0.0122034
PB.65169.1935	Riok2	Riok2-S-1935	NNC	0.00306484	0.0152311	0.00612031
PB.14677.1337	Brca1	Brca1-S-1337	ISM	0	0.0182497	0.0272511
PB.89420.5	Stk16	Stk16-S-5	FSM	0.27472	0.0767832	0.126685
PB.10235.269	Cdk4	Cdk4-S-269	FSM	0.00306484	0.00612031	0.0302337
PB.150194.161	Zfp638	Zfp638-S-161	ISM	0.0302337	0.0908965	0.153369
PB.152386.60	Gm8994	Gm8994-S-60	NNC	0	0.0242596	0.00612031
PB.174975.204	Fem1b	Fem1b-S-204	FSM	0.00306484	0.00916647	0.0212592
PB.112102.414	Mfsd14a	Mfsd14a-S-414	ISM	0	0.0242596	0.0302337
PB.15750.14	Sf3a1	Sf3a1-S-14	ISM	0.00306484	0.0391284	0.0391284
PB.25725.113	Atad2b	Atad2b-S-113	ISM	0.0479447	0.443824	0.378731
PB.185027.180	Las1l	Las1l-S-180	ISM	0.0710817	0.21712	0.243933
PB.140779.416	Kmt5a	Kmt5a-S-416	FSM	0.00612031	0.0450145	0.0710817
PB.163022.1033	Phrf1	Phrf1-S-1033	FSM	0.0242596	0.0152311	0.0479447
PB.37201.14	2210408I21Rik	2210408I21Rik-S-14	FSM	0.0566839	0.0242596	0.0152311
PB.25917.45	Smc6	Smc6-S-45	ISM	0	0.0182497	0.0332074
PB.138052.6	Ncapg	Ncapg-S-6	ISM	0.0302337	0.239111	0.297774
PB.123769.122	Kpna6	Kpna6-S-122	ISM	0	0.00612031	0.0212592
PB.104401.12	Tnks1bp1	Tnks1bp1-S-12	NIC	0	0.0212592	0.0212592
PB.164123.1494	Ash2l	Ash2l-S-1494	ISM	0	0.0242596	0.0212592
PB.27278.72	Srp54a	Srp54a-S-72	ISM	0.0212592	0.134765	0.187026
PB.55275.272	Ppil2	Ppil2-S-272	ISM	0	0.00916647	0.0272511
PB.96745.356	Sp3	Sp3-S-356	ISM	0	0.0302337	0.0182497
PB.96745.337	Sp3	Sp3-S-337	ISM	0	0.0182497	0.00612031
PB.46288.289	Pibf1	Pibf1-S-289	ISM	0	0.0182497	0.0122034
PB.118071.42	Ppa2	Ppa2-S-42	ISM	0.00612031	0.00612031	0.0182497
PB.167906.311	Nup133	Nup133-S-311	ISM	0	0.0122034	0.0182497
PB.124632.239	Kif1b	Kif1b-S-239	ISM	0	0.0152311	0.00306484
PB.103794.170	Ppig	Ppig-S-170	NIC	0.0182497	0.129386	0.129386
PB.61104.36	Ttc3	Ttc3-S-36	ISM	0	0.0182497	0.0212592
PB.155429.293	Mfge8	Mfge8-S-293	ISM	0	0.0122034	0.0212592
PB.179331.9	Rdx	Rdx-S-9	ISM	0.657556	0.796879	0.687326
PB.18594.82	Mybbp1a	Mybbp1a-S-82	FSM	0.00306484	0.0242596	0.0272511
PB.13801.162	Utp6	Utp6-S-162	ISM	0	0.0332074	0.0450145
PB.134322.219	Gak	Gak-S-219	ISM	0.00612031	0.00612031	0.0212592
PB.147184.364	Bcat1	Bcat1-S-364	ISM	0	0.0212592	0.0361723
PB.50846.1965	Tuba1a	Tuba1a-S-1965	FSM	0	0.0361723	0.0361723
PB.125915.506	Mdn1	Mdn1-S-506	ISM	0.00612031	0.0936954	0.0992699
PB.163028.432	Taldo1	Taldo1-S-432	ISM	0	0.00916647	0.0242596
PB.150664.7	Ccdc174	Ccdc174-S-7	FSM	0.0152311	0.0479447	0.0508662
PB.44178.1003	Wapl	Wapl-S-1003	ISM	0.00306484	0.0302337	0.00306484
PB.43152.15	Flnb	Flnb-S-15	ISM	0.00612031	0.142781	0.163846
PB.158287.77	U2af2	U2af2-S-77	ISM	0.00612031	0.0796219	0.0739365
PB.144782.260	Kdm3a	Kdm3a-S-260	ISM	0	0.0272511	0.0182497
PB.139997.12	Pigg	Pigg-S-12	ISM	0	0.0152311	0.00612031
PB.54651.188	Eif4b	Eif4b-S-188	ISM	0.00916647	0.0653474	0.0332074
PB.93509.9	Parp1	Parp1-S-9	ISM	0.0420758	0.187026	0.231834
PB.141734.44	Wipi2	Wipi2-S-44	ISM	0	0	0.0152311
PB.153063.632	Zscan4e	Zscan4e-S-632	ISM	0	0.0122034	0.0152311
PB.112610.173	Aimp1	Aimp1-S-173	NNC	0.0152311	0.0420758	0.0595801
PB.142170.26	Brca2	Brca2-S-26	ISM	0	0.0152311	0.0182497
PB.118640.158	Fubp1	Fubp1-S-158	ISM	0	0.00306484	0.0212592
PB.123318.228	Ctps	Ctps-S-228	ISM	0.00306484	0.0152311	0.0182497
PB.37625.486	Ap3b1	Ap3b1-S-486	ISM	0	0.00612031	0.0182497
PB.146769.879	Fkbp4	Fkbp4-S-879	ISM	0.00306484	0.0242596	0.0302337
PB.91384.1701	Kdm5b	Kdm5b-S-1701	ISM	0	0.0332074	0.0302337
PB.104400.35	Ssrp1	Ssrp1-S-35	ISM	0	0.0302337	0.0332074
PB.135025.877	Anapc5	Anapc5-S-877	ISM	0.0122034	0.0739365	0.0653474
PB.115039.169	Supt20	Supt20-S-169	NIC	0.00306484	0.00612031	0.0212592
PB.143407.212	Cnot4	Cnot4-S-212	ISM	0	0.0152311	0.0122034
PB.105456.158	Mga	Mga-S-158	ISM	0.00306484	0.0624679	0.0880898
PB.83876.429	Actr3	Actr3-S-429	ISM	0.00612031	0.113071	0.132079
PB.141593.164	Eif3b	Eif3b-S-164	ISM	0.0361723	0.199676	0.340165
PB.89843.15	Psmd1	Psmd1-S-15	ISM	0.00306484	0.0796219	0.0595801
PB.3064.462	Pfkl	Pfkl-S-462	ISM	0	0.0152311	0.0242596
PB.8638.142	Txnrd1	Txnrd1-S-142	ISM	0.0122034	0.0566839	0.0653474
PB.54836.987	Usp7	Usp7-S-987	ISM	0.00916647	0.121262	0.153369
PB.158216.259	Cnot3	Cnot3-S-259	ISM	0.00916647	0.0739365	0.0653474
PB.54770.146	Eef2kmt	Eef2kmt-S-146	NIC	0.0361723	0	0.00612031
PB.157967.59	Zfp941	Zfp941-S-59	FSM	0	0.00916647	0.0182497
PB.18623.12	Ncbp3	Ncbp3-S-12	ISM	0.0182497	0.0964865	0.129386
PB.168081.878	Rbm34	Rbm34-S-878	FSM	0.0152311	0.0450145	0.0391284
PB.128212.73	L1td1	L1td1-S-73	FSM	0.00916647	0.202187	0.251122
PB.3064.449	Pfkl	Pfkl-S-449	ISM	0	0.00916647	0.0152311
PB.65134.10	Chd1	Chd1-S-10	ISM	0.0242596	0.0824525	0.0964865
PB.91829.464	Tpr	Tpr-S-464	ISM	0	0.0272511	0.0242596
PB.89876.493	Gigyf2	Gigyf2-S-493	ISM	0.0122034	0.187026	0.163846
PB.137151.6	Nupl2	Nupl2-S-6	ISM	0	0.00916647	0.0302337
PB.48866.534	Eif3e	Eif3e-S-534	ISM	0.0332074	0.202187	0.192105
PB.62176.38	Uqcc2	Uqcc2-S-38	FSM	0.0122034	0.0272511	0.0391284
PB.41054.298	Pspc1	Pspc1-S-298	ISM	0	0.00916647	0.0182497
PB.185419.1046	Atrx	Atrx-S-1046	FSM	0	0.0182497	0.0212592
PB.86271.189	Mia3	Mia3-S-189	FSM	0	0.00306484	0.0182497
PB.153769.603	Actn4	Actn4-S-603	ISM	0	0.0182497	0.00612031
PB.99210.491	Esf1	Esf1-S-491	ISM	0.0152311	0.00306484	0.00306484
PB.157516.662	Nsmce4a	Nsmce4a-S-662	ISM	0.0182497	0.0122034	0.00306484
PB.84962.363	Smg7	Smg7-S-363	NNC	0.00306484	0.0212592	0.0152311
PB.86271.209	Mia3	Mia3-S-209	ISM	0	0.00306484	0.0242596
PB.3083.449	Rrp1	Rrp1-S-449	ISM	0.00306484	0.0391284	0.0302337
PB.82001.736	Ndufs1	Ndufs1-S-736	NIC	0.00916647	0.0182497	0.0450145
PB.57917.91	Rcan1	Rcan1-S-91	FSM	0.00306484	0.0302337	0.0152311
PB.156257.94	Serpinh1	Serpinh1-S-94	ISM	0	0.0122034	0.0152311
PB.50833.160	Senp1	Senp1-S-160	ISM	0.0272511	0.0710817	0.0710817
PB.14939.451	Ccdc47	Ccdc47-S-451	ISM	0.0242596	0.239111	0.241525
PB.151895.26	Necap1	Necap1-S-26	ISM	0.00306484	0.0242596	0.0212592
PB.167975.163	2810004N23Rik	2810004N23Rik-S-163	ISM	0.407732	0.657556	0.729642
PB.14056.490	Ints2	Ints2-S-490	ISM	0	0.00612031	0.0182497
PB.115487.9	Tiparp	Tiparp-S-9	NIC	0	0.0332074	0.0242596
PB.51441.144	Zfr	Zfr-S-144	ISM	0	0.00916647	0.0152311
PB.70446.92	Fam210a	Fam210a-S-92	ISM	0.00612031	0.113071	0.148089
PB.135025.923	Anapc5	Anapc5-S-923	ISM	0.0653474	0.606998	0.566021
PB.43697.353	Vdac2	Vdac2-S-353	ISM	0.0122034	0.0332074	0.0537793
PB.188145.9	Nkap	Nkap-S-9	ISM	0.00306484	0.0242596	0.0212592
PB.133583.137	Nup54	Nup54-S-137	FSM	0.00306484	0.0242596	0.0212592
PB.120148.208	Topors	Topors-S-208	FSM	0.0122034	0.17679	0.231834
PB.69295.240	Gnpda1	Gnpda1-S-240	ISM	0.00612031	0.0824525	0.0992699
PB.83216.415	Hdlbp	Hdlbp-S-415	ISM	0	0.0212592	0.0332074
PB.115551.759	Mlf1	Mlf1-S-759	ISM	0	0.0122034	0.0212592
PB.51703.357	Myo10	Myo10-S-357	NNC	0.00306484	0.0182497	0.0272511
PB.89271.699	Xrcc5	Xrcc5-S-699	ISM	0.00306484	0.0122034	0.0152311
PB.181570.295	Copb2	Copb2-S-295	ISM	0	0.0152311	0.0182497
PB.33747.422	Mtrex	Mtrex-S-422	FSM	0.00306484	0.179359	0.163846
PB.128672.804	Orc1	Orc1-S-804	ISM	0	0.0152311	0.0302337
PB.81803.819	Orc2	Orc2-S-819	ISM	0	0.0122034	0.0152311
PB.188068.100	Dock11	Dock11-S-100	ISM	0	0.00612031	0.0152311
PB.84004.468	Mcm6	Mcm6-S-468	ISM	0.00612031	0.161237	0.161237
PB.40820.609	Hnrnpc	Hnrnpc-S-609	NIC	0.00306484	0.0595801	0.0212592
PB.186703.121	Shroom2	Shroom2-S-121	ISM	0	0.0152311	0
PB.104888.18	Fbxo3	Fbxo3-S-18	ISM	0	0.00916647	0.0152311
PB.104532.9	Ckap5	Ckap5-S-9	ISM	0.0242596	0.0936954	0.0908965
PB.185267.58	Ercc6l	Ercc6l-S-58	FSM	0.00306484	0.0152311	0.0212592
PB.10661.98	Hus1	Hus1-S-98	ISM	0	0.00612031	0.0152311
PB.166557.123	Rpgrip1l	Rpgrip1l-S-123	ISM	0.00612031	0.0508662	0.0824525
PB.154037.427	Uri1	Uri1-S-427	ISM	0.0653474	0.433928	0.411807
PB.151796.1002	Kdm5a	Kdm5a-S-1002	ISM	0.00612031	0.0537793	0.0537793
PB.87749.1359	Dst	Dst-S-1359	FSM	0	0.0479447	0.0595801
PB.95986.628	Prpf40a	Prpf40a-S-628	ISM	0.00306484	0.0852751	0.104813
PB.35870.36	Jarid2	Jarid2-S-36	NIC	0.00306484	0.0302337	0.0566839
PB.44585.56	Ktn1	Ktn1-S-56	ISM	0	0.00306484	0.0152311
PB.55331.705	Dgcr8	Dgcr8-S-705	ISM	0.00612031	0.0624679	0.0710817
PB.172538.159	Gnpat	Gnpat-S-159	ISM	0	0.0152311	0.0152311
PB.64534.119	Gm10184	Gm10184-S-119	FSM	0.00612031	0.0653474	0.0992699
PB.48213.430	Cct5	Cct5-S-430	ISM	0.00306484	0.0122034	0.0212592
PB.151501.323	Setd5	Setd5-S-323	NIC	0	0.0242596	0.0242596
PB.148398.39	Exoc4	Exoc4-S-39	ISM	0.00306484	0.0450145	0.0332074
PB.182527.6	Rpl14	Rpl14-S-6	FSM	0.0391284	0.0767832	0.0624679
PB.13504.198	Glod4	Glod4-S-198	ISM	0	0.0212592	0.0212592
PB.161518.110	Anapc15	Anapc15-S-110	FSM	0	0.0272511	0.0566839
PB.20291.1109	Psmd12	Psmd12-S-1109	FSM	0.0824525	0.0242596	0.0767832
PB.23076.138	Sec23a	Sec23a-S-138	ISM	0	0.0152311	0.0152311
PB.62488.69	H2-Ke6	H2-Ke6-S-69	NIC	0.0152311	0	0.00306484
PB.32286.314	Zfp825	Zfp825-S-314	FSM	0.0420758	0.0182497	0.0182497
PB.8776.66	Pwp1	Pwp1-S-66	ISM	0.00306484	0.00612031	0.0212592
PB.149942.526	Immt	Immt-S-526	ISM	0.0653474	0.579867	0.623588
PB.129163.141	Trit1	Trit1-S-141	FSM	0	0.00916647	0.0182497
PB.181570.2	Copb2	Copb2-S-2	ISM	0.0182497	0.222049	0.214647
PB.50843.699	Ddx23	Ddx23-S-699	NIC	0	0.0242596	0.0332074
PB.93512.524	Lefty1	Lefty1-S-524	ISM	0	0.0242596	0.00916647
PB.51040.360	Cbx5	Cbx5-S-360	ISM	0.00306484	0.0332074	0.0624679
PB.177601.1	Kbtbd3	Kbtbd3-S-1	FSM	0.550211	0.0880898	0.0739365
PB.72661.1	Tcerg1	Tcerg1-S-1	ISM	0.123977	0.0992699	0.153369
PB.165590.189	Ddx49	Ddx49-S-189	FSM	0	0.0182497	0.0182497
PB.11020.172	Aftph	Aftph-S-172	ISM	0	0.0272511	0.00306484
PB.49750.54	Zc3h3	Zc3h3-S-54	ISM	0.0332074	0.0537793	0.0420758
PB.93509.28	Parp1	Parp1-S-28	ISM	0	0	0.0152311
PB.44123.5	Ercc6	Ercc6-S-5	ISM	0.00612031	0.0272511	0.0272511
PB.25797.252	Hs1bp3	Hs1bp3-S-252	FSM	0	0.0152311	0.00306484
PB.4610.243	Tbc1d15	Tbc1d15-S-243	ISM	0.204691	1.04225	1.039
PB.40820.641	Hnrnpc	Hnrnpc-S-641	ISM	0	0.0152311	0.0152311
PB.180415.85	Myo1e	Myo1e-S-85	ISM	0	0.0391284	0.0391284
PB.14645.405	Rab5c	Rab5c-S-405	ISM	0	0	0.0182497
PB.108040.19	Prpf6	Prpf6-S-19	ISM	0.00306484	0.0152311	0.00306484
PB.121847.443	Plin2	Plin2-S-443	ISM	0	0.0152311	0.00916647
PB.82448.141	Usp37	Usp37-S-141	ISM	0.00306484	0.00612031	0.0242596
PB.66280.270	Ccnd3	Ccnd3-S-270	FSM	0	0.0152311	0.0152311
PB.62620.1212	Tubb5	Tubb5-S-1212	FSM	0.00306484	0.0212592	0.0391284
PB.91384.1649	Kdm5b	Kdm5b-S-1649	ISM	0.00612031	0.17679	0.189569
PB.131921.525	Tnip2	Tnip2-S-525	FSM	0	0.0332074	0.0272511
PB.29307.1269	Klc1	Klc1-S-1269	ISM	0	0	0.0152311
PB.29813.115	Zmynd11	Zmynd11-S-115	NIC	0	0.0152311	0.0182497
PB.82973.146	Hjurp	Hjurp-S-146	FSM	0	0.0152311	0.0272511
PB.170860.28	Hmgxb4	Hmgxb4-S-28	ISM	0.0212592	0.0537793	0.0796219
PB.140789.19	Tmed2	Tmed2-S-19	ISM	0.0122034	0.140116	0.126685
PB.143888.214	Igf2bp3	Igf2bp3-S-214	ISM	0.0122034	0.0332074	0.0302337
PB.57211.133	Arl13b	Arl13b-S-133	FSM	0	0.0420758	0.0420758
PB.89843.35	Psmd1	Psmd1-S-35	ISM	0.00916647	0.0212592	0.0332074
PB.187858.383	Uba1	Uba1-S-383	ISM	0.00306484	0.0242596	0.0420758
PB.135004.801	Atp2a2	Atp2a2-S-801	ISM	0.00612031	0.115809	0.0508662
PB.141898.894	Zfp655	Zfp655-S-894	FSM	0.00306484	0.0332074	0.0272511
PB.56854.177	Dzip3	Dzip3-S-177	ISM	0.0152311	0.0964865	0.0739365
PB.95442.203	Psmd5	Psmd5-S-203	ISM	0.0152311	0.129386	0.163846
PB.115650.26	Nmd3	Nmd3-S-26	ISM	0	0.0391284	0.0302337
PB.138040.415	Med28	Med28-S-415	FSM	0	0	0.0152311
PB.55275.282	Ppil2	Ppil2-S-282	ISM	0.0212592	0.187026	0.239111
PB.21465.311	Ddx1	Ddx1-S-311	ISM	0.00306484	0.0272511	0.0212592
PB.37259.5	Arrdc3	Arrdc3-S-5	ISM	0.00306484	0.0479447	0.0242596
PB.65865.1161	Bag6	Bag6-S-1161	FSM	0.00306484	0.0332074	0.0272511
PB.100766.156	Aurka	Aurka-S-156	FSM	0	0.0242596	0.0332074
PB.166653.387	Nudt21	Nudt21-S-387	ISM	0.00612031	0.00916647	0.0152311
PB.8638.135	Txnrd1	Txnrd1-S-135	ISM	0.113071	0.626873	0.774494
PB.55643.181	Rfc4	Rfc4-S-181	ISM	0.0122034	0.121262	0.214647
PB.76911.195	Ccdc186	Ccdc186-S-195	ISM	0	0.0212592	0.0212592
PB.120274.136	Tpm2	Tpm2-S-136	ISM	0.00612031	0.0272511	0.0508662
PB.132457.330	Dhx15	Dhx15-S-330	ISM	0.00612031	0.0880898	0.145438
PB.155096.33	Synm	Synm-S-33	FSM	0	0.0212592	0.0272511
PB.41877.113	Akap11	Akap11-S-113	ISM	0	0.0122034	0.0152311
PB.28327.543	Rbm25	Rbm25-S-543	NIC	0.0182497	0.00306484	0
PB.172714.300	Itgb1	Itgb1-S-300	ISM	0	0.0182497	0.0182497
PB.14591.211	Smarce1	Smarce1-S-211	ISM	0.00306484	0.0992699	0.107574
PB.171212.79	Orc6	Orc6-S-79	NIC	0.0122034	0.0595801	0.0508662
PB.130612.123	Cdk11b	Cdk11b-S-123	NIC	0	0.0152311	0.0242596
PB.58910.10	Senp2	Senp2-S-10	ISM	0.00916647	0.107574	0.0302337
PB.130873.200	Dmtf1	Dmtf1-S-200	ISM	0.00612031	0.102045	0.0880898
PB.8638.134	Txnrd1	Txnrd1-S-134	ISM	0.370289	1.62882	1.73443
PB.151889.417	Nanog	Nanog-S-417	FSM	0.0152311	0.0420758	0.0332074
PB.7238.142	Dcbld1	Dcbld1-S-142	ISM	0.00306484	0.166449	0.171633
PB.124632.737	Ube4b	Ube4b-S-737	ISM	0	0.0182497	0.0152311
PB.159646.570	Zfp936	Zfp936-S-570	FSM	0.0880898	0.0479447	0.0595801
PB.147137.376	Ldhb	Ldhb-S-376	ISM	0.00916647	0.00916647	0.0302337
PB.106509.340	Xrn2	Xrn2-S-340	ISM	0.00916647	0.0182497	0.0332074
PB.119334.218	Otud6b	Otud6b-S-218	ISM	0.00916647	0.0302337	0.0332074
PB.140333.1187	Coq5	Coq5-S-1187	ISM	0.0182497	0.00306484	0.0152311
PB.10539.277	Tbrg4	Tbrg4-S-277	ISM	0	0.0152311	0.00612031
PB.21450.297	Mycn	Mycn-S-297	FSM	0.00306484	0.0332074	0.0182497
PB.4659.2267	Cpsf6	Cpsf6-S-2267	ISM	0	0.00612031	0.0182497
PB.141007.865	Cct6a	Cct6a-S-865	NNC	0.00306484	0.0212592	0.0242596
PB.31329.403	Nup153	Nup153-S-403	ISM	0.00306484	0.0739365	0.0824525
PB.120970.191	Ecpas	Ecpas-S-191	ISM	0	0.00916647	0.0152311
PB.118386.8	Gtf2b	Gtf2b-S-8	ISM	0.00306484	0.0420758	0.0710817
PB.141593.182	Eif3b	Eif3b-S-182	ISM	0.00612031	0.0302337	0.0537793
PB.123905.1976	Hmgn2	Hmgn2-S-1976	FSM	0.0479447	0.0302337	0.0508662
PB.119026.161	Impad1	Impad1-S-161	ISM	0	0.00916647	0.0272511
PB.115244.286	Eif2a	Eif2a-S-286	ISM	0.0537793	0.189569	0.267699
PB.58414.33	Atf7ip2	Atf7ip2-S-33	NIC	0	0.0152311	0.00916647
PB.131915.306	Nelfa	Nelfa-S-306	ISM	0	0.0182497	0.0508662
PB.130631.34	Sdf4	Sdf4-S-34	ISM	0.00306484	0.0479447	0.0653474
PB.126204.73	Dnaja1	Dnaja1-S-73	NIC	0	0.00916647	0.0182497
PB.146426.240	Ankrd26	Ankrd26-S-240	ISM	0.00306484	0.0272511	0.0332074
PB.31947.225	Zfp367	Zfp367-S-225	ISM	0	0.00306484	0.0182497
PB.118884.109	Ankrd13c	Ankrd13c-S-109	ISM	0.00306484	0.0537793	0.0272511
PB.135070.1235	Rsrc2	Rsrc2-S-1235	FSM	0.0212592	0.0272511	0.0272511
PB.180790.21	Gsta4	Gsta4-S-21	FSM	0.0152311	0.115809	0.0908965
PB.97483.258	Api5	Api5-S-258	ISM	0.00306484	0.0908965	0.0624679
PB.139518.42	2022-09-11	Sept11-S-42	ISM	0.0122034	0.145438	0.181921
PB.87749.116	Rab23	Rab23-S-116	FSM	0.00306484	0.0242596	0.0332074
PB.49750.828	Eef1d	Eef1d-S-828	FSM	0	0.0152311	0.00612031
PB.118640.51	Fubp1	Fubp1-S-51	ISM	0.00306484	0.0824525	0.115809
PB.162795.8	Bccip	Bccip-S-8	FSM	0	0.00612031	0.0152311
PB.118123.37	Slc9b1	Slc9b1-S-37	NIC	0.0420758	0.260628	0.236691
PB.68273.1169	Rock1	Rock1-S-1169	ISM	0.00612031	0.0182497	0.00306484
PB.44178.1002	Wapl	Wapl-S-1002	ISM	0	0.0361723	0.0242596
PB.160071.2	Ube3a	Ube3a-S-2	ISM	0	0.0479447	0.0420758
PB.145485.1	Iqsec1	Iqsec1-S-1	FSM	0.00612031	0.0479447	0.0361723
PB.17474.207	Gfpt2	Gfpt2-S-207	ISM	0	0.00612031	0.0152311
PB.170860.44	Hmgxb4	Hmgxb4-S-44	ISM	0	0.0450145	0.0450145
PB.129842.1	Hp1bp3	Hp1bp3-S-1	ISM	0	0.0242596	0.0391284
PB.185072.48	Ophn1	Ophn1-S-48	ISM	0	0.00916647	0.0152311
PB.150440.6	Ruvbl1	Ruvbl1-S-6	ISM	0.0152311	0.102045	0.134765
PB.110587.251	Pdcd10	Pdcd10-S-251	ISM	0	0.0302337	0.0479447
PB.89520.46	Utp14b	Utp14b-S-46	FSM	0.00612031	0.0908965	0.0272511
PB.402.612	Utrn	Utrn-S-612	ISM	0.00306484	0.0152311	0.00612031
PB.145391.399	Mcm2	Mcm2-S-399	ISM	0	0.0182497	0.0450145
PB.98307.1912	Spg11	Spg11-S-1912	ISM	0.00306484	0.0508662	0.0450145
PB.13801.217	Utp6	Utp6-S-217	FSM	0	0.00916647	0.0182497
PB.23220.887	Mis18bp1	Mis18bp1-S-887	NNC	0.00612031	0.0122034	0.0212592
PB.14417.394	Kpnb1	Kpnb1-S-394	ISM	0.00612031	0.0710817	0.0624679
PB.175844.527	Phip	Phip-S-527	ISM	0.00306484	0.118539	0.110326
PB.129505.15	Snrnp40	Snrnp40-S-15	ISM	0.00306484	0.00916647	0.0152311
PB.11453.891	Erlec1	Erlec1-S-891	ISM	0	0.0450145	0.0566839
PB.18409.18	Aurkb	Aurkb-S-18	ISM	0	0.0152311	0.0242596
PB.139991.864	Mtf2	Mtf2-S-864	NNC	0	0.0212592	0.0242596
PB.9352.92	Cep290	Cep290-S-92	ISM	0	0.0242596	0.0420758
PB.67853.20	Msh6	Msh6-S-20	ISM	0.00612031	0.0796219	0.102045
PB.12260.220	Rad50	Rad50-S-220	ISM	0	0	0.0182497
PB.105798.93	Usp8	Usp8-S-93	ISM	0.00306484	0.0272511	0.0479447
PB.62080.277	Stub1	Stub1-S-277	ISM	0.0420758	0.415866	0.445791
PB.182075.3	Impdh2	Impdh2-S-3	ISM	0.0182497	0.0824525	0.0682187
PB.157198.826	Ndufab1	Ndufab1-S-826	FSM	0.00306484	0.0391284	0.0537793
PB.55003.305	Gspt1	Gspt1-S-305	ISM	0.760244	1.64967	1.69295
PB.48914.118	Nudcd1	Nudcd1-S-118	ISM	0	0.0391284	0.00612031
PB.137531.5	Zfp512	Zfp512-S-5	ISM	0	0.0152311	0.00612031
PB.129094.106	Rims3	Rims3-S-106	ISM	0	0.0272511	0.00916647
PB.95452.234	Rab14	Rab14-S-234	ISM	0.00612031	0.0212592	0.0420758
PB.183466.148	Upf3b	Upf3b-S-148	NIC	0	0.0152311	0.00306484
PB.77319.879	Sf1	Sf1-S-879	ISM	0.00306484	0.0796219	0.166449
PB.145750.315	Tmf1	Tmf1-S-315	ISM	0	0.0272511	0.0272511
PB.67646.84	Eml4	Eml4-S-84	ISM	0.00306484	0.0182497	0.0152311
PB.161451.10	Rab6a	Rab6a-S-10	ISM	0.00916647	0.0332074	0.0682187
PB.111365.93	Gpr89	Gpr89-S-93	ISM	0	0.0182497	0.0182497
PB.94932.64	Qsox2	Qsox2-S-64	ISM	0.0122034	0.0566839	0.0624679
PB.98428.342	Cops2	Cops2-S-342	ISM	0.00916647	0.0122034	0.0361723
PB.106825.19	Mapre1	Mapre1-S-19	ISM	0	0.0332074	0.0272511
PB.62620.1201	Tubb5	Tubb5-S-1201	FSM	0	0.0152311	0.0122034
PB.187117.284	Txlng	Txlng-S-284	ISM	0.00306484	0.0624679	0.0908965
PB.76021.101	Noc3l	Noc3l-S-101	ISM	0.0242596	0.158621	0.158621
PB.28327.572	Rbm25	Rbm25-S-572	NIC	0.0302337	0.00306484	0
PB.126600.87	Rnf20	Rnf20-S-87	ISM	0.00306484	0.0152311	0.0122034
PB.174975.221	Fem1b	Fem1b-S-221	FSM	0.00916647	0.0479447	0.0710817
PB.77470.778	Eef1g	Eef1g-S-778	ISM	0.0332074	0.243933	0.270045
PB.162502.15	Mapk3	Mapk3-S-15	ISM	0	0.0182497	0.0152311
PB.70811.603	Haus1	Haus1-S-603	ISM	0.00612031	0.0391284	0.0242596
PB.66645.135	Uhrf1	Uhrf1-S-135	ISM	0	0.0182497	0.0272511
PB.115552.9	Gfm1	Gfm1-S-9	ISM	0	0.0508662	0.0420758
PB.97760.301	Eif3m	Eif3m-S-301	ISM	0.00612031	0.140116	0.148089
PB.9400.76	Gm4340	Gm4340-S-76	FSM	0	0.0653474	0.0212592
PB.100933.4418	Gm14326	Gm14326-S-4418	FSM	0.0152311	0.0212592	0.0272511
PB.18827.90	Flot2	Flot2-S-90	ISM	0	0.0152311	0.0122034
PB.166331.297	Vps35	Vps35-S-297	ISM	0.00916647	0.0852751	0.0992699
PB.92793.33	Aldh9a1	Aldh9a1-S-33	ISM	0.00916647	0.0242596	0.0272511
PB.169819.127	Dctd	Dctd-S-127	NNC	0.0272511	0.00306484	0.00916647
PB.14056.257	Brip1	Brip1-S-257	ISM	0.00612031	0.0332074	0.0332074
PB.32593.82	Adgrv1	Adgrv1-S-82	FSM	0	0.0182497	0.0302337
PB.20371.25	Prkar1a	Prkar1a-S-25	ISM	0	0.0479447	0.0880898
PB.2793.104	Tfam	Tfam-S-104	FSM	0	0.0302337	0.0361723
PB.130873.210	Dmtf1	Dmtf1-S-210	ISM	0	0.0152311	0.0122034
PB.92576.17	Mettl18	Mettl18-S-17	FSM	0	0.0122034	0.0212592
PB.14677.1370	Brca1	Brca1-S-1370	NNC	0.00306484	0.0272511	0.0242596
PB.148432.3	Cald1	Cald1-S-3	ISM	0.148089	0.472936	0.51232
PB.49431.236	Fam49b	Fam49b-S-236	ISM	0	0.0122034	0.0152311
PB.168511.261	Upf3a	Upf3a-S-261	ISM	0.00612031	0.0682187	0.102045
PB.77235.111	Brms1	Brms1-S-111	ISM	0	0.0122034	0.0332074
PB.91653.157	Aspm	Aspm-S-157	ISM	0.00916647	0.0450145	0.0420758
PB.162184.9	Uqcrc2	Uqcrc2-S-9	ISM	0.00306484	0.0272511	0.00916647
PB.181690.194	Stag1	Stag1-S-194	ISM	0.0391284	0.234266	0.163846
PB.116516.802	Mcl1	Mcl1-S-802	ISM	0.00612031	0.0479447	0.0624679
PB.148608.2	Trim24	Trim24-S-2	ISM	0.0122034	0.153369	0.155999
PB.153374.2416	Bcam	Bcam-S-2416	FSM	0	0.0152311	0.00612031
PB.10295.2789	Baz2a	Baz2a-S-2789	NNC	0.00306484	0.0242596	0.0272511
PB.165118.162	Cep44	Cep44-S-162	FSM	0	0.00306484	0.0152311
PB.103803.8	Phospho2	Phospho2-S-8	FSM	0.00612031	0.0152311	0.0242596
PB.137663.3	Add1	Add1-S-3	NIC	0	0.0595801	0.0508662
PB.14056.1365	Rps6kb1	Rps6kb1-S-1365	NIC	0	0.00306484	0.0152311
PB.95438.361	Gapvd1	Gapvd1-S-361	ISM	0	0.0450145	0.0242596
PB.103151.61	Rif1	Rif1-S-61	NNC	0	0	0.0152311
PB.50027.820	St13	St13-S-820	ISM	0.0332074	0.155999	0.300051
PB.154037.408	Uri1	Uri1-S-408	ISM	0.0936954	0.425941	0.380831
PB.120524.122	Erp44	Erp44-S-122	ISM	0.00306484	0.0332074	0.0242596
PB.179167.23	Usp28	Usp28-S-23	ISM	0.00916647	0.0332074	0.0302337
PB.110299.277	Ccnl1	Ccnl1-S-277	ISM	0	0.0739365	0.0767832
PB.130245.238	Exosc10	Exosc10-S-238	ISM	0	0.0152311	0.0391284
PB.60980.69	Son	Son-S-69	ISM	0	0.00916647	0.0152311
PB.29727.1321	Gtpbp4	Gtpbp4-S-1321	ISM	0.0242596	0.115809	0.179359
PB.92600.8	Ccdc181	Ccdc181-S-8	ISM	0	0.0152311	0.00916647
PB.133066.125	Usp46	Usp46-S-125	FSM	0.00306484	0.0710817	0.0936954
PB.176073.506	Syncrip	Syncrip-S-506	FSM	0	0.00916647	0.0182497
PB.107971.225	Mtg2	Mtg2-S-225	ISM	0.0182497	0.00612031	0.00612031
PB.78371.44	Uhrf2	Uhrf2-S-44	FSM	0.0302337	0.0420758	0.0212592
PB.21995.170	Bcap29	Bcap29-S-170	ISM	0.00306484	0.0767832	0.115809
PB.35601.84	Snrnp48	Snrnp48-S-84	ISM	0	0.00306484	0.0182497
PB.67342.581	Birc6	Birc6-S-581	ISM	0.0182497	0.0332074	0.0595801
PB.94145.419	Hspa14	Hspa14-S-419	ISM	0.0122034	0.00612031	0.0152311
PB.14943.1860	Ddx5	Ddx5-S-1860	NIC	0	0.0182497	0
PB.76397.565	Oga	Oga-S-565	ISM	0.00306484	0.0595801	0.0595801
PB.84361.126	Rnpep	Rnpep-S-126	ISM	0.0122034	0.0391284	0.0508662
PB.82753.1756	Trip12	Trip12-S-1756	NNC	0	0.0391284	0.0450145
PB.181570.11	Copb2	Copb2-S-11	ISM	0.00612031	0.126685	0.0936954
PB.159346.52	Pepd	Pepd-S-52	ISM	0	0.0182497	0.00916647
PB.155548.736	Iqgap1	Iqgap1-S-736	ISM	0.0122034	0.113071	0.169044
PB.27278.475	Srp54b	Srp54b-S-475	ISM	0	0.00916647	0.0182497
PB.99339.235	Snx5	Snx5-S-235	ISM	0	0.0212592	0.00612031
PB.147411.184	Ipo8	Ipo8-S-184	ISM	0.00306484	0.0710817	0.104813
PB.45148.4	Mipep	Mipep-S-4	ISM	0	0.0152311	0.0361723
PB.118119.7	Cenpe	Cenpe-S-7	ISM	0.0242596	0.331389	0.329182
PB.139518.37	2022-09-11	Sept11-S-37	ISM	0.00306484	0.0450145	0.0508662
PB.62398.412	U2af1	U2af1-S-412	ISM	0.0420758	0.0739365	0.0992699
PB.25176.1264	Hsp90aa1	Hsp90aa1-S-1264	NIC	0.00306484	0.0152311	0.00612031
PB.113985.6	Hltf	Hltf-S-6	ISM	0.00306484	0.00612031	0.0272511
PB.176040.146	Cep162	Cep162-S-146	ISM	0.00306484	0.00916647	0.0242596
PB.72951.72	Dmxl1	Dmxl1-S-72	ISM	0.00306484	0.0182497	0.00916647
PB.125170.1	Sdcbp	Sdcbp-S-1	ISM	0	0.0508662	0.0964865
PB.172439.28	Zc3h18	Zc3h18-S-28	ISM	0	0.0508662	0.0566839
PB.83216.96	Hdlbp	Hdlbp-S-96	ISM	0.0653474	0.0624679	0.0796219
PB.77465.994	Hnrnpul2	Hnrnpul2-S-994	ISM	0.0122034	0.0880898	0.140116
PB.118867.5	Zranb2	Zranb2-S-5	ISM	0.0508662	0.304588	0.427944
PB.128983.14	Ebna1bp2	Ebna1bp2-S-14	FSM	0.00612031	0.0122034	0.0450145
PB.1309.194	Zup1	Zup1-S-194	ISM	0	0.00306484	0.0152311
PB.158.188	Fbxo5	Fbxo5-S-188	ISM	0	0.0272511	0.0450145
PB.79888.315	Mrpl15	Mrpl15-S-315	ISM	0.0332074	0.21712	0.224504
PB.4991.274	Usp15	Usp15-S-274	ISM	0.00306484	0.00916647	0.0242596
PB.10316.466	Dnajc14	Dnajc14-S-466	ISM	0	0.0182497	0.0302337
PB.108309.694	Snx16	Snx16-S-694	ISM	0.00306484	0.0242596	0.0182497
PB.50769.171	Slc38a4	Slc38a4-S-171	ISM	0	0.0242596	0.0302337
PB.41227.191	Kpna3	Kpna3-S-191	ISM	0.00612031	0.0653474	0.0964865
PB.140667.36	Ppp1cc	Ppp1cc-S-36	ISM	0.0122034	0.0302337	0.0242596
PB.165967.345	Rbmxl1	Rbmxl1-S-345	FSM	0	0.0182497	0.0537793
PB.103794.164	Ppig	Ppig-S-164	ISM	0.118539	0.571236	0.668627
PB.49258.534	Atad2	Atad2-S-534	ISM	0	0.0152311	0.0272511
PB.102304.1312	Gle1	Gle1-S-1312	FSM	0	0.0182497	0.00916647
PB.2025.64	Gopc	Gopc-S-64	ISM	0	0.00612031	0.0182497
PB.62949.2803	Hsp90ab1	Hsp90ab1-S-2803	ISM	0.123977	0.939744	1.06261
PB.142128.43	Uspl1	Uspl1-S-43	ISM	0.00306484	0.0182497	0.0272511
PB.176073.100	Snx14	Snx14-S-100	ISM	0	0.0272511	0.0450145
PB.153953.497	Nudt19	Nudt19-S-497	ISM	0.00612031	0.0182497	0.0242596
PB.93509.226	Parp1	Parp1-S-226	ISM	0.00306484	0.0182497	0.0332074
PB.35599.18	Dsp	Dsp-S-18	ISM	0	0.0332074	0.0450145
PB.166141.258	Zfp330	Zfp330-S-258	ISM	0.118539	0.633411	0.532347
PB.188679.59	Htatsf1	Htatsf1-S-59	NIC	0.00916647	0.0242596	0.0182497
PB.15832.250	Dbnl	Dbnl-S-250	ISM	0	0.0152311	0.0122034
PB.77470.2008	Ahnak	Ahnak-S-2008	FSM	0.00306484	0.110326	0.169044
PB.69149.2173	Etf1	Etf1-S-2173	ISM	0.0242596	0.226954	0.262991
PB.146476.200	Ccdc77	Ccdc77-S-200	ISM	0	0.0272511	0.0152311
PB.158521.102	Lig1	Lig1-S-102	ISM	0	0.00612031	0.0182497
PB.122887.414	Osbpl9	Osbpl9-S-414	ISM	0.0212592	0.113071	0.161237
PB.27994.1431	Zbtb1	Zbtb1-S-1431	FSM	0	0.0182497	0.0242596
PB.65816.81	Pbx2	Pbx2-S-81	ISM	0.00306484	0.0152311	0.0212592
PB.175195.42	Lactb	Lactb-S-42	ISM	0.0182497	0.0508662	0.0537793
PB.59491.584	Kpna1	Kpna1-S-584	ISM	0	0.00916647	0.0212592
PB.166081.453	Smarca5	Smarca5-S-453	ISM	0.00612031	0.0152311	0.00306484
PB.62949.3555	Hsp90ab1	Hsp90ab1-S-3555	NIC	0	0.0152311	0.0212592
PB.8600.793	Eef2	Eef2-S-793	ISM	0.00306484	0.0537793	0.0682187
PB.183466.169	Upf3b	Upf3b-S-169	NIC	0.00612031	0.0152311	0.00612031
PB.123138.1115	Nasp	Nasp-S-1115	ISM	0.00306484	0.0212592	0.00612031
PB.52783.8	Nsmce2	Nsmce2-S-8	ISM	0.00612031	0.0964865	0.0739365
PB.31621.184	Thoc3	Thoc3-S-184	ISM	0	0.00612031	0.0182497
PB.49086.1019	Rad21	Rad21-S-1019	ISM	0.00306484	0.0332074	0.0332074
PB.78632.9	Hectd2	Hectd2-S-9	ISM	0	0.0272511	0.0152311
PB.123801.202	Zcchc17	Zcchc17-S-202	NIC	0.00916647	0.00916647	0.0152311
PB.189426.13	Dmd	Dmd-S-13	ISM	0	0.0212592	0.00612031
PB.153374.597	Clasrp	Clasrp-S-597	ISM	0	0.0152311	0.00916647
PB.17754.9	G3bp1	G3bp1-S-9	ISM	0.00916647	0.0682187	0.0852751
PB.4659.1159	Cct2	Cct2-S-1159	ISM	0.00612031	0.0152311	0.0212592
PB.50604.138	Twf1	Twf1-S-138	ISM	0.0710817	0.297774	0.262991
PB.146420.310	Bms1	Bms1-S-310	ISM	0.00306484	0.0361723	0.0537793
PB.106784.32	Tpx2	Tpx2-S-32	NIC	0	0.0152311	0.0420758
PB.130211.8342	Zfp978	Zfp978-S-8342	NNC	0.0242596	0.00612031	0.0122034
PB.155514.682	Idh2	Idh2-S-682	ISM	0	0.00612031	0.0420758
PB.151646.363	Hnrnpf	Hnrnpf-S-363	FSM	0.0595801	0.407732	0.431937
PB.72314.825	Ctnna1	Ctnna1-S-825	ISM	0	0.0152311	0.0302337
PB.5922.71	Sgk1	Sgk1-S-71	ISM	0	0.0152311	0.0152311
PB.113385.931	Srsf11	Srsf11-S-931	ISM	0	0.0152311	0.0272511
PB.92164.63	Abl2	Abl2-S-63	ISM	0	0.00916647	0.0152311
PB.59902.9	Cip2a	Cip2a-S-9	ISM	0	0.0212592	0.0272511
PB.167290.473	Sf3b3	Sf3b3-S-473	ISM	0	0.0152311	0.0212592
PB.176134.397	Morf4l1	Morf4l1-S-397	ISM	0	0.0122034	0.0182497
PB.86765.1035	Tcea1	Tcea1-S-1035	ISM	0.00306484	0.0332074	0.0182497
PB.34613.22	Vps41	Vps41-S-22	ISM	0	0.00612031	0.0152311
PB.2472.1596	Ccar1	Ccar1-S-1596	FSM	0.0152311	0.0479447	0.0653474
PB.83676.285	Tsn	Tsn-S-285	ISM	0.00916647	0.0212592	0.0212592
PB.128086.200	Ift74	Ift74-S-200	ISM	0.00612031	0.0537793	0.0450145
PB.76397.404	Oga	Oga-S-404	ISM	0.00306484	0.181921	0.161237
PB.134322.45	Gak	Gak-S-45	ISM	0.0391284	0.0212592	0.0152311
PB.3541.154	Rtcb	Rtcb-S-154	ISM	0	0.0272511	0.0122034
PB.78513.97	Pten	Pten-S-97	ISM	0	0.0182497	0
PB.170607.1087	Sugp2	Sugp2-S-1087	ISM	0	0.0122034	0.0182497
PB.69273.543	Diaph1	Diaph1-S-543	ISM	0	0.0710817	0.0566839
PB.187858.376	Uba1	Uba1-S-376	ISM	0.00612031	0.110326	0.107574
PB.187244.207	Ofd1	Ofd1-S-207	ISM	0.00916647	0.0212592	0.0302337
PB.62949.3179	Hsp90ab1	Hsp90ab1-S-3179	ISM	0.270045	0.916692	1.03682
PB.63580.112	Pja2	Pja2-S-112	ISM	0	0.00916647	0.0212592
PB.111103.410	Chtop	Chtop-S-410	NIC	0	0.0182497	0.0242596
PB.81765.85	Kctd18	Kctd18-S-85	ISM	0	0.0212592	0.0152311
PB.78666.532	Kif11	Kif11-S-532	ISM	0	0.0332074	0.0361723
PB.172482.903	Rpl13	Rpl13-S-903	NNC	0.0566839	0.0242596	0.0212592
PB.34891.347	Tdp2	Tdp2-S-347	FSM	0.00612031	0.0361723	0.0361723
PB.56129.288	Umps	Umps-S-288	ISM	0	0.0182497	0.00916647
PB.9495.13	Ppp1r12a	Ppp1r12a-S-13	ISM	0.0122034	0.241525	0.27472
PB.182545.38	Ctnnb1	Ctnnb1-S-38	ISM	0	0.00612031	0.0152311
PB.45170.24	Sacs	Sacs-S-24	ISM	0.00612031	0.0682187	0.0824525
PB.101393.40	Kin	Kin-S-40	NIC	0.0122034	0.00916647	0.0152311
PB.130482.58	Nol9	Nol9-S-58	ISM	0.0122034	0.155999	0.234266
PB.170245.6	Sh3rf1	Sh3rf1-S-6	ISM	0	0.0302337	0.0272511
PB.2793.134	Tfam	Tfam-S-134	ISM	0.00306484	0.0122034	0.0152311
PB.170134.216	Hmgb2	Hmgb2-S-216	ISM	1.65906	2.18444	3.07211
PB.57823.108	Urb1	Urb1-S-108	ISM	0	0.00612031	0.0182497
PB.5153.925	Pa2g4	Pa2g4-S-925	ISM	0	0.0653474	0.0936954
PB.10235.819	Dctn2	Dctn2-S-819	ISM	0.00306484	0.0152311	0.00612031
PB.158336.5	Zfp667	Zfp667-S-5	FSM	0.0212592	0.0391284	0.0682187
PB.28327.1384	Rbm25	Rbm25-S-1384	ISM	0	0.0361723	0.0880898
PB.136324.186	Hsph1	Hsph1-S-186	ISM	0.00306484	0.0767832	0.0537793
PB.50843.717	Ddx23	Ddx23-S-717	ISM	0	0.00306484	0.0242596
PB.17233.46	Slu7	Slu7-S-46	ISM	0.00306484	0.00916647	0.0242596
PB.58819.479	Eef1akmt4	Eef1akmt4-S-479	FSM	0.0624679	0.0212592	0.0242596
PB.159377.171	Cep89	Cep89-S-171	ISM	0	0.0361723	0.0212592
PB.174975.211	Fem1b	Fem1b-S-211	FSM	0	0.0212592	0.0272511
PB.85993.941	Hnrnpu	Hnrnpu-S-941	ISM	0	0.0391284	0.0212592
PB.97737.638	Prrg4	Prrg4-S-638	ISM	0	0.00916647	0.0152311
PB.3704.95	Gas2l3	Gas2l3-S-95	ISM	0	0.0767832	0.126685
PB.98290.468	Zfp106	Zfp106-S-468	ISM	0.00306484	0.0182497	0.0152311
PB.17474.188	Gfpt2	Gfpt2-S-188	ISM	0	0.0272511	0.0242596
PB.76053.117	Aldh18a1	Aldh18a1-S-117	ISM	0	0.0391284	0.0624679
PB.165967.353	Rbmxl1	Rbmxl1-S-353	FSM	0	0.0420758	0.0450145
PB.62620.1219	Tubb5	Tubb5-S-1219	FSM	0.00306484	0.0212592	0.0420758
PB.21039.225	Rab10	Rab10-S-225	ISM	0.0242596	0.163846	0.17679
PB.24374.426	Tmed10	Tmed10-S-426	ISM	0	0.0122034	0.0212592
PB.176228.618	U2surp	U2surp-S-618	ISM	0.00916647	0.113071	0.161237
PB.95154.202	Trub2	Trub2-S-202	ISM	0	0	0.0152311
PB.500.208	Vta1	Vta1-S-208	ISM	0.00306484	0.0182497	0.0739365
PB.167760.504	Slc7a5	Slc7a5-S-504	ISM	0	0.0272511	0.00916647
PB.24944.159	Dicer1	Dicer1-S-159	ISM	0	0.0361723	0.0212592
PB.91707.359	Uchl5	Uchl5-S-359	ISM	0.00306484	0.0391284	0.0682187
PB.135113.802	Sbno1	Sbno1-S-802	FSM	0.0242596	0.189569	0.192105
PB.82973.158	Hjurp	Hjurp-S-158	FSM	0	0.0212592	0.00612031
PB.183723.134	Aifm1	Aifm1-S-134	ISM	0.0272511	0.102045	0.0767832
PB.180269.16	Vps13c	Vps13c-S-16	NIC	0.00916647	0.0302337	0.0361723
PB.96903.559	Ttn	Ttn-S-559	NIC	0.00916647	0.0682187	0.0450145
PB.72153.1	Wdr36	Wdr36-S-1	ISM	0.0152311	0.132079	0.163846
PB.50754.662	Slc38a2	Slc38a2-S-662	ISM	0.00306484	0.0182497	0.0122034
PB.97657.127	Cat	Cat-S-127	ISM	0	0.0152311	0.0272511
PB.103794.165	Ppig	Ppig-S-165	ISM	0.137444	0.0852751	0.113071
PB.123138.1138	Nasp	Nasp-S-1138	ISM	0.0182497	0.0653474	0.0508662
PB.40420.45	Prxl2a	Prxl2a-S-45	FSM	0.00306484	0.0391284	0.0272511
PB.151260.17	Trnt1	Trnt1-S-17	ISM	0.0391284	0.253507	0.318078
PB.111033.43	Slc50a1	Slc50a1-S-43	FSM	0.0242596	0.00306484	0.00916647
PB.31329.389	Nup153	Nup153-S-389	ISM	0	0.0152311	0.00916647
PB.148245.124	Calu	Calu-S-124	ISM	0	0.0537793	0.0739365
PB.164796.318	Slc25a4	Slc25a4-S-318	FSM	0	0.0182497	0.0242596
PB.78124.265	Dmrt1	Dmrt1-S-265	ISM	0.00612031	0.0242596	0.0152311
PB.31758.1458	Hnrnpk	Hnrnpk-S-1458	FSM	0	0.0212592	0
PB.150408.8	Rpn1	Rpn1-S-8	ISM	0.00612031	0.00916647	0.0182497
PB.64982.13	Agpat4	Agpat4-S-13	ISM	0.00916647	0.0964865	0.113071
PB.62409.1447	Akap8l	Akap8l-S-1447	FSM	0	0.0332074	0.0152311
PB.116954.5	Sike1	Sike1-S-5	FSM	0.00306484	0.0272511	0.0152311
PB.91829.450	Tpr	Tpr-S-450	ISM	0.00916647	0.207189	0.246335
PB.165672.132	Haus8	Haus8-S-132	ISM	0.0152311	0.155999	0.145438
PB.45796.220	Zc3h13	Zc3h13-S-220	ISM	0	0.0152311	0.0710817
PB.161506.7	Clpb	Clpb-S-7	ISM	0.00306484	0.0152311	0.00612031
PB.151961.289	Phb2	Phb2-S-289	ISM	0.00612031	0.0242596	0.0122034
PB.77684.2	Fam111a	Fam111a-S-2	FSM	0.0624679	0.0936954	0.0682187
PB.50814.115	Rpap3	Rpap3-S-115	ISM	0.00612031	0.0332074	0.0682187
PB.8544.2149	Cirbp	Cirbp-S-2149	FSM	0.00612031	0.0182497	0
PB.124012.923	Srrm1	Srrm1-S-923	ISM	0.471022	1.66314	1.76642
PB.65879.372	Pou5f1	Pou5f1-S-372	FSM	0	0.0302337	0.0242596
PB.5153.876	Pa2g4	Pa2g4-S-876	ISM	0.00612031	0.0796219	0.0767832
PB.111103.431	Chtop	Chtop-S-431	ISM	0.00306484	0.0653474	0.104813
PB.145327.139	Isy1	Isy1-S-139	ISM	0.0242596	0.123977	0.113071
PB.61066.48	Cbr1	Cbr1-S-48	ISM	0	0.0152311	0.0152311
PB.180627.10	Leo1	Leo1-S-10	ISM	0.00612031	0.171633	0.189569
PB.27278.446	Srp54b	Srp54b-S-446	ISM	0	0.0332074	0.0272511
PB.162580.1255	Fus	Fus-S-1255	FSM	0	0.0852751	0.0595801
PB.62620.1202	Tubb5	Tubb5-S-1202	FSM	0.0152311	0.251122	0.262991
PB.66677.28	Safb	Safb-S-28	FSM	0.00612031	0.0182497	0.0361723
PB.58565.583	Ntan1	Ntan1-S-583	FSM	0.0242596	0.0739365	0.0682187
PB.95550.381	Zbtb6	Zbtb6-S-381	NNC	0	0.00916647	0.0152311
PB.114746.178	Jade1	Jade1-S-178	FSM	0	0.0182497	0.0212592
PB.30712.258	Serpinb6a	Serpinb6a-S-258	FSM	0.00916647	0.0682187	0.0880898
PB.8638.358	Txnrd1	Txnrd1-S-358	NNC	0.00306484	0.0332074	0.0212592
PB.81423.178	Slc39a10	Slc39a10-S-178	ISM	0	0.0272511	0.0332074
PB.15730.23	Pes1	Pes1-S-23	ISM	0	0.0152311	0.0212592
PB.7514.473	Ccdc138	Ccdc138-S-473	ISM	0	0.0242596	0.00916647
PB.99843.908	Eif2s2	Eif2s2-S-908	ISM	2.86055	2.91492	2.93811
PB.33398.115	Cwc27	Cwc27-S-115	FSM	0.0122034	0.0152311	0.0242596
PB.17568.9	Phykpl	Phykpl-S-9	ISM	0.00916647	0.0302337	0.0479447
PB.100319.243	Serinc3	Serinc3-S-243	ISM	0.00612031	0.0242596	0.0212592
PB.78846.110	Zfp518a	Zfp518a-S-110	NNC	0	0.0152311	0.00306484
PB.118640.104	Fubp1	Fubp1-S-104	NIC	0.00306484	0	0.0152311
PB.19771.20	Casc3	Casc3-S-20	ISM	0	0.00306484	0.0182497
PB.62949.3356	Hsp90ab1	Hsp90ab1-S-3356	NNC	0.00916647	0.00916647	0.0242596
PB.59915.8	Ift57	Ift57-S-8	ISM	0.00306484	0.0182497	0.0182497
PB.129373.369	Sfpq	Sfpq-S-369	ISM	0.0992699	0.27472	0.187026
PB.56854.125	Dzip3	Dzip3-S-125	ISM	0	0.0302337	0.0182497
PB.171588.54	Ccdc113	Ccdc113-S-54	ISM	0	0.00916647	0.0182497
PB.95986.597	Prpf40a	Prpf40a-S-597	ISM	0	0.0152311	0.0182497
PB.162270.53	Ubfd1	Ubfd1-S-53	ISM	0.00306484	0.0272511	0.0272511
PB.61974.883	Ccnf	Ccnf-S-883	ISM	0	0.0450145	0.0242596
PB.184890.979	Pola1	Pola1-S-979	ISM	0.0796219	0.514157	0.503083
PB.16817.16	Pnpt1	Pnpt1-S-16	ISM	0.00916647	0.115809	0.126685
PB.181690.265	Stag1	Stag1-S-265	ISM	0	0.0479447	0.0272511
PB.125915.135	Casp8ap2	Casp8ap2-S-135	ISM	0.0391284	0.329182	0.324755
PB.144068.114	Hibadh	Hibadh-S-114	ISM	0	0.0212592	0.00916647
PB.116994.1	Rsbn1	Rsbn1-S-1	ISM	0.0739365	0.140116	0.148089
PB.50038.431	Rangap1	Rangap1-S-431	ISM	0	0.0332074	0.0508662
PB.55904.730	Lsg1	Lsg1-S-730	ISM	0.00612031	0.0710817	0.0964865
PB.124012.217	Clic4	Clic4-S-217	FSM	0	0.0152311	0.0391284
PB.86379.153	Rrp15	Rrp15-S-153	ISM	0.00916647	0.0272511	0.0508662
PB.107503.307	Cse1l	Cse1l-S-307	ISM	0	0.00916647	0.0242596
PB.161189.16	Ints4	Ints4-S-16	ISM	0	0.0182497	0.0212592
PB.95552.177	Strbp	Strbp-S-177	ISM	0	0.00916647	0.0272511
PB.150664.11	Ccdc174	Ccdc174-S-11	ISM	0.00306484	0.0212592	0.0332074
PB.4991.259	Usp15	Usp15-S-259	ISM	0.00612031	0.0242596	0.0302337
PB.17697.28	P4ha2	P4ha2-S-28	ISM	0	0.0508662	0.0302337
PB.74456.473	Sf3b2	Sf3b2-S-473	ISM	0.0122034	0.107574	0.115809
PB.149159.7	Stk31	Stk31-S-7	NNC	0.0332074	0.0739365	0.0880898
PB.158216.270	Cnot3	Cnot3-S-270	NIC	0	0.0152311	0.00916647
PB.124741.144	Park7	Park7-S-144	NNC	0.0302337	0.0122034	0.0152311
PB.77468.52	Ubxn1	Ubxn1-S-52	FSM	0	0.0122034	0.0302337
PB.89843.23	Psmd1	Psmd1-S-23	ISM	0.0152311	0.123977	0.113071
PB.62447.109	Zfp871	Zfp871-S-109	FSM	0	0.0212592	0.0272511
PB.114888.195	Naa15	Naa15-S-195	ISM	0.0710817	0.251122	0.199676
PB.11814.130	Pttg1	Pttg1-S-130	ISM	0.00306484	0.0242596	0.0302337
PB.14417.549	Kpnb1	Kpnb1-S-549	ISM	0	0.0479447	0.0653474
PB.134958.125	Ptpn11	Ptpn11-S-125	ISM	0	0.0122034	0.0332074
PB.35601.35	Snrnp48	Snrnp48-S-35	ISM	0	0.00306484	0.0152311
PB.154308.772	Ruvbl2	Ruvbl2-S-772	ISM	0.0566839	0.0420758	0.0852751
PB.66134.46	Slc35b2	Slc35b2-S-46	FSM	0.0682187	0.0152311	0.0272511
PB.50846.1008	Tuba1b	Tuba1b-S-1008	NNC	0.0152311	0.0152311	0.00612031
PB.138462.7	Pgm2	Pgm2-S-7	ISM	0.00612031	0.0361723	0.0361723
PB.82103.128	Idh1	Idh1-S-128	ISM	0	0.0212592	0.00916647
PB.102400.1	Nup214	Nup214-S-1	ISM	0.0767832	0.578147	0.630148
PB.111102.661	Ubap2l	Ubap2l-S-661	ISM	0	0.00612031	0.0152311
PB.77086.1162	Eif3a	Eif3a-S-1162	ISM	0.0479447	0.387103	0.506788
PB.26571.78	Ankmy2	Ankmy2-S-78	ISM	0	0.00916647	0.0152311
PB.143530.139	Zc3hav1	Zc3hav1-S-139	ISM	0	0.0182497	0.0272511
PB.173708.96	Dcps	Dcps-S-96	ISM	0.00612031	0.0332074	0.0710817
PB.102284.236	Setx	Setx-S-236	NIC	0.00612031	0.0212592	0.0332074
PB.77086.1202	Eif3a	Eif3a-S-1202	ISM	0.0212592	0.248731	0.286314
PB.153374.1824	Tomm40	Tomm40-S-1824	FSM	0.00916647	0.0272511	0.0479447
PB.5870.1515	Mtfr2	Mtfr2-S-1515	ISM	0	0.00306484	0.0152311
PB.114746.153	Jade1	Jade1-S-153	ISM	0	0.0624679	0.0682187
PB.180100.8	Ints14	Ints14-S-8	ISM	0	0.00612031	0.0152311
PB.147152.142	C2cd5	C2cd5-S-142	ISM	0	0.0302337	0.0242596
PB.145134.456	Exoc6b	Exoc6b-S-456	ISM	0	0.0212592	0.0122034
PB.125915.1259	Mdn1	Mdn1-S-1259	ISM	0	0.00306484	0.0152311
PB.135025.1126	Kdm2b	Kdm2b-S-1126	ISM	0	0.0272511	0.0242596
PB.146569.321	Gdf3	Gdf3-S-321	FSM	0	0.0152311	0.0242596
PB.32286.406	Gm47467	Gm47467-S-406	FSM	0.0450145	0.00612031	0.00916647
PB.38534.18	Plk2	Plk2-S-18	FSM	0.00306484	0.0212592	0.0212592
PB.5216.729	Akap12	Akap12-S-729	ISM	0.0122034	0.126685	0.0992699
PB.5216.713	Akap12	Akap12-S-713	ISM	0.00306484	0.0595801	0.137444
PB.179661.225	Edc3	Edc3-S-225	ISM	0.00612031	0.0653474	0.0767832
PB.56746.312	Gm4737	Gm4737-S-312	FSM	0.00306484	0.0212592	0.0450145
PB.168431.4	Col4a2	Col4a2-S-4	ISM	0	0.0242596	0.0332074
PB.2472.1558	Ccar1	Ccar1-S-1558	FSM	0.0182497	0.0420758	0.0391284
PB.47252.352	Tm9sf2	Tm9sf2-S-352	ISM	0	0.0272511	0.0122034
PB.111287.91	Hist2h2ac	Hist2h2ac-S-91	FSM	0.00306484	0.0595801	0.0880898
PB.12749.122	Usp22	Usp22-S-122	ISM	0	0.0182497	0.00612031
PB.179415.98	Npat	Npat-S-98	ISM	0	0.0212592	0.0361723
PB.122867.169	Zfyve9	Zfyve9-S-169	ISM	0	0.0182497	0.00612031
PB.53900.21	Atxn10	Atxn10-S-21	ISM	0	0.0212592	0.0332074
PB.157404.4222	Mvp	Mvp-S-4222	ISM	0	0.00916647	0.0242596
PB.103794.223	Ppig	Ppig-S-223	NIC	0.0182497	0.00612031	0.00916647
PB.19958.13	Dhx8	Dhx8-S-13	ISM	0	0.129386	0.123977
PB.182191.4	Epm2aip1	Epm2aip1-S-4	FSM	0	0.0272511	0.0122034
PB.115244.282	Eif2a	Eif2a-S-282	FSM	0.00306484	0.123977	0.129386
PB.14939.469	Ccdc47	Ccdc47-S-469	NNC	0	0.00612031	0.0152311
PB.32286.863	Gm46430	Gm46430-S-863	FSM	0.0212592	0.00612031	0.00916647
PB.180100.240	Dpp8	Dpp8-S-240	ISM	0	0.00916647	0.0332074
PB.145375.179	Sec61a1	Sec61a1-S-179	ISM	0.00306484	0.0182497	0.00612031
PB.174107.172	Tagln	Tagln-S-172	FSM	0	0.0302337	0.0332074
PB.8600.14	Thop1	Thop1-S-14	ISM	0	0.0796219	0.0964865
PB.133066.124	Usp46	Usp46-S-124	ISM	0.0152311	0.179359	0.204691
PB.130211.603	Zfp990	Zfp990-S-603	FSM	0	0.0420758	0.0242596
PB.170719.10	Colgalt1	Colgalt1-S-10	ISM	0	0.00306484	0.0152311
PB.140080.419	Golga3	Golga3-S-419	ISM	0	0.00306484	0.0182497
PB.126349.43	Melk	Melk-S-43	ISM	0.00306484	0.0242596	0.0212592
PB.2598.301	Arid5b	Arid5b-S-301	ISM	0.00916647	0.0302337	0.0653474
PB.65900.211	Mdc1	Mdc1-S-211	NIC	0.00612031	0.0152311	0.0272511
PB.63801.510	Smchd1	Smchd1-S-510	ISM	0.326971	1.1843	1.18242
PB.65900.962	Ppp1r10	Ppp1r10-S-962	ISM	0.0122034	0	0.0152311
PB.14789.314	Nsf	Nsf-S-314	ISM	0.00612031	0.0739365	0.102045
PB.37102.18	Ccdc127	Ccdc127-S-18	FSM	0.0182497	0.0936954	0.161237
PB.44618.37	Ap5m1	Ap5m1-S-37	FSM	0.0242596	0.0182497	0.00306484
PB.161518.270	Anapc15	Anapc15-S-270	NNC	0	0.00612031	0.0182497
PB.138892.262	Ociad1	Ociad1-S-262	ISM	0.0242596	0.229397	0.192105
PB.111256.128	Prune1	Prune1-S-128	ISM	0	0.0302337	0.0182497
PB.41598.49	Polr3d	Polr3d-S-49	ISM	0	0.0152311	0.0122034
PB.169553.296	Triml2	Triml2-S-296	FSM	0.0182497	0.0182497	0.0242596
PB.33194.58	Utp15	Utp15-S-58	FSM	0.0182497	0.209681	0.25826
PB.108750.368	Ect2	Ect2-S-368	NIC	0	0.0242596	0.0566839
PB.8629.21	Tdg	Tdg-S-21	FSM	0.00612031	0.0212592	0.0182497
PB.7790.1078	Herc4	Herc4-S-1078	ISM	0.00612031	0.0242596	0.0242596
PB.114694.36	Plk4	Plk4-S-36	FSM	0	0.0182497	0.0272511
PB.402.1263	Utrn	Utrn-S-1263	ISM	0.00306484	0.0796219	0.0936954
PB.25057.266	Setd3	Setd3-S-266	FSM	0.00916647	0.0212592	0.0272511
PB.65561.154	Rnf8	Rnf8-S-154	ISM	0	0.0212592	0.0152311
PB.77470.2014	Ahnak	Ahnak-S-2014	FSM	0.0852751	0.0508662	0.0479447
PB.138979.19	Fip1l1	Fip1l1-S-19	FSM	0.0182497	0.0508662	0.0537793
PB.28327.500	Rbm25	Rbm25-S-500	ISM	0.0710817	0.0122034	0.00916647
PB.12726.128	Top3a	Top3a-S-128	ISM	0	0.0739365	0.137444
PB.43599.5	Nid2	Nid2-S-5	ISM	0.00612031	0.0182497	0.0122034
PB.148452.1	Stra8	Stra8-S-1	ISM	0.0152311	0.0537793	0.0739365
PB.158472.675	Zscan4f	Zscan4f-S-675	ISM	0.00306484	0.0332074	0.0212592
PB.65900.980	Ppp1r10	Ppp1r10-S-980	NIC	0.0537793	0.189569	0.234266
PB.110605.72	Golim4	Golim4-S-72	ISM	0	0.00916647	0.0272511
PB.91384.827	Adipor1	Adipor1-S-827	ISM	0.544886	0.425941	0.472936
PB.170708.189	Babam1	Babam1-S-189	NIC	0.0122034	0.0212592	0.0332074
PB.70055.490	Tcof1	Tcof1-S-490	ISM	0.00916647	0.148089	0.169044
PB.167290.2281	Rfwd3	Rfwd3-S-2281	ISM	0.00306484	0.0122034	0.0212592
PB.3466.118	Mterf2	Mterf2-S-118	FSM	0.00612031	0.0122034	0.0242596
PB.27542.108	Togaram1	Togaram1-S-108	ISM	0	0.0242596	0.0182497
PB.166320.1073	Asna1	Asna1-S-1073	ISM	0	0.0122034	0.0242596
PB.40776.248	Pip4p1	Pip4p1-S-248	ISM	0	0.0302337	0.0212592
PB.113804.224	Car2	Car2-S-224	ISM	0.0332074	0.0682187	0.110326
PB.80473.298	Mcm3	Mcm3-S-298	ISM	0.00612031	0.121262	0.0682187
PB.161848.15	Ctr9	Ctr9-S-15	ISM	0	0.0537793	0.0824525
PB.106945.94	Cep250	Cep250-S-94	FSM	0	0.0479447	0.0566839
PB.7238.141	Dcbld1	Dcbld1-S-141	ISM	0	0.0624679	0.0272511
PB.101550.82	Vim	Vim-S-82	ISM	0.00306484	0.0152311	0.0212592
PB.29691.148	Pfkp	Pfkp-S-148	ISM	0.00612031	0.0420758	0.0653474
PB.128727.95	Eps15	Eps15-S-95	ISM	0	0.0182497	0.00916647
PB.128219.59	Usp1	Usp1-S-59	ISM	0.0182497	0.253507	0.222049
PB.45252.42	Rnaseh2b	Rnaseh2b-S-42	FSM	0.0242596	0.0420758	0.0242596
PB.36916.2	Gm48423	Gm48423-S-2	FSM	0.0152311	0.0508662	0.00306484
PB.33436.410	Ipo11	Ipo11-S-410	ISM	0.00612031	0.0450145	0.0537793
PB.147411.767	Sinhcaf	Sinhcaf-S-767	ISM	0.0767832	0.523293	0.747244
PB.166594.10	Crnde	Crnde-S-10	NNC	0.0242596	0	0
PB.146562.181	Rimklb	Rimklb-S-181	ISM	0	0.0272511	0.0122034
PB.108034.40	Tpd52l2	Tpd52l2-S-40	NIC	0.0332074	0.0122034	0.0272511
PB.166081.363	Smarca5	Smarca5-S-363	ISM	0.00916647	0.0508662	0.0242596
PB.132029.224	D5Ertd579e	D5Ertd579e-S-224	ISM	0	0	0.0212592
PB.168511.257	Upf3a	Upf3a-S-257	ISM	0.102045	0.676461	0.798262
PB.70446.90	Fam210a	Fam210a-S-90	ISM	0.00306484	0.0182497	0.0272511
PB.71674.106	Psma8	Psma8-S-106	ISM	0	0.00306484	0.0152311
PB.168081.938	Rbm34	Rbm34-S-938	FSM	0.0242596	0.239111	0.279374
PB.64001.102	Fez2	Fez2-S-102	ISM	0.00916647	0.140116	0.126685
PB.10371.982	Limk2	Limk2-S-982	ISM	0	0.0152311	0.00612031
PB.140786.8	Snrnp35	Snrnp35-S-8	FSM	0.00612031	0.0682187	0.0653474
PB.21878.619	Rps7	Rps7-S-619	ISM	0.0936954	0.455571	0.802398
PB.125170.25	Sdcbp	Sdcbp-S-25	ISM	0	0.0242596	0.0212592
PB.82831.1580	Ncl	Ncl-S-1580	ISM	0.0420758	0.0653474	0.0767832
PB.17371.4	Med7	Med7-S-4	FSM	0.0152311	0.0332074	0.0361723
PB.55210.702	Mcm4	Mcm4-S-702	ISM	0.00306484	0.0122034	0.0332074
PB.4931.217	Xpot	Xpot-S-217	NNC	0.00612031	0.166449	0.174215
PB.72661.507	Tcerg1	Tcerg1-S-507	ISM	0	0.00612031	0.0182497
PB.94439.220	Rbm17	Rbm17-S-220	ISM	0.00916647	0.0242596	0.0242596
PB.78666.540	Kif11	Kif11-S-540	ISM	0	0.0361723	0.0450145
PB.72661.32	Tcerg1	Tcerg1-S-32	ISM	0.0122034	0.0212592	0.0152311
PB.3264.271	Lmnb2	Lmnb2-S-271	ISM	0	0.0182497	0.00916647
PB.77084.195	Cacul1	Cacul1-S-195	ISM	0	0.0391284	0.0595801
PB.172800.224	Aasdhppt	Aasdhppt-S-224	NIC	0	0.00306484	0.0212592
PB.162580.1312	Fus	Fus-S-1312	ISM	0	0.0152311	0.0450145
PB.85884.111	Fh1	Fh1-S-111	ISM	0	0.0182497	0.0182497
PB.91653.6	Zbtb41	Zbtb41-S-6	ISM	0	0.0361723	0.0182497
PB.161916.119	Far1	Far1-S-119	ISM	0.00612031	0.0361723	0.0653474
PB.146205.267	Rad18	Rad18-S-267	ISM	0.0152311	0.0566839	0.0653474
PB.129616.30	Gpatch3	Gpatch3-S-30	ISM	0	0.0152311	0.00306484
PB.54667.386	Hnrnpa1	Hnrnpa1-S-386	ISM	0.00916647	0.107574	0.134765
PB.131744.271	4930566F21Rik	4930566F21Rik-S-271	NNC	0.331389	0.0682187	0.0824525
PB.177986.32	Mre11a	Mre11a-S-32	ISM	0	0.0122034	0.0182497
PB.157600.77	Oat	Oat-S-77	ISM	0	0.00916647	0.0182497
PB.38534.2	Plk2	Plk2-S-2	ISM	0.0122034	0.270045	0.413839
PB.84899.148	Rnf2	Rnf2-S-148	ISM	0	0.0361723	0.0420758
PB.84004.353	Mcm6	Mcm6-S-353	ISM	0.0242596	0.129386	0.129386
PB.81683.1202	Hspd1	Hspd1-S-1202	NIC	0	0.0242596	0.0361723
PB.78677.230	Cep55	Cep55-S-230	ISM	0	0.0152311	0.0212592
PB.162815.12	Dock1	Dock1-S-12	ISM	0	0.0391284	0.0450145
PB.88823.1092	Nop58	Nop58-S-1092	ISM	0.0537793	0.0824525	0.0595801
PB.10295.1693	Atp5b	Atp5b-S-1693	ISM	0.0212592	0.0767832	0.0767832
PB.112436.83	Ap1ar	Ap1ar-S-83	ISM	0.00306484	0.102045	0.0936954
PB.59869.29	Dppa4	Dppa4-S-29	ISM	0.0122034	0.0391284	0.0624679
PB.157404.1248	Eif3c	Eif3c-S-1248	ISM	0.0152311	0.00916647	0.0242596
PB.58819.959	Eif4g1	Eif4g1-S-959	ISM	0	0.0212592	0.0122034
PB.48213.440	Cct5	Cct5-S-440	ISM	0.00612031	0.0272511	0.0391284
PB.174586.936	Scaper	Scaper-S-936	ISM	0	0.0272511	0.0391284
PB.84899.159	Rnf2	Rnf2-S-159	ISM	0	0.0182497	0.0361723
PB.173759.295	Ei24	Ei24-S-295	FSM	0.0152311	0.0182497	0.0391284
PB.129017.79	Slc2a1	Slc2a1-S-79	ISM	0	0.0302337	0.00916647
PB.95363.114	Mvb12b	Mvb12b-S-114	NNC	0.0272511	0.0152311	0.0152311
PB.147184.382	Bcat1	Bcat1-S-382	ISM	0	0.0152311	0.0152311
PB.68743.357	Slc39a6	Slc39a6-S-357	ISM	0.0122034	0.0508662	0.0682187
PB.115408.71	Mme	Mme-S-71	FSM	0	0.0272511	0.00916647
PB.66128.93	B230354K17Rik	B230354K17Rik-S-93	FSM	0	0.0537793	0.0595801
PB.71970.61	Elp2	Elp2-S-61	ISM	0	0.0152311	0.00306484
PB.156412.194	Nup98	Nup98-S-194	ISM	0	0.0391284	0.0624679
PB.107971.255	Mtg2	Mtg2-S-255	NIC	0.0182497	0.00612031	0
PB.44045.144	Pbrm1	Pbrm1-S-144	ISM	0	0.00612031	0.0272511
PB.123188.535	Kdm4a	Kdm4a-S-535	ISM	0	0.00916647	0.0182497
PB.104294.188	Nup35	Nup35-S-188	ISM	0.00306484	0.0361723	0.0302337
PB.180554.318	Ccpg1	Ccpg1-S-318	FSM	0.0182497	0.0122034	0.0212592
PB.95157.222	Dolk	Dolk-S-222	FSM	0.0212592	0.00306484	0.0152311
PB.15367.171	Prpsap1	Prpsap1-S-171	FSM	0.0182497	0.163846	0.222049
PB.140326.16	Tchp	Tchp-S-16	ISM	0.0796219	0.248731	0.293206
PB.97474.233	Hsd17b12	Hsd17b12-S-233	ISM	0.00306484	0.00306484	0.0182497
PB.89271.573	Xrcc5	Xrcc5-S-573	ISM	0	0.0212592	0.00916647
PB.248.214	Sash1	Sash1-S-214	ISM	0	0.00916647	0.0212592
PB.102390.413	Fubp3	Fubp3-S-413	ISM	0.00306484	0.110326	0.107574
PB.157404.881	Atxn2l	Atxn2l-S-881	ISM	0	0.0964865	0.126685
PB.126349.32	Melk	Melk-S-32	ISM	0.0182497	0.104813	0.150732
PB.114029.14	Tbl1xr1	Tbl1xr1-S-14	ISM	0.00916647	0.0682187	0.0796219
PB.126661.24	Smc2	Smc2-S-24	ISM	0.0739365	0.110326	0.104813
PB.14417.1207	Npepps	Npepps-S-1207	ISM	0	0.0212592	0.0122034
PB.8600.779	Eef2	Eef2-S-779	ISM	0.0420758	0.344524	0.413839
PB.19114.52	Acaca	Acaca-S-52	NIC	0	0.0212592	0.00612031
PB.47572.162	Skp2	Skp2-S-162	ISM	0.00306484	0.0653474	0.0624679
PB.72408.7	Ik	Ik-S-7	ISM	0.0242596	0.174215	0.155999
PB.70500.131	4930503L19Rik	4930503L19Rik-S-131	FSM	0	0.0152311	0.0182497
PB.50754.643	Slc38a2	Slc38a2-S-643	ISM	0	0.0152311	0.00612031
PB.136603.311	Slc25a40	Slc25a40-S-311	ISM	0.0122034	0.0796219	0.0767832
PB.149364.4	Tax1bp1	Tax1bp1-S-4	ISM	0.0332074	0.153369	0.142781
PB.43934.304	Tasor	Tasor-S-304	ISM	0.0122034	0.0566839	0.104813
PB.184547.108	Pls3	Pls3-S-108	ISM	0.00306484	0.0212592	0.0152311
PB.141007.1007	Cct6a	Cct6a-S-1007	ISM	0	0.0152311	0.00306484
PB.101393.31	Kin	Kin-S-31	FSM	0.0964865	0.288616	0.376627
PB.161519.451	Stim1	Stim1-S-451	ISM	0	0.150732	0.155999
PB.14056.177	Brip1	Brip1-S-177	ISM	0.00306484	0.00306484	0.0182497
PB.2472.2881	Tet1	Tet1-S-2881	FSM	0	0.00916647	0.0302337
PB.82001.659	Ndufs1	Ndufs1-S-659	ISM	0	0.0653474	0.0682187
PB.74569.593	Mark2	Mark2-S-593	ISM	0	0.0152311	0
PB.111804.205	Rap1a	Rap1a-S-205	ISM	0.00306484	0.00916647	0.0152311
PB.172439.6	Zc3h18	Zc3h18-S-6	ISM	0.0122034	0.153369	0.21712
PB.182144.26	Map4	Map4-S-26	ISM	0	0.0361723	0.0391284
PB.23220.816	Mis18bp1	Mis18bp1-S-816	ISM	0.0302337	0.0242596	0.0122034
PB.115244.346	Eif2a	Eif2a-S-346	ISM	0.00612031	0.0212592	0.0152311
PB.40885.381	Psmb5	Psmb5-S-381	FSM	0.00306484	0.00916647	0.0212592
PB.2979.168	Smarcb1	Smarcb1-S-168	ISM	0	0.0152311	0.0122034
PB.169674.18	Cfap97	Cfap97-S-18	FSM	0	0.0302337	0.0361723
PB.135184.187	Ubc	Ubc-S-187	NNC	0	0.0212592	0.0122034
PB.169603.14	Fat1	Fat1-S-14	ISM	0	0.0152311	0.0302337
PB.33043.84	Aggf1	Aggf1-S-84	FSM	0	0.0182497	0.0182497
PB.157164.55	Cdr2	Cdr2-S-55	FSM	0.00916647	0.0450145	0.0272511
PB.137727.42	Grpel1	Grpel1-S-42	FSM	0	0	0.0182497
PB.180078.2691	Tipin	Tipin-S-2691	ISM	0.00306484	0.0152311	0.0152311
PB.158472.282	Zscan4c	Zscan4c-S-282	NIC	0	0.0212592	0.00916647
PB.65313.522	Srrm2	Srrm2-S-522	ISM	0.00612031	0.0624679	0.0824525
PB.186564.211	Gnl3l	Gnl3l-S-211	ISM	0.00306484	0.0964865	0.115809
PB.85609.109	Nuf2	Nuf2-S-109	FSM	0	0.0391284	0.0152311
PB.176073.644	Syncrip	Syncrip-S-644	ISM	0	0.0450145	0.0537793
PB.149823.341	Serbp1	Serbp1-S-341	ISM	0.0302337	0.0880898	0.0796219
PB.139991.1554	Mtf2	Mtf2-S-1554	ISM	0	0.0122034	0.0152311
PB.153771.91	Fam98c	Fam98c-S-91	FSM	0.00306484	0.0566839	0.0508662
PB.144796.134	Mrpl35	Mrpl35-S-134	FSM	0.0152311	0.0302337	0.0992699
PB.146363.49	Zfp422	Zfp422-S-49	FSM	0.00306484	0.0332074	0.0272511
PB.146216.302	Tada3	Tada3-S-302	FSM	0	0.0152311	0.0242596
PB.130836.186	Dbf4	Dbf4-S-186	FSM	0	0.0152311	0.00612031
PB.57211.95	Arl13b	Arl13b-S-95	ISM	0.0122034	0.0450145	0.0537793
PB.44568.54	Socs4	Socs4-S-54	FSM	0	0.0122034	0.0272511
PB.133198.344	Ppat	Ppat-S-344	ISM	0	0.0122034	0.0361723
PB.51040.370	Cbx5	Cbx5-S-370	ISM	0	0.00306484	0.0152311
PB.178011.22	Taf1d	Taf1d-S-22	NIC	0.00306484	0.0420758	0.0767832
PB.166549.278	Aktip	Aktip-S-278	ISM	0	0.00916647	0.0212592
PB.41496.355	Ppp2r2a	Ppp2r2a-S-355	ISM	0.0420758	0.311356	0.370289
PB.167290.931	Ddx19a	Ddx19a-S-931	ISM	0.00306484	0.0182497	0.0182497
PB.77465.1028	Hnrnpul2	Hnrnpul2-S-1028	ISM	0	0.0122034	0.0182497
PB.114438.13	Ttc14	Ttc14-S-13	ISM	0.0122034	0.0182497	0.0302337
PB.28327.1381	Rbm25	Rbm25-S-1381	ISM	0	0.0152311	0.0212592
PB.145750.270	Tmf1	Tmf1-S-270	ISM	0.0122034	0.0391284	0.0479447
PB.140719.169	Kntc1	Kntc1-S-169	ISM	0	0.0242596	0.0242596
PB.23322.642	Map4k5	Map4k5-S-642	ISM	0.00306484	0.0212592	0.0212592
PB.40820.674	Hnrnpc	Hnrnpc-S-674	ISM	0.222049	0.780137	0.799643
PB.12078.231	Sqstm1	Sqstm1-S-231	ISM	0	0.0361723	0.0824525
PB.123765.1679	Zbtb8a	Zbtb8a-S-1679	FSM	0.0450145	0.0682187	0.0852751
PB.33097.218	Hmgcr	Hmgcr-S-218	ISM	0.192105	1.07106	1.1421
PB.50869.230	Racgap1	Racgap1-S-230	ISM	0.0152311	0.158621	0.153369
PB.161916.116	Far1	Far1-S-116	ISM	0.00612031	0.0537793	0.118539
PB.82549.265	Farsb	Farsb-S-265	ISM	0.00306484	0.0152311	0.0122034
PB.66634.18	Hdgfl2	Hdgfl2-S-18	ISM	0.00306484	0.0852751	0.0767832
PB.59491.136	Hspbap1	Hspbap1-S-136	ISM	0	0.0212592	0.0122034
PB.25176.1363	Hsp90aa1	Hsp90aa1-S-1363	NNC	0	0.0182497	0.00306484
PB.131986.303	Lrpap1	Lrpap1-S-303	ISM	0.00306484	0.0272511	0.0152311
PB.101137.66	Frmd4a	Frmd4a-S-66	ISM	0	0.00916647	0.0242596
PB.70180.272	Txnl1	Txnl1-S-272	ISM	0.00612031	0.0212592	0.0302337
PB.176555.559	Cdv3	Cdv3-S-559	ISM	0.00916647	0.150732	0.0653474
PB.32286.1149	Cast	Cast-S-1149	ISM	0	0.0242596	0.0479447
PB.61923.502	Zfp945	Zfp945-S-502	FSM	0	0.0152311	0.00306484
PB.25176.1793	Hsp90aa1	Hsp90aa1-S-1793	NIC	0.00306484	0.0272511	0.0272511
PB.156879.201	Copb1	Copb1-S-201	ISM	0	0.0212592	0.0152311
PB.146031.134	Crbn	Crbn-S-134	FSM	0.00612031	0.123977	0.126685
PB.185572.185	Rps6ka6	Rps6ka6-S-185	NIC	0.00306484	0.0152311	0.0242596
PB.25176.1101	Hsp90aa1	Hsp90aa1-S-1101	ISM	0.214647	0.202187	0.171633
PB.91384.1671	Kdm5b	Kdm5b-S-1671	NNC	0.00306484	0.0212592	0.0182497
PB.14677.1287	Brca1	Brca1-S-1287	ISM	0	0.0450145	0.0302337
PB.157281.34	Zkscan2	Zkscan2-S-34	ISM	0	0.0242596	0.00916647
PB.41029.60	Cenpj	Cenpj-S-60	ISM	0.00612031	0.00916647	0.0152311
PB.103807.170	Ssb	Ssb-S-170	FSM	0.174215	0.27705	0.359634
PB.174392.342	Nkapd1	Nkapd1-S-342	ISM	0	0.00306484	0.0152311
PB.157650.338	Dhx32	Dhx32-S-338	ISM	0.00306484	0.0272511	0.0152311
PB.191602.240	Bclaf3	Bclaf3-S-240	ISM	0.0242596	0.0936954	0.107574
PB.129763.1125	Luzp1	Luzp1-S-1125	ISM	0.0796219	0.331389	0.331389
PB.108027.57	Rtel1	Rtel1-S-57	ISM	0	0.0332074	0.0272511
PB.45416.7	Pbk	Pbk-S-7	ISM	0	0.0152311	0.0182497
PB.3541.168	Rtcb	Rtcb-S-168	ISM	0	0.0420758	0.0624679
PB.168081.822	Rbm34	Rbm34-S-822	FSM	0.717733	0.401588	0.368167
PB.141463.2	Zkscan1	Zkscan1-S-2	FSM	0.0152311	0.0908965	0.113071
PB.102304.1494	Sptan1	Sptan1-S-1494	ISM	0.00306484	0.0710817	0.0880898
PB.78666.542	Kif11	Kif11-S-542	ISM	0.00306484	0.0566839	0.0302337
PB.126219.17	Chmp5	Chmp5-S-17	ISM	0.0182497	0.272385	0.539531
PB.31758.1441	Hnrnpk	Hnrnpk-S-1441	ISM	0.00306484	0.00916647	0.0152311
PB.81683.1523	Hspd1	Hspd1-S-1523	ISM	0	0.0212592	0.00612031
PB.165118.169	Cep44	Cep44-S-169	FSM	0	0.00612031	0.0182497
PB.191173.425	Alg13	Alg13-S-425	ISM	0	0.0122034	0.0152311
PB.2639.230	Cdk1	Cdk1-S-230	ISM	0.00612031	0.0566839	0.0361723
PB.130612.105	Cdk11b	Cdk11b-S-105	NIC	0	0.0152311	0.0242596
PB.146476.167	Ccdc77	Ccdc77-S-167	ISM	0.00306484	0.0479447	0.0595801
PB.148432.5	Cald1	Cald1-S-5	ISM	0.0242596	0.0992699	0.0852751
PB.44585.321	Ktn1	Ktn1-S-321	ISM	0	0.00306484	0.0152311
PB.116357.1085	Tpm3	Tpm3-S-1085	ISM	0.0122034	0.0595801	0.0566839
PB.29727.1312	Gtpbp4	Gtpbp4-S-1312	ISM	0.00916647	0.0242596	0.0391284
PB.171519.2	Nup93	Nup93-S-2	ISM	0	0.0302337	0.0824525
PB.114596.2	Zfp267	Zfp267-S-2	FSM	0.00306484	0.0272511	0.0479447
PB.20862.9	Rptor	Rptor-S-9	ISM	0	0.0152311	0.00306484
PB.47623.114	Dnajc21	Dnajc21-S-114	ISM	0.00612031	0.0242596	0.0182497
PB.93689.458	Eprs	Eprs-S-458	ISM	0.00306484	0.0450145	0.0767832
PB.151646.202	Hnrnpf	Hnrnpf-S-202	FSM	0	0.00916647	0.0152311
PB.74159.4	Zadh2	Zadh2-S-4	FSM	0.0212592	0.00306484	0.00306484
PB.82753.1795	Trip12	Trip12-S-1795	NNC	0.00306484	0.0450145	0.0450145
PB.155891.399	Eed	Eed-S-399	ISM	0.0122034	0.0508662	0.0566839
PB.18123.1077	Pigl	Pigl-S-1077	NNC	0.0880898	0.0391284	0.0537793
PB.82262.233	Bard1	Bard1-S-233	ISM	0.0182497	0.129386	0.129386
PB.14494.368	Med1	Med1-S-368	FSM	0.0152311	0.00306484	0.0182497
PB.54651.57	Eif4b	Eif4b-S-57	ISM	0.00306484	0.0122034	0.0508662
PB.162691.7	Htra1	Htra1-S-7	FSM	0	0.0212592	0.0122034
PB.62488.254	Slc39a7	Slc39a7-S-254	NIC	0.0242596	0.00306484	0
PB.19901.32	Tubg1	Tubg1-S-32	ISM	0	0.00306484	0.0152311
PB.69111.294	Epb41l4a	Epb41l4a-S-294	ISM	0.00306484	0.0242596	0.0242596
PB.83676.269	Tsn	Tsn-S-269	FSM	0.00916647	0.0767832	0.0964865
PB.33366.145	Ppwd1	Ppwd1-S-145	FSM	0.0152311	0.0880898	0.0450145
PB.111256.427	Setdb1	Setdb1-S-427	ISM	0	0.00916647	0.0212592
PB.9495.1225	Pawr	Pawr-S-1225	ISM	0.00916647	0.0508662	0.0479447
PB.145510.52	Xpc	Xpc-S-52	ISM	0.0391284	0.0624679	0.0566839
PB.14212.233	Luc7l3	Luc7l3-S-233	FSM	0.00306484	0.0122034	0.0361723
PB.145391.364	Mcm2	Mcm2-S-364	ISM	0	0.0420758	0.0479447
PB.89843.37	Psmd1	Psmd1-S-37	ISM	0	0.0212592	0.0242596
PB.25057.342	Setd3	Setd3-S-342	ISM	0.00306484	0.0152311	0.0242596
PB.62949.3143	Hsp90ab1	Hsp90ab1-S-3143	ISM	0	0.0122034	0.0152311
PB.51147.3	Prkaa1	Prkaa1-S-3	ISM	0	0.0182497	0.0122034
PB.114392.4	Mfn1	Mfn1-S-4	ISM	0.00916647	0.0710817	0.115809
PB.14003.249	Ggnbp2	Ggnbp2-S-249	ISM	0	0.0302337	0.00916647
PB.123980.202	Maco1	Maco1-S-202	ISM	0.00916647	0.121262	0.184477
PB.12260.520	Rad50	Rad50-S-520	ISM	0.0272511	0.253507	0.231834
PB.176740.632	Gnai2	Gnai2-S-632	FSM	0	0.0182497	0.0272511
PB.115244.314	Eif2a	Eif2a-S-314	ISM	0.00916647	0.0595801	0.0653474
PB.83165.278	Ndufa10	Ndufa10-S-278	ISM	0.00306484	0.00612031	0.0566839
PB.171830.2083	Vps4a	Vps4a-S-2083	ISM	0.0182497	0.0767832	0.187026
PB.169307.43	Prag1	Prag1-S-43	ISM	0	0.0152311	0.00916647
PB.11178.92	Pex13	Pex13-S-92	ISM	0	0.0212592	0.0212592
PB.48315.354	Stk3	Stk3-S-354	ISM	0	0.0332074	0.0391284
PB.65015.75	Tcp1	Tcp1-S-75	ISM	0.0653474	0.0566839	0.0595801
PB.147411.751	Sinhcaf	Sinhcaf-S-751	ISM	0.0122034	0.137444	0.153369
PB.104065.1699	Agps	Agps-S-1699	ISM	0	0.0767832	0.0420758
PB.181446.15	Atr	Atr-S-15	ISM	0.00306484	0.0332074	0.0479447
PB.173085.244	Cep57	Cep57-S-244	ISM	0	0.0182497	0.0152311
PB.50027.769	St13	St13-S-769	ISM	0.00612031	0.118539	0.0992699
PB.123496.100	Utp11	Utp11-S-100	ISM	0	0.00916647	0.0182497
PB.171347.2	Cyld	Cyld-S-2	ISM	0.00612031	0.0739365	0.121262
PB.10296.379	Timeless	Timeless-S-379	ISM	0	0	0.0182497
PB.12431.203	Fam114a2	Fam114a2-S-203	NNC	0.00916647	0.0242596	0.0332074
PB.50846.1966	Tuba1a	Tuba1a-S-1966	FSM	0	0.0479447	0.0624679
PB.136296.485	Hmgb1	Hmgb1-S-485	ISM	0.00306484	0.0212592	0.0332074
PB.179495.16	Idh3a	Idh3a-S-16	ISM	0	0.0420758	0.0479447
PB.62409.1419	Akap8l	Akap8l-S-1419	ISM	0.0122034	0.0767832	0.0653474
PB.140779.320	Kmt5a	Kmt5a-S-320	ISM	0.00612031	0.0682187	0.0767832
PB.3541.170	Rtcb	Rtcb-S-170	ISM	0.00612031	0.0624679	0.0964865
PB.96517.281	Lrp2	Lrp2-S-281	ISM	0	0.0152311	0.00916647
PB.91707.357	Uchl5	Uchl5-S-357	ISM	0.0391284	0.214647	0.243933
PB.85609.116	Nuf2	Nuf2-S-116	ISM	0	0.0566839	0.0391284
PB.158472.665	Zscan4f	Zscan4f-S-665	NIC	0	0.0152311	0.0182497
PB.159022.1225	Zfp60	Zfp60-S-1225	FSM	0.00612031	0.00612031	0.0212592
PB.112999.361	Hs2st1	Hs2st1-S-361	FSM	0	0.0739365	0.0710817
PB.77470.2019	Ahnak	Ahnak-S-2019	FSM	0	0.0242596	0.0212592
PB.65769.20	Wdr46	Wdr46-S-20	ISM	0	0.0182497	0.0361723
PB.138256.16	Pi4k2b	Pi4k2b-S-16	ISM	0	0.0361723	0.0361723
PB.3862.753	Tmpo	Tmpo-S-753	ISM	0.0624679	0.504937	0.486237
PB.140342.23	Pxn	Pxn-S-23	ISM	0	0.0391284	0.0212592
PB.172621.28	Kcnk1	Kcnk1-S-28	ISM	0	0.0152311	0.0182497
PB.129696.253	Syf2	Syf2-S-253	ISM	0	0.0152311	0.0391284
PB.162206.253	Mettl9	Mettl9-S-253	ISM	0.0152311	0.0566839	0.0964865
PB.74552.135	Plcb3	Plcb3-S-135	NIC	0	0.0302337	0.0566839
PB.53838.105	Samm50	Samm50-S-105	ISM	0	0.0182497	0.00916647
PB.14727.327	Ubtf	Ubtf-S-327	ISM	0.0152311	0.0824525	0.0653474
PB.132829.203	Rfc1	Rfc1-S-203	ISM	0	0.0122034	0.0212592
PB.57270.102	4930453N24Rik	4930453N24Rik-S-102	FSM	0	0.0361723	0.0537793
PB.100439.351	Zmynd8	Zmynd8-S-351	FSM	0.0450145	0.0450145	0.0739365
PB.171988.630	Terf2ip	Terf2ip-S-630	FSM	0.00306484	0.0152311	0.0272511
PB.142479.463	Asns	Asns-S-463	ISM	0	0.0272511	0.0566839
PB.21878.612	Rps7	Rps7-S-612	ISM	0.0682187	0.121262	0.155999
PB.137818.116	Lyar	Lyar-S-116	ISM	0.623588	1.35564	1.38986
PB.106952.20	Aar2	Aar2-S-20	ISM	0.0361723	0.0152311	0.0242596
PB.116954.15	Sike1	Sike1-S-15	ISM	0	0.00306484	0.0212592
PB.33352.366	Srek1	Srek1-S-366	ISM	0	0.00612031	0.0182497
PB.168803.49	Kat6a	Kat6a-S-49	ISM	0	0.0152311	0.0122034
PB.84969.1643	Dhx9	Dhx9-S-1643	ISM	0.0508662	0.417889	0.514157
PB.84969.1347	Dhx9	Dhx9-S-1347	ISM	0.00612031	0.0391284	0.0391284
PB.125688.244	Usp45	Usp45-S-244	ISM	0	0.0624679	0.129386
PB.171180.137	Palm3	Palm3-S-137	NIC	0	0.00306484	0.0182497
PB.107506.7	Ddx27	Ddx27-S-7	ISM	0.102045	0.311356	0.368167
PB.177433.96	Zfp445	Zfp445-S-96	FSM	0	0.0182497	0.0212592
PB.60201.14	Cpox	Cpox-S-14	ISM	0.00306484	0.0152311	0.00916647
PB.111264.884	Prpf3	Prpf3-S-884	ISM	0.00306484	0.0450145	0.0566839
PB.64287.175	Lrpprc	Lrpprc-S-175	ISM	0	0.0242596	0.0302337
PB.402.1262	Utrn	Utrn-S-1262	ISM	0.00612031	0.0964865	0.0992699
PB.147411.372	Caprin2	Caprin2-S-372	ISM	0.0182497	0.0566839	0.0537793
PB.105895.3	Polr1b	Polr1b-S-3	ISM	0.00612031	0.0391284	0.0508662
PB.65342.690	Eci1	Eci1-S-690	ISM	0	0.00612031	0.0152311
PB.164628.662	Frg1	Frg1-S-662	ISM	0.0796219	0.335786	0.297774
PB.65940.12	Znrd1as	Znrd1as-S-12	FSM	0.00612031	0.0420758	0.0796219
PB.65940.21	Znrd1as	Znrd1as-S-21	FSM	0.00612031	0.00916647	0.0420758
PB.157404.3479	Aldoa	Aldoa-S-3479	ISM	0	0.0852751	0.0767832
PB.31690.340	H2afy	H2afy-S-340	NIC	0.00306484	0.0332074	0.0391284
PB.2463.150	Hk1	Hk1-S-150	ISM	0.0122034	0.207189	0.265348
PB.15609.364	P4hb	P4hb-S-364	ISM	0.00306484	0.00612031	0.0242596
PB.139332.60	Utp3	Utp3-S-60	FSM	0.0964865	0.478658	0.478658
PB.118487.1	Znhit6	Znhit6-S-1	ISM	0.00306484	0.0391284	0.0653474
PB.95942.129	Stam2	Stam2-S-129	ISM	0.00612031	0.0391284	0.0479447
PB.153261.1056	Arhgap35	Arhgap35-S-1056	ISM	0	0.00306484	0.0242596
PB.40820.657	Hnrnpc	Hnrnpc-S-657	ISM	0.00612031	0.0302337	0.0361723
PB.99875.121	Gss	Gss-S-121	ISM	0.0152311	0.246335	0.248731
PB.121293.306	Cdk5rap2	Cdk5rap2-S-306	ISM	0.00306484	0.0302337	0.0450145
PB.47544.1004	Nipbl	Nipbl-S-1004	ISM	0	0.0152311	0.00306484
PB.164258.300	Mak16	Mak16-S-300	ISM	0.0242596	0.142781	0.123977
PB.178504.1030	Nfrkb	Nfrkb-S-1030	NIC	0	0	0.0152311
PB.105945.5	Nop56	Nop56-S-5	ISM	0.0122034	0.150732	0.209681
PB.63009.334	Ptk7	Ptk7-S-334	ISM	0	0.00612031	0.0152311
PB.52202.333	Oxr1	Oxr1-S-333	ISM	0	0.0212592	0.0152311
PB.86443.566	Cenpf	Cenpf-S-566	ISM	0.0122034	0.0152311	0.0212592
PB.104280.20	Dnajc10	Dnajc10-S-20	ISM	0.00306484	0.00612031	0.0182497
PB.167310.725	Cfdp1	Cfdp1-S-725	ISM	0.0302337	0.284006	0.265348
PB.15750.13	Sf3a1	Sf3a1-S-13	ISM	0.00306484	0.00306484	0.0152311
PB.82753.1260	Trip12	Trip12-S-1260	ISM	0	0.0152311	0.0152311
PB.120857.491	Ctnnal1	Ctnnal1-S-491	ISM	0	0.0242596	0.00306484
PB.18594.108	Mybbp1a	Mybbp1a-S-108	ISM	0	0.00916647	0.0182497
PB.144208.39	Ggct	Ggct-S-39	ISM	0.00306484	0.0152311	0.0242596
PB.36319.7	Syk	Syk-S-7	NIC	0	0.0332074	0.0566839
PB.31963.185	Ctsl	Ctsl-S-185	ISM	0	0.0391284	0.0212592
PB.44887.20	Nop9	Nop9-S-20	ISM	0.00612031	0.00916647	0.0242596
PB.173085.390	Cep57	Cep57-S-390	ISM	0.0242596	0.212167	0.270045
PB.115584.62	Schip1	Schip1-S-62	ISM	0	0.0361723	0.0272511
PB.8661.58	Washc4	Washc4-S-58	ISM	0	0.0152311	0.00612031
PB.112107.115	Agl	Agl-S-115	ISM	0.00612031	0.0152311	0.0122034
PB.33747.372	Mtrex	Mtrex-S-372	ISM	0.0152311	0.0361723	0.0391284
PB.27121.98	Arhgap5	Arhgap5-S-98	NNC	0	0.0624679	0.0566839
PB.108750.345	Ect2	Ect2-S-345	NIC	0.00612031	0.0508662	0.0566839
PB.41969.122	Wbp4	Wbp4-S-122	ISM	0.00306484	0.0182497	0.0152311
PB.125688.579	Pnisr	Pnisr-S-579	NIC	0	0.00306484	0.0152311
PB.171207.2788	Man2b1	Man2b1-S-2788	ISM	0.00916647	0.0880898	0.132079
PB.140446.271	Taok3	Taok3-S-271	ISM	0.00306484	0.0152311	0.0182497
PB.19605.481	Spop	Spop-S-481	ISM	0.00306484	0.0122034	0.0242596
PB.191377.62	Kdm5c	Kdm5c-S-62	ISM	0.00306484	0.0212592	0.0152311
PB.124287.257	Mrto4	Mrto4-S-257	ISM	0	0.00916647	0.0212592
PB.81683.1456	Hspd1	Hspd1-S-1456	ISM	0.262991	1.36665	1.48393
PB.62949.4678	Mymx	Mymx-S-4678	FSM	0.0796219	0.0566839	0.0391284
PB.151646.1023	Hnrnpf	Hnrnpf-S-1023	FSM	0	0.0420758	0.0302337
PB.185477.213	Brwd3	Brwd3-S-213	ISM	0	0.00916647	0.0302337
PB.151646.279	Hnrnpf	Hnrnpf-S-279	FSM	0.0361723	0.229397	0.546664
PB.139303.37	Ythdc1	Ythdc1-S-37	ISM	0.00612031	0.0391284	0.0302337
PB.87139.82	Terf1	Terf1-S-82	ISM	0	0.0272511	0.0182497
PB.37770.31	Col4a3bp	Col4a3bp-S-31	ISM	0.00306484	0.00916647	0.0302337
PB.15750.19	Sf3a1	Sf3a1-S-19	ISM	0	0.0152311	0.00916647
PB.80046.145	Mybl1	Mybl1-S-145	ISM	0.00306484	0.0479447	0.0595801
PB.147193.102	Kras	Kras-S-102	FSM	0.140116	0.688868	0.539531
PB.102304.647	Odf2	Odf2-S-647	ISM	0	0.0361723	0.0212592
PB.54535.15	Smarcd1	Smarcd1-S-15	ISM	0.00306484	0.0152311	0.0242596
PB.65523.36	Def6	Def6-S-36	ISM	0	0.0242596	0.0212592
PB.40820.752	Hnrnpc	Hnrnpc-S-752	ISM	0.0302337	0.209681	0.199676
PB.3862.470	Slc25a3	Slc25a3-S-470	ISM	0	0.00306484	0.0152311
PB.181570.5	Copb2	Copb2-S-5	ISM	0.0152311	0.0332074	0.0710817
PB.76083.7	Blnk	Blnk-S-7	ISM	0.0391284	0.0182497	0.0272511
PB.65900.216	Mdc1	Mdc1-S-216	NIC	0	0.0182497	0.0212592
PB.149247.468	Snx10	Snx10-S-468	ISM	0.00306484	0.0212592	0.0479447
PB.31329.375	Nup153	Nup153-S-375	ISM	0	0.0242596	0.0212592
PB.84205.615	Mdm4	Mdm4-S-615	NIC	0	0.0122034	0.0450145
PB.145076.169	Mthfd2	Mthfd2-S-169	ISM	0.00306484	0.00306484	0.0152311
PB.131616.186	Paxip1	Paxip1-S-186	ISM	0.00612031	0.0242596	0.00916647
PB.4610.214	Tbc1d15	Tbc1d15-S-214	ISM	0.0182497	0.115809	0.121262
PB.64018.597	Cebpz	Cebpz-S-597	ISM	0.00612031	0.0182497	0.00916647
PB.126789.17	Rad23b	Rad23b-S-17	ISM	0.00612031	0.0272511	0.0391284
PB.32286.1180	Cast	Cast-S-1180	ISM	0	0.0420758	0.0450145
PB.13849.66	Pex12	Pex12-S-66	NIC	0.0152311	0.0152311	0.00612031
PB.17233.20	Slu7	Slu7-S-20	ISM	0	0.0479447	0.0420758
PB.10297.202	Cs	Cs-S-202	ISM	0	0.00612031	0.0152311
PB.90017.130	Lrrfip1	Lrrfip1-S-130	ISM	0	0.0302337	0.0182497
PB.63278.224	Sgo1	Sgo1-S-224	ISM	0.0182497	0.0936954	0.0936954
PB.72408.13	Ik	Ik-S-13	ISM	0.0880898	0.113071	0.104813
PB.171172.5	Asf1b	Asf1b-S-5	ISM	0	0.0152311	0.0242596
PB.13504.55	Gemin4	Gemin4-S-55	FSM	0	0.0152311	0.0122034
PB.123395.448	Cap1	Cap1-S-448	ISM	0.00916647	0.0272511	0.0302337
PB.118481.20	Odf2l	Odf2l-S-20	ISM	0.00306484	0.0122034	0.0152311
PB.123318.305	Ctps	Ctps-S-305	ISM	0.00306484	0.0479447	0.0122034
PB.150338.308	Nfu1	Nfu1-S-308	ISM	0	0.0242596	0.0595801
PB.119497.399	Wwp1	Wwp1-S-399	ISM	0.00306484	0.0272511	0.0302337
PB.31820.156	Agtpbp1	Agtpbp1-S-156	ISM	0	0.0212592	0.0152311
PB.108040.10	Prpf6	Prpf6-S-10	ISM	0.161237	0.391263	0.623588
PB.65452.404	Bnip1	Bnip1-S-404	ISM	0.00306484	0.00306484	0.0152311
PB.49843.445	Myh9	Myh9-S-445	ISM	0	0.0332074	0.0479447
PB.112656.161	Tet2	Tet2-S-161	ISM	0	0	0.0152311
PB.179403.8	Poglut3	Poglut3-S-8	ISM	0	0.0152311	0.00306484
PB.123160.1091	Kif2c	Kif2c-S-1091	ISM	0	0.0182497	0.00612031
PB.131735.105	Preb	Preb-S-105	FSM	0.00306484	0.0212592	0
PB.66964.88	Fer	Fer-S-88	ISM	0	0.0508662	0.0450145
PB.13504.49	Gemin4	Gemin4-S-49	FSM	0.00916647	0.0332074	0.0361723
PB.83533.208	Kdsr	Kdsr-S-208	ISM	0	0.0272511	0.0152311
PB.116770.25	Gdap2	Gdap2-S-25	ISM	0.00306484	0.0122034	0.0182497
PB.170860.5	Hmgxb4	Hmgxb4-S-5	ISM	0.0739365	0.21712	0.270045
PB.131922.478	Nop14	Nop14-S-478	ISM	0.140116	0.606998	0.569501
PB.155891.465	Eed	Eed-S-465	ISM	0	0.0302337	0.0272511
PB.17233.3	Slu7	Slu7-S-3	ISM	0.0653474	0.0936954	0.110326
PB.140719.145	Kntc1	Kntc1-S-145	ISM	0	0.00916647	0.0182497
PB.36394.287	Faf2	Faf2-S-287	ISM	0.00612031	0.0152311	0.0122034
PB.151519.3	Fancd2	Fancd2-S-3	ISM	0	0.0152311	0.0182497
PB.131909.655	Slbp	Slbp-S-655	FSM	0	0.0767832	0.0880898
PB.51103.54	Oxct1	Oxct1-S-54	ISM	0	0.0212592	0.0242596
PB.22812.253	Hectd1	Hectd1-S-253	ISM	0	0.0152311	0.0182497
PB.178255.343	Ppan	Ppan-S-343	FSM	0.0302337	0.0508662	0.0767832
PB.54667.351	Hnrnpa1	Hnrnpa1-S-351	ISM	0.00612031	0.251122	0.246335
PB.157404.5412	Tbc1d10b	Tbc1d10b-S-5412	FSM	0	0.00612031	0.0152311
PB.89843.11	Psmd1	Psmd1-S-11	ISM	0.748697	0.486237	0.685781
PB.14744.352	Gpatch8	Gpatch8-S-352	ISM	0	0.0242596	0.0653474
PB.72408.31	Ik	Ik-S-31	ISM	0	0.0182497	0.00916647
PB.5328.199	Ppil4	Ppil4-S-199	ISM	0.0479447	0.401588	0.374519
PB.135110.158	Mphosph9	Mphosph9-S-158	ISM	0	0.00916647	0.0182497
PB.4659.2259	Cpsf6	Cpsf6-S-2259	ISM	0.00306484	0.0152311	0.0122034
PB.157650.367	Dhx32	Dhx32-S-367	ISM	0	0.0182497	0.00612031
PB.8638.385	Txnrd1	Txnrd1-S-385	ISM	0	0.0242596	0.0391284
PB.115987.8	Map9	Map9-S-8	ISM	0	0.0420758	0.0420758
PB.162871.620	Glrx3	Glrx3-S-620	ISM	0	0.0152311	0.00612031
PB.163912.505	Ckap2	Ckap2-S-505	NNC	0	0.0152311	0.0242596
PB.175195.731	Tpm1	Tpm1-S-731	ISM	0.00612031	0.0272511	0.0302337
PB.129206.1	Mycbp	Mycbp-S-1	FSM	0.0624679	0.0450145	0.134765
PB.27431.13	Mia2	Mia2-S-13	ISM	0	0.0361723	0.0272511
PB.126474.3	Ncbp1	Ncbp1-S-3	ISM	0.0182497	0.161237	0.148089
PB.157404.1228	Eif3c	Eif3c-S-1228	ISM	0.00306484	0.0152311	0.00306484
PB.31072.64	Slc35b3	Slc35b3-S-64	FSM	0	0	0.0152311
PB.3897.76	Nedd1	Nedd1-S-76	ISM	0.0272511	0.115809	0.142781
PB.85290.102	Dars2	Dars2-S-102	ISM	0	0.0391284	0.0624679
PB.14640.366	Dnajc7	Dnajc7-S-366	ISM	0.0212592	0.331389	0.407732
PB.176326.78	Zbtb38	Zbtb38-S-78	FSM	0	0.0122034	0.0242596
PB.10297.188	Cs	Cs-S-188	ISM	0.0122034	0.0122034	0.0302337
PB.149172.19	Mpp6	Mpp6-S-19	NIC	0	0.0182497	0.0122034
PB.45989.8	Sugt1	Sugt1-S-8	ISM	0.126685	0.425941	0.413839
PB.64661.52	Scaf8	Scaf8-S-52	ISM	0	0.0242596	0.00612031
PB.155544.347	Blm	Blm-S-347	ISM	0.0122034	0.0122034	0.0450145
PB.167290.1197	Ddx19b	Ddx19b-S-1197	ISM	0	0.0242596	0.0272511
PB.67681.86	Mta3	Mta3-S-86	ISM	0.00612031	0.134765	0.158621
PB.148245.143	Calu	Calu-S-143	ISM	0.00306484	0.0852751	0.0936954
PB.115618.67	Smc4	Smc4-S-67	ISM	0.00306484	0.0212592	0.0182497
PB.8600.1236	Eef2	Eef2-S-1236	ISM	0	0.0824525	0.0852751
PB.126391.25	Trmt10b	Trmt10b-S-25	ISM	0.0122034	0.0212592	0.0242596
PB.32932.337	Tent2	Tent2-S-337	ISM	0.00306484	0.0152311	0.00612031
PB.124012.207	Clic4	Clic4-S-207	ISM	0.00306484	0.0212592	0.0182497
PB.95438.311	Gapvd1	Gapvd1-S-311	ISM	0	0.0152311	0.00612031
PB.98725.246	Idh3b	Idh3b-S-246	ISM	0.00306484	0.0272511	0.0212592
PB.106988.23	Rpn2	Rpn2-S-23	ISM	0.00306484	0.00916647	0.0152311
PB.49771.249	Puf60	Puf60-S-249	FSM	0.0182497	0.0595801	0.0936954
PB.86443.613	Cenpf	Cenpf-S-613	ISM	0.00612031	0.0450145	0.0450145
PB.164258.256	Mak16	Mak16-S-256	ISM	0.00306484	0.0450145	0.0212592
PB.30353.280	Zscan26	Zscan26-S-280	FSM	0	0.0212592	0.0302337
PB.24809.133	Ppp4r3a	Ppp4r3a-S-133	ISM	0	0.0182497	0.0122034
PB.24944.143	Dicer1	Dicer1-S-143	NNC	0.0122034	0.153369	0.189569
PB.62949.2742	Hsp90ab1	Hsp90ab1-S-2742	ISM	0.0242596	0.0824525	0.145438
PB.61391.438	Ezr	Ezr-S-438	ISM	0.00916647	0.0624679	0.0624679
PB.4659.1141	Cct2	Cct2-S-1141	ISM	0.00306484	0.0361723	0.0479447
PB.137531.4	Zfp512	Zfp512-S-4	ISM	0.00306484	0.0272511	0.107574
PB.4930.105	Tbk1	Tbk1-S-105	ISM	0	0.0122034	0.0182497
PB.144782.148	Kdm3a	Kdm3a-S-148	ISM	0	0.0182497	0.00916647
PB.146562.191	Rimklb	Rimklb-S-191	ISM	0	0.0182497	0.00612031
PB.14968.1077	Nol11	Nol11-S-1077	ISM	0.181921	1.08981	1.1777
PB.133066.132	Usp46	Usp46-S-132	ISM	0	0.00612031	0.0182497
PB.76397.551	Oga	Oga-S-551	ISM	0	0.0332074	0.0212592
PB.93113.469	Cfap45	Cfap45-S-469	ISM	0	0.0152311	0.00916647
PB.33298.580	Rad17	Rad17-S-580	ISM	0.0152311	0.0212592	0.0212592
PB.180115.226	Pdcd7	Pdcd7-S-226	ISM	0.0122034	0.0682187	0.0537793
PB.135113.492	Sbno1	Sbno1-S-492	NIC	0	0.0122034	0.0152311
PB.62409.1066	Akap8	Akap8-S-1066	ISM	0.0122034	0.121262	0.121262
PB.98290.1456	Ubr1	Ubr1-S-1456	ISM	0.00306484	0.0182497	0.00916647
PB.121847.444	Plin2	Plin2-S-444	ISM	0	0.00612031	0.0182497
PB.139098.199	Rest	Rest-S-199	FSM	0	0.0152311	0.00612031
PB.43695.65	Kat6b	Kat6b-S-65	FSM	0	0.0182497	0.00612031
PB.183861.68	Mospd1	Mospd1-S-68	ISM	0.0122034	0.0212592	0.00612031
PB.150194.167	Zfp638	Zfp638-S-167	FSM	0.00612031	0.0479447	0.00916647
PB.180803.72	Ddx43	Ddx43-S-72	ISM	0.0272511	0.229397	0.255886
PB.115449.33	Gmps	Gmps-S-33	ISM	0.224504	1.26976	1.35405
PB.78666.549	Kif11	Kif11-S-549	ISM	0.00306484	0.0212592	0.0212592
PB.189426.6	Dmd	Dmd-S-6	FSM	0.00916647	0.0479447	0.0361723
PB.72343.171	Snhg4	Snhg4-S-171	ISM	0	0.0212592	0.0152311
PB.65719.37	Zfp955b	Zfp955b-S-37	FSM	0.00612031	0.0566839	0.0767832
PB.78666.539	Kif11	Kif11-S-539	ISM	0	0.0302337	0.0479447
PB.82753.1215	Trip12	Trip12-S-1215	NNC	0	0.00306484	0.0152311
PB.79158.4	As3mt	As3mt-S-4	ISM	0	0.0272511	0.0302337
PB.29602.97	Net1	Net1-S-97	ISM	0.00306484	0.0242596	0.0122034
PB.104479.569	Fnbp4	Fnbp4-S-569	ISM	0.0122034	0.255886	0.248731
PB.48914.106	Nudcd1	Nudcd1-S-106	ISM	0	0.0302337	0.0420758
PB.77086.1039	Eif3a	Eif3a-S-1039	ISM	0.27705	1.06367	1.20291
PB.51858.61	Mtdh	Mtdh-S-61	ISM	0.340165	0.838875	1.01703
PB.150547.10	Zxdc	Zxdc-S-10	ISM	0	0.0152311	0.00612031
PB.93689.233	Bpnt1	Bpnt1-S-233	ISM	0.0152311	0.0710817	0.0992699
PB.133566.801	G3bp2	G3bp2-S-801	NNC	0	0.00916647	0.0152311
PB.40885.380	Psmb5	Psmb5-S-380	FSM	0	0.00306484	0.0152311
PB.54347.34	Arid2	Arid2-S-34	ISM	0	0.0152311	0.00916647
PB.148222.2	Snd1	Snd1-S-2	ISM	0	0.0212592	0.0152311
PB.91531.650	Zfp281	Zfp281-S-650	FSM	0	0.0212592	0.0242596
PB.77468.26	Ubxn1	Ubxn1-S-26	ISM	0.0450145	0.361774	0.557269
PB.140333.1005	Coq5	Coq5-S-1005	ISM	0.00916647	0.0767832	0.134765
PB.91005.11	Rab3gap1	Rab3gap1-S-11	ISM	0	0.0302337	0.0361723
PB.128212.388	L1td1	L1td1-S-388	NNC	0	0.0152311	0.0212592
PB.11608.123	Spdl1	Spdl1-S-123	ISM	0	0.00612031	0.0212592
PB.78677.113	Cep55	Cep55-S-113	ISM	0	0.00612031	0.0152311
PB.145187.111	Dusp11	Dusp11-S-111	ISM	0.00306484	0.0391284	0.104813
PB.123354.441	Rlf	Rlf-S-441	FSM	0.0566839	0.171633	0.187026
PB.160854.39	Mesd	Mesd-S-39	ISM	0	0.0272511	0.0739365
PB.100621.10	Zfp64	Zfp64-S-10	NIC	0.0152311	0.0152311	0.0212592
PB.101393.27	Kin	Kin-S-27	FSM	0.00612031	0.0824525	0.0710817
PB.67799.4	Socs5	Socs5-S-4	FSM	0	0.0212592	0.0361723
PB.137352.47	Insig1	Insig1-S-47	ISM	0.00306484	0.0152311	0.00916647
PB.126308.83	Creb3	Creb3-S-83	ISM	0	0.0361723	0.0391284
PB.4659.2228	Cpsf6	Cpsf6-S-2228	FSM	0.0122034	0.0272511	0.0302337
PB.101724.217	Mllt10	Mllt10-S-217	FSM	0.0182497	0.0796219	0.0391284
PB.114560.60	Atp11b	Atp11b-S-60	ISM	0	0.0361723	0.0212592
PB.138892.217	Ociad1	Ociad1-S-217	NIC	0.0182497	0.0739365	0.0852751
PB.40820.660	Hnrnpc	Hnrnpc-S-660	ISM	0.00612031	0.0182497	0.0182497
PB.67853.321	Msh6	Msh6-S-321	ISM	0	0.0182497	0.00612031
PB.185419.851	Atrx	Atrx-S-851	NIC	0.00306484	0	0.0152311
PB.167237.126	Dhx38	Dhx38-S-126	ISM	0	0.0152311	0.00306484
PB.58972.374	Eif4a2	Eif4a2-S-374	ISM	0	0.0391284	0.0152311
PB.68152.516	Kif5b	Kif5b-S-516	ISM	0.00306484	0.171633	0.187026
PB.41877.130	Akap11	Akap11-S-130	NNC	0	0.0152311	0
PB.114694.9	Plk4	Plk4-S-9	FSM	0.00306484	0.0182497	0.0122034
PB.39912.443	Ccdc66	Ccdc66-S-443	ISM	0.00612031	0.0152311	0.0212592
PB.40820.1759	Chd8	Chd8-S-1759	ISM	0	0.0182497	0.0152311
PB.123395.444	Cap1	Cap1-S-444	ISM	0.00612031	0.0152311	0.0332074
PB.125688.251	Usp45	Usp45-S-251	ISM	0	0.0152311	0.0122034
PB.102304.2344	Set	Set-S-2344	ISM	0.0479447	0.290914	0.329182
PB.15325.873	H3f3b	H3f3b-S-873	FSM	0.0182497	0.179359	0.33359
PB.105220.443	Katnbl1	Katnbl1-S-443	ISM	0	0.0122034	0.0182497
PB.5216.580	Akap12	Akap12-S-580	NNC	0	0.0361723	0.0332074
PB.88823.238	Nop58	Nop58-S-238	ISM	0.00916647	0.0152311	0.0182497
PB.123259.1554	Ybx1	Ybx1-S-1554	FSM	0	0.0212592	0.0391284
PB.166320.1068	Asna1	Asna1-S-1068	ISM	0	0.0272511	0.0361723
PB.18824.238	Ssh2	Ssh2-S-238	NIC	0	0	0.0212592
PB.73813.6	Acaa2	Acaa2-S-6	ISM	0	0.0212592	0.0272511
PB.8622.552	Zfp873	Zfp873-S-552	FSM	0.0537793	0.0212592	0.0212592
PB.66645.248	Uhrf1	Uhrf1-S-248	ISM	0	0.0212592	0.0152311
PB.102304.1506	Sptan1	Sptan1-S-1506	ISM	0	0.0450145	0.0624679
PB.22019.42	Prkar2b	Prkar2b-S-42	ISM	0	0.0332074	0.0332074
PB.26195.1	Asap2	Asap2-S-1	ISM	0	0.0182497	0
PB.98080.165	Arhgap11a	Arhgap11a-S-165	ISM	0	0.0508662	0.0767832
PB.140667.12	Ppp1cc	Ppp1cc-S-12	ISM	0.0595801	0.548439	0.621941
PB.106945.90	Cep250	Cep250-S-90	ISM	0	0.0332074	0.0361723
PB.52097.8	Dcaf13	Dcaf13-S-8	ISM	0.00916647	0.0272511	0.0361723
PB.185572.156	Rps6ka6	Rps6ka6-S-156	NIC	0	0.0242596	0.0361723
PB.120276.307	Tln1	Tln1-S-307	ISM	0	0.0182497	0.0152311
PB.124112.240	Kdm1a	Kdm1a-S-240	ISM	0.0450145	0.171633	0.0537793
PB.102305.399	Nup188	Nup188-S-399	ISM	0.00306484	0.0212592	0.0182497
PB.50882.375	Lima1	Lima1-S-375	FSM	0.0152311	0.118539	0.121262
PB.51906.17	Vps13b	Vps13b-S-17	ISM	0.00612031	0.0152311	0.0182497
PB.93127.9	Aim2	Aim2-S-9	ISM	0.0122034	0.0152311	0.0332074
PB.8600.6298	Cactin	Cactin-S-6298	ISM	0	0.0420758	0.0391284
PB.64001.91	Fez2	Fez2-S-91	ISM	0.00306484	0.0152311	0.0182497
PB.151961.273	Phb2	Phb2-S-273	ISM	0	0.0212592	0.0332074
PB.65525.329	Rpl10a	Rpl10a-S-329	NIC	0	0.0182497	0.0182497
PB.54653.958	Sp1	Sp1-S-958	ISM	0.00306484	0.0302337	0.0182497
PB.85495.263	Tiprl	Tiprl-S-263	ISM	0	0.0242596	0.0479447
PB.74757.109	Fen1	Fen1-S-109	FSM	0	0.0212592	0.0272511
PB.77107.97	Zfp950	Zfp950-S-97	FSM	0.0272511	0.0152311	0.0242596
PB.180142.21	Herc1	Herc1-S-21	FSM	0	0.0182497	0.00306484
PB.125915.134	Casp8ap2	Casp8ap2-S-134	ISM	0.0361723	0.187026	0.192105
PB.88823.208	Nop58	Nop58-S-208	ISM	0.00612031	0.0212592	0.0122034
PB.8374.2	Pttg1ip	Pttg1ip-S-2	ISM	0.00612031	0.166449	0.17679
PB.125688.524	Pnisr	Pnisr-S-524	ISM	0.158621	0.65437	0.744331
PB.79097.3	Slf2	Slf2-S-3	ISM	0.00612031	0.113071	0.153369
PB.50174.414	Smc1b	Smc1b-S-414	ISM	0.0537793	0.0566839	0.0420758
PB.2398.273	Eif4ebp2	Eif4ebp2-S-273	ISM	0	0.0152311	0
PB.166833.685	Cnot1	Cnot1-S-685	FSM	0	0.00306484	0.0212592
PB.12344.820	Tnip1	Tnip1-S-820	NIC	0.00306484	0.00612031	0.0242596
PB.175195.771	Tpm1	Tpm1-S-771	ISM	0.00306484	0.0420758	0.0152311
PB.115650.36	Nmd3	Nmd3-S-36	ISM	0	0.0212592	0.0420758
PB.36411.1702	Prelid1	Prelid1-S-1702	ISM	0	0.0122034	0.0212592
PB.123851.593	Ythdf2	Ythdf2-S-593	ISM	0	0.0479447	0.0420758
PB.99704.47	Zcchc3	Zcchc3-S-47	FSM	0.0595801	0.318078	0.302322
PB.35391.8	Nqo2	Nqo2-S-8	FSM	0.0122034	0.0964865	0.0880898
PB.156412.356	Nup98	Nup98-S-356	ISM	0	0.0182497	0.0152311
PB.176503.214	Cep63	Cep63-S-214	ISM	0.0122034	0.0824525	0.0624679
PB.12138.617	Hnrnpab	Hnrnpab-S-617	ISM	0.0880898	0.598598	0.670199
PB.137188.10	Nub1	Nub1-S-10	ISM	0.00306484	0.0796219	0.0964865
PB.105777.5	Slc27a2	Slc27a2-S-5	ISM	0.00916647	0.0537793	0.0566839
PB.88823.1306	Bmpr2	Bmpr2-S-1306	ISM	0	0.0152311	0.0242596
PB.89843.14	Psmd1	Psmd1-S-14	FSM	0.0152311	0.0992699	0.17679
PB.165917.214	Arhgap10	Arhgap10-S-214	ISM	0.00612031	0.0361723	0.0302337
PB.9495.29	Ppp1r12a	Ppp1r12a-S-29	ISM	0	0.0152311	0.0212592
PB.44021.1	Dcp1a	Dcp1a-S-1	FSM	0.0212592	0.00612031	0.0122034
PB.27121.95	Arhgap5	Arhgap5-S-95	NNC	0.0152311	0.145438	0.104813
PB.131920.216	Haus3	Haus3-S-216	ISM	0.0212592	0.145438	0.155999
PB.62949.3440	Hsp90ab1	Hsp90ab1-S-3440	NNC	0.00306484	0.0272511	0.0212592
PB.100418.30	Zfp334	Zfp334-S-30	FSM	0	0.00306484	0.0152311
PB.2639.242	Cdk1	Cdk1-S-242	ISM	0.00612031	0.0908965	0.199676
PB.102740.134	Rabgap1	Rabgap1-S-134	ISM	0.0152311	0.126685	0.153369
PB.107993.322	Gid8	Gid8-S-322	ISM	0.00306484	0	0.0152311
PB.5216.575	Akap12	Akap12-S-575	NNC	0	0.0566839	0.0508662
PB.103794.440	Ppig	Ppig-S-440	ISM	0.0212592	0.0152311	0.00612031
PB.159646.314	Gm17768	Gm17768-S-314	NNC	0	0.0152311	0.0122034
PB.119026.178	Impad1	Impad1-S-178	ISM	0	0.0182497	0.00916647
PB.82753.1759	Trip12	Trip12-S-1759	NNC	0.00306484	0.0272511	0.0624679
PB.173392.1013	Anln	Anln-S-1013	ISM	0	0.0182497	0.0361723
PB.13614.305	Taok1	Taok1-S-305	NNC	0	0.0450145	0.0302337
PB.94993.323	Brd3	Brd3-S-323	ISM	0.0242596	0.115809	0.229397
PB.12078.1100	Canx	Canx-S-1100	ISM	0.0420758	0.514157	0.574698
PB.58676.7	Crkl	Crkl-S-7	ISM	0	0.0152311	0.0152311
PB.16829.760	Mtif2	Mtif2-S-760	ISM	0.0152311	0.0242596	0.0566839
PB.113139.65	Prkacb	Prkacb-S-65	FSM	0.0242596	0.192105	0.209681
PB.73162.209	Lmnb1	Lmnb1-S-209	ISM	0.0391284	0.510479	0.437898
PB.3064.465	Pfkl	Pfkl-S-465	ISM	0.00306484	0.00916647	0.0272511
PB.3857.189	Apaf1	Apaf1-S-189	ISM	0	0.0152311	0.0212592
PB.51906.12	Vps13b	Vps13b-S-12	ISM	0.00306484	0.0272511	0.0508662
PB.40883.128	Prmt5	Prmt5-S-128	ISM	0.00306484	0.0242596	0.0361723
PB.131858.573	Prr14l	Prr14l-S-573	NIC	0	0.00612031	0.0152311
PB.169018.57	Erlin2	Erlin2-S-57	ISM	0	0.0182497	0.0212592
PB.8622.594	Zfp873	Zfp873-S-594	FSM	0.00916647	0.0361723	0.0332074
PB.171808.1508	Prmt7	Prmt7-S-1508	FSM	0	0.00916647	0.0272511
PB.5216.595	Akap12	Akap12-S-595	NNC	0.0122034	0.110326	0.0796219
PB.158216.266	Cnot3	Cnot3-S-266	ISM	0.0152311	0.0479447	0.0908965
PB.88764.37	Bzw1	Bzw1-S-37	ISM	0.00306484	0.0242596	0.0242596
PB.153266.866	Ppp5c	Ppp5c-S-866	ISM	0.00306484	0.0537793	0.0302337
PB.119379.51	Decr1	Decr1-S-51	ISM	0	0.00916647	0.0182497
PB.59527.43	Iqcb1	Iqcb1-S-43	ISM	0.00306484	0.0122034	0.0182497
PB.108006.69	Arfgap1	Arfgap1-S-69	FSM	0	0	0.0212592
PB.151983.1314	Chd4	Chd4-S-1314	ISM	0.0739365	0.657556	0.81742
PB.62497.322	Brd2	Brd2-S-322	ISM	0	0.0302337	0.0152311
PB.73895.311	Pias2	Pias2-S-311	NNC	0	0.0152311	0.00916647
PB.72875.116	Commd10	Commd10-S-116	ISM	0.00916647	0.0242596	0.0479447
PB.139901.328	Zfp326	Zfp326-S-328	NNC	0.00306484	0.0182497	0
PB.162292.11	Tnrc6a	Tnrc6a-S-11	ISM	0	0.0182497	0.0361723
PB.41770.72	Gpalpp1	Gpalpp1-S-72	ISM	0.0212592	0.0796219	0.118539
PB.6019.13	Stx7	Stx7-S-13	ISM	0.00306484	0.0242596	0.0122034
PB.129763.207	Tcea3	Tcea3-S-207	ISM	0.00306484	0.0767832	0.0653474
PB.180607.3	Myo5a	Myo5a-S-3	ISM	0	0.0212592	0.0152311
PB.154948.259	Tjp1	Tjp1-S-259	ISM	0.00612031	0.0332074	0.0595801
PB.49771.267	Puf60	Puf60-S-267	ISM	0	0.0122034	0.0361723
PB.65874.431	H2-D1	H2-D1-S-431	ISM	0	0.0152311	0.0361723
PB.182261.6	Glb1	Glb1-S-6	ISM	0.00306484	0.0152311	0.0212592
PB.171937.237	Ap1g1	Ap1g1-S-237	ISM	0.00306484	0.0302337	0.0302337
PB.102740.223	Rabgap1	Rabgap1-S-223	ISM	0.0152311	0.104813	0.115809
PB.72343.421	Matr3	Matr3-S-421	ISM	0	0	0.0182497
PB.185497.99	Hmgn5	Hmgn5-S-99	FSM	0.166449	0.171633	0.17679
PB.114746.208	Jade1	Jade1-S-208	ISM	0	0.0242596	0.0182497
PB.16561.74	Cct4	Cct4-S-74	ISM	0.00306484	0.161237	0.187026
PB.103794.507	Ppig	Ppig-S-507	NIC	0	0.0710817	0.0152311
PB.123801.254	Zcchc17	Zcchc17-S-254	NIC	0.0479447	0.17679	0.189569
PB.136430.99	Rfc3	Rfc3-S-99	FSM	0	0.0152311	0.00916647
PB.34712.23	Trim27	Trim27-S-23	ISM	0.00612031	0.0908965	0.0908965
PB.166470.273	Brd7	Brd7-S-273	ISM	0	0.0272511	0.0479447
PB.159743.188	Nup62	Nup62-S-188	FSM	0	0.0182497	0.0152311
PB.171885.27	Zfhx3	Zfhx3-S-27	ISM	0	0.0908965	0.102045
PB.27994.822	Mthfd1	Mthfd1-S-822	ISM	0.00306484	0.0361723	0.0391284
PB.86271.192	Mia3	Mia3-S-192	FSM	0	0.0212592	0.0420758
PB.140612.2	Naa25	Naa25-S-2	ISM	0.0739365	0.140116	0.204691
PB.165647.207	Rpl18a	Rpl18a-S-207	FSM	0.169044	0.0479447	0.0242596
PB.40885.998	Acin1	Acin1-S-998	ISM	0	0.0420758	0.0152311
PB.146899.260	Lrp6	Lrp6-S-260	ISM	0.00612031	0.0302337	0.00916647
PB.137423.550	Dnajb6	Dnajb6-S-550	FSM	0.00916647	0.0361723	0.0566839
PB.64001.120	Fez2	Fez2-S-120	ISM	0	0.0302337	0.0450145
PB.123138.1919	Akr1a1	Akr1a1-S-1919	ISM	0.00306484	0.0242596	0.00612031
PB.123685.366	Zmym4	Zmym4-S-366	ISM	0	0.0796219	0.0566839
PB.183597.331	Thoc2	Thoc2-S-331	ISM	0.00306484	0.0122034	0.0152311
PB.187605.17	Atp6ap2	Atp6ap2-S-17	ISM	0.00306484	0.0391284	0.0152311
PB.145750.240	Tmf1	Tmf1-S-240	ISM	0.00612031	0.0450145	0.0537793
PB.35693.45	Pak1ip1	Pak1ip1-S-45	FSM	0.00612031	0.0508662	0.0537793
PB.118867.62	Zranb2	Zranb2-S-62	ISM	0.0767832	0.272385	0.346697
PB.45726.3	Sucla2	Sucla2-S-3	ISM	0.00306484	0.0710817	0.0682187
PB.56912.224	Bbx	Bbx-S-224	NNC	0.0122034	0.0152311	0.0272511
PB.74800.10	Tmem132a	Tmem132a-S-10	FSM	0.0242596	0.00612031	0.0242596
PB.84113.264	Srgap2	Srgap2-S-264	ISM	0.00306484	0.00612031	0.0182497
PB.93189.1	Exo1	Exo1-S-1	NIC	0.00612031	0.129386	0.184477
PB.54651.4	Eif4b	Eif4b-S-4	ISM	0.00306484	0.0880898	0.134765
PB.10297.30	Cnpy2	Cnpy2-S-30	ISM	0	0.00612031	0.0212592
PB.141007.3	Sfswap	Sfswap-S-3	ISM	0.0361723	0.158621	0.251122
PB.25176.1131	Hsp90aa1	Hsp90aa1-S-1131	ISM	0.0566839	0.129386	0.0653474
PB.58972.84	Eif4a2	Eif4a2-S-84	ISM	0.00306484	0.00306484	0.0242596
PB.151646.711	Hnrnpf	Hnrnpf-S-711	NNC	0	0.0182497	0.0182497
PB.49646.742	Ptk2	Ptk2-S-742	ISM	0.00306484	0.0272511	0.0182497
PB.146663.327	Ncapd2	Ncapd2-S-327	ISM	0.00306484	0.0710817	0.0479447
PB.14003.248	Ggnbp2	Ggnbp2-S-248	NIC	0.00916647	0.0152311	0.0152311
PB.59902.7	Cip2a	Cip2a-S-7	ISM	0.00916647	0.0182497	0.00612031
PB.114467.12	Fxr1	Fxr1-S-12	ISM	0	0.0391284	0.0796219
PB.28202.303	Srsf5	Srsf5-S-303	FSM	0	0.0361723	0.0182497
PB.81877.119	Wdr12	Wdr12-S-119	ISM	0.0152311	0.0420758	0.0361723
PB.65766.239	Daxx	Daxx-S-239	ISM	0.0182497	0	0.0182497
PB.178011.55	Taf1d	Taf1d-S-55	FSM	0.0122034	0.0479447	0.0420758
PB.14570.754	Top2a	Top2a-S-754	ISM	0.00306484	0.0880898	0.184477
PB.3564.450	Hsp90b1	Hsp90b1-S-450	ISM	0.00612031	0.0824525	0.0595801
PB.61974.825	Ccnf	Ccnf-S-825	ISM	0.00612031	0.0332074	0.0242596
PB.96962.394	Cwc22	Cwc22-S-394	ISM	0	0.00916647	0.0152311
PB.72132.42	Iws1	Iws1-S-42	ISM	0	0.00916647	0.0242596
PB.160586.23	Aen	Aen-S-23	ISM	0.00916647	0.00916647	0.0361723
PB.16829.10	Ccdc88a	Ccdc88a-S-10	ISM	0.00916647	0.104813	0.129386
PB.18123.49	Specc1	Specc1-S-49	ISM	0.00612031	0.0152311	0.0152311
PB.116637.8	Acp6	Acp6-S-8	FSM	0.0122034	0.0508662	0.0479447
PB.150194.202	Zfp638	Zfp638-S-202	ISM	0	0.00916647	0.0212592
PB.79045.157	Scd2	Scd2-S-157	ISM	0.00306484	0.0212592	0.0272511
PB.6019.10	Stx7	Stx7-S-10	ISM	0	0.0182497	0.0212592
PB.73162.206	Lmnb1	Lmnb1-S-206	ISM	0.155999	1.20934	1.1499
PB.62409.1183	Akap8	Akap8-S-1183	ISM	0.0302337	0.189569	0.181921
PB.150440.13	Ruvbl1	Ruvbl1-S-13	ISM	0.00612031	0.0796219	0.118539
PB.159078.3	Sirt2	Sirt2-S-3	ISM	0.00306484	0.0242596	0.0242596
PB.80800.280	Phf3	Phf3-S-280	NIC	0.00612031	0.0420758	0.0212592
PB.129261.14	Gnl2	Gnl2-S-14	ISM	0	0.0152311	0.00306484
PB.8638.145	Txnrd1	Txnrd1-S-145	ISM	0.0361723	0.145438	0.145438
PB.161189.34	Ints4	Ints4-S-34	ISM	0	0.0182497	0.00612031
PB.77932.16	Zfand5	Zfand5-S-16	ISM	0.0272511	0.145438	0.0796219
PB.166959.177	Nae1	Nae1-S-177	ISM	0.00916647	0.0420758	0.0361723
PB.77465.406	Wdr74	Wdr74-S-406	ISM	0.00916647	0.132079	0.132079
PB.83216.555	Hdlbp	Hdlbp-S-555	ISM	0.00306484	0.0242596	0.0420758
PB.143180.175	Tmem209	Tmem209-S-175	ISM	0	0.00306484	0.0182497
PB.67884.4	Foxn2	Foxn2-S-4	ISM	0.0182497	0.132079	0.246335
PB.117225.49	Psrc1	Psrc1-S-49	ISM	0	0.0302337	0.0122034
PB.153880.1799	Gpi1	Gpi1-S-1799	ISM	0	0.0391284	0.0420758
PB.63378.201	Safb2	Safb2-S-201	ISM	0.00306484	0.00612031	0.0302337
PB.14727.323	Ubtf	Ubtf-S-323	ISM	0.00612031	0.0908965	0.0992699
PB.23076.135	Sec23a	Sec23a-S-135	ISM	0.00612031	0.0212592	0.0361723
PB.59485.1	Sema5b	Sema5b-S-1	NNC	0.0182497	0.00612031	0.00612031
PB.41957.157	Naa16	Naa16-S-157	ISM	0.00306484	0.0332074	0.0361723
PB.8544.842	Gpx4	Gpx4-S-842	NNC	0.0566839	0.0391284	0.0361723
PB.127588.288	Snapc3	Snapc3-S-288	ISM	0.00306484	0.0361723	0.0852751
PB.148219.122	Arf5	Arf5-S-122	ISM	0.0212592	0.0212592	0.0122034
PB.133566.834	G3bp2	G3bp2-S-834	ISM	0.0152311	0.239111	0.311356
PB.169213.171	Gsr	Gsr-S-171	NNC	0	0.00916647	0.0152311
PB.80253.292	Ncoa2	Ncoa2-S-292	ISM	0	0.0302337	0.0242596
PB.58255.269	Dnaja3	Dnaja3-S-269	ISM	0	0.0152311	0.0212592
PB.48571.33	Slc25a32	Slc25a32-S-33	FSM	0.0122034	0.0508662	0.0302337
PB.9399.169	Gm21312	Gm21312-S-169	FSM	0	0.0272511	0.0152311
PB.131305.261	Dnajc2	Dnajc2-S-261	ISM	0.453622	0.94214	0.936139
PB.72132.26	Iws1	Iws1-S-26	ISM	0.00306484	0.0122034	0.0152311
PB.104353.2	Gm13696	Gm13696-S-2	FSM	0	0.0212592	0.00916647
PB.54667.679	Hnrnpa1	Hnrnpa1-S-679	ISM	0	0.0302337	0.0182497
PB.31589.89	Sptlc1	Sptlc1-S-89	ISM	0.00306484	0.00612031	0.0242596
PB.67342.757	Birc6	Birc6-S-757	ISM	0	0.0242596	0.0152311
PB.61974.270	Atp6v0c	Atp6v0c-S-270	FSM	0.00306484	0.0182497	0.00306484
PB.51858.501	Mtdh	Mtdh-S-501	ISM	0	0.0182497	0.00612031
PB.4991.450	Usp15	Usp15-S-450	ISM	0	0.00612031	0.0212592
PB.93081.72	Copa	Copa-S-72	ISM	0.00612031	0.0272511	0.0710817
PB.128086.191	Ift74	Ift74-S-191	ISM	0.0936954	0.209681	0.209681
PB.29265.12	Dync1h1	Dync1h1-S-12	ISM	0.00612031	0.174215	0.169044
PB.111523.241	Wdr3	Wdr3-S-241	ISM	0	0.00916647	0.0212592
PB.163354.179	Shcbp1	Shcbp1-S-179	ISM	0.00306484	0.0182497	0.0212592
PB.38636.50	Dhx29	Dhx29-S-50	ISM	0.0242596	0.219588	0.207189
PB.55276.135	2610318N02Rik	2610318N02Rik-S-135	ISM	0.00916647	0.0242596	0.0391284
PB.36760.87	Habp4	Habp4-S-87	ISM	0	0.00306484	0.0212592
PB.28779.246	Zc3h14	Zc3h14-S-246	ISM	0	0.0182497	0.0122034
PB.4659.1119	Cct2	Cct2-S-1119	ISM	0.00306484	0.0182497	0.0122034
PB.18533.4	Rabep1	Rabep1-S-4	ISM	0	0.0272511	0.0391284
PB.41054.280	Pspc1	Pspc1-S-280	ISM	0.00916647	0.104813	0.0824525
PB.177986.12	Mre11a	Mre11a-S-12	ISM	0.00306484	0.0537793	0.0566839
PB.100031.112	Tti1	Tti1-S-112	ISM	0	0.0212592	0.0122034
PB.54651.27	Eif4b	Eif4b-S-27	ISM	0.00306484	0	0.0212592
PB.149035.143	Cul1	Cul1-S-143	ISM	0.00916647	0.0272511	0.0152311
PB.54836.854	Usp7	Usp7-S-854	NIC	0	0.00612031	0.0272511
PB.182545.79	Ctnnb1	Ctnnb1-S-79	ISM	0	0.0796219	0.0242596
PB.182243.663	Ubp1	Ubp1-S-663	ISM	0	0	0.0212592
PB.16582.20	Xpo1	Xpo1-S-20	ISM	0.0242596	0.199676	0.306849
PB.81611.335	Pms1	Pms1-S-335	NIC	0	0.00306484	0.0212592
PB.57873.497	Gart	Gart-S-497	ISM	0	0.0595801	0.0624679
PB.19757.13	Psmd3	Psmd3-S-13	ISM	0	0.00612031	0.0242596
PB.166320.668	Junb	Junb-S-668	FSM	0	0.0182497	0.0242596
PB.128743.6	Faf1	Faf1-S-6	ISM	0	0.0242596	0.00306484
PB.62949.4680	Mymx	Mymx-S-4680	NNC	0.0479447	0.0152311	0
PB.90711.427	Tfcp2l1	Tfcp2l1-S-427	ISM	0.0824525	0.646361	0.696546
PB.13694.119	Tnfaip1	Tnfaip1-S-119	ISM	0	0.0122034	0.0242596
PB.159083.71	Hnrnpl	Hnrnpl-S-71	ISM	0	0.0152311	0.0272511
PB.17641.2	Kif3a	Kif3a-S-2	ISM	0.00306484	0.0242596	0.00916647
PB.33209.228	Fcho2	Fcho2-S-228	FSM	0.0242596	0.192105	0.121262
PB.147126.179	Recql	Recql-S-179	FSM	0	0.0122034	0.0332074
PB.73162.215	Lmnb1	Lmnb1-S-215	ISM	0	0.0302337	0.0361723
PB.97681.815	Caprin1	Caprin1-S-815	ISM	0.00612031	0.0302337	0.0420758
PB.2472.590	Kif1bp	Kif1bp-S-590	ISM	0	0.0152311	0.0272511
PB.154037.298	Uri1	Uri1-S-298	NIC	0	0.0122034	0.0212592
PB.86124.441	H3f3a	H3f3a-S-441	FSM	0.0212592	0.0212592	0.0566839
PB.82753.808	Trip12	Trip12-S-808	ISM	0.00612031	0.0391284	0.0212592
PB.10316.239	Pym1	Pym1-S-239	FSM	0.00612031	0.0272511	0.0332074
PB.3683.541	Utp20	Utp20-S-541	ISM	0	0.0122034	0.0152311
PB.54144.5	CN725425	CN725425-S-5	ISM	0.00306484	0.0152311	0.0152311
PB.177939.37	Fam76b	Fam76b-S-37	ISM	0.00916647	0.115809	0.126685
PB.95929.38	Rbm43	Rbm43-S-38	FSM	0	0.0361723	0.0302337
PB.59383.480	Snx4	Snx4-S-480	ISM	0.00612031	0.0624679	0.115809
PB.118119.8	Cenpe	Cenpe-S-8	ISM	0.00306484	0.0450145	0.0361723
PB.161768.1214	Swap70	Swap70-S-1214	FSM	0.0122034	0.161237	0.187026
PB.164123.1499	Ash2l	Ash2l-S-1499	ISM	0	0.00612031	0.0302337
PB.164433.175	Eri1	Eri1-S-175	ISM	0	0.0212592	0.00306484
PB.137423.500	Dnajb6	Dnajb6-S-500	ISM	0.00612031	0.0182497	0.0302337
PB.182144.16	Map4	Map4-S-16	ISM	0.00612031	0.0595801	0.126685
PB.139991.733	Mtf2	Mtf2-S-733	NNC	0.00916647	0.0212592	0.0302337
PB.82479.215	Tuba4a	Tuba4a-S-215	FSM	0.0302337	0.0479447	0.0508662
PB.5922.96	Sgk1	Sgk1-S-96	ISM	0.00306484	0.107574	0.107574
PB.31335.498	Dek	Dek-S-498	ISM	0.0182497	0.134765	0.0936954
PB.105532.867	Pdia3	Pdia3-S-867	ISM	0.0450145	0.987746	0.833554
PB.123765.1695	Zbtb8a	Zbtb8a-S-1695	FSM	0	0.00916647	0.0272511
PB.50599.43	Pus7l	Pus7l-S-43	ISM	0	0.0122034	0.0212592
PB.62949.3340	Hsp90ab1	Hsp90ab1-S-3340	NNC	0	0.0242596	0.0302337
PB.151519.225	Fancd2	Fancd2-S-225	ISM	0	0.00916647	0.0182497
PB.176020.94	Me1	Me1-S-94	ISM	0.00612031	0.0391284	0.0537793
PB.112999.366	Hs2st1	Hs2st1-S-366	FSM	0.00306484	0.0242596	0.0122034
PB.85526.283	Pou2f1	Pou2f1-S-283	ISM	0	0.00306484	0.0182497
PB.105374.1	Eif2ak4	Eif2ak4-S-1	ISM	0.0595801	0.224504	0.209681
PB.10465.246	Nf2	Nf2-S-246	ISM	0	0.0420758	0.0624679
PB.170243.57	Nek1	Nek1-S-57	ISM	0.0361723	0.145438	0.187026
PB.140604.82	Rpl6	Rpl6-S-82	ISM	0.455571	0.842847	0.880451
PB.36394.276	Faf2	Faf2-S-276	ISM	0.0302337	0.288616	0.340165
PB.27542.107	Togaram1	Togaram1-S-107	ISM	0	0.00916647	0.0152311
PB.82831.2704	Ncl	Ncl-S-2704	NIC	0.0182497	0.0936954	0.110326
PB.91829.716	Tpr	Tpr-S-716	ISM	0	0.00916647	0.0182497
PB.120215.227	Vcp	Vcp-S-227	ISM	0	0.0212592	0.0242596
PB.155558.148	Sec11a	Sec11a-S-148	FSM	0.00306484	0.123977	0.134765
PB.151584.180	Washc2	Washc2-S-180	ISM	0.0182497	0.239111	0.248731
PB.174920.370	Kif23	Kif23-S-370	ISM	0.00612031	0.0450145	0.0450145
PB.182681.112	Sacm1l	Sacm1l-S-112	ISM	0	0.0212592	0.0122034
PB.141984.9	Gtf3a	Gtf3a-S-9	ISM	0.00916647	0.0242596	0.0450145
PB.25917.108	Smc6	Smc6-S-108	NIC	0	0.00916647	0.0212592
PB.65042.185	Afdn	Afdn-S-185	ISM	0	0.0420758	0.0361723
PB.91829.25	Tpr	Tpr-S-25	ISM	0	0.0152311	0.0122034
PB.99962.81	Dsn1	Dsn1-S-81	ISM	0.00612031	0.129386	0.121262
PB.49843.611	Myh9	Myh9-S-611	ISM	0.00916647	0.140116	0.148089
PB.123446.1562	Macf1	Macf1-S-1562	ISM	0.00612031	0.0122034	0.0212592
PB.3862.483	Slc25a3	Slc25a3-S-483	ISM	0.0122034	0.0537793	0.0537793
PB.110867.427	Rps3a1	Rps3a1-S-427	FSM	0.0242596	0.107574	0.118539
PB.175040.681	Map2k1	Map2k1-S-681	ISM	0	0.0152311	0.0122034
PB.174920.413	Kif23	Kif23-S-413	ISM	0.00612031	0.00612031	0.0272511
PB.115408.61	Mme	Mme-S-61	NIC	0	0.0212592	0.0122034
PB.93689.414	Eprs	Eprs-S-414	ISM	0.0332074	0.315842	0.359634
PB.99843.743	Eif2s2	Eif2s2-S-743	ISM	0.439877	0.82552	0.591828
PB.10461.466	Mtmr3	Mtmr3-S-466	ISM	0.00612031	0.0566839	0.0272511
PB.64287.301	Lrpprc	Lrpprc-S-301	ISM	0	0.0182497	0.0272511
PB.115560.4	Mfsd1	Mfsd1-S-4	ISM	0.00612031	0.0653474	0.0537793
PB.126204.62	Dnaja1	Dnaja1-S-62	ISM	0.00916647	0.0182497	0.00306484
PB.166309.362	Ier2	Ier2-S-362	FSM	0.00916647	0.0302337	0.0595801
PB.160626.83	Prc1	Prc1-S-83	FSM	0.0391284	0.107574	0.194635
PB.143888.270	Igf2bp3	Igf2bp3-S-270	ISM	0.00306484	0.0992699	0.102045
PB.170243.66	Nek1	Nek1-S-66	FSM	0.00612031	0.0182497	0.0182497
PB.36544.92	Rmi1	Rmi1-S-92	FSM	0	0.0182497	0.0152311
PB.171207.1619	Hook2	Hook2-S-1619	ISM	0	0.0212592	0.0302337
PB.106411.17	Polr3f	Polr3f-S-17	ISM	0	0.0212592	0.0302337
PB.80800.496	Phf3	Phf3-S-496	ISM	0	0.0739365	0.0182497
PB.54836.827	Usp7	Usp7-S-827	ISM	0	0.0420758	0.0242596
PB.179844.11	Uaca	Uaca-S-11	ISM	0.00612031	0.0361723	0.0537793
PB.135941.938	Actb	Actb-S-938	ISM	0	0.0212592	0.00612031
PB.19114.32	Acaca	Acaca-S-32	FSM	0.00306484	0.0479447	0.0537793
PB.135645.219	Srrt	Srrt-S-219	ISM	0.150732	0.407732	0.521473
PB.41173.125	Gm49336	Gm49336-S-125	ISM	0	0.00612031	0.0182497
PB.28966.158	Cpsf2	Cpsf2-S-158	ISM	0	0.00306484	0.0152311
PB.59373.46	Fyttd1	Fyttd1-S-46	ISM	0	0.0152311	0.0212592
PB.67232.26	Zbtb14	Zbtb14-S-26	FSM	0	0.0182497	0.0122034
PB.160625.34	Ngrn	Ngrn-S-34	FSM	0.0152311	0.0595801	0.0566839
PB.71211.7	Jcad	Jcad-S-7	ISM	0	0.0152311	0.0122034
PB.18826.603	Myo18a	Myo18a-S-603	FSM	0	0.00916647	0.0212592
PB.164123.2441	Hook3	Hook3-S-2441	ISM	0.0122034	0.158621	0.194635
PB.157103.160	Thumpd1	Thumpd1-S-160	FSM	0	0.0122034	0.0212592
PB.61745.419	Pdcd2	Pdcd2-S-419	ISM	0	0.0420758	0.0182497
PB.67853.47	Msh6	Msh6-S-47	ISM	0.0242596	0.260628	0.253507
PB.116291.736	Smg5	Smg5-S-736	ISM	0.00916647	0.0566839	0.0508662
PB.30806.137	Eci2	Eci2-S-137	ISM	0	0.0242596	0.0332074
PB.83225.209	Dtymk	Dtymk-S-209	ISM	0	0.0152311	0.0272511
PB.430.139	Ltv1	Ltv1-S-139	ISM	0	0.0212592	0.0361723
PB.141284.2	Baz1b	Baz1b-S-2	ISM	0.00306484	0.0242596	0.0182497
PB.120541.184	Tex10	Tex10-S-184	ISM	0.0152311	0.0391284	0.0508662
PB.12510.254	Gemin5	Gemin5-S-254	ISM	0.0152311	0.113071	0.142781
PB.162021.2	AV356131	AV356131-S-2	FSM	0.0992699	0.0450145	0.0880898
PB.83533.420	Vps4b	Vps4b-S-420	ISM	0	0.00916647	0.0212592
PB.138627.177	Slc30a9	Slc30a9-S-177	FSM	0.0739365	0.0710817	0.0566839
PB.56912.298	Bbx	Bbx-S-298	ISM	0.0122034	0.110326	0.126685
PB.78371.42	Uhrf2	Uhrf2-S-42	ISM	0	0.0212592	0.0242596
PB.138491.8	Klf3	Klf3-S-8	NNC	0.0152311	0.0964865	0.137444
PB.79888.293	Mrpl15	Mrpl15-S-293	FSM	0.0420758	0.126685	0.129386
PB.14591.187	Smarce1	Smarce1-S-187	ISM	0.00612031	0.0479447	0.0450145
PB.44037.5	Sfmbt1	Sfmbt1-S-5	ISM	0	0.0182497	0.0272511
PB.27542.275	Prpf39	Prpf39-S-275	ISM	0.00306484	0.0272511	0.0272511
PB.95602.113	Nr6a1	Nr6a1-S-113	ISM	0.00306484	0.0710817	0.0936954
PB.31335.558	Dek	Dek-S-558	FSM	0.0479447	0.222049	0.342347
PB.168740.217	Mrps31	Mrps31-S-217	ISM	0.00612031	0.00612031	0.0182497
PB.172161.21	Cenpn	Cenpn-S-21	ISM	0	0.0182497	0.0302337
PB.60820.37	Usp16	Usp16-S-37	ISM	0.00612031	0.0420758	0.0479447
PB.63973.71	Fam98a	Fam98a-S-71	ISM	0	0.0242596	0.0182497
PB.15538.353	Eif4a3	Eif4a3-S-353	ISM	0	0.0479447	0.0595801
PB.76164.107	Hps1	Hps1-S-107	ISM	0.00306484	0.0122034	0.0212592
PB.81683.259	Sf3b1	Sf3b1-S-259	ISM	0	0.0152311	0.00916647
PB.45723.4	Med4	Med4-S-4	ISM	0	0.00612031	0.0272511
PB.84113.52	Srgap2	Srgap2-S-52	ISM	0.00612031	0.0242596	0.00916647
PB.169213.181	Gsr	Gsr-S-181	ISM	0.0122034	0.123977	0.145438
PB.135603.186	Cux1	Cux1-S-186	ISM	0	0.0361723	0.0122034
PB.134241.261	Evi5	Evi5-S-261	ISM	0	0.0272511	0.0212592
PB.67681.90	Mta3	Mta3-S-90	ISM	0.00306484	0.0272511	0.0212592
PB.28327.501	Rbm25	Rbm25-S-501	ISM	0.153369	0.0212592	0.0212592
PB.62949.3247	Hsp90ab1	Hsp90ab1-S-3247	ISM	0.357489	1.23198	1.28091
PB.100319.228	Serinc3	Serinc3-S-228	ISM	0	0.0152311	0.0182497
PB.63801.806	Ndc80	Ndc80-S-806	ISM	0.0682187	0.251122	0.255886
PB.178263.1738	Dnm2	Dnm2-S-1738	ISM	0.00612031	0.0122034	0.0302337
PB.36544.107	Rmi1	Rmi1-S-107	FSM	0	0.00612031	0.0152311
PB.191731.654	Ctps2	Ctps2-S-654	ISM	0	0.0152311	0.0122034
PB.24509.172	Irf2bpl	Irf2bpl-S-172	FSM	0	0.0122034	0.0152311
PB.14744.1465	Eftud2	Eftud2-S-1465	ISM	0	0.0212592	0.0391284
PB.52097.5	Dcaf13	Dcaf13-S-5	ISM	0	0.0302337	0.0152311
PB.15374.80	Mxra7	Mxra7-S-80	ISM	0	0.0122034	0.0302337
PB.174310.371	Rbm7	Rbm7-S-371	FSM	0.00306484	0.0122034	0.0182497
PB.122867.518	Btf3l4	Btf3l4-S-518	ISM	0	0.0122034	0.0302337
PB.5216.1655	Armt1	Armt1-S-1655	FSM	0.00306484	0.0152311	0.00306484
PB.81535.567	Myo1b	Myo1b-S-567	ISM	0.0302337	0.25826	0.297774
PB.182508.121	Rpsa	Rpsa-S-121	ISM	0.00916647	0.0796219	0.0450145
PB.41632.143	Fndc3a	Fndc3a-S-143	ISM	0.00306484	0.0508662	0.0272511
PB.113791.279	E2f5	E2f5-S-279	ISM	0.00306484	0.0122034	0.0152311
PB.14727.335	Ubtf	Ubtf-S-335	NNC	0.00306484	0.0152311	0.00612031
PB.82619.220	Cul3	Cul3-S-220	ISM	0	0.00916647	0.0272511
PB.125688.790	Pnisr	Pnisr-S-790	ISM	0.00306484	0.0391284	0.0537793
PB.8661.42	Washc4	Washc4-S-42	ISM	0	0.0152311	0.0122034
PB.57273.78	Zfp654	Zfp654-S-78	ISM	0.0152311	0.0152311	0.00916647
PB.163912.354	Ckap2	Ckap2-S-354	FSM	0.00306484	0.00916647	0.0152311
PB.113385.778	Srsf11	Srsf11-S-778	ISM	0.0361723	0.0182497	0.0302337
PB.168951.467	Nsd3	Nsd3-S-467	ISM	0.00612031	0.0964865	0.123977
PB.18696.2043	Ywhae	Ywhae-S-2043	FSM	0	0.0152311	0.0332074
PB.157365.81	Nsmce1	Nsmce1-S-81	ISM	0	0	0.0182497
PB.99969.122	Samhd1	Samhd1-S-122	ISM	0.00612031	0.0420758	0.0537793
PB.103807.65	Ssb	Ssb-S-65	ISM	0.0479447	0.155999	0.174215
PB.72343.70	Snhg4	Snhg4-S-70	FSM	0.00306484	0.0624679	0.0391284
PB.182073.2604	Usp19	Usp19-S-2604	ISM	0	0.0152311	0.0122034
PB.55002.656	Rsl1d1	Rsl1d1-S-656	FSM	0.00612031	0.0936954	0.0936954
PB.101024.344	Dido1	Dido1-S-344	ISM	0	0.0122034	0.0242596
PB.58819.632	Psmd2	Psmd2-S-632	ISM	0.00306484	0.0182497	0
PB.6042.20	Ccn2	Ccn2-S-20	NIC	0	0.0212592	0.0182497
PB.154273.587	Ap2a1	Ap2a1-S-587	FSM	0.00306484	0.0212592	0.0152311
PB.176991.969	Cnot10	Cnot10-S-969	ISM	0.0361723	0.226954	0.214647
PB.174102.164	Rnf214	Rnf214-S-164	NIC	0.00306484	0.0272511	0.00306484
PB.82831.1647	Ncl	Ncl-S-1647	ISM	0.61864	0.707196	0.685781
PB.40820.1265	Supt16	Supt16-S-1265	ISM	0	0.00306484	0.0182497
PB.79361.105	Add3	Add3-S-105	FSM	0	0.0682187	0.0212592
PB.72343.980	Matr3	Matr3-S-980	ISM	0.00306484	0.21712	0.239111
PB.72343.126	Snhg4	Snhg4-S-126	FSM	0	0.0332074	0.0450145
PB.146466.503	Erc1	Erc1-S-503	NIC	0.00612031	0.0391284	0.0272511
PB.180964.8	Ttk	Ttk-S-8	ISM	0.00306484	0.0242596	0.00916647
PB.109715.43	Nhlrc3	Nhlrc3-S-43	FSM	0.0739365	0.0361723	0.0361723
PB.140791.1	Ddx55	Ddx55-S-1	ISM	0.0595801	0.132079	0.150732
PB.91653.13	Zbtb41	Zbtb41-S-13	ISM	0	0.0242596	0.00916647
PB.128125.565	Hook1	Hook1-S-565	ISM	0	0.0361723	0.0479447
PB.53891.2	Fam118a	Fam118a-S-2	NIC	0	0.0182497	0.0152311
PB.131466.196	Rheb	Rheb-S-196	ISM	0.00306484	0.0212592	0.0332074
PB.11703.268	Rars	Rars-S-268	ISM	0	0.0302337	0.0272511
PB.56912.134	Bbx	Bbx-S-134	ISM	0.00916647	0.246335	0.236691
PB.179777.3178	Myo9a	Myo9a-S-3178	NIC	0	0.0182497	0.0182497
PB.174097.94	Cep164	Cep164-S-94	NIC	0.00306484	0.0152311	0.00916647
PB.150262.183	Cct7	Cct7-S-183	ISM	0.0152311	0.0964865	0.118539
PB.102284.290	Setx	Setx-S-290	ISM	0.00916647	0.0479447	0.0595801
PB.133198.448	Ppat	Ppat-S-448	ISM	0.0537793	0.530543	0.631781
PB.102284.306	Setx	Setx-S-306	ISM	0	0.0332074	0.0420758
PB.16829.640	Ccdc88a	Ccdc88a-S-640	ISM	0	0.0212592	0.0242596
[truncated: 18,304 more rows]
