# Supplementary material for: Single-cell full-length isoform sequencing reveals an abundance of 3’ prime partial transcripts in maternally inherited RNAs
Source: Research Square preprint supplement (doi:10.21203/rs.3.rs-1752209/v1), 2022-06-15
Supplement: Supplementary file 7 [file 37e561b3e2efcb2ba478f33a.xlsx]

## Sheet: Totipotent genes
Gene name
1700013G24Rik
1700013H16Rik
1700029F12Rik
1700093K21Rik
2610020C07Rik
2610206C17Rik
4921531C22Rik
4933401D09Rik
4933404O12Rik
6720489N17Rik
9430038I01Rik
A630072M18Rik
AF067061
AF067063
AW011738
Acap3
Adm
Ankrd22
Antxr1
Ap4e1
Apom
Arid5a
Arl2bp
Arl4a
Arl4d
Arsk
Aste1
Atp4b
B020031M17Rik
B930095G15Rik
BB287469
BC005537
BC080695
BC147527
Bag5
Bambi
Calhm6
Cbln1
Ccnjl
Ccser1
Cd24a
Cd74
Cdkn2c
Cdkn2d
Cldn9
Colq
Cpd
Cptp
Csrnp3
Cxcl16
D030056L22Rik
Dcc
Ddit4l
Dubr
Duoxa2
E2f7
Echdc3
Efnb2
Enox2
Ephb1
Ercc4
Ero1l
Esyt1
Fabp9
Fam83d
Fbxl12
Fbxo16
Fgf1
Fgf7
Ficd
Frg2f1
Fundc1
Fzd4
Fzd7
G2e3
Gadd45a
Gid4
Gm10696
Gm11238
Gm11413
Gm11487
Gm11756
Gm12789
Gm12794
Gm13078
Gm13083
Gm13128
Gm16222
Gm16973
Gm2016
Gm2022
Gm20767
Gm21319
Gm21761
Gm2694
Gm38407
Gm4858
Gm5039
Gm5127
Gm5662
Gm6803
Gm7102
Gm8016
Gm8300
Gm8994
Gm9125
Gpatch3
Gpr50
Gt(ROSA)26Sor
Gusb
Hesx1
Hexim1
Hmgn3
Hs6st2
Hspa1a
Hspa1b
Hspa2
Ier5
Ints6
Kctd12
Klb
Klhl11
Klrg2
Lbp
Limch1
Lin9
Lipo3
Lmx1a
Lpar6
Lrp12
Lysmd1
Mapkapk2
Mbd5
Micall1
Mid1ip1
Nell1
Nfat5
Nicn1
Nmb
Nrarp
Oat
Obox3
Olfr376
Olfr815
P3h1
Pabpn1
Parp10
Pcdh10
Pde12
Perm1
Pif1
Pin1rt1
Pld6
Plekho2
Plk2
Plk3
Pnp
Ppp1r15a
Ppp1r8
Pramef17
Pramef25
Pramef6
Prex2
Prokr2
Rad9b
Rbm15
Rbmx2
Rfpl4b
Rimklb
Rnf225
Rpp25
Rsbn1l
Sac3d1
Sertad1
Sesn2
Sfi1
Ska2
Slc16a1
Slc22a28
Slc30a1
Slc31a1
Slc35e3
Snai1
Snapc2
Sowaha
Spdye4b
Srf
Stk17b
Stk26
Stk40
Sugct
Sva
Syna
Synm
Tacr3
Tbcc
Tbxa2r
Tcaf2
Tchh
Tcstv1
Tcstv3
Tdpoz1
Tex11
Tgfbr1
Thap11
Tktl1
Tmed5
Tmem132c
Tmem184c
Tmem92
Tnfaip6
Tnfrsf12a
Tob1
Tob2
Topors
Trabd2b
Trim69
Tsc22d3
Ttc30b
Ubap1
Ugt2b36
Usp17la
Usp17lb
Usp17lc
Usp17ld
Usp17le
Usp26
Usp32
Usp50
Utp14b
Wdr44
Yy2
Zfp105
Zfp217
Zfp352
Zfp54
Zfp560
Zfp599
Zfp703
Zfp707
Zfp760
Zfp791
Zfp809
Zfp867
Zfp954
Zfy2
Zic3
Zrsr1
Zscan4b
Zscan4c
Zscan4d

## Sheet: Minor ZGA genes
Gene name
1010001B22Rik
1700010D01Rik
1700025F22Rik
1700025F24Rik
1810044D09Rik
2210016F16Rik
2310040G24Rik
2410141K09Rik
2610206C17Rik
4930417O22Rik
4930515G01Rik
4930533D04Rik
4930579G24Rik
4933425B07Rik
9430041J12Rik
A930014E10Rik
AC125149.5
AC133095.2
AC140365.1
AF067061
AF067063
AI427809
AW822073
Abi2
Acy3
Akap8
Akr1b10
Alkbh4
Ammecr1
Ankmy2
Aprt
Arhgap8
Arrdc3
Arrdc5
Asnsd1
Ass1
Atf3
Atp5j
B020004C17Rik
B020004J07Rik
B020031M17Rik
BB287469
BC051665
BC080695
Bambi
Bcl2l12
Bex6
Bfsp1
Bloc1s2
Cacnb3
Cbr1
Cbwd1
Ccdc107
Ccnb1ip1
Cct6a
Cd24a
Cdk4
Cdkn1a
Chchd10
Chek2
Chit1
Clp1
Cmtm2a
Coa4
Coa6
Cox8c
Crabp1
Cstb
Ctsl
Cxcl14
Cypt2
Cypt3
D13Ertd608e
Dapl1
Dcdc2c
Ddit4l
Defb13
Defb23
Dlx3
Dppa4
Duoxa2
Duxf3
Dync1li2
Dyrk3
Ebp
Eef1g
Ei24
Eif5a2
F730035P03Rik
Fam162b
Fam174b
Fcgr3
Gabpa
Gadd45g
Galk2
Galt
Gatd1
Gcsh
Gm10424
Gm10696
Gm10800
Gm10801
Gm11238
Gm11756
Gm12279
Gm12594
Gm12688
Gm12718
Gm12789
Gm12800
Gm13068
Gm13078
Gm13101
Gm13119
Gm13335
Gm14102
Gm14322
Gm14742
Gm14929
Gm15392
Gm15414
Gm15561
Gm16243
Gm16283
Gm16368
Gm16577
Gm2016
Gm2022
Gm2035
Gm2056
Gm20625
Gm20713
Gm2075
Gm20767
Gm21319
Gm21731
Gm21761
Gm21936
Gm26910
Gm26917
Gm28826
Gm29283
Gm30262
Gm32687
Gm32950
Gm33055
Gm33466
Gm34152
Gm36079
Gm38389
Gm4027
Gm40910
Gm40977
Gm41409
Gm4302
Gm43042
Gm43049
Gm43129
Gm4340
Gm43678
Gm44096
Gm44172
Gm44693
Gm44736
Gm45593
Gm47001
Gm47009
Gm47224
Gm47381
Gm47510
Gm47593
Gm47595
Gm4778
Gm47896
Gm47897
Gm47957
Gm47985
Gm47995
Gm48399
Gm48436
Gm48578
Gm48721
Gm48825
Gm48984
Gm49291
Gm50395
Gm5150
Gm5286
Gm5580
Gm5662
Gm5698
Gm5788
Gm6020
Gm6502
Gm6507
Gm6803
Gm6902
Gm7102
Gm7942
Gm8016
Gm8300
Gm8332
Gm8947
Gm8953
Gm8994
Gm9
Gm9895
Gm9999
Gstt4
Gt(ROSA)26Sor
H2-Aa
H2-Oa
Haus1
Hhipl2
Hist1h4i
Hist4h4
Hmox1
Id1
Ier3
Igkv1-117
Impdh2
Insl6
Klk14
Klrb1
Lage3
Ldha
Lect2
Lgals1
Lrmda
Lrrc51
Ltbp2
Mak16
Mapk7
Marcksl1
Mas1
Mcts2
Med29
Mgst1
Mrps18c
Msx1
Mt1
Mtln
Muc3
Myc
Ndufa7
Neil2
Nek3
Nmu
Nop2
Nudt9
Obox3
Obox4-ps35
Obox6
Olfr624
Pgp
Phf11a
Plaat3
Plpp7
Polr2m
Ppat
Ppp1r14d
Pramef25
Pramef6
Pramel6
Prdx4
Prnp
Prr11
Psat1
Rab20
Rab25
Rab5if
Rad9a
Rasl11a
Rbmx
Rfpl4b
Rgcc
Rnd1
Rpl18
Rpl23a
Rpp25
Rps27
Rtl10
Selenos
Serpinb3b
Shf
Sirt2
Slc16a6
Slc25a54
Slc35e3
Smim9
Snapc2
Sord
Sp5
Spz1
Ston1
Syce1
Tchh
Tdpoz1
Tex35
Timm8a1
Tmem132c
Tmem176b
Tmem249
Tmem53
Tmem92
Tmsb4x
Tnfrsf8
Tnfsf13os
Tnni3
Tob1
Tomm40
Tomm5
Trap1a
Trappc2l
Trim43a
Trim43b
Trip10
Ubtfl1
Usp17la
Usp17lc
Usp17ld
Xbp1
Zfas1
Zfp352
Zfp433
Zfp54
Zfp566
Zfp637
Zfp707
Zim2
Zscan4-ps2
Zscan4-ps3
Zscan4b
Zscan4c
Zscan4e
Zscan4f

## Sheet: Major ZGA genes
Gene name
1600002K03Rik
1600010M07Rik
1600025M17Rik
1700001O22Rik
1700034H15Rik
1700061G19Rik
1700063H04Rik
1700081N11Rik
1700084M14Rik
1700105P06Rik
1700125H20Rik
1810013D15Rik
1810030O07Rik
2210016L21Rik
2210020O09Rik
2310026L22Rik
2410003L11Rik
2510002D24Rik
2610028H24Rik
2810405F17Rik
4732440D04Rik
4833427F10Rik
4930458D05Rik
4930517L18Rik
4930527E20Rik
4930563E22Rik
4931413I07Rik
4933404O12Rik
4933408B17Rik
4933409D19Rik
6030468B19Rik
6230400D17Rik
9130209A04Rik
9230116L04Rik
9330159M07Rik
9530046B11Rik
9530077C05Rik
9930111H07Rik
A130014A01Rik
A230083N12Rik
A530041M06Rik
A630001G21Rik
AC125149.4
AI661453
AK157302
AW011738
AY074887
Abca17
Abhd14b
Abo
Acads
Actr5
Adck5
Agmat
Aicda
Aif1l
Akr1b7
Alg5
Amd2
Amhr2
Amigo3
Ampd1
Ankle1
Ankrd35
Ankrd39
Ankrd9
Ano9
Aoc3
Ap5b1
Apc2
Apoa5
Apobec1
Apoc1
Apol7b
Apon
Arg1
Arhgdig
Arhgef19
Armc6
Asb16
Asb6
Asl
Atcay
Atg4d
Atp1b2
Atxn7l3
B3galt1
B3galt4
B3galt6
B3gat3
B4galnt1
B4galt7
B930095G15Rik
BC028528
Bag2
Bcdin3d
Bcl2l14
Bex1
Bex2
Bhlhb9
Bhmt2
Bnipl
Bok
Borcs6
Bri3bp
C030006K11Rik
C130013H08Rik
C130074G19Rik
C1ql1
C730034F03Rik
Caap1
Cacna1b
Camkk2
Capn15
Capsl
Casc4
Ccdc125
Ccdc153
Ccdc32
Ccdc40
Ccdc9
Ccdc96
Cchcr1
Ccnjl
Cct8l1
Cd14
Cd74
Cd79a
Cdc42ep5
Cdk19
Cdsn
Ceacam1
Cercam
Cfap126
Cfap157
Chrna10
Chrne
Chst1
Clcnka
Cldn3
Clps
Cmtm7
Cndp2
Cngb1
Cnnm3
Cog2
Colgalt1
Commd4
Commd5
Comt
Coro1a
Cox7a1
Cpt1a
Creb3l3
Creld1
Crem
Crip1
Cryzl2
Csf3r
Cst6
Cst7
Ctrb1
Ctss
Cuedc2
Cxcl16
Cybc1
Cyp2s1
D14Ertd670e
D17H6S53E
D430041D05Rik
D5Ertd605e
Decr1
Dedd2
Defb30
Defb42
Dhcr24
Dio1
Dlk2
Dmgdh
Dnajb14
Dnajc12
Dnase1l1
Dnph1
Dohh
Dolpp1
Dpm1
Dram1
Dusp26
Dysf
E130215H24Rik
E130317F20Rik
E2f7
Ecm2
Eef1aknmt
Ehmt2
Eif2s3y
Elovl6
Eml3
Eng
Entpd3
Entpd7
Epas1
Etd
Exoc7
Fabp4
Fam131c
Fam219b
Fam43b
Fam57b
Fancd2os
Fblim1
Fbxo2
Fbxo6
Fcgrt
Fgf17
Fgf4
Fgfr4
Fgfrl1
Fkbp11
Flt3l
Flvcr1
Flvcr2
Flywch2
Foxa3
Frat1
Frmpd1os
Frrs1
Fthl17d
Fthl17e
Fthl17f
Fzd5
Fzd9
G6pc
Gal3st1
Gbgt1
Gdf3
Ggt6
Gip
Gldc
Glis2
Glod5
Glrx2
Gm10522
Gm10658
Gm10876
Gm11457
Gm11508
Gm11635
Gm11714
Gm11715
Gm11723
Gm11789
Gm11973
Gm12249
Gm12280
Gm12510
Gm12526
Gm12596
Gm12666
Gm128
Gm12979
Gm13025
Gm13055
Gm13261
Gm13723
Gm14252
Gm14743
Gm14798
Gm15017
Gm15056
Gm15241
Gm15290
Gm15614
Gm15911
Gm15917
Gm16124
Gm16145
Gm16310
Gm16344
Gm16540
Gm16853
Gm17108
Gm17151
Gm17231
Gm17332
Gm17491
Gm19710
Gm19792
Gm20161
Gm20404
Gm20508
Gm21781
Gm21887
Gm21915
Gm21917
Gm26549
Gm26634
Gm27234
Gm28729
Gm28867
Gm28942
Gm31036
Gm31063
Gm31108
Gm31597
Gm32507
Gm32511
Gm3286
Gm32913
Gm33508
Gm34250
Gm35279
Gm35371
Gm35986
Gm36172
Gm36635
Gm36839
Gm38293
Gm38655
Gm38973
Gm39168
Gm39556
Gm40685
Gm42775
Gm4316
Gm43301
Gm43332
Gm43480
Gm43661
Gm43936
Gm44702
Gm44734
Gm44920
Gm44983
Gm45052
Gm45121
Gm45441
Gm45469
Gm45556
Gm45864
Gm45895
Gm46603
Gm47043
Gm47093
Gm47257
Gm47283
Gm47414
Gm47430
Gm47648
Gm47731
Gm47738
Gm47946
Gm48155
Gm4847
Gm48799
Gm48807
Gm49126
Gm49156
Gm49427
Gm49454
Gm49981
Gm50013
Gm50022
Gm50087
Gm50107
Gm50202
Gm50250
Gm5127
Gm5538
Gm5577
Gm5773
Gm6890
Gm7792
Gm9117
Gm9758
Gm9908
Gmeb2
Gmppb
Gmpr2
Golga1
Gorasp1
Gpha2
Gpr161
Grap
Gstp3
Gtf2i
Gtf2ird2
Gtpbp3
Guca1b
Gusb
H2-Q10
H2-Q6
H2-Q7
H2-T22
H60c
Hand1
Hars2
Hcrt
Hipk1
Hnf1aos1
Hs3st6
Hsbp1l1
Hsd17b14
Hsd17b6
I0C0044D17Rik
Idh2
Ifi27
Igf2bp1
Igfbp2
Igkv4-78
Ikbkg
Il6ra
Inpp1
Ints6l
Ints7
Ip6k1
Iqub
Irak2
Irak3
Irf7
Irgq
Ism2
Itgav
Itgb7
Itln1
Itpkc
Jade3
Jmjd4
Jmy
Kank3
Kank4
Kat2b
Kbtbd2
Kcnk6
Kcnu1
Kctd8
Kif3c
Kifc2
Klf8
Klf9
Klhl10
Klhl23
Klk1b27
Klrg2
Kmt5c
Kri1
Krtap4-13
L1cam
L1td1
Lat2
Lck
Ldc1
Lemd3
Lpar6
Lrrc15
Lrrc25
Lrrn4cl
Lrsam1
Lst1
Lta
Ltbp4
Ly6g5c
Lysmd1
Lztr1
Man1b1
Man2a2
Map3k3
Map6
Map7d2
Mapkapk2
2022-03-09
Masp2
Mcrip1
Mdn1
Med9os
Mef2a
Mei1
Mettl21a
Mettl27
Mfsd12
Mfsd4b1
Mgat4e
Mief2
Miga2
Mir142hg
Mllt1
Mmp19
Mocs3
Mpdu1
Mpl
Mppe1
Mpv17
Mrm2
Mrm3
Mroh8
Mrps34
Mt2
Mtmr1
Mttp
Muc13
Myadml2
Nanos3
Ndufaf1
Neurl2
Nfe2
Nkapl
Nlrp12
Nme2
Nnat
Nodal
Noxred1
Npas1
Npc1l1
Npr1
Npw
Nr2c2
Nrip3
Nrm
Nrros
Nt5c3b
Nup210l
Nupr1
Nupr1l
Oaf
Orai2
Ormdl3
Osgin2
Osm
Oxld1
Parp10
Pck2
Pde6g
Peli3
Pfas
Pgam2
Pheta1
Pip5k1b
Pkd1
Pkd1l2
Pkn3
Platr16
Platr23
Platr8
Plcd4
Plekhd1
Plk3
Plxdc1
Pmvk
Pnlip
Poglut3
Polg2
Polh
Porcn
Pou6f1
Ppp1r12c
Ppp1r16a
Ppp1r3g
Pramel3
Pramel4
Prdm15
Prkcg
Proser2
Prr12
Prr15l
Prss45
Prss46
Psmb10
Psme1
Ptafr
Ptk7
Ptpmt1
Ptrh1
Purb
Pyy
Pzp
Qsox2
Rab24
Rab40c
Rab42
Rabep2
Ramp2
Rasl10a
Rbm4
Rc3h2
Rcn3
Rgs11
Rhbdl2
Rhbdl3
Rhcg
Rhog
Rinl
Riox1
Ripk3
Rnd2
Rnf128
Rnf151
Rnf225
Rpgrip1
Rpl24
Rpl3l
Rps10
Rtn2
Rtn4rl1
Rusc1
S1pr5
Sardh
Scarf1
Scd1
Scd2
Scgb2b26
Sdr39u1
Sec1
Sectm1a
Sez6l
Sez6l2
Sgpl1
Sh2b1
Sh2b2
Sh3bp5l
Shbg
Shisal2a
Sigirr
Sike1
Slc11a1
Slc13a2
Slc16a14
Slc17a9
Slc1a5
Slc22a21
Slc25a41
Slc25a42
Slc25a43
Slc26a8
Slc27a4
Slc27a5
Slc2a3
Slc2a8
Slc39a4
Slc43a2
Slc46a1
Slc4a11
Slc51a
Slc5a11
Slc8b1
Smad7
Smim13
Smim40-ps
Smim6
Smpdl3b
Smtn
Snhg11
Snhg17
Snn
Snrnp35
Snx10
Soat2
Socs2
Sowaha
Sox13
Sox18
Spag9
Spg7
Spns2
Sppl3
Sptbn2
Srd5a1
Srxn1
Stac2
Stk19
Stmn3
Stpg3
Stx3
Sult2b1
Suv39h1
Syna
Sync
Syncrip
Syngr1
Taco1os
Tacr3
Tagln2
Tango6
Tatdn1
Tbc1d12
Tbc1d9
Tbx21
Tbxa2r
Tcfl5
Tcirg1
Tcp11
Tdgf1
Tead4
Tec
Tef
Tescl
Tex13b
Tex43
Tfpi2
Theg
Tigd3
Timm22
Timp1
Tjp3
Tlcd2
Tm4sf5
Tmc8
Tmed1
Tmem130
Tmem150c
Tmem160
Tmem173
Tmem177
Tmem190
Tmem191c
Tmem202
Tmem208
Tmem69
Tmprss12
Tmprss9
Tmx2
Tnfrsf13b
Tnfrsf19
Traf2
Trim25
Trim8
Triml2
Trmt61a
Trmt61b
Trp53bp2
Tsc22d3
Tsen15
Tsen2
Tsks
Tsr2
Tssk6
Tstd3
Tti2
Ttll6
Tubgcp6
Tut4
Tyro3
Uap1l1
Uck1
Ucp2
Ufsp1
Unc45a
Unkl
Urgcp
Urm1
Uty
Vasn
Vmn2r52
Vps18
Vps26b
Vwa5b2
Wtip
Xpot
Yars
Yeats2
Zc3h7a
Zcchc13
Zfp119b
Zfp13
Zfp280c
Zfp292
Zfp324
Zfp385c
Zfp626
Zfp668
Zfp800
Zfp871
Zfp874b
Zfyve27
Zgpat
Zyg11a
