# Supplementary material for: Single-cell full-length isoform sequencing reveals an abundance of 3’ prime partial transcripts in maternally inherited RNAs
Source: Research Square preprint supplement (doi:10.21203/rs.3.rs-1752209/v1), 2022-06-15
Supplement: Supplementary file 8 [file 6c0d6c4592074edecbba5d51.xlsx]

## Sheet: cell information
Cell id	Barcode sequence	UMI_Count
oocyte1	GACTATGGTGTTGCCG	261108
oocyte2	TACCCGTCAGCAGTTT	220211
oocyte3	TGCTTGCGTTACGATC	198674
oocyte4	CACACAAGTGGAAATT	198125
oocyte5	TATCTTGGTGATTGGG	170681
oocyte6	TACCTCGAGAGAGGGC	482787
oocyte7	GTTACGAGTAAGAACT	236000
oocyte8	TTCGCTGGTTCCATTT	236237
oocyte9	GCAGCTGGTATCGTGT	215961
oocyte10	AGTAGTCGTCCCTCAT	215090
Zygote1	CTCGAGGTCTCTCTTC	224485
Zygote2	AGGGTTTGTTCTCGCT	282687
Zygote3	CGCATAACAGCTTTCC	222888
Zygote4	AGGCTGCGTGGCTGCT	197971
Zygote5	GTTGAACTCATGGGAG	903243
Zygote6	CTCAATTGTTTCACTT	611086
Zygote7	CCACGTTTCAGTGCGC	491789
Zygote8	TACCGGGTCACCATCC	289239
Zygote9	CAGATCACAACTGCCG	288680
E2-1-1	GTCACTCAGTAGGTTA	93592
E2-1-2	AACGAAAGTGGCACTC	78694
E2-2-1	ATTCAGGTCGAGTCTA	308126
E2-2-2	AAGACTCGTATCAGGG	449340
E2-3-1	TGTCCCAAGATCCCAT	379203
E2-3-2	GTTGAACTCGTAGTCA	502893
E2-4-1	AGTTAGCTCATTCGTT	131394
E2-4-2	TGAATCGTCTCTTCAA	115877
E2-5-1	TCCCACATCTTCACAT	120645
E2-5-2	CTCAAGAGTTGTGTTG	41318
L2-1-1	TCTCAGCAGGCTGGAT	18574
L2-2-1	AGTTCGAGTCTTGTCC	380316
L2-2-2	TGCTCGTCATCGCTAA	176976
L2-3-1	GAAGGGTGTCCAAATC	429669
L2-3-2	GGGTGTCCATAGGAGC	125698
L2-4-1	GGGTTTAGTGGTCAAG	89389
L2-4-2	GCACGTGTCATTGTGG	62131
L2-5-1	AAAGGATCAGAACTAA	79425
L2-5-2	CATCGCTAGTGAATAC	83574
L2-6-1	TGAATGCCAGACAATA	77039
L2-6-2	TGCATCCCACTCCTGT	94685
4cell-1-1	TCGGGCAGTGGCTCTG	27768
4cell-1-2	AGTCACATCGAGATGG	22495
4cell-1-3	TTCACGCTCACGGGCT	33242
4cell-1-4	AAGCGAGGTAGCACAG	30032
4cell-2-1	GTGTGATAGCCGGAAT	121467
4cell-2-3	CGTAATGTCTAGTTCT	41966
4cell-3-1	CACCGTTTCGGCCCAA	27221
4cell-3-2	TTGGATGTCCGTATAG	25827
4cell-3-3	AGAGCCCCACTATGTG	29468
4cell-4-1	AGTGTTGGTAGAGATT	61785
4cell-4-2	ACTTCCGGTCTTCTAT	56121
4cell-4-3	CAGATACCATATAGCC	56899
4cell-4-4	GATCAGTCAGGGCTTC	50718
4cell-5-1	TCGCTTGTCAAGCCCG	55160
4cell-5-2	TGTGAGTCAGGGTCTC	58032
4cell-5-3	GTCTGTCAGCCGCTTG	56949
4cell-5-4	ACTTTCACATAATCGC	50209
8cell-1-1	TTCTTCCTCGGCACTG	39655
8cell-1-2	AGGTCATAGAGCAGCT	32252
8cell-1-3	CCCAACTTCGCCAATA	34150
8cell-1-4	CTTTCAAGTTGCATCA	32626
8cell-1-5	TCATACTCAAGGTACG	35074
8cell-1-6	GCTGCAGTCGACATCA	40956
8cell-1-7	TACGTCCTCGCGGACT	35402
8cell-1-8	AGCGTATAGCGTATAA	34262
8cell-2-1	CCGGTGAGTAGCGTAG	106770
8cell-2-2	TGAGTCATCAGTAGGG	177756
8cell-2-3	AACCTGAGTTCCTAGA	162109
8cell-2-4	AACAAAGAGACTTAAG	174496
8cell-2-5	AATGGAAGTCCGGTCA	176281
8cell-2-6	ACCCTCAGTTCCTAGA	104551
8cell-2-7	GCATGATGTGTTCCTC	238498
8cell-2-8	GTAATGCAGAGAGCAA	251800
8cell-3-1	TTCGATTTCTTCCCGA	26843
8cell-3-2	CCACGTTGTATTCCGA	14266
8cell-3-3	ATCACGACAACGCCCA	12938
8cell-4-1	TGGAGAGGTCTACTGA	50072
8cell-4-2	CCGCAAGGTATGCTAC	51463
8cell-4-3	GACTATGAGTCATGGG	45167
8cell-4-4	GTCACGGCACGGATCC	43798
8cell-4-5	GCAGGCTTCCAACCGG	46153
8cell-4-6	ATTATCCTCTGCGGCA	51015
8cell-4-7	CCTAACCGTCCCGCAA	25621
16cell-1-1	GTAGGAGTCCGTAATG	39009
16cell-1-2	CCATCACTCGCCAGAC	37920
16cell-1-3	AGGGTTTAGCTTAAGA	49288
16cell-1-4	AGTTAGCCAACTCATG	48271
16cell-1-5	CGATGCGTCTCTGCCA	39931
16cell-1-6	TGGGAGAAGACGGTTG	33850
16cell-1-7	CCATCACTCCAGTGTA	53092
16cell-1-8	CACAGGCGTCAACACT	58587
16cell-1-9	CGGGCATTCATTTACC	32835
16cell-1-10	GGAGCAACAAATGCTC	22148
16cell-1-11	ATGCCTCCAGAAGTGC	28790
16cell-2-1	AGAGCAGTCTGTCGCT	137189
16cell-2-2	AGGACGAGTATGTCTG	132122
16cell-2-3	CCGTAGGAGGGAGGGT	179121
16cell-2-4	TGGGAGAAGAGTTCGG	94088
16cell-2-5	TCATATCGTCTACAAC	173979
16cell-2-6	TAATCTCCAACTAGAA	155661
16cell-2-7	GTGAGTTAGCTAGAGC	89422
16cell-2-8	CTACTATCATCGGCCA	83844
16cell-2-9	GTCGTAAGTCTTCTAT	151439
16cell-2-10	GAAGAATCACGGTGTC	136007
16cell-2-11	CTCACTGTCGTAGCTA	185569
16cell-2-12	CTGTGGGCAGTCGGAA	117149
16cell-2-13	AGAGCAGAGTGTACCT	165581
16cell-2-14	GTAGAAATCGCCTATC	93044
16cell-2-15	TTCACCGGTCGTCAGC	143343
16cell-3-1	GTGCGTGGTCTACAGT	18227
16cell-3-2	GCCCGAAGTTAACCTG	19184
16cell-3-3	CAACCTCCACGATAGG	14975
16cell-3-4	ATGGATCTCACATACG	15098
16cell-3-5	CAATCGAAGATTGCGG	13318
16cell-3-6	CGTTAGAGTCTACAGT	14748
16cell-3-7	GTTACAGAGTCATCGT	10215
16cell-4-1	TAGAGTCAGAGAGTTT	43424
16cell-4-2	GCACGGTTCATTATCC	18114
16cell-4-3	TCAGGGCCAGGCAATG	13444
16cell-4-4	TGTGCGGGTCGCACGT	25053
16cell-4-5	GTTGCTCGTATCCTCC	11233
32cell-1	TAAGCGTGTTAGCGGA	162399
32cell-3	CTGAGCGAGTTCATGC	85588
32cell-4	AAACGCTTCGCTGACG	132723
32cell-5	CTATCTAGTTTGACAC	56670
32cell-6	GGGAAGTTCGCCTTTG	221962
32cell-7	GTTCGCTGTGAACGGT	193969
32cell-8	GTCAGCGTCCATCACC	170964
32cell-9	CATTGCCCACAGCCTG	160365
32cell-11	GGATCTAAGCTAGAGC	158934
32cell-12	AAGTGAAGTCCATCTC	191233
32cell-13	GCCAGGTGTTCGGCTG	176816
32cell-14	CCAATGATCAAATGAG	52946
32cell-15	GAGGGATGTTACTCAG	211634
32cell-16	AAACGCTTCAAGCGTT	104237
32cell-17	CGGAACCCAAGACGGT	218424
32cell-18	GATCATGCATGATAGA	87800
32cell-19	GTGTTAGGTCCTGGTG	201436
32cell-20	ACTTCCGTCACCTTAT	178518
32cell-21	GCTCAAAGTAACGGTG	221238
32cell-22	TCATGTTGTCTTACAG	193684
32cell-23	ATTCATCCAAGCCATT	118863
32cell-24	TCGACCTCAACGAGGT	283897
blastocyst-1	CAATACGCATAGATGA	43048
blastocyst-2	GTGTGGCGTGGATGAC	41938
blastocyst-3	CAGGCCACATTCAGGT	54721
blastocyst-4	TATTGGGAGTGCAGCA	51546
blastocyst-5	TAGTGCAGTTAAGACA	57270
blastocyst-6	CATGCGGTCCGCAGTG	18666
blastocyst-7	AAACGCTGTGGGCTCT	48450
blastocyst-8	CTTCAATGTTAACCTG	43948
blastocyst-9	TCGGTCTAGCCTGAGA	54077
blastocyst-10	TCGGTCTAGCAGCCTC	48047
blastocyst-11	GTGAGCCTCTGGTTGA	54190
blastocyst-12	ATTCCATTCTCTCGCA	57566
blastocyst-13	CTCTCAGTCGCTAATG	45028
ESC-1	GCTACAAAGCTCCACG	30330
ESC-2	AGGAAATAGTCTGCGC	30191
ESC-3	CAGCAGCTCCGCAGTG	31730
ESC-4	TTGGATGTCCCATAGA	23253
ESC-5	TCTGCCATCTTGAGCA	18184

## Sheet: Raw data quality summary
	Library	Batch1	Batch2	Batch3
Polymerase Reads	Polymerase Reads	5534582	6002833	7099439
	Polymerase Yield (GB)	427.02	540.46	410.25
	Polymerase Max Length	479619	493469	483234
	Polymerase Mean Length	77155.4	90033.6	57786.3
	Polymerase Read N50	154554	167339	130615
Subreads	Subread Yield (GB)	420.1	535.33	404.78
	Subreads Max Length	479619	493469	483234
	Subreads Mean Length	3001.47	4482.57	3127.49
	Subread N50	3557	5186	3508
CCS	CCS Reads	4412788	5079207	5914414
	CCS Yield (GB)	15.6	25.46	23.5
	CCS Max Length	27871	27593	27810
	CCS Mean Length	3534.33	5013.54	3973.65
	CCS N50 Length	4216	5791	4760
	CCS Mean Passes	27	19	17
	CCS MeanQV	0.96	0.97	0.94
full-length (FL) isoform detection	All Paired	11184443	20967437	11008106
	FL	10013148	19427495	9427600
	Non-FL	206358	283797	283953
	Unknow	964937	1256144	1296552
	FL(%)	89.53	92.66	85.64
	Non-FL(%)	1.85	1.35	2.58
	Unknow(%)	8.63	5.99	11.78
	FL MeanLen	934.75	888.57	1081.15
	FL N50	1128	1044	1365
cell barcode identification	FLNC	10013148	19427495	9427600
	cell barcode in Whitelist	8858087	17083701	7834317
	cell barcode in Whitelist(%)	88.46	87.94	83.1
	cell barcode Correction	254281	553029	334615
	cell barcode Correction(%)	2.54	2.85	3.55
	Total Corrected cell barcode	9112368	17636730	8168932
	Total Corrected cell barcode(%)	91	90.78	86.65
