# Supplementary material for: Single-cell full-length isoform sequencing reveals an abundance of 3’ prime partial transcripts in maternally inherited RNAs
Source: Research Square preprint supplement (doi:10.21203/rs.3.rs-1752209/v1), 2022-06-15
Supplement: Supplementary file 9 [file 7e14dbc52c045fb0b41add51.xlsx]

## Sheet: siRNA
	Sense (5’-3’)
siNC	UUCUCCGAACGUGUCACGUdTdT
siNcl	GCUUCAUUUGAAGAUGCUAdTdT

## Sheet: Vector construction primers
Vector construction
pcDNA3.1-EGFP
EGFP-F-pcDNA3.1	AAGCTGGCTAGTTAAGCTTGGTACCGAGCTCGGATCCGCCACCATGGTGAGCAAGGGCGAGGAGC
EGFP-R-pcDNA3.1	TGTTCGAACCGCGGGCCCTCTAGACTACTTGTACAGCTCGTCCAT
pcDNA3.1-EGFP-T2A-Ncl-S-350
EGFP-F-pcDNA3.1	AAGCTGGCTAGTTAAGCTTGGTACCGAGCTCGGATCCGCCACCATGGTGAGCAAGGGCGAGGAGC	EGFP-F-pcDNA3.1	AAGCTGGCTAGTTAAGCTTGGTACCGAGCTCGGATCCGCCACCATGGTGAGCAAGGGCGAGGAGC	EGFP-F-pcDNA3.1	AAGCTGGCTAGTTAAGCTTGGTACCGAGCTCGGATCCGCCACCATGGTGAGCAAGGGCGAGGAGC	EGFP-F-pcDNA3.1	AAGCTGGCTAGTTAAGCTTGGTACCGAGCTCGGATCCGCCACCATGGTGAGCAAGGGCGAGGAGC	EGFP-F-pcDNA3.1	AAGCTGGCTAGTTAAGCTTGGTACCGAGCTCGGATCCGCCACCATGGTGAGCAAGGGCGAGGAGC	EGFP-F-pcDNA3.1	AAGCTGGCTAGTTAAGCTTGGTACCGAGCTCGGATCCGCCACCATGGTGAGCAAGGGCGAGGAGC	EGFP-F-pcDNA3.1	AAGCTGGCTAGTTAAGCTTGGTACCGAGCTCGGATCCGCCACCATGGTGAGCAAGGGCGAGGAGC	EGFP-F-pcDNA3.1	AAGCTGGCTAGTTAAGCTTGGTACCGAGCTCGGATCCGCCACCATGGTGAGCAAGGGCGAGGAGC	EGFP-F-pcDNA3.1	AAGCTGGCTAGTTAAGCTTGGTACCGAGCTCGGATCCGCCACCATGGTGAGCAAGGGCGAGGAGC	EGFP-F-pcDNA3.1	AAGCTGGCTAGTTAAGCTTGGTACCGAGCTCGGATCCGCCACCATGGTGAGCAAGGGCGAGGAGC	EGFP-F-pcDNA3.1	AAGCTGGCTAGTTAAGCTTGGTACCGAGCTCGGATCCGCCACCATGGTGAGCAAGGGCGAGGAGC	EGFP-F-pcDNA3.1	AAGCTGGCTAGTTAAGCTTGGTACCGAGCTCGGATCCGCCACCATGGTGAGCAAGGGCGAGGAGC	EGFP-F-pcDNA3.1	AAGCTGGCTAGTTAAGCTTGGTACCGAGCTCGGATCCGCCACCATGGTGAGCAAGGGCGAGGAGC	EGFP-F-pcDNA3.1	AAGCTGGCTAGTTAAGCTTGGTACCGAGCTCGGATCCGCCACCATGGTGAGCAAGGGCGAGGAGC	EGFP-F-pcDNA3.1	AAGCTGGCTAGTTAAGCTTGGTACCGAGCTCGGATCCGCCACCATGGTGAGCAAGGGCGAGGAGC	EGFP-F-pcDNA3.1	AAGCTGGCTAGTTAAGCTTGGTACCGAGCTCGGATCCGCCACCATGGTGAGCAAGGGCGAGGAGC	EGFP-F-pcDNA3.1	AAGCTGGCTAGTTAAGCTTGGTACCGAGCTCGGATCCGCCACCATGGTGAGCAAGGGCGAGGAGC	EGFP-F-pcDNA3.1	AAGCTGGCTAGTTAAGCTTGGTACCGAGCTCGGATCCGCCACCATGGTGAGCAAGGGCGAGGAGC	EGFP-F-pcDNA3.1	AAGCTGGCTAGTTAAGCTTGGTACCGAGCTCGGATCCGCCACCATGGTGAGCAAGGGCGAGGAGC	EGFP-F-pcDNA3.1	AAGCTGGCTAGTTAAGCTTGGTACCGAGCTCGGATCCGCCACCATGGTGAGCAAGGGCGAGGAGC	EGFP-F-pcDNA3.1	AAGCTGGCTAGTTAAGCTTGGTACCGAGCTCGGATCCGCCACCATGGTGAGCAAGGGCGAGGAGC	EGFP-F-pcDNA3.1	AAGCTGGCTAGTTAAGCTTGGTACCGAGCTCGGATCCGCCACCATGGTGAGCAAGGGCGAGGAGC	EGFP-F-pcDNA3.1	AAGCTGGCTAGTTAAGCTTGGTACCGAGCTCGGATCCGCCACCATGGTGAGCAAGGGCGAGGAGC	EGFP-F-pcDNA3.1	AAGCTGGCTAGTTAAGCTTGGTACCGAGCTCGGATCCGCCACCATGGTGAGCAAGGGCGAGGAGC	EGFP-F-pcDNA3.1	AAGCTGGCTAGTTAAGCTTGGTACCGAGCTCGGATCCGCCACCATGGTGAGCAAGGGCGAGGAGC
EGFP-T2A-R	TGGGCCAGGATTCTCCTCGACGTCACCGCATGTTAGCAGACTTCCTCTGCCCTCTCCTTGTACAGCTCGTCCATGC
T2A-Ncl-F	TCGAGGAGAATCCTGGCCCAATGGTGAAGCTCGCAAAGGC
dT-R-pcDNA3.1	GTTCGAACCGCGGGCCCTTTTTTTTTTTTTTTTTTTT
pcDNA3.1-EGFP-T2A-Srsf4
T2A-mSrsf4-F	TCGAGGAGAATCCTGGCCCAATGAGTGAATGTGGGAATGG
mSrsf4-sc-R-pcDNA3.1	GTTCGAACCGCGGGCCCTTTAGGACCTTGAGTGGGACC
pcDNA3.1-Ncl-S-350-myc
Ncl-350-F-pcDNA3.1	AAGCTGGCTAGTTAAGCTTGGTACCGAGCTCGGATCCGCCACCATGGTGAAGCTCGCAAAGGC
dT-R-pcDNA3.1	GTTCGAACCGCGGGCCCTTTTTTTTTTTTTTTTTTTT
[truncated: 5,000 more columns]

## Sheet: 3'  partial transcripts PCR
3' prime partial transcripts primer
Ncl-F	ATGGTGAAGCTCGCAAAGGC
DNAjc3-F	ATGGTGGCCCCCGGCTCGGTG
Sf3b2-F	ATGGCGGCGGAGCATCCCGAACCT
Hsp90aa1-F	ATGCCTGAGGAAACCCAGACCCA
Srpk1-F	ATGGAGCGGAAAGTGCTCGCGCT
oligo dT	AAGCAGTGGTATCAACGCAGAGTACTTTTTTTTTTTTTTTTTTTTTTTTT

## Sheet: qPCR primers
qPCR primers
mNcl-qPCR-F	AAAGGCAAAAAGGCTACCACA
mNcl-qPCR-R	GGAATGACTTTGGCTGGTGTAA
mDux-qPCR-F	CACTCGACTCACCTCGCTAC
mDux-qPCR-R	CCATCCGACCCTTGTGACG
mDub1-qPCR-F	GCAGGCCAACCTCAAACAG
mDub1-qPCR-R	CGCAGGGCTCTCCTAAATCTT
Zscan4c-qPCR-F	AGCAAAAGACCTTCAGACCAAC
Zscan4c-qPCR-R	GGGGAAAAGTTTAGCTGAGCAC
MERVL-LTR-qPCR-F	CTTCCATTCACAGCTGCGACTG
MERVL-LTR-qPCR-R	CTAGAACCACTCCTGGTACCAAC
IAPEz-qPCR-F	CTCCATGTGCTCTGCCTTCC
IAPEz-qPCR-R	CCCCGTCCCTTTTTTAGGAGA
Gm4340-qPCR-F	CGAGGCACTGGGTCTAAGAG
Gm4340-qPCR-R	CCAATGAACAGGTCATGCTG
Gm2022-qPCR-F	AACAGGCGCAGAGGTAAAAA
Gm2022-qPCR-R	GCACAGCCTCCTTACACCAT
Tcstv1-qPCR-F	TGAACCCTGATGCCTGCTAAGACT
Tcstv1-qPCR-R	AGATGGCTGCAAAGACACAACTGC
Tcstv3-qPCR-F	AGAAAGGGCTGGAACTTGTGACCT
Tcstv3-qPCR-R	AAAGCTCTTTGAAGCCATGCCCAG
Pid1-qPCR-F	AAGGAACCTATACCAGCAGTCC
Pid1-qPCR-R	CCTTGCAGCCACTATGAGTCC
Srsf4-qPCR-F	CACATTGGGAAAGCAAAACTCAC
Srsf4-qPCR-R	TCACGCAGATCATCAAACTCC
